# Supplementary material for: Negative pressure wound therapy compared with standard moist wound care on diabetic foot ulcers in real-life clinical practice: results of the German DiaFu-RCT
Source: PubMed Central journal article supplement — BMJ Open. 2020 Mar 23;10(3):e026345. doi: 10.1136/bmjopen-2018-026345 (PMC7202734; doi:10.1136/bmjopen-2018-026345), 2020-03-23
Supplement: bmjopen-2018-026345.draft_revisions.pdf [file bmjopen-2018-026345.draft_revisions.pdf]

# BMJ Open

BMJ Open is committed to open peer review. As part of this commitment we make the peer review history of every article we publish publicly available.

When an article is published we post the peer reviewers' comments and the authors' responses online. We also post the versions of the paper that were used during peer review. These are the versions that the peer review comments apply to.

The versions of the paper that follow are the versions that were submitted during the peer review process. They are not the versions of record or the final published versions. They should not be cited or distributed as the published version of this manuscript.

BMJ Open is an open access journal and the full, final, typeset and author-corrected version of record of the manuscript is available on our site with no access controls, subscription charges or pay-per-view fees (<http://bmjopen.bmj.com>).

If you have any questions on BMJ Open's open peer review process please email [info.bmjopen@bmj.com](mailto:info.bmjopen@bmj.com)

# BMJ Open

## Negative Pressure Wound Therapy compared with standard moist wound care on diabetic foot ulcers in real-life clinical practice – Results of the German DiaFu-RCT

|                               |                                                                                                                                                                                                                                                                                                                                                                                                                                                                                                                                                                                                                                                                                                                                                                                                                                                                                                                                                                                                                                                                                     |
|-------------------------------|-------------------------------------------------------------------------------------------------------------------------------------------------------------------------------------------------------------------------------------------------------------------------------------------------------------------------------------------------------------------------------------------------------------------------------------------------------------------------------------------------------------------------------------------------------------------------------------------------------------------------------------------------------------------------------------------------------------------------------------------------------------------------------------------------------------------------------------------------------------------------------------------------------------------------------------------------------------------------------------------------------------------------------------------------------------------------------------|
| Journal:                      | <i>BMJ Open</i>                                                                                                                                                                                                                                                                                                                                                                                                                                                                                                                                                                                                                                                                                                                                                                                                                                                                                                                                                                                                                                                                     |
| Manuscript ID                 | bmjopen-2018-026345                                                                                                                                                                                                                                                                                                                                                                                                                                                                                                                                                                                                                                                                                                                                                                                                                                                                                                                                                                                                                                                                 |
| Article Type:                 | Original research                                                                                                                                                                                                                                                                                                                                                                                                                                                                                                                                                                                                                                                                                                                                                                                                                                                                                                                                                                                                                                                                   |
| Date Submitted by the Author: | 28-Aug-2018                                                                                                                                                                                                                                                                                                                                                                                                                                                                                                                                                                                                                                                                                                                                                                                                                                                                                                                                                                                                                                                                         |
| Complete List of Authors:     | Seidel, Dörthe; Universität Witten/Herdecke, Institut für Forschung in der Operativen Medizin (IFOM)<br>Storck, Martin; Städtisches Klinikum Karlsruhe gGmbH, Klinik für Gefäß- und Thoraxchirurgie<br>Lawall, Holger; Praxis für Herz-Kreislaufkrankungen; Max-Grundig Klinik<br>Wozniak, Gernold; Knappschaftskrankenhaus Bottrop GmbH, Gefäßchirurgische Klinik<br>Mauckner, Peter; St. Remigius Krankenhaus Opladen, Innere Medizin<br>Hochlenert, Dirk; Gemeinschaftspraxis Schlotmann-Hochlenert-Zavaleta-Haberstock<br>Wetzel-Roth, Walter; Chirurgische Praxis Wetzel-Roth<br>Sondern, Klemens; Marien Hospital Dortmund-Hombruch, Klinik für Innere Medizin/Diabetologie<br>Hahn, Matthias; Helfenstein Klinik, Allgemein- und Viszeralchirurgie<br>Rothenaicher, Gerhard; Chirurgische Praxis Rothenaicher<br>Krönert, Thomas; Thüringen-Kliniken "Georgius Agricola" GmbH, Klinik für Gefäßchirurgie<br>Zink, Karl; Diabetes Klinik<br>Neugebauer, Edmund; Universität Witten/Herdecke Department für Humanmedizin; Medizinische Hochschule Brandenburg -Theodor Fontane |
| Keywords:                     | negative pressure wound therapy, standard moist wound care, wound healing, benefit assessment, wound treatment, health care research                                                                                                                                                                                                                                                                                                                                                                                                                                                                                                                                                                                                                                                                                                                                                                                                                                                                                                                                                |
|                               |                                                                                                                                                                                                                                                                                                                                                                                                                                                                                                                                                                                                                                                                                                                                                                                                                                                                                                                                                                                                                                                                                     |

SCHOLARONE™  
Manuscripts

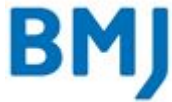

I, the Submitting Author has the right to grant and does grant on behalf of all authors of the Work (as defined in the below author licence), an exclusive licence and/or a non-exclusive licence for contributions from authors who are: i) UK Crown employees; ii) where BMJ has agreed a CC-BY licence shall apply, and/or iii) in accordance with the terms applicable for US Federal Government officers or employees acting as part of their official duties; on a worldwide, perpetual, irrevocable, royalty-free basis to BMJ Publishing Group Ltd ("BMJ") its licensees and where the relevant Journal is co-owned by BMJ to the co-owners of the Journal, to publish the Work in this journal and any other BMJ products and to exploit all rights, as set out in our [licence](#).

The Submitting Author accepts and understands that any supply made under these terms is made by BMJ to the Submitting Author unless you are acting as an employee on behalf of your employer or a postgraduate student of an affiliated institution which is paying any applicable article publishing charge ("APC") for Open Access articles. Where the Submitting Author wishes to make the Work available on an Open Access basis (and intends to pay the relevant APC), the terms of reuse of such Open Access shall be governed by a Creative Commons licence – details of these licences and which [Creative Commons](#) licence will apply to this Work are set out in our licence referred to above.

Other than as permitted in any relevant BMJ Author's Self Archiving Policies, I confirm this Work has not been accepted for publication elsewhere, is not being considered for publication elsewhere and does not duplicate material already published. I confirm all authors consent to publication of this Work and authorise the granting of this licence.

1  
2  
3  
4  
5  
6  
7  
8  
9  
10  
11  
12  
13  
14  
15  
16  
17  
18  
19  
20  
21  
22  
23  
24  
25  
26  
27  
28  
29  
30  
31  
32  
33  
34  
35  
36  
37  
38  
39  
40  
41  
42  
43  
44  
45  
46  
47  
48  
49  
50  
51  
52  
53  
54  
55  
56  
57  
58  
59  
60

1 **Negative Pressure Wound Therapy compared with standard moist wound care on**  
2 **diabetic foot ulcers in real-life clinical practice – Results of the German DiaFu-RCT**

3  
4 Dörthe Seidel, Martin Storck, Holger Lawall, Gernold Wozniak, Peter Maukner, Dirk Hochlenert, Walter Wetzel-Roth,  
5 Klemens Sondern, Matthias Hahn, Gerhard Rothenaicher, Thomas Krönert, Karl Zink, Edmund Neugebauer

6  
7 Institut für Forschung in der Operativen Medizin (IFOM), University of Witten/Herdecke, Köln, Germany (D Seidel MD),  
8 Doerthe.Seidel@uni-wh.de

9 Klinik für Gefäß- und Thoraxchirurgie, Städtisches Klinikum Karlsruhe, Karlsruhe, Germany (Prof M Storck MD),  
10 Martin.Storck@klinikum-karlsruhe.de

11 Praxis für Herz-Kreislaufkrankungen, Ettlingen und Max-Grundig Klinik Bühlerhöhe, Germany (Dr med H Lawall MD),  
12 holger.lawall@gmail.com

13 Gefäßchirurgische Klinik, Knappschafts-Krankenhaus, Bottrop, Germany (Prof G Wozniak MD), gernold.wozniak@kk-  
14 bottrop.de

15 Innere Medizin, St. Remigius Krankenhaus Opladen, Leverkusen, Germany (Dr med P Maukner MD), peter-  
16 mauckner@live.de

17 Gemeinschaftspraxis Schlotmann-Hochlenert-Zavaleta-Haberstock, Köln, Germany (Dr med D Hochlenert MD),  
18 dirk.hochlenert@web.de

19 Chirurgische Praxis Wetzel-Roth, Buchloe, Germany (Dr med W Wetzel-Roth MD), info@wetzel-roth.de

20 Klinik für Innere Medizin/Diabetologie, Marien Hospital Dortmund-Hombruch, Dortmund, Germany (Dr med Sondern MD),  
21 klemens.sondern@marien-hospital-dortmund.de

22 Allgemein- und Viszeralchirurgie, Helfenstein Klinik, Geisslingen, Germany (Dr med M Hahn, MD), matthias.hahn@af-k.de

23 Chirurgische Praxis Rothenaicher, München, Germany (G Rothenaicher MD), rothenaicher@arcor.de

24 Klinik für Gefäßchirurgie, Thüringen-Kliniken "Georgius Agricola" GmbH, Saalfeld, Germany (Dr med T Krönert MD),  
25 tkroenert@thueringen-kliniken.de

26 Diabetes Klinik, Bad Mergentheim, Germany (Dr med K Zink MD), zink@diabetes-zentrum.de

27 University of Witten/Herdecke, Köln, Germany (Prof E Neugebauer), Edmund.Neugebauer@uni-wh.de

28  
29 **Correspondence to:**

30 Dörthe Seidel\*

31 Institut für Forschung in der Operativen Medizin (IFOM)

32 University of Witten/Herdecke

33 Ostmerheimerstraße 200 Haus 38

34 Köln (Cologne)

35 51109 Germany

36 [Doerthe.Seidel@uni-wh.de](mailto:Doerthe.Seidel@uni-wh.de)

**Abstract****Objectives**

The aim of the DiaFu-study was to evaluate effectiveness and safety of negative pressure wound therapy (NPWT) in clinical practice. The hypothesis was that NPWT leads to faster and more frequent closure of diabetic foot wounds than standard moist wound care (SMWC).

**Design**

In this observer-blinded, controlled trial patients were randomized in a 1:1 ratio stratified by study site and ulcer severity grade using a web-based tool.

**Setting**

This German cross-sectoral study was conducted in 40 surgical and internal medicine in- and outpatient facilities specialized in diabetes foot care.

**Participants**

368 patients were randomized and 345 participants were included in the ITT population. Consentable adult patients suffering from a diabetic foot ulcer at least for 4 weeks, suitable for study participation, and without contraindication for NPWT were allowed to be included.

**Interventions**

NPWT using the devices of KCI and Smith & Nephew was compared with SMWC according to local standards and guidelines.

**Primary and secondary outcome measures**

Primary endpoints were wound closure rate and healing time within 16 weeks. Secondary endpoints were wound and treatment related adverse events, amputations, recurrences, wound size and wound tissue development, pain, and quality of life.

**Results**

In the ITT population 25 patients in the NPWT-arm (14.6%) and 21 patients in the SMWC-arm (12.1%) achieved wound closure ( $p=0.53$ ). Wound healing time was not significantly shorter in the NPWT-arm ( $p=0.244$ ). 96 patients in the NPWT-arm compared with 72 patients in the SMWC-arm had at least one adverse event ( $p=0.007$ ), but only 11 events have been possibly related to NPWT. Premature treatment cessation had a significant negative impact on wound closure.

**Conclusions**

NPWT is not superior to SMWC in real life. The overall wound closure rate is low. Deviations from treatment guidelines limit the treatment success. Adequate quality assurance is necessary.

**Trial registration**

Clinical Trials.gov: NCT01480362

## 71 **Strengths and limitations of this study**

- 72 • The DiaFu study evaluates the effectiveness and safety of NPWT compared to the current standard of  
73 care (SMWC) in clinical practice while applying methods against bias whenever possible.
- 74 • Due to the nature of the compared treatment methods, a direct blinding of patients and investigator was  
75 not possible.
- 76 • This study assesses patient-relevant endpoints and includes a high number of participants without  
77 selecting specific patient groups.
- 78 • Strength of the DiaFu-study is the high transferability of the results to the real medical care situation.
- 79 • This healthcare research study did not focus on a qualitative evaluation of the treatment of the  
80 underlying disease or other comorbidities, but selected study sites by means of a qualification checklist  
81 and referred to the binding nature of the existing evidence-based treatment guidelines in the study  
82 protocol.

## 84 **Background**

85 Wound therapy is a growing challenge for health care professionals as well as for the entire health system. Acute  
86 and chronic wounds affect at least 1% of the population worldwide [1]. The diabetic foot ulcer is one of the most  
87 important examples of chronic wounds which in case of severe complications can lead to leg amputation or  
88 death. The World Health Organization (WHO) and the International Diabetes Federation (IDF) estimate that  
89 more than 400 million people worldwide suffer from diabetes [2, 3]. Several authors estimate that about 15% of  
90 all patients suffering from diabetes will develop a diabetic foot ulcer during their lifetime [4, 5] and that  
91 approximately 50-70% of all lower limb amputations are due to diabetes [5]. Only a few of the available modern  
92 moist wound dressings and topical agents have been convincingly shown to achieve higher wound closure rates  
93 compared with traditional wet gauze dressings [6, 7]. Innovative medical devices are substantial for modern  
94 wound care. Negative pressure wound therapy (NPWT) is one of the most commonly used and well-established  
95 advanced therapies to facilitate wound healing [8]. The first use of vacuum sealing was described in 1993 by  
96 Fleischmann et al. [9] and the commercially available product was developed later in the 1990s [10, 11]. Positive  
97 effects of NPWT on wound healing have been demonstrated in various basic studies [11, 12].

98 The European marketing authorization for medical products using the treatment method NPWT only requires  
99 information on the functionality within the intended use of the respective device. Medical devices with CE  
100 marking (is no longer of literal significance, but a symbol of over-the-counter marketability in the European  
101 Union) can be immediately used in in-patient care and are subject to the European guidelines for the

1  
2  
3 102 implementation of adequate post marketing surveillance. However, in order to be able to answer the question  
4 103 about (added) patient benefit and reimbursability of the treatment method by the social health insurance,  
5 104 qualitatively adequate clinical studies are necessary. Social health insurance systems ensure health care for a  
6 105 large part of the population in many European countries. The patient relevant benefit of examination and  
7 106 treatment methods is always in focus. The German authorities are known to have the toughest evaluation  
8 107 methods in Europe, which are based exclusively on the rules of evidence-based medicine. German decisions  
9 108 often set an example in Europe.

10 109 In Germany the Federal Joint Committee (German: Gemeinsamer Bundesausschuss (G-BA)) is the legislative  
11 110 institution of the German healthcare self-administration system [13]. It issues directives for the benefit catalogue  
12 111 of the statutory health insurance funds and specifies measures for quality assurance in inpatient and outpatient  
13 112 areas of the health care system. In the inpatient sector, the Federal Joint Committee has the right to prohibit  
14 113 medical services for reimbursement, if the treatment method has no (added) benefit and no potential to be a  
15 114 valuable treatment alternative or is harmful for the patients. In the outpatient sector, a method can only be carried  
16 115 out at the expense of the statutory health insurance funds if the G-BA permits this. All decisions are based on the  
17 116 benefit assessment which is usually carried out by the independent scientific Institute for Quality and Efficiency  
18 117 in Health Care (German: Institut für Qualität und Wirtschaftlichkeit im Gesundheitswesen (IQWiG)) [14]. The  
19 118 benefit basically refers to the treatment method used, not to the medical device. Benefit assessment therefore  
20 119 considers all studies that include an adequate comparison of the treatment method with the currently accepted  
21 120 standard, a placebo or no therapy. Thus, it is also possible to carry out a study with more than one medical  
22 121 device.

23 122 In 2004, the G-BA commissioned a benefit assessment on NPWT for the IQWiG in order to support decision-  
24 123 making on reimbursement of NPWT by German statutory health insurance funds in outpatient care. The body of  
25 124 evidence available has been deemed insufficient to clearly prove an additional clinical benefit of NPWT. The  
26 125 large number of prematurely terminated and unpublished trials has also been a reason for concern [15-17]. Since  
27 126 the evidence situation was unchanged in a subsequent evaluation, the G-BA decided in August 2010 that NPWT  
28 127 would not be reimbursable in German outpatient care. In the following years several researchers performed  
29 128 updates or similar systematic literature reviews on the use of NPWT for chronic wounds. The reviews of Ubbink  
30 129 et al in 2008 [18, 19], Gregor et al in 2008 [17], Peinemann and Sauerland in 2011 [20], Dumville et al in 2013  
31 130 [21], an assessment in the home setting [22] and a health technology assessment particularly issued for the  
32 131 evaluation of NPWT for managing diabetic foot ulcers [23] in 2014, as well as the most recent work of Liu et al  
33 132 in 2017 [24] all concluded that although NPWT may have a positive effect, the trials that have been performed

1  
2  
3 133 have methodological flaws and sufficient, unbiased evidence of whether wounds heal better or worse with  
4 134 NPWT than with conventional treatment is still missing. Two trials performed by Armstrong 2005 [25] and  
5  
6 135 Blume 2008 [26] provided a solid basis for planning a RCT that meets national and international quality  
7  
8 136 requirements [15, 20].

9  
10 137 In 2007, the G-BA decided to suspend the method evaluation of NPWT for an initial period of 3 years in order to  
11  
12 138 evaluate the treatment method within a so-called model project. This included the conduct of clinical studies.

13  
14 139 The G-BA defined basic requirements for the overall project. Further quality requirements were based on  
15  
16 140 IQWiG's general methods [27]. This essentially concerned the formulation of a study hypothesis that supports G-  
17  
18 141 BA's overall question if NPWT can be reimbursed in German outpatient care without any limitation; the  
19  
20 142 selection of a comparator that represents the current treatment standard in Germany; and implementation of all  
21  
22 143 measures to ensure a sufficient certainty of results.

23  
24 144 Following the announcement of the G-BA, the German statutory health insurance funds initiated a project  
25  
26 145 through a European tender in which a randomized controlled clinical trial was one part and the diabetic foot  
27  
28 146 ulcer has been chosen to be representative for chronic wounds.



**147 Methods****148 Aim of the study**

149 The aim of our DiaFu-study was to evaluate whether the effectiveness and safety of NPWT is superior to  
150 standard moist wound care (SMWC) in real-life clinical practice. Unlike previous studies, in this health care  
151 research study with a pragmatic approach the question should be answered as to whether the treatment method is  
152 effective and safe when used under routine conditions.

**153 Study Design**

154 The DiaFu-study was a cross-sectoral, randomized controlled clinical superiority trial with blinded analysis of  
155 wound photographs. This German national study was conducted both in hospital departments and outpatient  
156 facilities with a special qualification for diabetic foot care. Study treatment was allowed to be started both in in-  
157 and outpatient care and should be continued outpatient whenever possible. Ethical approval of the Lead Ethical  
158 Committee of the University of Witten/Herdecke has been fully granted without any conditions. More detailed  
159 information on the study design can be found in the study protocol publication that is available open access [28].

**160 Patient and Public Involvement**

161 Patients were not involved in the design, recruitment or conduct of the study. The results of this study will not be  
162 disseminated directly to study participants.

**163 Participants**

164 In order to answer the overall question if NPWT is eligible to be reimbursed in clinical practice without any  
165 limitation, a patient population was included that largely corresponded to clinical routine. In- and exclusion  
166 criteria have been selected based on manufacturers' contraindications and FDA warnings, the necessity to  
167 excluded patients in need of protection and who are unable to give their consent, and the intention to avoid  
168 general study-related influences on the results.

169 Adult patients (age >18 years) with at least 4-week-old chronic diabetic foot ulcers corresponding to Wagner 2 to  
170 4 were screened for study participation by the local investigators. The initially planned minimum ulcer age of 6  
171 weeks was reduced to 4 weeks during the course of the study. The entry criteria of a minimum of 4 weeks ulcer  
172 history has been chosen in order to optimally represent the typical initial contact of patients with the physician.  
173 Written informed consent was obtained from every participant after being informed about all aspects of the trial  
174 and before randomization and any trial-related procedure. Patients estimated to be at risk of non-compliance with  
175 study requirements were excluded. Diabetic foot wounds after adequate wound pretreatment as well as  
176 amputation wounds below the upper ankle joint were eligible for inclusion. Patients with necrotic tissue that  
177 could not be removed by debridement or amputation were excluded. If a sufficient covering of exposed blood

1  
2  
3 178 vessels within or directly surrounding the wound was not possible or the vessels carried an increased risk of  
4 179 bleeding with hemodynamic consequences, the patient was excluded from participating in the study. Outpatients  
5  
6 180 were excluded if receiving anticoagulation therapy or suffering from a high grade impaired clotting function with  
7  
8 181 a heightened risk of bleeding with hemodynamic consequences. The use of NPWT devices on the study wound  
9  
10 182 within six weeks prior to study start represented an exclusion criterion in order to demonstrate a clear therapeutic  
11  
12 183 effect of each treatment arm. As the participating health insurance funds provided integrated care contracts for  
13  
14 184 outpatient NPWT, it was only possible to include patients in the study who were members of a participating  
15  
16 185 health insurance fund.

17 186 Basic data were collected for all patients considered for study participation during screening and have been  
18  
19 187 updated during the randomization visit. No recording of the actual ulcer age was made, as experience has shown  
20  
21 188 that this usually cannot be adequately stated by the patients. Within this healthcare research study, clinical  
22  
23 189 diagnoses rather than surrogate parameters were recorded to describe the patient population. Respective  
24  
25 190 available evidence-based guidelines were referred to in the study protocol. Study sites have been selected based  
26  
27 191 on their qualifications and experience using a pre-study qualification checklist and annual quality reports of the  
28  
29 192 respective institution (if available).

### 30 193 **Randomization and masking**

31 194 Patients were randomly allocated to the treatment arms in a 1:1 ratio using a computer generated list located on a  
32  
33 195 centralized web-based tool. The randomization list consisted of permuted blocks of variable length (4, 6) which  
34  
35 196 were randomly arranged. Patients were stratified by study site and by Wagner-Armstrong stage within each site  
36  
37 197 (<Wagner-Armstrong stage 2C and  $\geq$  Wagner-Armstrong stage 2C). Each registered investigator received  
38  
39 198 individual access to the website, randomization tool and case report forms (CRF). The investigators were  
40  
41 199 responsible for adequately implementing the assigned therapy. Due to the physical differences between the  
42  
43 200 treatment regimens it was not possible to blind either participant or physician to the treatment assignment.  
44  
45 201 Confirmation of wound closure was performed by independent, blinded assessment of wound photographs.

### 46 202 **Procedures**

47 203 All patients underwent an amputation, debridement or at least thorough wound cleansing no longer than six  
48  
49 204 hours before randomization and start of study treatment. Wound bed preparation before study start has been  
50  
51 205 performed according to patient's needs and study wound treatment has been applied according to randomization  
52  
53 206 once the wound bed was ready for the definite treatment in order to achieve complete wound closure. Patients  
54  
55 207 received an extensive examination of overall health status and specific diabetes associated disorders during  
56  
57 208 screening with an update at the randomization visit including diagnostics for peripheral artery disease (PAD)

1  
2  
3 209 using Rutherford's chronic limb ischemia classification [29]. In the study protocol, factors influencing the  
4 210 patient-relevant therapeutic objective of complete wound healing were defined, which were examined with  
5 211 regard to their actual influence within the study. Therapeutic factors such as pressure relief were deliberately not  
6 212 selected, as optimal patient care is assumed, errors in treatment are not the focus of this evaluation, and this type  
7  
8 213 of influencing factors should be evenly distributed to both arms of therapy by randomization. Study therapy  
9 214 could be started either in-hospital or as outpatient and was intended to be continued in outpatient care whenever  
10 215 possible.

11 216 In the intervention group commercially available CE-marked NPWT devices of the manufacturers Kinetic  
12 217 Concepts Incorporated (KCI) and Smith & Nephew were used in the discretion of the clinical investigator  
13 218 according to clinical routine and manufacturer's instructions [28]. Recommendations for use can be found on the  
14 219 manufacturers' websites. Before study start, the participating study sites were allocated to the manufacturers. A  
15 220 direct comparison of the used products was explicitly not planned, since the therapy method and not the medical  
16 221 products are to be evaluated. NPWT as interim therapy needed to be discontinued once the condition of a wound  
17 222 was suitable for closing, either spontaneously by epithelialization or surgically. It was determined in the study  
18 223 protocol that the optimal preparation of the wound for subsequent therapy aiming to achieve complete wound  
19 224 closure requires a granulation area of at least 95 %. Control therapy was defined as any SMWC according to  
20 225 local clinical standards and guidelines [7, 30]. Healthcare providers were obligated to provide patients with best  
21 226 practice. In the control arm it was permitted to apply any local wound treatment standard used in the respective  
22 227 study site that did not have an experimental status or was NPWT. To ensure the best quality of local wound  
23 228 treatment, the study sites were trained for both the intervention arm by the manufacturers and the control arm by  
24 229 the German Society for Wound Healing and Wound Treatment which provided parts of its curriculum and  
25 230 experienced instructors.

26 231 The maximum study treatment time was 16 weeks after randomization. Study visits needed to be performed at  
27 232 week one, three, five, 12 and 16 and included a complete wound examination. Study participants were followed  
28 233 up until 6 months after randomization. The initially planned follow-up period of 12 months was reduced to 6  
29 234 months in the course of the study. The amendment to the study protocol was endorsed by the Ethics Committee  
30 235 and immediately communicated to all participating trial sites.

### 31 236 **Outcomes**

32 237 Our primary outcome comprised the two primary effectiveness endpoints wound closure rate and the time until  
33 238 complete wound closure within a maximum study treatment period of 16 weeks. Complete wound closure was  
34 239 defined as 100% epithelialization of the wound, no drainage, no suture material and no need for wound dressing

240 or adjuvants. Wound closure needed to sustain a minimum of 14 days after the first diagnosis and to be  
241 confirmed by independent blinded observers using wound photographs. Wound closure could also be achieved  
242 by secondary intention or by surgical intervention at any time during the study treatment period.

243 During study planning, possible factors influencing the primary endpoints were identified. Presence and stage of  
244 a diabetic neuropathic osteoarthropathy, severity of the foot wound according to Wagner Armstrong (<stadium  
245 2c and  $\geq$  stadium 2c), diagnosis of a peripheral arterial occlusive disease (paVK) and the stadiums according to  
246 Fontaine and Rutherford classification, presence and stages of chronic venous insufficiency (CVI), presence of  
247 extreme foot deformities and malpositions, untreated or therapy-refractory inflammation in the wound area,  
248 chronic anemia, proven by a hemoglobin value <10 g/dl during screening and after 16 weeks, presence of a heel  
249 necrosis, presence of a lymphedema, infection, infection with resistant strains, glycated hemoglobin (HbA1c)  
250 level, dialysis, treatment with hyperbaric oxygen therapy (HBO) or normothermal therapy, application of  
251 recombinant or autologous growth factors to the study wound, and application of skin or dermal substitutes and  
252 with living cells that produce growth factors. These covariates were analyzed for their effect on the two primary  
253 endpoints. Covariates were excluded from the analysis if the number of missing values was too high or they did  
254 not occur at all.

255 Secondary outcomes were wound closure rate after six months; time until optimal preparation of the wound bed  
256 (a minimum of 95% granulation) within 16 weeks; recurrence within 6 months and amputation within 16 weeks.

257 The initial planned secondary endpoint of time until wound closure within 6 months was abandoned during the  
258 course of the study. It was found that a time-to-event survey was not possible outside the active study treatment  
259 period. This was mostly due to the fact that after this 16-week period weekly study visits were no longer an  
260 obligation and further patient care was no longer bound to the study site. Only one follow-up visit was planned  
261 and carried out after 6 months, in which wound or healing status and recurrences were documented.

262 Minor and major amputations were considered separately, whereas the disarticulation at the midtarsal joint  
263 (Chopart's amputation) was considered still to be minor. Wound size and wound tissue composition (percentage  
264 of granulation tissue, fibrin and necrosis) were monitored at each study visit. Quality of life (QoL) was measured  
265 using the questionnaire Euro Quol 5D (EQ5D) at inclusion, end of the maximum treatment time or end of the  
266 therapy and at the six-month follow-up visit. At each study visit participants were asked to provide their  
267 assessment of wound-associated pain on a numerical rating scale (0 to 10). The incidence of serious adverse  
268 events (SAEs) within six months and the incidence of device-related and wound-related adverse events occurring  
269 within 16 weeks or until wound closure confirmation were safety endpoints of this trial.

## 270 **Statistical analysis**

1  
2  
3 271 Sample size calculation was performed using the expected difference between wound closure rates in both  
4 272 treatment arms based on information extracted from previously published studies. Armstrong and Lavery  
5 273 described a rate of complete wound closure in 56% of patients with NPWT and in 39% of patients in the  
6 274 corresponding control group [25]. Blume showed a rate of complete wound closure in 43% of patients treated  
7 275 with NPWT and 29% of patients in the control group [26]. We assumed a complete wound closure rate of 45%  
8 276 for NPWT and 30% in the SMWC group, resulting in a minimum difference of 15% after a treatment time of 16  
9 277 weeks. Based on a type one error of  $\alpha = 0.05$  and a type two error of  $\beta = 0.2$  (corresponding to a power of 80%) a  
10 278 total sample size of 162 patients per group was calculated. The computer program of Dupont and Plummer was  
11 279 used for sample size calculation [31].

12 280 We performed all analyses based on the intention-to-treat (ITT) population that includes all randomized  
13 281 participants who have a valid baseline and at least one valid post baseline wound assessment. As a secondary  
14 282 approach a per-protocol (PP) analysis has been performed excluding patients with any serious protocol  
15 283 deviations, temporary changes from SMWC to NPWT, permanent wound treatment changes or without valid  
16 284 documentation until wound closure confirmation or end of maximum treatment time (EOMT). Safety data are  
17 285 presented on an 'as treated' basis. Subgroup analysis is presented for small vs big wound subpopulations. There  
18 286 was no interim analysis.

19 287 The superiority hypothesis was tested in parallel for wound closure rate and time to wound closure  
20 288 within 16 weeks. Incidence of complete wound closure was analyzed using a chi-squared test (Fisher's exact test)  
21 289 comparing the two treatment arms. Time to complete wound closure was compared between the two treatment  
22 290 arms using a log-rank test. The method of Bonferroni-Holm was used for adjustment of the  $\alpha$ -error for parallel  
23 291 confirmatory testing of both primary endpoints. Missing values have been incorporated as censored values.  
24 292 Safety and secondary endpoints were analyzed using conventional univariate testing.

25 293 Within a priori planned subgroup analysis the ITT population was divided into a group of small wounds and a  
26 294 group of big wounds based on the wound surface area documented during the randomization visit. Wounds  
27 295 smaller than or equal to the total median wound surface (483 mm<sup>2</sup>) were assigned to the subgroup "small  
28 296 wounds". Patients with wound surface areas larger than the median value were assigned to the subgroup "large  
29 297 wounds". Since no citable scientific definition of a large wound was available at the time of study planning and  
30 298 the clinical experts involved could not make a decision, the median of all wounds was chosen as the criterion for  
31 299 the division into the two subgroups.

32 300 IBM SPSS Statistics (version 23) was used for all analyses.

1  
2  
3 301 This study is registered with ClinicalTrials.gov number NCT01480362 and in the German Clinical Trial  
4 302 Registry, number DRKS00003347.

5  
6 303 A data monitoring committee was formed to oversee overall study performance and safety.

7  
8 304 **Role of the funding source**

9  
10 305 Through a European tender the study was initiated by a consortium of 19 statutory German health insurance  
11 306 funds, which provided integrated care contracts for all study participants and for up to 7000 patients with acute  
12 307 and chronic wounds in Germany; defined basic rules for study design based on the requirements of the German  
13 308 authorities; and provided a critical review of the study protocol and the final report. The study was funded by the  
14 309 manufacturers Kinetic Concepts Incorporated (KCI) and Smith & Nephew (S&N). Both companies provided the  
15 310 NPWT devices and associated consumable supplies in the assigned regions of Germany as well as all necessary  
16 311 support and information about the used material. The manufacturers had no role in study design, data collection,  
17 312 data analysis, data interpretation, or writing of the report. All authors had full access to all of the data (including  
18 313 statistical reports and tables) in the study and take full responsibility for the accuracy of the data analysis.

19  
20  
21  
22  
23  
24  
25  
26 314  
27  
28  
29  
30  
31  
32  
33  
34  
35  
36  
37  
38  
39  
40  
41  
42  
43  
44  
45  
46  
47  
48  
49  
50  
51  
52  
53  
54  
55  
56  
57  
58  
59  
60

315 **Results**

316 Between Dec 23, 2011 and August 12, 2014 386 patients were enrolled and randomly assigned to receive NPWT  
 317 (181) or SMWC (187) in the DiaFu-study (**Error! Reference source not found.**) in overall 40 study sites (that  
 318 recruited minimum 1 patient and maximum 76 patients. A full list of investigator can be found in the appendix.  
 319 13 investigators randomized more than 10 patients. 23 study sites enrolled only between 1 and 4 patients. Most  
 320 of these study sites refused further study participation due lack of time and staff for adequately performing the  
 321 documentation. In the further course of the trial research nurses have been hired by the independent scientific  
 322 institute overseeing the trial in order to support the documentation in the study sites whenever needed.  
 323 Baseline characteristics of the patients in the NPWT-and the SMWC-arm are similar both in the ITT and the PP  
 324 population (**Error! Reference source not found.** and appendix).

| <b>Baseline parameters<br/>(ITT population)</b> | <b>Total<br/>N=345 (100 %)</b> | <b>NPWT<br/>N=171 (49·6%)</b> | <b>SMWC<br/>N=174 (50·4%)</b> |
|-------------------------------------------------|--------------------------------|-------------------------------|-------------------------------|
| Male                                            | 267 of 345 (77·4%)             | 133 of 171 (77·8%)            | 134 of 174(77·0%)             |
| Female                                          | 78 of 345 (22·6%)              | 38 of 171(22·2%)              | 40 of 174(23·0%)              |
| Age (years) (N=345)                             | 67·8 (11·9)                    | 67·6 of 171(12·3)             | 68·1 (11·5)                   |
| Height (N=340) (in cm)                          | 174·1 (12·4)                   | 173·4 (14·6)                  | 174·8 (9·9)                   |
| Weight (N=335) (in kg)                          | 93·3 (22)                      | 92·7 (21·5)                   | 93·8 (22·6)                   |
| Alcohol                                         | N=341                          | N=169                         | N=172                         |
| Occasionally                                    | 157 (46%)                      | 83 (48·5%)                    | 74 (42·3%)                    |
| Chronic                                         | 10 (2·9%)                      | 3 (1·8%)                      | 7 (4·0%)                      |
| No                                              | 174 (51%)                      | 83 (48·5%)                    | 91 (52%)                      |
| Nicotine                                        | N=342                          | N=169                         | N=173                         |
| No                                              | 49 (14·3%)                     | 25 (14·6%)                    | 24 (13·7%)                    |
| Yes                                             | 293 (85·7%)                    | 144 (84·3%)                   | 149 (85·1%)                   |
| Number of years (Mean· SD)                      | 34·8 (13·5)                    | 36·5 (14·9)                   | 33·1 (12·1)                   |
| Packs / day (Mean)                              | 1·1                            | 1·1                           | 1·2                           |
| Drugs                                           | N=341                          | N=169                         | N=172                         |
| Occasionally                                    | 1 (0·3%)                       | 1 (0·6%)                      | 0                             |
| Chronic                                         | 2 (0·6%)                       | 0                             | 2 (1·1%)                      |
| No                                              | 338 (97·7%)                    | 168 (98·2%)                   | 170 (97·1%)                   |
| Requiring dialysis                              | N=343                          | N=170                         | N=173                         |
| Yes                                             | 29 (8·4 %)                     | 15 (8·8%)                     | 14 (8·0%)                     |

|                                                                                                      |                  |                 |                  |
|------------------------------------------------------------------------------------------------------|------------------|-----------------|------------------|
| No                                                                                                   | 314 (90·8%)      | 155 (90·6%)     | 159 (90·9%)      |
| Allergies                                                                                            | N=343            | N=170           | N=173            |
| Yes                                                                                                  | 37 (10·7%)       | 16 (9·4%)       | 21 (12·0%)       |
| No                                                                                                   | 306 (88·4%)      | 154 (90·1%)     | 152 (86·9%)      |
| Subjective assessment of nutritional condition                                                       | N=342            | N=169           | N=173            |
| Well-nourished                                                                                       | 325 (94·2%)      | 162 (94·7%)     | 163 (93·7%)      |
| Moderately malnourished or suspected malnutrition                                                    | 11 (3·2%)        | 4 (2·3%)        | 7 (4%)           |
| Malnourished                                                                                         | 0 (0%)           | 0 (0%)          | 0 (0%)           |
| Peripheral arterial occlusive disease (PAOD)                                                         | N=345            | N=171           | N=174            |
|                                                                                                      | 244 (70·7%)      | 121 (70·8%)     | 123 (70·7·0%)    |
| Without critical limb ischemia                                                                       | 217 (89·3%)      | 106 (87·6%)     | 111 (91·0%)      |
| With critical limb ischemia                                                                          | 26 (10·7%)       | 15 (12·4%)      | 11 (9·0%)        |
| Rutherford classification for chronic limb ischemia (Grade/Category)                                 | N=244            | N=121           | N=123            |
| 0/0 Asymptomatic—no hemodynamically significant occlusive disease                                    | 20 (8·2%)        | 8 (6·6%)        | 12 (9·8%)        |
| I/1 Mild claudication                                                                                | 31 (12·7%)       | 16 (13·2%)      | 15 (12·2%)       |
| I/2 Moderate claudication                                                                            | 20 (8·2%)        | 6 (5·0%)        | 14 (11·4%)       |
| I/3 Severe claudication                                                                              | 5 (2·0%)         | 2 (1·7%)        | 3 (2·4%)         |
| II/4 Ischemic rest pain                                                                              | 1 (0·4%)         | 1 (0·8%)        | 0 (0·0%)         |
| III/5 Minor tissue loss—non-healing ulcer-focal gangrene with diffuse pedal ischemia                 | 163 (66·8%)      | 87 (71·9%)      | 76 (61·8%)       |
| III/6 Major tissue loss—extending above transmetatarsal level- functional foot no longer salvageable | 4 (1·6%)         | 1 (0·8%)        | 3 (2·4%)         |
| Revascularisation before study start                                                                 | 23 of 345 (6·7%) | 9 of 171 (5·3%) | 14 of 174 (8·0%) |
| Percutaneous transluminal angioplasty (PTA)                                                          | 13 of 23 (57%)   | 6 of 9 (67%)    | 7 of 9 (50%)     |
| PTA + Stent                                                                                          | 1 of 23 (4%)     | 0 of 9 (0%)     | 1 of 9 (7%)      |
| Veins-Bypass                                                                                         | 5 of 23 (22%)    | 2 of 9 (22%)    | 3 of 9 (21%)     |
| Polytetrafluoroethylene (PTFE) Bypass                                                                | 1 of 23 (4%)     | 0 of 9 (0%)     | 1 of 9 (7%)      |
| Thromboendarterectomy and patch plastic                                                              | 2 of 23 (9%)     | 0 of 9 (0%)     | 2 of 9 (14%)     |
| Revascularization with influence on the wound                                                        | 22 of 23 (96%)   | 9 of 9 (100%)   | 13 of 14 (93·9%) |
| Sufficient revascularization result                                                                  | 20 of 23 (88%)   | 7 of 9 (78%)    | 13 of 14 (93%)   |



|                                         |              |              |              |
|-----------------------------------------|--------------|--------------|--------------|
| Insufficient revascularization result   | 2 of 23 (9%) | 1 of 9 (11%) | 1 of 14 (7%) |
| Revascularization result not assessable | 1 of 23 (4%) | 1 of 9 (11%) | 0 of 14 (0%) |

325 Table 1: The table shows patient demographics and baseline characteristics of the Per-Protocol (PP) population. Data are N  
 326 (%) and Mean (SD). "N=" is stating the number of patients with actual available information. Findings, diagnoses and  
 327 procedures documented by the investigators are presented.

328  
 329 Wound closure rate in the ITT population was higher in the NPWT arm but this was not significant (p 0.53) as  
 330 the difference in healing rate between the two groups was only four patients (2.5%) (Table 2).

| <b>Time until optimal preparation of the wound bed (min 95 % granulation tissue)</b> | <b>Total<br/>N=183</b> | <b>NPWT<br/>N=100</b> | <b>SMWC<br/>N=83</b>  | <b>p</b>     |
|--------------------------------------------------------------------------------------|------------------------|-----------------------|-----------------------|--------------|
| Mean (SD)                                                                            | 42.7 (39.0)            | 35.6 (34.6)           | 51.4 (42.6)           | <b>0.008</b> |
| Median (IQR)                                                                         | 31 (64)                | 22.0 (48.0)           | 49.0 (53.6)           |              |
| Min - Max                                                                            | 0 - 127                | 0 - 127               | 0 - 115               |              |
| <b>Wound closure rate</b>                                                            | <b>Total<br/>N=345</b> | <b>NPWT<br/>N=171</b> | <b>SMWC<br/>N=174</b> | <b>p</b>     |
| Patients with wound closure within 16 weeks<br>N (%)                                 | 46 (13.3 %)            | 25 (14.6%)            | 21 (12.1%)            | 0.53         |

331 Table 2: The table shows the wound closure rate for the ITT-population. Data show the number (N) of participants available  
 332 for the analysis in total and for both treatment arms. Wound closures within the maximum study treatment time of 16 weeks  
 333 are shown with the number (N) and the percentage (%) of patients.

334  
 335 Wounds treated with NPWT had a slightly lower risk of remaining open than those of patients receiving SMWC  
 336 (RR 0.97 [95% CI: 0.89-1.06]).

337 Beginning in week five the number of study patients with open wounds in the NPWT-arm was lower than in the  
 338 SMWC-arm (Figure 2). There is no significant difference in the wound healing time between the two treatment  
 339 arms (p = 0.244, Log Rank Test). Since the cumulative number of patients with open wounds was more than  
 340 70% after 16 weeks, we were not able to calculate medians for time to wound closure.

341 Of the a priori defined factors potentially influencing wound closure nine factors needed to be excluded because  
 342 the number of missing values was too high or they were never documented by the investigators. The covariate  
 343 peripheral arterial occlusive disease had significant influence on the time until wound closure (p 0.026) and  
 344 infection had a significant influence on the wound healing rate (p 0.012). However, both influencing factors  
 345 were almost evenly distributed over both study arms by randomization. Thus the group comparison has not been  
 346 influenced by these confounders.

347 After 6 months the wound closure rate was higher in the SMWC- than in the NPWT-arm (36 of 174 [20·7 %] vs  
348 24 of 171 [14· 0 %]), but the difference was not significant (p 0·12).

349 The time until optimal preparation of the wound for further treatment to achieve a complete epithelization (min  
350 95 % granulation tissue) was significantly shorter for patients treated with NPWT (p 0·021) (Table 2).

| <b>Time until optimal preparation of the wound bed (min 95 % granulation tissue)</b> | <b>Total<br/>N=183</b> | <b>NPWT<br/>N=100</b> | <b>SMWC<br/>N=83</b>  | <b>p</b>     |
|--------------------------------------------------------------------------------------|------------------------|-----------------------|-----------------------|--------------|
| Mean (SD)                                                                            | 42·7 (39·0)            | 35·6 (34·6)           | 51·4 (42·6)           | <b>0·008</b> |
| Median (IQR)                                                                         | 31 (64)                | 22·0 (48·0)           | 49·0 (53·6)           |              |
| Min - Max                                                                            | 0 - 127                | 0 - 127               | 0 - 115               |              |
| <b>Wound closure rate</b>                                                            | <b>Total<br/>N=345</b> | <b>NPWT<br/>N=171</b> | <b>SMWC<br/>N=174</b> | <b>p</b>     |
| Patients with wound closure within 16 weeks<br>N (%)                                 | 46 (13·3 %)            | 25 (14·6%)            | 21 (12·1%)            | 0·53         |

351 Table 3: The table shows time until optimal preparation of the wound for further treatment (min 95 % granulation tissue for  
352 the ITT-population. Data show the number (N) of participants available for the analysis in total and for both treatment arms.  
353 Time until optimal preparation of the wound is described with mean (SD); median (IQR); and minimum (min) and maximum  
354 (max).

356 In the ITT-population wound surface area and wound volume decreased continuously during the study treatment  
357 time of 16 weeks in both treatment arms. The results of the blinded photo analysis using the Wound Healing  
358 Analyzing Tool (W.H.A.T.) were smaller than the values documented by the clinical investigators. In the  
359 NPWT-arm values for the wound surface area decreased faster during the beginning of the treatment time, but  
360 aligned with the values of the SMWC-arm after week five. Starting from a similar wound volume, values in the  
361 NPWT-arm decreased faster and remained consistently smaller until the end of the treatment period than those in  
362 the SMWC-arm. In the NPWT-arm granulation tissue increased faster at the beginning of the treatment period  
363 until week 8 and aligned with the measures in the SMWC-arm at the end of the treatment time. Values for fibrin  
364 were low and decreased slightly faster in the NPWT-arm than in the SMWC arm. The value for necrotic tissue  
365 was very low and did not differ relevantly between the treatment arms. The results of the W.H.A.T. evaluation  
366 deviate markedly from the values documented by the investigators and show the opposite course for granulation  
367 tissue and fibrin. In the PP-population wound surface area started at smaller baseline levels and decreased faster  
368 than in the ITT-population whereas the measures were smaller in the NPWT arm than in the SMWC arm.  
369 Wound volume started higher in the NPWT arm and ended at similar levels for the treatment arms after  
370 decreasing continuously during the treatment period. This effect was stronger in the SMWC arm. Wound volume

measures were lower in the PP-population than in the ITT-population. Wound tissues had a similar course over time like in the ITT population but showed higher values for granulation as well as lower values for fibrin and necrosis in the PP population. Detailed information about the course of wound surface area, volume and composition of tissues for both study populations can be found in the respective tables in the appendix.

No recurrences occurred during the study treatment time of 16 weeks. Patients treated with NPWT were more than twice as likely to get recurrences as patients treated with SMWC (RR 2.24 [95%CI: 0.80-6.31]), but the overall number of 17 recurrences in 16 patients was very low. 11 recurrences (6.4 %) occurred in the 171 patients in the NPWT arm. One patient had two recurrences. In the SMWC arm, five of 174 patients (2.9 %) had a recurrence. The difference is not significant (p 0.131).

A total of 102 amputations or resections were performed in 71 patients. There were 45 amputations in 35 (20.5%) patients in the NPWT group and 57 amputations in 36 (20.7 %) patients in the control group. There is no significant difference in the number of patients with amputation or resection (p 1.00) or the overall number of performed interventions (p 0.89) between NPWT and SMWC arm. Patients treated with NPWT have a slightly lower risk of undergoing an amputation or resection than patients treated with SMWC (RR: 0.99 [95%CI: 0.65-1.50]). A total of 69 patients (20 %) underwent a minor amputation (NPWT 33 [19.3 %] SMWC 36 [20.7 %], p 0.79). Two patients in the NPWT arm and no patient of the SMWC arm underwent a major amputation (p 0.25). Overall, pain levels were very low and decreased further during the study treatment time. The values hardly differ between the treatment arms at any observation time point. A table with pain levels can be found in the appendix.

At baseline Quality of life (EQ5D) had significant limitations in both treatment arms. Patients reaching the end of treatment within 16 weeks showed improved EQ5D levels in the NPWT arm and in the SMWC arm. Similar results have been found for patients who reached the end of the maximum treatment time without successful end of therapy. At the follow-up time after 6-months all patients still show increased EQ5D levels in both treatment arms and both study populations. A table with detailed results for the EQ5D is provided in the appendix.

269 adverse events (AE) (NPWT 167; SMWC 102) occurred during the active study treatment period of 112 days. For 96 (56.1%) patients in the NPWT group and 72 patients (41.4%) in the SMWC group at least one adverse event has been documented (p 0.007) but only 16 (10.2%) of the AEs in the NPWT group were decided by the investigators to have a definite relation to the medical device. A total of 163 AEs occurring within the study observation period of 6 months were classified as serious adverse events (SAE) in the opinion of the investigators (NPWT 87, SMWC 76). In the NPWT arm, 63 patients (36.8 %) had at least one documented SAE. 45 patients had one and 18 patients had two or more SAEs. In the SMWC arm, 58 patients (33.3%) had a

402 minimum of one SAE (45 patients with one SAE; 13 patients with two or more SAEs). The difference between  
 403 the treatment arms was not significant (p 0.50). None of the SAEs in the NPWT group were documented as  
 404 definitely or possibly related to the medical device by investigators. In one case in the SMWC group the  
 405 investigator documented a definite relationship between the SAE and SMWC. In one case the investigator  
 406 documented a possible relationship to SMWC in the NPWT group. Table 3 gives a detailed overview on the AEs  
 407 documented within the study treatment time of 112 days.

| <b>Adverse Events (AE)</b><br><b>N=269</b>         | <b>NPWT</b><br><b>N=167</b> | <b>SMWC</b><br><b>N=102</b> |
|----------------------------------------------------|-----------------------------|-----------------------------|
| Day of occurrence (N)                              | 167                         | 102                         |
| Mean (SD)                                          | 37.5 (28.6)                 | 42.7 (29.2)                 |
| Median (IQR)                                       | 30.0 (40.0)                 | 38.0 (50.0)                 |
| Duration in days (N)                               | 157                         | 97                          |
| Mean (SD)                                          | 19.7 (29.0)                 | 25.3 (38.6)                 |
| Median (IQR)                                       | 10.0 (20.0)                 | 13.0 (22.0)                 |
| Severity (N)                                       | 161                         | 102                         |
| Mild                                               | 64 (39.8%)                  | 24 (23.5%)                  |
| Moderate                                           | 54 (33.5%)                  | 38 (37.3%)                  |
| Severe                                             | 43 (26.7%)                  | 40 (39.2%)                  |
| AE expected / unexpected (N)                       | 159                         | 100                         |
| Expected                                           | 52 (32.7%)                  | 27 (27.0%)                  |
| Unexpected                                         | 107 (67.3%)                 | 73 (73.0%)                  |
| Relationship to the medical device (N)             | 157                         | 100                         |
| Yes                                                | 16 (10.2%)                  | 0 (0%)                      |
| Possible                                           | 11 (7.0%)                   | 2 (2.0%)*                   |
| No                                                 | 117 (74.5%)                 | 94 (94.0%)                  |
| Not assessable                                     | 13 (8.3%)                   | 4 (4.0%)                    |
| * No treatment change to NPWT has been documented. |                             |                             |
| Relationship to SMWC (N)                           | 110                         | 75                          |
| Yes                                                | 0 (0%)                      | 2 (2.7%)                    |
| Possible                                           | 5 (4.5%)                    | 0 (0%)                      |
| No                                                 | 96 (87.3%)                  | 67 (89.3%)                  |
| Not assessable                                     | 9 (8.2%)                    | 6 (8.0%)                    |
| Relationship to treatment procedure (N)            | 148                         | 96                          |
| Yes                                                | 6 (4.1%)                    | 4 (4.2%)                    |
| Possible                                           | 15 (10.1%)                  | 2 (2.1%)                    |
| No                                                 | 111 (75.0%)                 | 80 (83.3%)                  |
| Not assessable                                     | 16 (10.8%)                  | 10 (10.4%)                  |

|                                   |                   |                  |
|-----------------------------------|-------------------|------------------|
| Action taken (N)                  | 146               | 94               |
| No                                | 23 (15.8%)        | 23 (24.5%)       |
| Yes                               | 123 (84.2%)       | 71 (75.5%)       |
| Cessation of therapy              | 10 of 123 (8.1%)  | 0 of 71 (0%)     |
| Temporary interruption of therapy | 28 of 123 (22.8%) | 2 of 71 (2.8%)   |
| Adaptation of therapy / treatment | 52 of 123 (42.3%) | 48 of 71 (67.6%) |
| Other                             | 33 of 123 (26.8%) | 21 of 71 (29.6%) |
| Outcome (N)                       | 148               | 96               |
| Fixed without consequences        | 72 (48.6%)        | 43 (44.8%)       |
| Condition improved                | 32 (21.6%)        | 26 (27.1%)       |
| Fixed with consequences           | 22 (14.9%)        | 12 (12.5%)       |
| Not fixed                         | 4 (2.7%)          | 3 (3.1%)         |
| Death                             | 9 (6.1%)          | 6 (6.3%)         |
| Unknown                           | 9 (6.1%)          | 6 (6.3%)         |

408 Table 1: The table shows the adverse events in the active study treatment time of 112 days after randomization. Data are N  
 409 (%), Mean (SD), and Median (IQR). "N=" is stating the number of patients with actual available information.

410  
 411 In the NPWT arm 48.5% (N=83) of patients have small wounds and 51.5% (N=88) of patients have large  
 412 wounds. The SMWC arm has 51.7% (N=90) small wounds and 48.3% (N=84) big wounds. The differences  
 413 between the treatment arms are not significant.

414 An overview of the measures for small and big wounds and detailed results for this subgroup analysis can be  
 415 found in the appendix. In the subgroup of big wounds, wound closure rate was significantly higher in the NPWT  
 416 arm within 16 weeks (p 0.08). Patients with big wounds have a lower risk of not achieving wound closure within  
 417 16 weeks when treated with NPWT (RR 0.91 [95%CI: 0.82-1.0]). In the subgroup of big wounds a significantly  
 418 faster wound closure was achieved in the NPWT arm (p 0.027) (Figure 3). Time until complete, sustained and  
 419 verified wound closure was not significantly different between the treatment arms in the subgroup of small  
 420 wounds (Figure 4).

421 In the subgroup of small wounds the time to reach 95 % granulation tissue was significantly shorter for the  
 422 patients treated with NPWT (p 0.005). Time until optimal wound bed preparation was shorter in the NPWT arm  
 423 in the subgroup of big wounds, but did not significantly differ to the result of the SMWC arm (p 0.27). There are  
 424 no relevant or significant differences in the overall number of patients with amputation or resection between the  
 425 treatment arms in both subgroups. Both major amputations were performed in patients with big wounds treated  
 426 with NPWT. Due to the low overall number of recurrences (N=16) we were not able to perform a subgroup  
 427 analysis for this outcome parameter.

1  
2  
3 428 In the PP-population patients treated with NPWT showed a 14.5 % higher wound closure rate within 16 weeks  
4 429 than patients treated with SMWC (Appendix), but the difference was not significant ( $p=0.053$ ). Wounds treated  
5 430 with NPWT had a lower risk of remaining open after 16 weeks (RR 0.82 [95%CI: 0.66-1.03]) than wounds  
6 431 treated with SMWC. Time to wound closure in the NPWT arm was significantly shorter ( $p=0.004$ ) (Figure 5).  
7  
8 432 After 6 months, wound closure rate in the SMWC-arm was higher than in the NPWT-arm, but the difference was  
9 433 not significant ( $p=0.84$ ). As in the ITT population, optimal wound bed preparation was achieved significantly  
10 434 faster in patients receiving NPWT ( $p<0.001$ ). Patients receiving NPWT had a higher risk of recurrence than  
11 435 those in the control group (RR 1.50 [95%CI: 0.37-6.01]), however there was no significant difference between  
12 436 the treatment arms regarding the total number of recurrences ( $p=0.38$ ) or the number of patients with recurrences  
13 437 ( $p=0.69$ ). 9 patients in the NPWT group and 21 (21.4%) patients in the SMWC group had an amputation or  
14 438 resection (NPWT RR 1.07 [95%CI: 0.53-2.15]). Neither the number of patients with amputations or resections  
15 439 (NPWT 9 (20.5%) SMWC 21 (21.4%)  $p=0.83$ ) nor the number of amputations or resections performed (NPWT  
16 440 11 SMWC 28  $p=0.86$ ) differ significantly between the treatment arms. No major amputations were performed in  
17 441 the PP population. Like in the ITT population, pain levels were very low, showing no relevant difference  
18 442 between the treatment arms, and further decreased during the study treatment period. In the PP-population EQ5D  
19 443 values are higher than in the ITT population during screening, but still show that all patients have significant  
20 444 problems. In the NPWT arm QoL measures are similar to those of the SMWC arm for patients reaching end of  
21 445 maximum treatment time before end of therapy. EQ5D shows higher values for patients reaching the end of  
22 446 therapy during the study treatment time of 16 weeks. Detailed results for the PP population can be found in the  
23 447 appendix.  
24  
25 448 29 (17.0%) patients in the NPWT group had a temporary therapy change to SMWC (mean duration  $20.5 \pm 21.6$   
26 449 days). In the SMWC group, 17 (9.8%) patients had a temporary therapy change to NPWT (mean duration  $28.9 \pm$   
27 450  $21.6$  days). For only 2 of the 29 NPWT patients (6.9%) with a temporary therapy change to SMWC the wound  
28 451 closure was achieved within 16 weeks, whereas 16.2% (23 von 142) of the wounds of the NPWT patients  
29 452 without therapy change were completely closed.  
30  
31 453 A total of 57.3% (98 of 171) of the patients randomized to NPWT completed treatment before achieving a  
32 454 granulation surface of the wound of at least 95%. Significantly fewer patients with this premature end of NPWT  
33 455 (4.7%,  $N=8$ ) achieved a complete wound closure than patients with no premature end of therapy (9.9,  $N=17$ ) ( $p$   
34 456  $=0.008$ ). Mean NPWT-duration until premature end of therapy was 28.5 days (SD 24.1), while a mean  
35 457 granulation area of 59.6% (SD 30.5) was achieved.

1  
2  
3 458 For 131 patients (76· 6 %) in the NPWT arm less than the required three dressing changes per week were  
4 459 documented. 19 patients (14· 5 %) with this protocol violation achieved a complete wound closure. Six (15·4%)  
5 460 of the 39 NPWT patients who received at least 3 therapy changes per week achieved a complete wound closure.  
6  
7  
8 461 In the electronic Case Report Forms (eCRF) a wound closure was documented for 96 patients (NPWT 56 of 171;  
9 462 SMWC 40 of 174), but only for 46 patients (NPWT 25; SMWC 21) all criteria for a complete, verified and  
10 463 sustained wound closure have been met. For the wound closure visit seven wound photographs (NPWT 7;  
11 464 SMWC 0) and for the wound closure confirmation visit four photographs (NPWT 3; SMWC 1) were missing. In  
12 465 addition, two of the existing wound photographs for the wound closure (NPWT 0; SMWC 2) and two  
13 466 photographs for the wound closure confirmation (NPWT 1, SMWC 3) were not assessable by the blinded  
14 467 observers due to serious quality issues. Furthermore 23 (NPWT 15; SMWC 8) existing and assessable wound  
15 468 photographs were not able to confirm the wound closure and 3 (NPWT 1; SMWC 2) photographs were not able  
16 469 to confirm the wound closure after 14 days.  
17  
18  
19  
20  
21  
22  
23  
24  
25  
26  
27  
28  
29  
30  
31  
32  
33  
34  
35  
36  
37  
38  
39  
40  
41  
42  
43  
44  
45  
46  
47  
48  
49  
50  
51  
52  
53  
54  
55  
56  
57  
58  
59  
60



**470 Discussion**

471 In the DiaFu-study wound closure rates were higher in the NPWT group but did not significantly differ from  
472 those in the SMWC group, although optimal preparation of the wound bed (95% granulation tissue) was  
473 achieved significantly earlier when using NPWT in both populations. Time to wound healing in the NPWT  
474 group is lower than in the SMWC group while the difference between the treatment groups becomes statistically  
475 significant only in the PP population. Thus, with this study we were not able to confirm our hypothesis that  
476 wound closure can be achieved more often and faster with NPWT than with SMWC when used in the complex  
477 treatment process for diabetic foot ulcers in clinical practice. Findings of previous RCTs that showed a  
478 significant superiority in healing when using NPWT on amputation and chronic wounds [25, 26] could not be  
479 confirmed by this trial. We were able to show that although significantly more adverse events have been  
480 documented in the NPWT group only a small number of these events were related to the medical device  
481 according to the investigator's assessment. Mortality rates were very low in both groups and there was no  
482 significant difference between the treatment groups regarding amputations and resections performed during the  
483 study. Only two major amputations have been performed in patients with big wounds treated with NPWT. None  
484 of the two treatments resulted in an additional impairment of the patients' quality of life during study treatment  
485 time or follow up. Time until complete wound closure was significantly shorter with NPWT than with SMWC in  
486 the subgroup of big wounds, which indicates that NPWT has the potential to be valuable treatment method for  
487 this kind of wounds.

488 The DiaFu-study was designed to evaluate effectiveness and safety of NPWT for chronic diabetic foot wounds in  
489 real-life clinical practice while avoiding any bias that have been described by several systematic reviews [15-18,  
490 20, 21, 24, 32]. Methods against bias have been implemented successfully, but within this study shortcomings in  
491 documentation quality negatively impact the results.

492 None of the previous studies examined the influence of therapy adherence and target-oriented therapy  
493 application on the clinical outcome. Our study is the first to show that unauthorized temporary therapy changes  
494 and premature therapy cessation have a strong or significant impact on reaching the patient relevant therapy  
495 outcome complete wound healing. Thus, an important finding of the DiaFu-study is that if NPWT is not used  
496 with a clear focus and applied consistently under consideration of all prescriptions of the authorities and the  
497 manufacturers, the desired treatment outcome will not be reached.

498 Not addressing and analyzing all factors influencing the overall treatment outcome like targeted pressure relief,  
499 infection control and adequate treatment of the underlying disease may be seen as a weakness of this health care  
500 research study. Study sites have been selected based on a self-disclosure by means of a qualification checklist



1  
2  
3 501 and cross checks using quality reports. This ensured that all prerequisites were met for guideline-compliant  
4 502 patient care. Nevertheless, even in the application of NPWT there were deviations from the standards. Anyway,  
5  
6 503 questioning the quality of investigators' treatment was not the main focus of this health services research trial.  
7  
8 504 Evaluating the individual treatment quality within a single RCT is neither feasible nor effective.

9  
10 505 Other than previous studies the DiaFu-study evaluated the effectiveness of NPWT most closely to real-life using  
11  
12 506 a patient population as diverse as in clinical practice. The DiaFu-study therefore included patients with chronic  
13  
14 507 diabetic foot ulcers, regardless of whether a simple wound cleansing, tissue debridement or even amputation was  
15  
16 508 necessary prior to application of wound therapy targeted to achieve complete wound closure. Thus, results can  
17  
18 509 easier be generalized and applied in routine practice settings, but the problems of the clinical routine also affect  
19  
20 510 data quality.

21  
22 511 Some of the previous studies did choose granulation tissue formation for primary outcome. Wound bed  
23  
24 512 preparation and granulation tissue formation are important prerequisites for wound healing, but the selection of a  
25  
26 513 patient-relevant primary endpoint and the implementation of adequate measures against bias as required by the  
27  
28 514 German authorities have been a priority during planning. Preparing the wound bed significantly faster with  
29  
30 515 NPWT is an important result for the therapeutic approach, but is not a proof of effectiveness and cannot serve as  
31  
32 516 a basis for the benefit assessment of NPWT. Thus, complete wound healing needed to be chosen to be the  
33  
34 517 primary outcome rather than the evaluation of the functionality within in the purpose of the evaluated medical  
35  
36 518 device, which is still part of a complex treatment process.

37  
38 519 In order to support the decision making process of the German G-BA on general reimbursement of NPWT in  
39  
40 520 German outpatient care the DiaFu-study was conducted with a population according to the clinical routine  
41  
42 521 without excluding certain patient groups; with therapy application in the discretion of the attending physician;  
43  
44 522 and with evaluation of patient relevant outcome. Within this setting we were not able to show a significant  
45  
46 523 superiority of NPWT for achieving wound closure, but despite all limitations NPWT showed a significant  
47  
48 524 superiority in wound bed preparation. This indicates that NPWT works according to its intended use and has at  
49  
50 525 least a potential to be a valuable treatment alternative. Anyway, in the complex treatment process of the diabetic  
51  
52 526 wound a satisfactory rate of wound healing was reached with neither NPWT or with SMWC.

53  
54 527

## 55 528 **Conclusions**

56  
57 529 NPWT is not superior to SMWC when evaluated in German real-life clinical practice. Missing compliance with  
58  
59 530 therapy guidelines and poor documentation quality lead to restrictions in achieving the patient-relevant endpoint  
60  
531 complete wound closure and prevent a clear proof of effectiveness. The question if NPWT is superior to SMWC

1  
2  
3 532 for treating diabetic foot wounds remains unanswered due to the limitations of the DiaFu-study. An overall low  
4 533 number of wound closures indicate problems with the overall treatment quality. The results of the PP-population  
5  
6 534 suggest that without the negative impact of premature treatment cessation, temporary changes of the randomized  
7  
8 535 therapy and partly incomplete documentation, NPWT may be more effective for treating diabetic foot wounds  
9  
10 536 than SMWC. NPWT should be evaluated again after implementation of a sufficient, well-considered and widely-  
11  
12 537 accepted concept for quality control. The simple provision of information on existing standards and guidelines  
13  
14 538 seems to be not sufficient. Control mechanisms must be implemented. An adequate quality assurance system  
15  
16 539 must be established in Germany. In a future health care research study the treatment outcome before and after the  
17  
18 540 implementation of these quality measures should be evaluated, for which the results of this trial may serve as a  
19  
20 541 basis. Practitioners worldwide should review their processes with regard to the problems described here.  
21  
22  
23  
24  
25  
26  
27  
28  
29  
30  
31  
32  
33  
34  
35  
36  
37  
38  
39  
40  
41  
42  
43  
44  
45  
46  
47  
48  
49  
50  
51  
52  
53  
54  
55  
56  
57  
58  
59  
60

1  
2  
3 543 **Ethics approval and consent to participate**

4 544 Ethical approval of the main ethical committee (EC): Ethical Committee of the University of Witten-Herdecke,  
5  
6 545 has been fully granted without any conditions. Due to performing the trial according to § 23b MPG (German  
7  
8 546 Medical Device Act), participating study sites in Germany only received a consultation for the main clinical  
9  
10 547 investigator according to professional law by the respective EC. All investigators have been fully approved by  
11  
12 548 the respective ECs. An evaluation of the study's content by ECs of participating study sites in Germany was not  
13  
14 549 applicable. All study participants gave written informed consent prior to randomization and any trial related  
15  
16 550 procedure.

17 551

18  
19 552 **Data sharing**

20 553 The datasets used and/or analyzed during the current study are available from the corresponding author on  
21  
22 554 reasonable request. Datasets are available in German language.

23  
24 555

25  
26 556 **Competing interests**

27  
28 557 All authors have completed the ICMJE uniform disclosure form at [www.icmje.org/doi\\_disclosure.pdf](http://www.icmje.org/doi_disclosure.pdf) and  
29  
30 558 declare:

31 559 The German statutory health insurance companies commissioned the Witten/Herdecke University (UW/H) to  
32  
33 560 plan, conduct, analyze and publish the study. Dörthe Seidel is an employee of the UW/H. The study has been  
34  
35 561 financed by the manufacturers KCI (Acclity) and Smith&Nephew. Dörthe Seidel received a consulting fee for  
36  
37 562 the presentation of the study during an event organized by the manufacturer Hartmann. During study planning  
38  
39 563 and conduct Edmund Neugebauer was an employee of the UW/H. He was the director of the IFOM.

40 564 The clinical investigators Martin Storck, Holger Lawall, Gernold Wozniak, Peter Maukner, Dirk Hochlenert,  
41  
42 565 Walter Wetzel-Roth, Klemens Sondern, Matthias Hahn, Gerhard Rothenaicher, Thomas Krönert and Karl Zink  
43  
44 566 received a case fee of 1000 € for each patient included in the DiaFu-study in order to compensate for the  
45  
46 567 additional organizational and especially the documentation effort during trial conduct. Furthermore all  
47  
48 568 investigators received compensation for travelling to the investigator meetings. The institutions of the  
49  
50 569 investigators used integrated care contracts for NPWT during study conduct in order to provide best practice for  
51  
52 570 the study participants during outpatient care.

53 571 Gernold Wozniak and Walter Wetzel-Roth are members of the scientific advisory board of the manufacturer  
54  
55 572 Kinetic Concepts Incorporated (KCI) (now Acclity).

56  
57 573

1  
2  
3 574 **Funding**

4 575 Through a European tender the study was initiated by a consortium of 19 statutory German health insurance  
5  
6 576 funds, which provided integrated care contracts for all study participants and for up to 7000 patients with acute  
7  
8 577 and chronic wounds in Germany; defined basic rules for study design based on the requirements of the German  
9  
10 578 authorities; and provided a critical review of the study protocol and the final report. The study was funded by the  
11  
12 579 manufacturers Kinetic Concepts Incorporated (KCI) and Smith & Nephew (S&N). Both companies provided the  
13  
14 580 NPWT devices and associated consumable supplies in the assigned regions of Germany as well as all necessary  
15  
16 581 support and information about the used material. The manufacturers had no role in study design, data collection,  
17  
18 582 data analysis, data interpretation, or writing of the report. All authors had full access to all of the data (including  
19  
20 583 statistical reports and tables) in the study and take full responsibility for the accuracy of the data analysis.

21 584

22 585 **Authors' contributions**

23  
24 586 Dörthe Seidel was the principal coordinating investigator. She conceived the study, reviewed the scientific  
25  
26 587 literature, and was responsible for study design, data analysis, data interpretation, writing and reviewing of the  
27  
28 588 report. She is the lead author and takes overall responsibility for this report. She affirms that the manuscript is an  
29  
30 589 honest, accurate, and transparent account of the study being reported; that no important aspects of the study have  
31  
32 590 been omitted; and that any discrepancies from the study as originally planned (and, if relevant, registered) have  
33  
34 591 been explained.

35 592 Martin Storck and Holger Lawall were study investigators and contributed to study design, data collection and  
36  
37 593 interpretation, and reviewed the report.

38 594 Gernold Wozniak, Peter Maukner, Walter Wetzel-Roth and Dirk Hochlenert were study investigators and  
39  
40 595 contributed to data collection and data interpretation and reviewed the report.

41  
42 596 Klemens Sondern, Matthias Hahn, Gerhard Rothenaicher, Thomas Krönert and Karl Zink were study  
43  
44 597 investigators and contributed to data collection and reviewed the report.

45  
46 598 Edmund Neugebauer contributed to study design and data interpretation and reviewed the report.

47 599 All authors approved the final version of the report.

48  
49 600

50  
51 601 **Acknowledgements**

52 602 The authors thank all investigators, nurses, patients and partners for supporting the study.

53 603 At least one patient was included in the following facilities: HSK - Dr. Horst Schmidt Kliniken GmbH Klinik für  
54  
55 604 Gefäßchirurgie Ludwig-Erhard-Straße 100 65199 Wiesbaden; Asklepios Westklinikum Hamburg Zentrum für

- 1  
2  
3 605 Gefäßmedizin Suurheid 20 22559 Hamburg; Knappschafts Krankenhaus Bottrop Gefäßchirurgische Klinik  
4  
5 606 Osterfelderstraße 157 46242 Bottrop; Städtisches Klinikum Karlsruhe Klinik für Gefäß- und Thoraxchirurgie  
6  
7 607 Moltkestraße 90 76133 Karlsruhe; Gemeinschaftspraxis Schlotmann-Hochlenert-Zavaleta-Haberstock  
8  
9 608 Merheimer Straße 217 50733 Köln; Klinikum Döbeln Abt. für Gefäßchirurgie Sörmitzer Straße 10 04720  
10  
11 609 Döbeln; Klinikum Bielefeld Mitte Klinik für Allgemeine Innere Medizin Teutoburger Straße 50 33604 Bielefeld;  
12  
13 610 Klinikum Frankfurt/Oder Klinik für Gefäßchirurgie Müllroser Chaussee 7 15236 Frankfurt/Oder; Weißeritztal-  
14  
15 611 Kliniken GmbH Medizinische Klinik III Bürgerstraße 7 01705 Freital; Krankenhaus Porz am Rhein Klinik für  
16  
17 612 Gefäßchirurgie Urbacher Weg 19 51149 Köln; St. Remigius Krankenhaus Opladen Innere Medizin An St.  
18  
19 613 Remigius 26 51379 Leverkusen; Marien Hospital Dortmund-Hombruch Klinik für Innere Medizin/Diabetologie  
20  
21 614 Gablonzstraße 9 44225 Dortmund; Zentrum für Chirurgie Klinik für Gefäß- und Endovascularchirurgie  
22  
23 615 Theodor-Stern-Kai 7, Haus 23C/EG 60590 Frankfurt am Main; Facharzt für Chirurgie Thorax-  
24  
25 616 Kardiovaskularchirurgie Hindenburgstraße 1 86807 Buchloe; Helfenstein Klinik Geisslingen Allgemein- und  
26  
27 617 Viszeralchirurgie Eybstraße 16 73312 Geislingen/Steige; Paracelsus-Klinik am Silbersee Wundzentrum  
28  
29 618 Hannover Oertzeweg 24 30851 Langenhagen; Klinikum Darmstadt Chirurgische Klinik III Grafenstraße 9 64283  
30  
31 619 Darmstadt; Ortenau Klinikum Offenburg-Ebertplatz Klinik für Allgemein-, Viszeral- und Gefäßchirurgie  
32  
33 620 Ebertplatz 12 77654 Offenburg; Thüringen-Kliniken "Georgius Agricola" GmbH Klinik für Gefäßchirurgie  
34  
35 621 Rainweg 68 07318 Saalfeld; Klinikum Dorothea Christiane Erxleben GmbH Klinik für Allgemein-, Viszeral-  
36  
37 622 und Gefäßchirurgie Ditfurter Weg 24 06484 Quedlinburg; Franziskus-Krankenhaus Berlin Abt. für Innere  
38  
39 623 Medizin Budapester Straße 15-19 10787 Berlin; Hegau-Bodensee Klinikum Radolfzell (HBK) Klinik für Innere  
40  
41 624 Medizin Hausherrenstraße 12 78315 Radolfzell; Diabetologische Schwerpunktpraxis Dr. med. Hansjörg Mühlen  
42  
43 625 & Partner Ruhrorter Straße 195 47119 Duisburg; Kliniken Maria Hilf Mönchengladbach Klinik für  
44  
45 626 Gefäßchirurgie und Angiologie Sandradstraße 43 41061 Mönchengladbach; Städtisches Klinikum  
46  
47 627 München/Bogenhausen Klinik für Endokrinologie, Diabetologie und Angiologie Engelschalkingerstraße 77  
48  
49 628 81925 München; Gerhard Rothenaicher Facharzt für Chirurgie Cosimastraße 2 81927 München; Bürgerhospital  
50  
51 629 Frankfurt am Main Interdisziplinäres Zentrum Diabetischer Fuß (DDG) Nibelungenallee 37- 41 60318 Frankfurt  
52  
53 630 am Main; Gemeinschaftspraxis für Chirurgie und Gefäßmedizin Drs. Alter/Pourhassan/Heim Klosterstraße 12  
54  
55 631 46145 Oberhausen; Ev. KH Königin Elisabeth Herzberge gGmbH Abt. für Kardiologie, Angiologie und  
56  
57 632 Diabetologie Herzbergstraße 79 10365 Berlin; Städtisches Klinikum Neunkirchen gGmbH Abt. für  
58  
59 633 Gefäßchirurgie & Phlebologie Brunnenstraße 20 66538 Neunkirchen; Westküstenklinikum Heide Klinik für  
60  
634 Viszeral- und Gefäßchirurgie Esmarchstraße 50 25746 Heide/Holstein; Chir. Praxisgemeinschaft am  
635 Bayenthalgürtel Praxis Dr. med. Gerald Engels Bayenthalgürtel 45 50968 Köln; Malteser Krankenhaus – St.

1  
2  
3 636 Franziskus-Hospital Medizinische Klinik I, Abt. für Diabetologie Waldstraße 17 24939 Flensburg; St.  
4  
5 637 Marienkrankenhaus Siegen gGmbH Klinik für Gastroenterologie Kampenstraße 51 57072 Siegen; Krankenhaus  
6  
7 638 Bietigheim Klinik für Innere Medizin, Kardiologie, Endokrinologie, Diabetologie und Internistische  
8  
9 639 Intensivmedizin Riedstraße 12 74321 Bietigheim-Bissingen; Asklepios Kliniken Harburg Eißendorfer Pferdeweg  
10  
11 640 52 21075 Hamburg; Diabetologikum Ludwigshafen Diabetes-Schwerpunktpraxis Ludwigsplatz 9 67059  
12  
13 641 Ludwigshafen; Mariannen-Hospital Werl Abt. für Chirurgie Unnaer Straße 15 59457 Werl; Diabetes Klinik  
14  
15 642 GmbH & Co KG Theodor-Klotzbücher-Straße 12 97980 Bad Mergentheim; Institut für Diabetesforschung  
16  
17 643 Münster GmbH Hohenzollernring 70 48145 Münster.  
18  
19 644 The study was initiated by a consortium of 19 statutory German health insurance funds represented by the AOK  
20  
21 645 federal association (AOK-Bundesverband – AOK-BV), the association of alternative health insurance funds  
22  
23 646 (Verband der Ersatzkrankenkassen – vdek) and the minors (Knappschaft). In order to guarantee outpatient care  
24  
25 647 for all study participants without any restrictions, the contracting health insurance companies provided integrated  
26  
27 648 care contracts for outpatient negative pressure wound therapy.  
28  
29 649 A project advisory board was implemented to coordinate all processes and project partners. The board comprised  
30  
31 650 two representatives each from the statutory health insurance funds, the management company and the sponsor as  
32  
33 651 well as one representative each from the participating medical device manufacturers (KCI and smith & nephew).  
34  
35 652 Representing the contracting authority (statutory German health insurance funds) Dr. Gerhard Schillinger (AOK-  
36  
37 653 BV) and Ute Leonhard (vdek) acted as contact persons for all aspects of the project.  
38  
39 654 The management company “Gesundheitsforen Leipzig” has been entirely responsible for the logistics of the  
40  
41 655 study. Central tasks of the management company included the recruitment of study sites and patients, the  
42  
43 656 development of the IT infrastructure including the documentation, communication and invoicing software as  
44  
45 657 well as the processing of all payments.  
46  
47 658 The manufacturers Kinetic Concepts Incorporated (KCI) (Acelity) and smith & nephew provided the NPWT  
48  
49 659 devices as well as support and training for the investigators and financed the study.  
50  
51 660 The Private University of Witten/Herdecke gGmbH acted as the Sponsor of the trial and the Institute for  
52  
53 661 Research in Operative Medicine with its former director Prof. E.A.M. Neugebauer, the current interim head Prof.  
54  
55 662 Rolf Lefering and the head of the division for clinical research Dörthe Seidel was responsible for the scientific  
56  
57 663 conception, the evaluation as well as the reporting and publication of the study. Prof. Dr. Rolf Lefering was  
58  
59 664 responsible for the statistical planning and analysis. PD Dr. Peter Krüger was responsible for the data  
60  
665 management of the study. Special thanks are going to Stefan Bauer, who supported the data management as well  
666 as the statistical analysis and reporting.

1  
2  
3  
4  
5  
6  
7  
8  
9  
10  
11  
12  
13  
14  
15  
16  
17  
18  
19  
20  
21  
22  
23  
24  
25  
26  
27  
28  
29  
30  
31  
32  
33  
34  
35  
36  
37  
38  
39  
40  
41  
42  
43  
44  
45  
46  
47  
48  
49  
50  
51  
52  
53  
54  
55  
56  
57  
58  
59  
60

667 We would like to thank Sophie Thorn, who checked the article as a native English speaker with regard to  
668 spelling and grammar.

For peer review only

1  
2  
3 669 **List of figures:**

4 670 Figure 1: Trial profile (CONSORT)

5  
6 671 Figure 2: Time until complete, sustained and verified wound closure in the ITT-population

7  
8 672 Figure 3: Time until complete, sustained and verified wound closure for the subgroup of big wounds

9  
10 673 Figure 4: Time until complete, sustained and verified wound closure for the subgroup of small wounds

11  
12 674 Figure 5: Time until complete, sustained and verified wound closure in the PP-population

13  
14 675  
15  
16  
17  
18  
19  
20  
21  
22  
23  
24  
25  
26  
27  
28  
29  
30  
31  
32  
33  
34  
35  
36  
37  
38  
39  
40  
41  
42  
43  
44  
45  
46  
47  
48  
49  
50  
51  
52  
53  
54  
55  
56  
57  
58  
59  
60

For peer review only



676 **Figures:**  
 677  
 678 Figure 1:

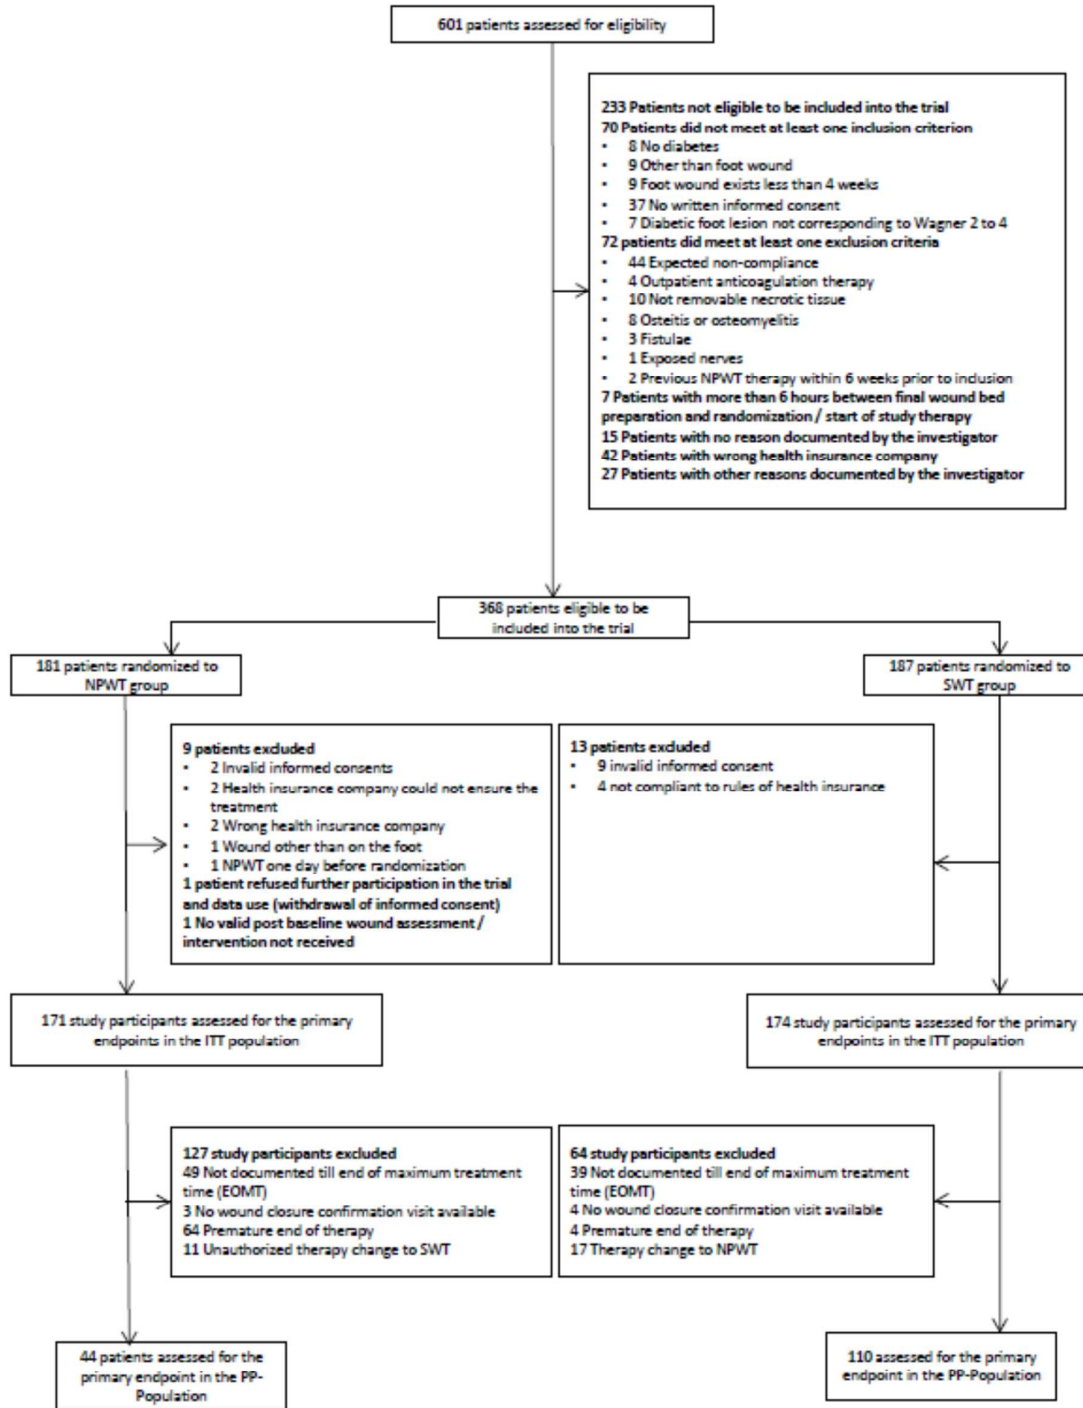

679

680 Figure 2:

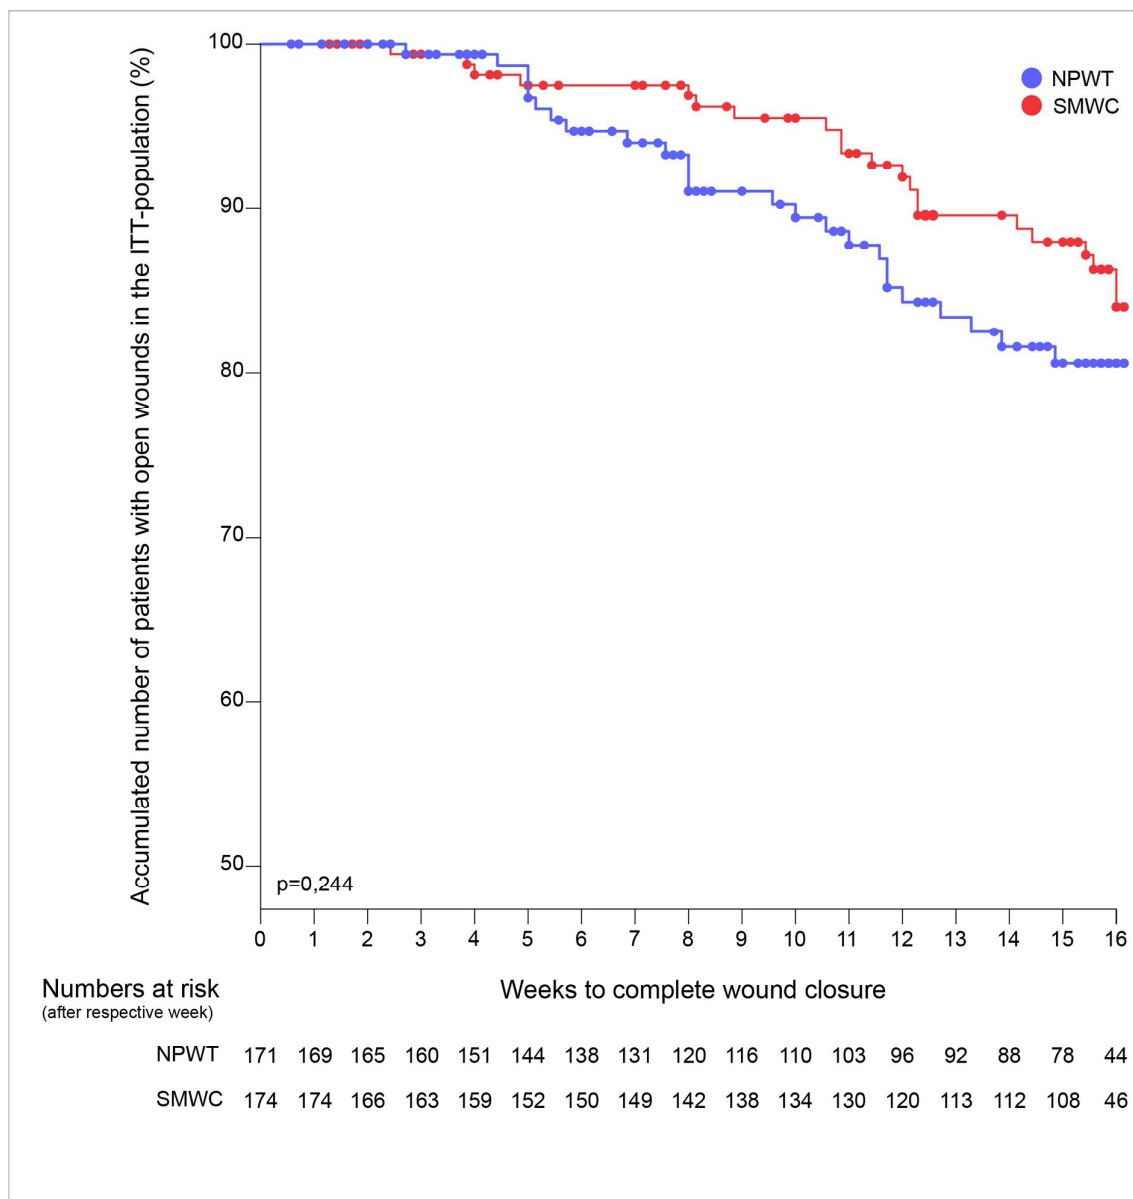

681

682

683 Figure 3:

684

1  
2  
3  
4  
5  
6  
7  
8  
9  
10  
11  
12  
13  
14  
15  
16  
17  
18  
19  
20  
21  
22  
23  
24  
25  
26  
27  
28  
29  
30  
31  
32  
33  
34  
35  
36  
37  
38  
39  
40  
41  
42  
43  
44  
45  
46  
47  
48  
49  
50  
51  
52  
53  
54  
55  
56  
57  
58  
59  
60

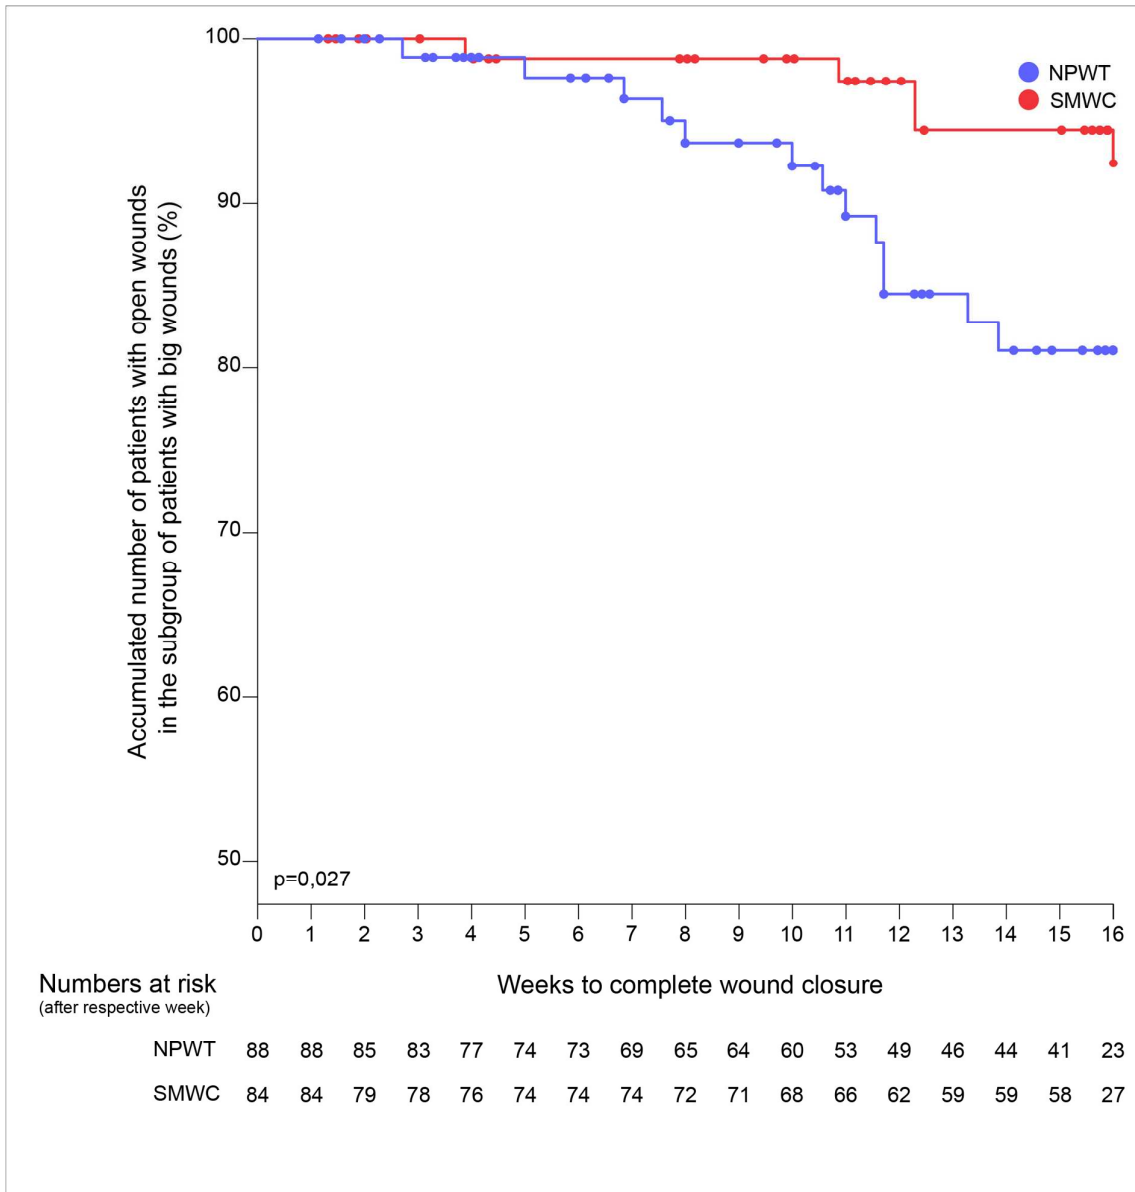

685

686

687 Figure 4:

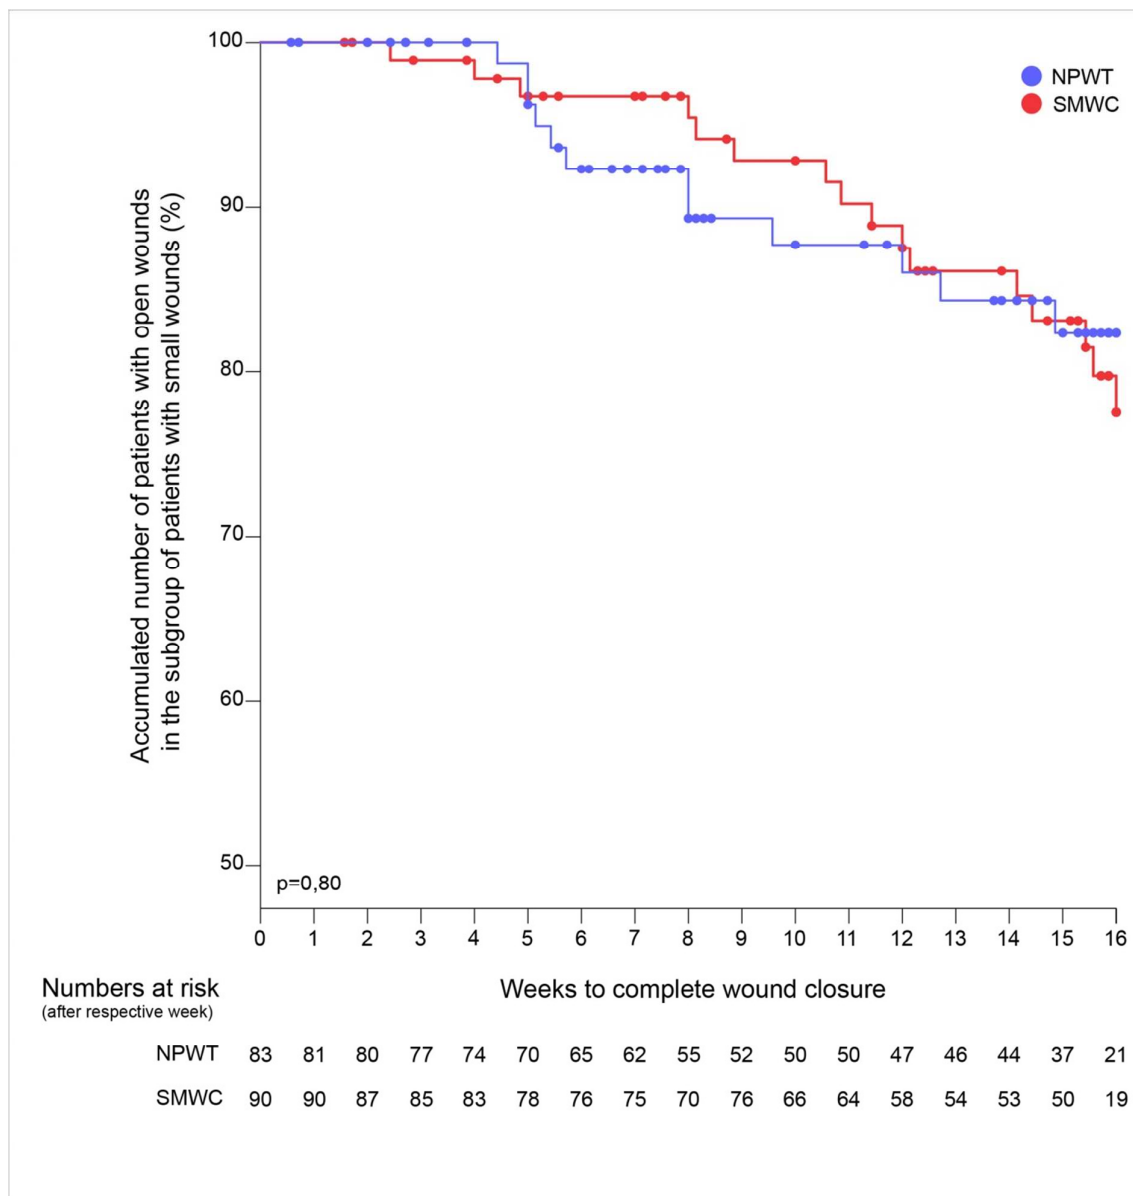

688

689

690 Figure5:

691

1  
2  
3  
4  
5  
6  
7  
8  
9  
10  
11  
12  
13  
14  
15  
16  
17  
18  
19  
20  
21  
22  
23  
24  
25  
26  
27  
28  
29  
30  
31  
32  
33  
34  
35  
36  
37  
38  
39  
40  
41  
42  
43  
44  
45  
46  
47  
48  
49  
50  
51  
52  
53  
54  
55  
56  
57  
58  
59  
60

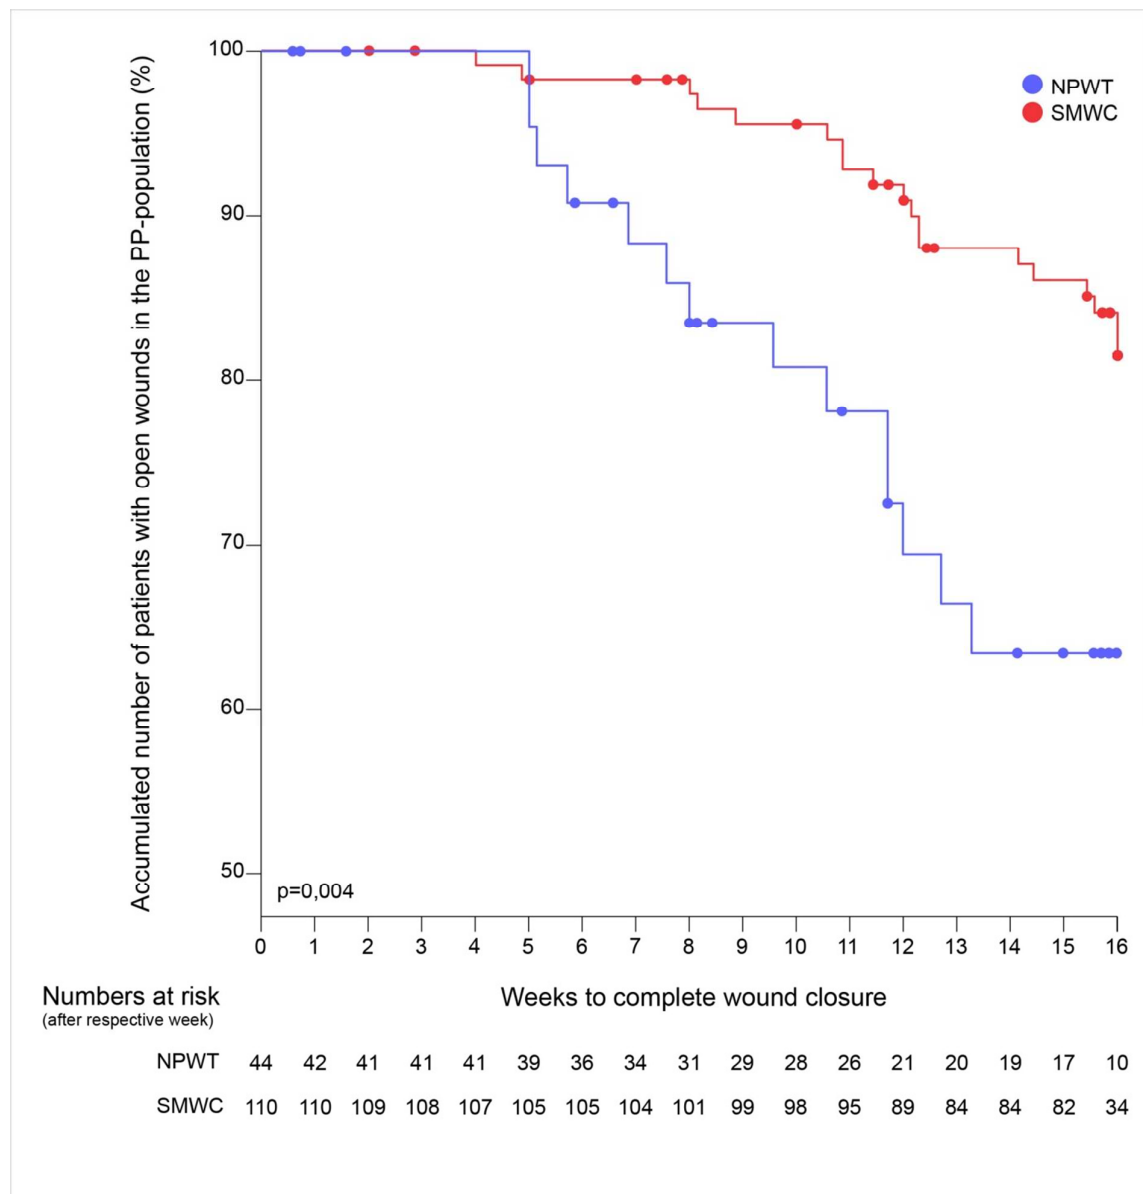

692

693 **References**

- 694 1. Graham, I.D., et al., *Prevalence of lower-limb ulceration: a systematic review of prevalence*  
695 *studies*. Adv Skin Wound Care, 2003. **16**(6): p. 305-16.
- 696 2. World Health Organization, *Global report on diabetes*. 2016, WHO:  
697 <http://www.who.int/diabetes/global-report/en/>.
- 698 3. International Diabetes Federation, *IDF Diabetes Atlas*. 2015, IDF: [www.diabetesatlas.org](http://www.diabetesatlas.org).
- 699 4. Yazdanpanah, L., M. Nasiri, and S. Adarvishi, *Literature review on the management of*  
700 *diabetic foot ulcer*. World J Diabetes, 2015. **6**(1): p. 37-53.
- 701 5. Leone, S., et al., [*Epidemiology of diabetic foot*]. Infez Med, 2012. **20 Suppl 1**: p. 8-13.
- 702 6. Vermeulen, H., et al., *Systematic review of dressings and topical agents for surgical wounds*  
703 *healing by secondary intention*. Br J Surg, 2005. **92**(6): p. 665-72.
- 704 7. Ruttermann, M., et al., *Local treatment of chronic wounds: in patients with peripheral*  
705 *vascular disease, chronic venous insufficiency, and diabetes*. Dtsch Arztebl Int, 2013. **110**(3):  
706 p. 25-31.
- 707 8. Wu, S.C., W. Marston, and D.G. Armstrong, *Wound care: the role of advanced wound-*  
708 *healing technologies*. J Am Podiatr Med Assoc, 2010. **100**(5): p. 385-94.
- 709 9. Fleischmann, W., et al., [*Vacuum sealing as treatment of soft tissue damage in open*  
710 *fractures*]. Unfallchirurg, 1993. **96**(9): p. 488-92.
- 711 10. Argenta, L.C. and M.J. Morykwas, *Vacuum-assisted closure: a new method for wound control*  
712 *and treatment: clinical experience*. Ann Plast Surg, 1997. **38**(6): p. 563-76; discussion 577.
- 713 11. Morykwas, M.J., et al., *Vacuum-assisted closure: a new method for wound control and*  
714 *treatment: animal studies and basic foundation*. Ann Plast Surg, 1997. **38**(6): p. 553-62.
- 715 12. Morykwas, M.J., et al., *Effects of varying levels of subatmospheric pressure on the rate of*  
716 *granulation tissue formation in experimental wounds in swine*. Ann Plast Surg, 2001. **47**(5): p.  
717 547-51.
- 718 13. German Federal Joint Committee. 2018 [cited 2018 August 18]; The Federal Joint  
719 Committee is a legal entity in public law. Authorised representative: Prof. Josef Hecken  
720 Competent supervisory authority: Federal Ministry of Health]. Available from:  
721 <http://www.english.g-ba.de/>.
- 722 14. Institute for Quality and Efficiency in Health Care (IQWiG). 2018 [cited 2018 August 16]; As  
723 an independent scientific institute, IQWiG examines the benefits and harms of medical  
724 interventions for patients. We provide information about the advantages and disadvantages of  
725 examination and treatment methods in the form of scientific reports and easily understandable  
726 health information.]. Available from: <https://www.iqwig.de/en/home.2724.html>.
- 727 15. IQWiG, *Vakuumversiegelungstherapie von Wunden. Abschlussbericht N04-03*. 2006, Institut  
728 für Qualität und Wirtschaftlichkeit im Gesundheitswesen (IQWiG): Cologne.
- 729 16. IQWiG, *Vakuumversiegelungstherapie von Wunden -Rapid Report- N06-02*. 2007, Institut für  
730 Qualität und Wirtschaftlichkeit im Gesundheitswesen (IQWiG): Cologne.
- 731 17. Gregor, S., et al., *Negative pressure wound therapy: a vacuum of evidence?* Arch Surg, 2008.  
732 **143**(2): p. 189-96.
- 733 18. Ubbink Dirk, T., et al. *Topical negative pressure for treating chronic wounds*. Cochrane  
734 Database of Systematic Reviews, 2008. DOI: 10.1002/14651858.CD001898.pub2.
- 735 19. Ubbink, D.T., et al., *A systematic review of topical negative pressure therapy for acute and*  
736 *chronic wounds*. Br J Surg, 2008. **95**(6): p. 685-92.
- 737 20. Peinemann, F. and S. Sauerland, *Negative-pressure wound therapy: systematic review of*  
738 *randomized controlled trials*. Dtsch Arztebl Int, 2011. **108**(22): p. 381-9.
- 739 21. Dumville, J.C., et al., *Negative pressure wound therapy for treating foot wounds in people*  
740 *with diabetes mellitus*. Cochrane Database Syst Rev, 2013(10): p. CD010318.
- 741 22. Rhee, S.M., et al., *Negative Pressure Wound Therapy Technologies for Chronic Wound Care*  
742 *in the Home Setting*. 2014, Johns Hopkins University Evidence-based Practice Center:  
743 Rockville (MD).
- 744 23. Canadian Agency for Drugs and Technologies in Health, *Negative Pressure Wound Therapy*  
745 *for Managing Diabetic Foot Ulcers: A Review of the Clinical Effectiveness, Cost-*  
746 *effectiveness, and Guidelines*. 2014: Ottawa (ON).

- 1  
2  
3 747 24. Liu, S., et al., *Evaluation of negative-pressure wound therapy for patients with diabetic foot*  
4 748 *ulcers: systematic review and meta-analysis*. Ther Clin Risk Manag, 2017. **13**: p. 533-544.  
5 749 25. Armstrong, D.G. and L.A. Lavery, *Negative pressure wound therapy after partial diabetic*  
6 750 *foot amputation: a multicentre, randomised controlled trial*. Lancet, 2005. **366**(9498): p.  
7 751 1704-10.  
8 752 26. Blume, P.A., et al., *Comparison of negative pressure wound therapy using vacuum-assisted*  
9 753 *closure with advanced moist wound therapy in the treatment of diabetic foot ulcers: a*  
10 754 *multicenter randomized controlled trial*. Diabetes Care, 2008. **31**(4): p. 631-6.  
11 755 27. IQWiG. *General Methods*. 2018; Available from: [https://www.iqwig.de/en/methods/methods-](https://www.iqwig.de/en/methods/methods-paper.3020.html)  
12 756 [paper.3020.html](https://www.iqwig.de/en/methods/methods-paper.3020.html).  
13 757 28. Seidel, D., et al., *Negative pressure wound therapy versus standard wound care in chronic*  
14 758 *diabetic foot wounds: study protocol for a randomized controlled trial*. Trials, 2014. **15**: p.  
15 759 334.  
16 760 29. Hardman, R.L., et al., *Overview of classification systems in peripheral artery disease*. Semin  
17 761 *Intervent Radiol*, 2014. **31**(4): p. 378-88.  
18 762 30. Bauer, H., et al. *Typ-2-Diabetes: Präventions- und Behandlungsstrategien für*  
19 763 *Fußkomplikationen*. Nationale Versorgungs Leitlinien, 2010.  
20 764 31. Dupont, W.D. and W.D. Plummer, Jr., *Power and sample size calculations. A review and*  
21 765 *computer program*. Control Clin Trials, 1990. **11**(2): p. 116-28.  
22 766 32. Rhee, S.M., et al., in *Negative Pressure Wound Therapy Technologies for Chronic Wound*  
23 767 *Care in the Home Setting*. 2014: Rockville (MD).  
24 768  
25  
26  
27  
28  
29  
30  
31  
32  
33  
34  
35  
36  
37  
38  
39  
40  
41  
42  
43  
44  
45  
46  
47  
48  
49  
50  
51  
52  
53  
54  
55  
56  
57  
58  
59  
60

## Supplementary Appendix

### Table of contents:

- List of investigators
- Supplementary discussion
- Supplementary tables

### List of investigators:

At least one patient was included in the following facilities:

|                                      |                                                                                                                   |
|--------------------------------------|-------------------------------------------------------------------------------------------------------------------|
| 1. PD Dr. med. Achim Neufang         | HSK - Dr. Horst Schmidt Kliniken GmbH<br>Klinik für Gefäßchirurgie<br>Ludwig-Erhard-Straße 100<br>65199 Wiesbaden |
| 2. Dr. med. Holger Lawall            | Asklepios Westklinikum Hamburg<br>Zentrum für Gefäßmedizin<br>Suurheid 20<br>22559 Hamburg                        |
| 3. Prof. Dr. med. Gernold<br>Wozniak | Knappschaftskrankenhaus Bottrop<br>Gefäßchirurgische Klinik<br>Osterfelderstraße 157<br>46242 Bottrop             |
| 4. Prof. Dr. med. Martin Storck      | Städtisches Klinikum Karlsruhe<br>Klinik für Gefäß- und Thoraxchirurgie<br>Moltkestraße 90<br>76133 Karlsruhe     |
| 5. Dr. med. Dirk Hochlenert          | Gemeinschaftspraxis Schlotmann-Hochlenert-Zavaleta-Haberstock<br>Merheimer Straße 217<br>50733 Köln               |
| 6. Dr. med. Gudrun Hetzel            | Klinikum Döbeln<br>Abt. für Gefäßchirurgie<br>Sörmitzer Straße 10<br>04720 Döbeln                                 |
| 7. Dr. med. Karsten Jungheim         | Klinikum Bielefeld Mitte<br>Klinik für Allgemeine Innere Medizin<br>Teutoburger Straße 50<br>33604 Bielefeld      |
| 8. Dr. med. Michael Petzold          | Klinikum Frankfurt/Oder<br>Klinik für Gefäßchirurgie<br>Müllroser Chaussee 7<br>15236 Frankfurt/Oder              |



|                                         |                                                                                                                                                                       |
|-----------------------------------------|-----------------------------------------------------------------------------------------------------------------------------------------------------------------------|
| 9. PD Dr. med. Matthias Weck            | Weißeritztal-Kliniken GmbH<br>Medizinische Klinik III<br>Bürgerstraße 7<br>1705 tal                                                                                   |
| 10. Dr. med. Alexandra Zidek            | Krankenhaus Porz am Rhein<br>Klinik für Gefäßchirurgie<br>Urbacher Weg 19<br>51149 Köln                                                                               |
| 11. Dr. med. Peter Mauckner             | St. Remigius Krankenhaus Opladen<br>Innere Medizin<br>An St. Remigius 26<br>51379 Leverkusen                                                                          |
| 12. Dr. med. Klemens M. Sondern         | Marien Hospital Dortmund-Hombruch<br>Klinik für Innere Medizin/Diabetologie<br>Gablonzstraße 9<br>44225 Dortmund                                                      |
| 13. Prof. Dr. med. Thomas Schmitz-Rixen | Universitätsklinikum Frankfurt<br>Zentrum für Chirurgie<br>Klinik für Gefäß- und Endovascularchirurgie<br>Theodor-Stern-Kai 7, Haus 23C/EG<br>60590 Frankfurt am Main |
| 14. Dr. med. Walter Wetzel-Roth         | Facharztpraxis für Chirurgie<br>Hindenburgstraße 1<br>86807 Buchloe                                                                                                   |
| 15. Dr. med. Matthias Hahn              | Helfenstein Klinik Geisslingen<br>Allgemein- und Viszeralchirurgie<br>Eybstraße 16<br>73312 Geislingen/Steige                                                         |
| 16. Dr. med. Karsten Glockemann         | Paracelsus-Klinik am Silbersee<br>Wundzentrum Hannover<br>Oertzeweg 24<br>30851 Langenhagen                                                                           |
| 17. PD Dr. med. Farzin Adili            | Klinikum Darmstadt<br>Chirurgische Klinik III<br>Grafenstraße 9<br>64283 Darmstadt                                                                                    |
| 18. Dr. med. Andreas Riemer             | Ortenau Klinikum Offenburg-Ebertplatz<br>Klinik für Allgemein-, Viszeral- und Gefäßchirurgie<br>Ebertplatz 12<br>77654 Offenburg                                      |

|                                             |                                                                                                                                                |
|---------------------------------------------|------------------------------------------------------------------------------------------------------------------------------------------------|
| 19. Dr. med. Thomas Krönert                 | Thüringen-Kliniken "Georgius Agricola" GmbH<br>Klinik für Gefäßchirurgie<br>Rainweg 68<br>7318 feld                                            |
| 20. Dr. med. Matthias Holfeld               | Klinikum Dorothea Christiane Erleben GmbH<br>Klinik für Allgemein-, Viszeral- und Gefäßchirurgie<br>Ditfurter Weg 24<br>6484 linburg           |
| 21. Prof. Dr. med. Jan Andre´ Schmidt-Lucke | Franziskus-Krankenhaus Berlin<br>Abt. für Innere Medizin<br>Budapester Straße 15-19<br>10787 Berlin                                            |
| 22. Dr. med. Wolf-Rüdiger Klare             | Hegau-Bodensee Klinikum Radolfzell (HBK)<br>Klinik für Innere Medizin<br>Hausherrenstraße 12<br>78315 Radolfzell                               |
| 23. Dr. med. Hansjörg Mühlen                | Diabetologische Schwerpunktpraxis Dr. med. Hansjörg Mühlen & Partner<br>Ruhrorter Straße 195<br>47119 Duisburg                                 |
| 24. Dr. med. Christian Reinhold             | Kliniken Maria Hilf Mönchengladbach<br>Klinik für Gefäßchirurgie und Angiologie<br>Sandradstraße 43<br>41061 Mönchengladbach                   |
| 25. Dr. med. Makarios Paschalidis           | Städtisches Klinikum München/Bogenhausen<br>Klinik für Endokrinologie, Diabetologie und Angiologie<br>Engschalkingerstraße 77<br>81925 München |
| 26. Gerhard Rothenaicher                    | Facharztpraxis für Chirurgie<br>Cosimastraße 2<br>81927 München                                                                                |
| 27. Dr. med. Elke Anne Klug                 | Bürgerhospital Frankfurt am Main<br>Interdisziplinäres Zentrum Diabetischer Fuß (DDG)<br>Nibelungenallee 37- 41<br>60318 Frankfurt am Main     |
| 28. Dr. med. Siamak Pourhassan              | Gemeinschaftspraxis für Chirurgie und Gefäßmedizin<br>Drs. Alter / Pourhassan / Heim<br>Klosterstraße 12<br>46145 Oberhausen                   |
| 29. Dr. med. Jan Theil                      | Evangelisches Krankenhaus Königin Elisabeth Herzberge gGmbH<br>Abt. für Kardiologie, Angiologie und Diabetologie                               |

|                                 |                                                                                                                                                                                     |
|---------------------------------|-------------------------------------------------------------------------------------------------------------------------------------------------------------------------------------|
|                                 | Herzbergstraße 79<br>10365 Berlin                                                                                                                                                   |
| 30. Dr. med. Martin Adolph      | Städtisches Klinikum Neunkirchen gGmbH<br>Abt. für Gefäßchirurgie & Phlebologie<br>Brunnenstraße 20<br>66538 Neunkirchen                                                            |
| 31. Dr. med. Frank von Feldmann | Westküstenklinikum Heide Klinik für Viszeral- und Gefäßchirurgie<br>Esmarchstraße 50<br>25746 Heide/Holstein                                                                        |
| 32. Dr. med. Gerald Engels      | Chir. Praxisgemeinschaft am Bayenthalgürtel<br>Praxis Dr. med. Gerald Engels<br>Bayenthalgürtel 45<br>50968 Köln                                                                    |
| 33. Dr. med. Joachim Oldenburg  | Malteser Krankenhaus – St. Franziskus-Hospital<br>Medizinische Klinik I<br>Abt. für Diabetologie<br>Waldstraße 17<br>24939 Flensburg                                                |
| 34. Dr. med. Philipp Knepp      | St. Marienkrankenhaus Siegen gGmbH<br>Klinik für Gastroenterologie<br>Kampenstraße 51<br>57072 Siegen                                                                               |
| 35. Dr. med. Steffen Hering     | Krankenhaus Bietigheim<br>Klinik für Innere Medizin, Kardiologie, Endokrinologie,<br>Diabetologie und Internistische Intensivmedizin<br>Riedstraße 12<br>74321 Bietigheim-Bissingen |
| 36. Dr. med. Harald Daum        | Asklepios Kliniken Harburg<br>Eißendorfer Pferdeweg 52<br>21075 Hamburg                                                                                                             |
| 37. Dr. med. Lutz Stemler       | Diabetologikum Ludwigshafen<br>Diabetes-Schwerpunktpraxis<br>Ludwigsplatz 9<br>67059 Ludwigshafen                                                                                   |
| 38. Dr. med. Thomas Müller      | Mariannen-Hospital Werl<br>Abt. für Chirurgie<br>Unnaer Straße 15<br>59457 Werl                                                                                                     |
| 39. Dr. med. Karl Zink          | Diabetes Klinik GmbH & Co KG<br>Theodor-Klotzbücher-Straße 12<br>97980 Bad Mergentheim                                                                                              |

|                           |                                                                                     |
|---------------------------|-------------------------------------------------------------------------------------|
| 40. Dr. med. Dirk Lammers | Institut für Diabetesforschung Münster GmbH<br>Hohenzollernring 70<br>48145 Münster |
|---------------------------|-------------------------------------------------------------------------------------|

### Supplementary Discussion

As direct blinding of patients and investigators was not possible due to the nature of the applied treatment methods, issues of blinding have been addressed using independent blinded outcome assessors and the W.H.A.T. for evaluating the wound photographs. For wound size and wound tissue the values documented by the investigators reflect the expected course much better than the W.H.A.T. results. During study planning the W.H.A.T. (<http://www.what-world.com/>) was the only available validated instrument that was able to measure both wound size and wound tissue composition (granulation, fibrin, and necrosis). For the wound surface area, the difference between the clinical measurements and the W.H.A.T. results may have been caused by the different evaluation methods. An elliptical wound surface area was calculated by the investigators using length and width, but most wounds are not elliptical. The independent blinded assessors marked the wound margin on the photograph and the W.H.A.T. calculates the wound surface area automatically afterwards, thus if the wound photo is of good quality the W.H.A.T. is more precise. In addition, the depth of the wound cannot be assessed using a wound photo, thus wound volume has only been evaluated using the clinical measurements provided by the investigators. The values for granulation tissue and fibrin differ significantly between the clinical estimations and the W.H.A.T. results. This may be caused by the quality of the wound photography, the reliability and precision of both the clinical investigator and the W.H.A.T. system and the wound itself. Wounds with invisible, deeper areas cannot be detected without manipulation. Both circumstances possibly affect the results.

### Supplementary tables

| Demographic and baseline parameters (PP-Population) | Total<br>N=154 (100%) | NPWT<br>N=44<br>(28·6%) | SMWC<br>N=110<br>(71·4%) |
|-----------------------------------------------------|-----------------------|-------------------------|--------------------------|
| Sex                                                 | N=154                 | N=44                    | N=110                    |
| Male                                                | 113 (73·4%)           | 29 (65·9%)              | 84 (76·4%)               |
| Female                                              | 41 (26·6%)            | 15 (34·1%)              | 26 (23·6%)               |
| Age in years                                        | N=154                 | N=44                    | N=110                    |
| Mean (SD)                                           | 67·4 (10·6)           | 66·5 (11·0)             | 67·8 (10·4)              |
| Height in cm                                        | N=153                 | N=43                    | N=110                    |
| Mean (SD)                                           | 173·8 (12·9)          | 173·5 (17·4)            | 174·0 (10·7)             |
| Weight in kg                                        | N=150                 | N=42                    | N=108                    |
| Mean (SD)                                           | 95·4 (23·3)           | 96·2 (21·6)             | 95·1 (24·0)              |
| Alcohol                                             | N=153                 | N=44                    | N=109                    |
| Occasionally                                        | 71 (46·4%)            | 22 (50·0%)              | 49 (45·0%)               |

|                                                                      |               |              |              |
|----------------------------------------------------------------------|---------------|--------------|--------------|
| Chronic                                                              | 3 (2·0%)      | 1 (2·3%)     | 2 (1·8%)     |
| No                                                                   | 79 (51·6%)    | 21 (47·7%)   | 58 (53·2%)   |
| Nicotine                                                             | N=154         | N=44         | N=110        |
| No                                                                   | 16 (10·4%)    | 2 (4·5%)     | 14 (12·7%)   |
| Yes                                                                  | 138 (89·6%)   | 42 (95·5%)   | 96 (87·3%)   |
| Number of years (Mean (SD))                                          | 37·0 (9·2)    | 42·0 (2·8)   | 36·3 (9·7)   |
| Packs / day (Mean)                                                   | 1·0           | 1·0          | 1·0          |
| Drugs                                                                | N=153         | N=44         | N=109        |
| Occasionally                                                         | 0 (0%)        | 0 (0%)       | 0 (0%)       |
| Chronic                                                              | 1 (0·7%)      | 0 (0%)       | 1 (0·9%)     |
| No                                                                   | 152 (99·3%)   | 44 (100%)    | 108 (99·1%)  |
| Requiring dialysis                                                   | N=154         | N=44         | N=110        |
| Yes                                                                  | 11 (7·1 %)    | 2 (4·5%)     | 9 (8·2%)     |
| No                                                                   | 143 (92·9%)   | 42 (95·5%)   | 101 (91·8%)  |
| Allergies                                                            | N=154         | N=44         | N=110        |
| Yes                                                                  | 16 (10·4%)    | 6 (13·6%)    | 10 (9·1%)    |
| No                                                                   | 138 (89·6%)   | 38 (86·4%)   | 100 (90·9%)  |
| Subjective assessment of nutritional condition                       | N=150         | N=43         | N=107        |
| Well-nourished                                                       | 147 (98·0%)   | 42 (97·7%)   | 105 (98·1%)  |
| Moderately malnourished or suspected malnutrition                    | 3 (2·0%)      | 1 (2·3%)     | 2 (1·9%)     |
| Malnourished                                                         | 0 (0%)        | 0 (0%)       | 0 (0%)       |
| Peripheral arterial occlusive disease (PAOD)                         | N=109 (70·8%) | N=29 (65·9%) | N=80 (72·7%) |
| without critical limb ischemia                                       | 103 (94·5%)   | 28 (96·6%)   | 75 (93·8%)   |
| with critical limb ischemia                                          | 6 (5·5%)      | 1 (3·4%)     | 5 (6·3%)     |
| Rutherford classification for chronic limb ischemia (Grade/Category) | N=109         | N=29         | N=80         |
| 0/0 Asymptomatic—no hemodynamically significant occlusive disease    | 13 (11·9%)    | 4 (13·8%)    | 9 (11·3%)    |
| I/1 Mild claudication                                                | 13 (11·9%)    | 2 (6·9%)     | 11 (13·8%)   |
| I/2 Moderate claudication                                            | 8 (7·3%)      | 0 (0·0%)     | 8 (10·0%)    |
| I/3 Severe claudication                                              | 4 (3·7%)      | 1 (3·4%)     | 3 (3·8%)     |
| II/4 Ischemic rest pain                                              | 1 (0·9%)      | 1 (3·4%)     | 0 (0%)       |
| III/5 Minor tissue loss—non healing ulcer, focal gangrene with       | 67 (61·5%)    | 21 (72·4%)   | 46 (57·5%)   |

|                                                                                                      |               |               |               |
|------------------------------------------------------------------------------------------------------|---------------|---------------|---------------|
| diffuse pedal ischemia                                                                               |               |               |               |
| III/6 Major tissue loss—extending above transmetatarsal level, functional foot no longer salvageable | 3 (2·8%)      | 0 (0·0%)      | 3 (3·8%)      |
| Revascularisation before study start                                                                 | N=9 (5·8%)    | N=1 (2·3%)    | N=8 (7·3%)    |
| Percutaneous transluminal angioplasty (PTA)                                                          | 5 (55·6%)     | 0 (0·0%)      | 5 (62·5%)     |
| PTA + Stent                                                                                          | 0 (0%)        | 0 (0%)        | 0 (0%)        |
| Veins-Bypass                                                                                         | 1 (11·1%)     | 1 (100·0%)    | 0 (11·1%)     |
| Polytetrafluoroethylene (PTFE) Bypass                                                                | 1 (11·1%)     | 0 (0%)        | 1 (12·5%)     |
| Thromboendarterectomy and patch plastic                                                              | 2 (22·2%)     | 0 (0%)        | 2 (25·0%)     |
| Revascularization with influence on the wound                                                        | 9 of 9 (100%) | 1 of 1 (100%) | 0 of 8 (100%) |
| Sufficient revascularization result                                                                  | 9 of 9 (100%) | 1 of 1 (100%) | 8 of 8 (100%) |
| Insufficient revascularization result                                                                | 0 of 9 (0%)   | 0 of 1 (0%)   | 0 of 8 (0%)   |
| Revascularization result not assessable                                                              | 0 of 9 (0%)   | 0 of 1 (0%)   | 0 of 8 (0%)   |

Table S1: Patient demographics and baseline characteristics of the Per-Protocol (PP) population. Data are N (%) and Mean (SD). “N=” is stating the number of patients with actual available information. Findings, diagnoses and procedures documented by the investigators are presented.

| Observation time point | Wound surface NPWT                                         |                               | Wound surface SMWC                                         |                               |
|------------------------|------------------------------------------------------------|-------------------------------|------------------------------------------------------------|-------------------------------|
|                        | Calculated from width and length (according to eCRF entry) | Results of the photo analysis | Calculated from width and length (according to eCRF entry) | Results of the photo analysis |
| Randomization          | 1060 (1536)                                                | 687 (879)                     | 1141 (3247)                                                | 664 (1050)                    |
|                        | 550 (1236)                                                 | 321 (760)                     | 471 (1007)                                                 | 316 (658)                     |
|                        | N=171 (2)                                                  | N=118 (10)                    | N=174 (0)                                                  | N=129 (13)                    |
| Week 1                 | 847 (1489)                                                 | 643 (820)                     | 1085 (3234)                                                | 713 (1065)                    |
|                        | 397 (801)                                                  | 329 (750)                     | 395 (867)                                                  | 307 (749)                     |
|                        | N=171 (15)                                                 | N=118 (32)                    | N=174 (25)                                                 | N=129 (36)                    |
| Week 3                 | 810 (1472)                                                 | 590 (742)                     | 1025 (3242)                                                | 701 (1212)                    |
|                        | 314 (860)                                                  | 273 (633)                     | 390 (913)                                                  | 266 (768)                     |
|                        | N=171 (24)                                                 | N=118 (28)                    | N=174 (22)                                                 | N=129 (35)                    |
| Week 5                 | 717 (1379)                                                 | 607 (828)                     | 759 (1466)                                                 | 610 (1119)                    |
|                        | 275 (769)                                                  | 231 (843)                     | 267 (824)                                                  | 219 (635)                     |
|                        | N=171 (37)                                                 | N=118 (42)                    | N=174 (41)                                                 | N=129 (38)                    |
| Week 8                 | 636 (1322)                                                 | 495 (770)                     | 674 (1410)                                                 | 501 (937)                     |
|                        | 220 (712)                                                  | 182 (561)                     | 186 (783)                                                  | 165 (481)                     |

|         |                                       |                                      |                                       |                                       |
|---------|---------------------------------------|--------------------------------------|---------------------------------------|---------------------------------------|
|         | N=171 (52)                            | N=118 (48)                           | N=174 (42)                            | N=129 (42)                            |
| Week 12 | 549 (858)<br>165 (964)<br>N=171 (110) | 457 (742)<br>134 (494)<br>N=118 (88) | 570 (940)<br>169 (632)<br>N=174 (124) | 493 (950)<br>133 (498)<br>N=129 (104) |
| Week 16 | 440 (810)<br>79 (471)<br>N=171 (80)   | 334 (649)<br>114 (363)<br>N=118 (66) | 493 (1095)<br>69 (415)<br>N=174 (63)  | 351 (750)<br>77 (320)<br>N=129 (56)   |

Table S2: Change of wound surface area in the course of the study treatment time of maximum 16 weeks in the ITT-population. Change of wound surface area in the course of the study treatment time of maximum 16 weeks separately shown for the calculated data from width and length as documented in the eCRF and for the data derived from the photo analysis. An elliptical wound surface area has been calculated from the documented width and length (eCRF) [ $(\pi / 4) \times \text{length} \times \text{width} = \text{area}$ ]. Data show mean (SD) and median (IQR) as well the number (N) of values analyzed for the ITT population (number (N) of values substituted by the last observation carried forward (LOCF) method).

| Observation time point | Wound volume NPWT (mm <sup>3</sup> )       | Wound volume SMWC (mm <sup>3</sup> )        |
|------------------------|--------------------------------------------|---------------------------------------------|
| Randomization          | 22498 (58930)<br>4710 (15048)<br>N=171 (2) | 21740 (74181)<br>4759 (12888)<br>N=174 (0)  |
| Week 1                 | 13203 (28709)<br>2487 (6908)<br>N=171 (15) | 19979 (73143)<br>3533 (11407)<br>N=174 (26) |
| Week 3                 | 10708 (28521)<br>1884 (6857)<br>N=171 (24) | 16217 (67494)<br>2293 (8831)<br>N=174 (23)  |
| Week 5                 | 7700 (19719)<br>1166 (5338)<br>N=171 (37)  | 11286 (32566)<br>1365 (7539)<br>N=174 (42)  |
| Week 8                 | 5592 (11535)<br>785 (4604)<br>N=171 (78)   | 8772 (27674)<br>812 (5258)<br>N=174 (67)    |
| Week 12                | 5333 (12422)<br>565 (3913)<br>N=171 (119)  | 6639 (16454)<br>625 (4083)<br>N=174 (133)   |
| Week 16                | 3880 (10534)<br>141 (1890)<br>N=171 (83)   | 5465 (14874)<br>200 (1587)<br>N=174 (64)    |

1  
2  
3 Table S3: Change of wound volume in the course of the study treatment time of maximum 16 weeks in the ITT-population.  
4 Change of wound volume (length x width x depth) in the course of the study treatment time of maximum 16 weeks calculated  
5 from width, length and depth as documented in the eCRF. Data show mean (SD) and median (IQR) as well the number (N) of  
6 values analyzed for the ITT population (number (N) of values substituted by the last observation carried forward (LOCF)  
7 method).  
8  
9  
10  
11  
12  
13  
14  
15  
16  
17  
18  
19  
20  
21  
22  
23  
24  
25  
26  
27  
28  
29  
30  
31  
32  
33  
34  
35  
36  
37  
38  
39  
40  
41  
42  
43  
44  
45  
46  
47  
48  
49  
50  
51  
52  
53  
54  
55  
56  
57  
58  
59  
60

For peer review only



| Observation time point | NPWT Granulation |          | NPWT Fibrin |          | NPWT Necrosis |          | SMWC Granulation |           | SMWC Fibrin |          | SMWC Necrosis |          |
|------------------------|------------------|----------|-------------|----------|---------------|----------|------------------|-----------|-------------|----------|---------------|----------|
|                        | eCRF             | W.H.A.T. | eCRF        | W.H.A.T. | eCRF          | W.H.A.T. | eCRF             | W.H.A.T.  | eCRF        | W.H.A.T. | eCRF          | W.H.A.T. |
| Rando                  | 34 (36)          | 22 (25)  | 21 (28)     | 71 (27)  | 3 (10)        | 7 (15)   | 34 (37)          | 24 (26)   | 22 (29)     | 69 (28)  | 2 (9)         | 7 (14)   |
|                        | 20 (70)          | 12 (37)  | 10 (30)     | 79 (46)  | 0 (0)         | 0 (5)    | 20 (71)          | 14 (39)   | 10 (40)     | 79 (44)  | 0 (0)         | 0 (8)    |
|                        | 171 (2)          | 118 (8)  | 170 (4)     | 118 (8)  | 169 (5)       | 118 (8)  | 174 (3)          | 129 (12)  | 174 (1)     | 129 (12) | 172 (2)       | 129 (12) |
| Week 1                 | 58 (35)          | 21 (25)  | 19 (22)     | 73 (27)  | 5 (13)        | 6 (12)   | 49 (35)          | 21 (25)   | 24 (27)     | 74 (26)  | 6 (15)        | 5 (9)    |
|                        | 70 (70)          | 10 (36)  | 10 (30)     | 81 (47)  | 0 (2)         | 0 (5)    | 50 (70)          | 10 (36)   | 15 (31)     | 85 (40)  | 0 (5)         | 0 (5)    |
|                        | 171 (16)         | 118 (32) | 71 (19)     | 118 (32) | 169 (23)      | 118 (32) | 174 (28)         | 129 (36)  | 174 (27)    | 129 (36) | 172 (30)      | 129 (36) |
| Week 3                 | 67 (31)          | 16 (23)  | 18 (22)     | 80 (25)  | 5 (13)        | 4 (11)   | 57 (32)          | 21 (25)   | 25 (26)     | 77 (25)  | 5 (13)        | 3 (7)    |
|                        | 80 (55)          | 5 (25)   | 10 (30)     | 91 (30)  | 0 (0)         | 0 (1)    | 60 (60)          | 10 (36)   | 20 (35)     | 85 (36)  | 0 (3)         | 0 (1)    |
|                        | 171 (26)         | 118 (27) | 171 (30)    | 118 (27) | 169 (28)      | 118 (27) | 174 (24)         | 129 (35)  | 174 (25)    | 129 (35) | 172 (30)      | 129 (35) |
| Week 5                 | 70 (30)          | 15 (22)  | 18 (24)     | 83 (22)  | 4 (13)        | 2 (8)    | 62 (31)          | 18 (26)   | 23 (25)     | 80 (26)  | 4 (12)        | 3 (10)   |
|                        | 80 (45)          | 6 (21)   | 10 (25)     | 91 (26)  | 0 (0)         | 0 (1)    | 63 (50)          | 4 (32)    | 10 (39)     | 93 834   | 0 (0)         | 0 (0)    |
|                        | 171 (36)         | 118 (43) | 171 (38)    | 118 (43) | 169 (42)      | 118 (43) | 174 (44)         | 129 (36)  | 174 (47)    | 129 (36) | 172 (46)      | 129 (36) |
| Week 8                 | 74 (30)          | 16 (23)  | 17 (24)     | 82 (24)  | 4 (13)        | 2 (6)    | 70 (29)          | 17 (24)   | 17 (21)     | 80 (25)  | 5 (13)        | 3 (11)   |
|                        | 90 (40)          | 4 (27)   | 10 (20)     | 93 (33)  | 0 (0)         | 0 (0)    | 80 (40)          | 3 (33)    | 10 (20)     | 92 (36)  | 0 (0)         | 0 (0)    |
|                        | 171 (53)         | 118 (48) | 171 (56)    | 118 (48) | 171 (59)      | 118 (48) | 174 (44)         | 129 (43)  | 174 (49)    | 129 (43) | 174 (52)      | 129 (43) |
| Week 12                | 75 (30)          | 15 (23)  | 17 (25)     | 83 (24)  | 4 (13)        | 1 (5)    | 73 (29)          | 16 (23)   | 16 (20)     | 82 (23)  | 5 (13)        | 2 (6)    |
|                        | 90 (40)          | 4 (22)   | 5 (20)      | 96 (23)  | 0 (0)         | 0 (0)    | 80 (38)          | 3 (29)    | 10 (20)     | 93 (32)  | 0 (0)         | 0 (0)    |
|                        | 171(115)         | 118 (89) | 171(118)    | 118 (89) | 171(119)      | 118 (89) | 174(124)         | 129(102)  | 174(125)    | 129(102) | 172(126)      | 129(102) |
| Week 16                | 77 (30)          | 13 (22)  | 14 (22)     | 86 (24)  | 3 (10)        | 1 (6)    | 76 (30)          | 17 (24)   | 15 (24)     | 81 (24)  | 3 (13)        | 2 (6)    |
|                        | 90 (40)          | 1 (17)   | 2 (20)      | 98 (19)  | 0 (0)         | 0 (0)    | 90 (40)          | 4 (31)    | 5 (20)      | 93 (35)  | 0 (0)         | 0 (0)    |
|                        | 171 (78)         | 118 (66) | 171 (79)    | 118 (66) | 171 (82)      | 118 (66) | 174 (62)         | 129 (576) | 174 (65)    | 129 (56) | 174 (66)      | 129 (56) |

1  
2  
3  
4 Table S1: Change of wound tissue composition in the course of the study treatment time of maximum 16 week in the ITT-population. Change of wound tissue (granulation, fibrin, and necrosis) in  
5 the course of the study treatment time of maximum 16 weeks separately shown for the data documented in the eCRF and for the data derived from the photo analysis using the Wound Healing  
6 Analyzing Tool (W.H.A.T.). Data show mean (SD) and median (IQR) as well the number (N) of values analyzed for the ITT population (number (N) of values substituted by the last observation  
7 carried forward (LOCF) method).  
8  
9  
10  
11  
12  
13  
14  
15  
16  
17  
18  
19  
20  
21  
22  
23  
24  
25  
26  
27  
28  
29  
30  
31  
32  
33  
34  
35  
36  
37  
38  
39  
40  
41  
42  
43  
44  
45  
46  
47

For peer review only

| Observation time point | Pain Total<br>N=344               | Pain NPWT<br>N=171               | Pain SMWC<br>N=173               |
|------------------------|-----------------------------------|----------------------------------|----------------------------------|
| Screening              | 2.1 (2.4)<br>1 (4)<br>N=344 (0)   | 2.1 (2.3)<br>1 (4)<br>N=171 (0)  | 2.1 (2.4)<br>1 (4)<br>N=173 (0)  |
| Week 1                 | 1.7 (2.2)<br>1 (3)<br>N=344 (6)   | 1.6 (2.2)<br>0 (2)<br>N=171 (1)  | 1.8 (2.2)<br>1 (3)<br>N=173 (5)  |
| Week 3                 | 1.5 (2.0)<br>1 (2)<br>N=344 (27)  | 1.3 (1.9)<br>0 (2)<br>N=171 (11) | 1.7 (2.1)<br>1 (3)<br>N=173 (16) |
| Week 5                 | 1.3 (1.9)<br>0 (2)<br>N=344 (45)  | 1.2 (1.9)<br>0 (2)<br>N=171 (21) | 1.4 (2.0)<br>0 (2)<br>N=173 (24) |
| Week 8                 | 1.3 (1.9)<br>0 (2)<br>N=344 (70)  | 1.2 (1.9)<br>0 (2)<br>N=171 (38) | 1.3 (1.9)<br>0 (2)<br>N=173 (32) |
| Week 12                | 1.1 (1.8)<br>0 (2)<br>N=344 (115) | 1.2 (1.9)<br>0 (2)<br>N=171 (64) | 1.1 (1.8)<br>0 (2)<br>N=173 (51) |
| Week 16                | 1.0 (1.7)<br>0 (1)<br>N=344 (129) | 1.0 (1.7)<br>0 (2)<br>N=171 (76) | 0.9 (1.7)<br>0 (1)<br>N=173 (53) |

Table S2: Pain in the course of the study treatment time of maximum 16 weeks in the ITT-population. Pain evaluation at the pre-defined observation time points during the active study treatment time of 16 weeks in the ITT population. Data show mean (SD) and median (IQR) as well the number (N) of values analyzed for the ITT population (number (N) of values substituted by the last observation carried forward (LOCF) method).

| Observation time point | EQ5D NPWT                              | EQ5D SMWC                               |
|------------------------|----------------------------------------|-----------------------------------------|
| Screening              | 0,53 (0,27)<br>0,53 (0,2)<br>N=156 (2) | 0,53 (0,24)<br>0,53 (0,18)<br>N=159 (3) |
| End of therapy         | 0,67 (0,24)<br>0,77 (0,29)<br>N=62 (2) | 0,72 (0,17)<br>0,66 (0,35)<br>N=13 (0)  |

|                                     |             |             |
|-------------------------------------|-------------|-------------|
| End of maximum study treatment time | 0,66 (0,22) | 0,61 (0,25) |
|                                     | 0,66 (0,28) | 0,63 (0,24) |
|                                     | N=63 (2)    | N=95 (2)    |
| Follow up after 6 months            | 0,69 (0,26) | 0,67 (0,23) |
|                                     | 0,77 (0,35) | 0,63 (0,39) |
|                                     | N=93 (3)    | N=97 (2)    |

Table S3: Quality of life (EQ5D) in the course of the study treatment time of 16 week in the ITT-population. Quality of life evaluated with the EQ5D instrument at the pre-defined observation time points during the active study treatment time of 16 weeks in the ITT-population. Data show mean (SD) and median (IQR) as well the number (N) of values analyzed for the ITT population (number (N) of values substituted by the last observation carried forward (LOCF) method).

| Wound surface area<br>mm <sup>2</sup> | Small wounds   |              |              |       | Big wounds     |              |              |       |
|---------------------------------------|----------------|--------------|--------------|-------|----------------|--------------|--------------|-------|
|                                       | Total<br>N=173 | NPWT<br>N=83 | SMWC<br>N=90 | p     | Total<br>N=172 | NPWT<br>N=88 | SMWC<br>N=84 | p     |
| N (LOCF)                              | 2              | 2            | 0            | 0.232 | 0              | 0            | 0            | 0.193 |
| Mean (SD)                             | 213 (136)      | 212 (138)    | 213 (135)    |       | 1995 (3377)    | 1860 (1805)  | 2135 (4474)  |       |
| Median (IQR)                          | 188 (220)      | 176 (220)    | 196 (222)    |       | 1276 (1482)    | 1364 (1242)  | 1242 (1708)  |       |
| Min - Max                             | 12-484         | 20-484       | 12-471       |       | 491-40773      | 520-13188    | 491-40773    |       |

Table S4: Wound surface area for small and big wounds. Data show the number (N) of participants available for the analysis in total and for both treatment arms, the number (N) of values substituted by the last observation carried forward (LOCF) method; mean (SD), median (IQR); and minimum (min) and maximum (max).

| Wound closure rate                           | NPWT (N=171) | SMWC (N=174) | p    |
|----------------------------------------------|--------------|--------------|------|
| <b>Small wounds</b>                          | <b>N=83</b>  | <b>N=90</b>  |      |
| Within 16 weeks maximum study treatment time | 12 (14.5 %)  | 16 (17.8 %)  | 0.6  |
| At follow up after 6 months                  | 13 (15.7 %)  | 24 (26.7 %)  | 0.10 |

Table S5: Wound closure rates within the maximum study treatment time of 16 weeks and within the study observation time of 6 months for small wounds. Data show the number (N) of participants available for the analysis in total and for both treatment arms and the number of patients with wound closure (N) within 16 weeks and after 6 months as well the percentage (%) of patients achieving the endpoints within both treatment arms.

| Wound closure rate                           | NPWT (N=171) | SMWC (N=174) | P    |
|----------------------------------------------|--------------|--------------|------|
| <b>Big wounds</b>                            | <b>N=88</b>  | <b>N=84</b>  |      |
| Within 16 weeks maximum study treatment time | 13 (14.8 %)  | 5 (6.0 %)    | 0.08 |
| At follow up after 6 months                  | 11 (12.5 %)  | 12 (14.3 %)  | 0.82 |

Table S6: Wound closure rates within the maximum study treatment time of 16 weeks and within the study observation time of 6 months for big wounds. Data show the number (N) of participants available for the analysis in total and for both

treatment arms and the number of patients with wound closure (N) within 16 weeks and after 6 months as well the percentage (%) of patients achieving the endpoints within both treatment arms.

| <b>Time until min. 95 % granulation tissue for small wounds</b> | <b>Total (N=100)</b> | <b>NPWT (N=52)</b> | <b>SMWC (N=48)</b> | <b>p</b> |
|-----------------------------------------------------------------|----------------------|--------------------|--------------------|----------|
| Mean (SD)                                                       | 38·6 (37·4)          | 28·5 (30·0)        | 49·5 (41·6)        | 0·005    |
| Median (IQR)                                                    | 26·5 (50·0)          | 20·0 (28·0)        | 48·0 (79·0)        |          |
| Min-Max                                                         | 0-114                | 0-113              | 0-114              |          |

Table S7: Time until optimal preparation of the wound bed (min. 95 % granulation tissue) for the subgroup of small wounds. Data show the number (N) of participants available for the analysis in total and for both treatment arms; mean (SD); median (IQR); and minimum (min) and maximum (max).

| <b>Time until min 95 % granulation tissue for big wounds</b> | <b>Total (N=80)</b> | <b>NPWT (N=47)</b> | <b>SMWC (N=33)</b> | <b>p</b> |
|--------------------------------------------------------------|---------------------|--------------------|--------------------|----------|
| Mean (SD)                                                    | 47·8 (40·8)         | 43·4 (37·9)        | 54·0 (44·6)        | 0·27     |
| Median (IQR)                                                 | 36·5 (70·0)         | 35·0 (61·0)        | 56·0 (105·0)       |          |
| Min-Max                                                      | 0-127               | 0-127              | 0-115              |          |

Table S 8: Time until optimal preparation of the wound bed (min 95 % granulation tissue) for the subgroup of big wounds. Data show the number (N) of participants available for the analysis in total and for both treatment arms; mean (SD); median (IQR); and minimum (min) and maximum (max).

| <b>Amputations &amp; Resections</b>                    | <b>Total</b> | <b>NPWT</b> | <b>SMWC</b> | <b>p</b> |
|--------------------------------------------------------|--------------|-------------|-------------|----------|
| <b>Small wounds</b>                                    | <b>N=173</b> | <b>N=83</b> | <b>N=90</b> |          |
| No. of patients with amputations or resections [N (%)] | 35 (20·2%)   | 19 (22·9%)  | 16 (17·8%)  | 0·45 (F) |
| No. of performed amputations and resections [N]        | 50           | 22          | 28          | 0·51 (U) |
| No. of patients with minor amputations [N (%)]         | 35 (20·2%)   | 19 (22·9%)  | 16 (17·8%)  | 0·45 (F) |
| No. of patients with major amputations [N (%)]         | 0 (0%)       | 0 (0%)      | 0 (0%)      | -        |

Table S9: Amputations and resections in the subgroup of small wounds. Data show the number (N) of participants available for the analysis in total and for both treatment arms and the number (N) and the percentage (%) of patients with amputations or resections and minor and major amputations.

| <b>Amputations &amp; Resections</b> | <b>Total</b> | <b>NPWT</b> | <b>SMWC</b> | <b>p</b> |
|-------------------------------------|--------------|-------------|-------------|----------|
| <b>Big wounds</b>                   | <b>N=172</b> | <b>N=88</b> | <b>N=84</b> |          |

|                                                        |            |            |            |          |
|--------------------------------------------------------|------------|------------|------------|----------|
| No. of patients with amputations or resections [N (%)] | 36 (20.9%) | 16 (18.2%) | 20 (23.8%) | 0.45 (F) |
| No. of performed amputations and resections [N]        | 52         | 45         | 57         | 0.41 (U) |
| No. of patients with minor amputations [N (%)]         | 34 (19.8%) | 14 (15.9%) | 20 (23.8%) | 0.25 (F) |
| No. of patients with major amputations [N (%)]         | 2 (1.2%)   | 2 (2.3%)   | 0 (0%)     | 0.50 (F) |

Table S10: Amputations and resections in the subgroup of big wounds. Data show the number (N) of participants available for the analysis in total and for both treatment arms and the number (N) and the percentage (%) of patients with amputations or resections and minor and major amputations.

| Wound closure rate                     | Total<br>N=154 | NPWT<br>N=44 | SMWC<br>N=110 | p     |
|----------------------------------------|----------------|--------------|---------------|-------|
| Wound closures [N (%)] within 16 weeks | 33 (21.4 %)    | 14 (31.8%)   | 19 (17.3%)    | 0.053 |
| Wound closures [N (%)] after 6 months  | 41 (26.6 %)    | 11 (25.0%)   | 30 (27.3%)    | 0.84  |

Table S11: Wound closure rate after 6 months and in the PP-population. Data show the number (N) of participants available for the analysis in total and for both treatment arms and the number (N) and the percentage (%) of patients with wound closures within 16 weeks and after 6 months.

| Time until min. 95 % granulation tissue | Total (N=100) | NPWT (N=38) | SMWC (N=62) | p      |
|-----------------------------------------|---------------|-------------|-------------|--------|
| Mean (SD)                               | 43.8 (42.3)   | 23.8 (31.7) | 56.0 (43.5) | <0.001 |
| Median (IQR)                            | 30.0 (76)     | 8.5 (28.0)  | 56.0 (96.0) |        |
| Min - Max                               | 0 - 127       | 0 - 127     | 0 - 115     |        |

Table S12: Time until optimal preparation of the wound for further treatment (min 95 % granulation tissue) in the PP-population. Data show the number (N) of participants available for the analysis in total and for both treatment arms; mean (SD); median (IQR); and minimum (min) and maximum (max).

| Recurrences                              | Total (N=154) | NPWT (N=44) | SMWC (N=110) | p    |
|------------------------------------------|---------------|-------------|--------------|------|
| No. of patients with recurrences [N (%)] | 8 (5.2 %)     | 3 (8.1 %)   | 5 (5.3%)     | 0.69 |
| No. of recurrences [N]                   | 9             | 4           | 5            | 0.38 |

Table S13: Recurrences in the PP-population. Data show the number (N) of participants available for the analysis in total and for both treatment arms and the number (N) and the percentage (%) of patients with recurrences.

| Amputations & Resections                             | Total (N=154) | NPWT<br>(N=44) | SMWC<br>(N=110) | p    |
|------------------------------------------------------|---------------|----------------|-----------------|------|
| No. of patients with amputation or resection [N (%)] | 30 (19.5%)    | 9 (20.5%)      | 21 (21.4%)      | 0.83 |

|                                                |            |           |            |      |
|------------------------------------------------|------------|-----------|------------|------|
| No. of amputations or resections [N]           | 39         | 11        | 28         | 0·86 |
| No. of patients with Minor-Amputations [N (%)] | 30 (18·9%) | 9 (12·8%) | 21 (21·4%) | 0·83 |
| No. of patients with Major-Amputations [N (%)] | 0 (0%)     | 0 (0%)    | 0 (0%)     | -    |

Table S14: Amputations and resections in the PP-population. Data show the number (N) of participants available for the analysis in total and for both treatment arms and the number (N) and the percentage (%) of patients with amputations or resections and minor and major amputations.

| Observation time point | Wound surface NPWT                                         |                                     | Wound surface SMWC                     |                                                            |
|------------------------|------------------------------------------------------------|-------------------------------------|----------------------------------------|------------------------------------------------------------|
|                        | Calculated from width and length (according to eCRF entry) | Results of the photo analysis       | Observation time point                 | Calculated from width and length (according to eCRF entry) |
| Randomization          | 964 (1392)<br>345 (1426)<br>N= 44 (1)                      | 633 (795)<br>299 (705)<br>N=41 (3)  | 878 (1266)<br>373 (889)<br>N= 110 (0)  | 669 (1143)<br>294 (692)<br>N=102 (9)                       |
| Week 1                 | 525 (696)<br>224 (408)<br>N= 44 (5)                        | 524 (614)<br>318 (561)<br>N=41 (8)  | 827 (1238)<br>306 (863)<br>N= 110 (16) | 706 (1138)<br>289 (775)<br>N=102 (27)                      |
| Week 3                 | 428 (635)<br>176 (378)<br>N= 44 (6)                        | 477 (737)<br>165 (424)<br>N=41 (9)  | 803 (1306)<br>238 (867)<br>N= 110 (7)  | 714 (1316)<br>259 (656)<br>N=102 (26)                      |
| Week 5                 | 355 (590)<br>100 (291)<br>N= 44 (8)                        | 418 (602)<br>165 (435)<br>N=41 (15) | 650 (1157)<br>161 (670)<br>N= 110 (18) | 607 (1212)<br>167 (545)<br>N=102 (29)                      |
| Week 8                 | 284 (528)<br>53 (217)<br>N= 44 (8)                         | 320 (530)<br>83 (264)<br>N=41 (16)  | 569 (1072)<br>106 (443)<br>N= 110 (17) | 479 (990)<br>123 (397)<br>N=102 (29)                       |
| Week 12                | 283 (580)<br>14 (130)<br>N= 44 (24)                        | 289 (537)<br>62 (175)<br>N=41 (32)  | 528 (1024)<br>79 (419)<br>N= 110 (71)  | 474 (1006)<br>111 (407)<br>N=102 (80)                      |
| Week 16                | 190 (416)<br>0 (95)<br>N= 44 (14)                          | 179 (333)<br>30 (204)<br>N=41 (25)  | 386 (1124)<br>31 (159)<br>N= 110 (19)  | 319 (724)<br>65 (256)<br>N=102 (42)                        |

Table S18: Change of wound surface area during the study treatment time of maximum 16 weeks separately shown for the calculated data from width and length as documented in the eCRF and for the data derived from the photo analysis. Data show mean (SD) and median (IQR) as well the number (N) of values analyzed for the PP population (number (N) of values substituted by the last observation carried forward (LOCF) method).

| Observation time point | Wound volume NPWT (mm <sup>3</sup> )      | Wound volume SMWC (mm <sup>3</sup> )       |
|------------------------|-------------------------------------------|--------------------------------------------|
| Randomization          | 33359 (95749)<br>5746 (17330)<br>N=44 (1) | 14742 (36523)<br>3905 (11189)<br>N=110 (0) |
| Week 1                 | 11606 (26991)<br>1824 (6113)<br>N=44 (5)  | 13525 (34844)<br>2470 (9479)<br>N=110 (16) |
| Week 3                 | 8636 (24698)<br>777 (3199)<br>N=44 (6)    | 11907 (32047)<br>1864 (8039)<br>N=110 (7)  |
| Week 5                 | 5480 (13967)<br>271 (1790)<br>N=44 (7)    | 8981 (25570)<br>1027 (4745)<br>N=110 (18)  |
| Week 8                 | 3955 (9056)<br>192 (809)<br>N=44 (16)     | 6899 (18607)<br>506 (3915)<br>N=110 (29)   |
| Week 12                | 6052 (16114)<br>71 (681)<br>N=44 (25)     | 5964 (15930)<br>361 (1890)<br>N=110 (77)   |
| Week 16                | 3246 (11245)<br>0 (319)<br>N=44 (15)      | 3396 (10783)<br>57 (609)<br>N=110 (19)     |

Table S15: Change of wound volume (length x width x depth) in the course of the study treatment time of maximum 16 weeks calculated from width· length and depth as documented in the eCRF. Data show mean (SD) and median (IQR) as well the number (N) of values analyzed for the PP population (number (N) of values substituted by the last observation carried forward (LOCF) method).



| Observation<br>time point | NPWT Granulation |          | NPWT Fibrin |          | NPWT Necrosis |          | SMWC Granulation |          | SMWC Fibrin |          | SMWC Necrosis |          |
|---------------------------|------------------|----------|-------------|----------|---------------|----------|------------------|----------|-------------|----------|---------------|----------|
|                           | eCRF             | W.H.A.T. | eCRF        | W.H.A.T. | eCRF          | W.H.A.T. |                  | eCRF     | W.H.A.T.    | eCRF     | W.H.A.T.      | eCRF     |
| Rando                     | 32 (37)          | 23 (26)  | 18 (27)     | 68 (27)  | 2 (7)         | 9 (15)   | 38 (38)          | 26 (27)  | 21 (29)     | 67 (29)  | 1 (7)         | 7 (15)   |
|                           | 10 (68)          | 13 (37)  | 3 (28)      | 69 (45)  | 0 (0)         | 0 (15)   | 25 (80)          | 16 (42)  | 10 (33)     | 77 (56)  | 0 (0)         | 0 (8)    |
|                           | 44 (1)           | 41 (2)   | 44 (1)      | 41 (2)   | 44 (1)        | 41 (2)   | 110 (0)          | 102 (9)  | 110 (0)     | 102 (9)  | 108 (2)       | 102 (9)  |
| Week 1                    | 72 (37)          | 22 (26)  | 7 (13)      | 70 (28)  | 2 (7)         | 9 (15)   | 54 (35)          | 24 (27)  | 22 (24)     | 72 (27)  | 5 (14)        | 5 (9)    |
|                           | 90 (50)          | 9 (41)   | 0 (10)      | 75 (50)  | 0 (0)         | 0 (11)   | 63 (70)          | 13 (42)  | 13 (28)     | 78 (42)  | 0 (1)         | 0 (6)    |
|                           | 44 (5)           | 41 (8)   | 44 (6)      | 41 (8)   | 44 (7)        | 41 (8)   | 110 (16)         | 102 (27) | 110 (16)    | 102 (27) | 108 (19)      | 102 (27) |
| Week 3                    | 77 (32)          | 16 (24)  | 11 (19)     | 79 (26)  | 1 (4)         | 6 (14)   | 61 (31)          | 24 (27)  | 25 (25)     | 75 (26)  | 4 (11)        | 3 (7)    |
|                           | 93 (34)          | 2 (29)   | 0 (20)      | 91 (37)  | 0 (0)         | 0 (1)    | 70 (50)          | 15 (42)  | 20 (35)     | 83 (41)  | 0 (0)         | 0 (1)    |
|                           | 44 (6)           | 41 (9)   | 44 (7)      | 41 (9)   | 44 (7)        | 41 (9)   | 110 (9)          | 102 (26) | 110 (10)    | 102 (26) | 108 (13)      | 102 (26) |
| Week 5                    | 82 (29)          | 10 (16)  | 9 (19)      | 87 (17)  | 1 (4)         | 3 (9)    | 65 (29)          | 19 (27)  | 24 (24)     | 78 (27)  | 3 (9)         | 3 (11)   |
|                           | 95 (20)          | 4 (11)   | 2 (10)      | 93 (21)  | 0 (0)         | 0 (1)    | 73 (46)          | 4 (34)   | 13 (37)     | 93 (35)  | 0 (0)         | 0 (0)    |
|                           | 44 (7)           | 41 (16)  | 44 (8)      | 41 (16)  | 44 (9)        | 41 (16)  | 110 (19)         | 102 (27) | 110 (22)    | 102 (27) | 108 (22)      | 102 (27) |
| Week 8                    | 85 (27)          | 15 (25)  | 6 (13)      | 82 (26)  | 2 (6)         | 3 (8)    | 74 (27)          | 20 (26)  | 18(21)      | 77 (27)  | 3 (10)        | 3 (12)   |
|                           | 100 (20)         | 1 (16)   | 0 (5)       | 96 (35)  | 0 (0)         | 0 (0)    | 80 (31)          | 3 (38)   | 10 (18)     | 91 (43)  | 0 (0)         | 0 (0)    |
|                           | 44 (9)           | 41 (16)  | 44 (10)     | 41 (16)  | 44 (9)        | 41 (16)  | 110 (18)         | 102 (30) | 110 (21)    | 102 (30) | 108 (25)      | 102 (30) |
| Week 12                   | 86 (26)          | 13 (24)  | 6 (14)      | 85 (26)  | 2 (9)         | 2 (6)    | 77 (27)          | 18 (25)  | 16 (20)     | 80 (25)  | 3 (11)        | 2 (6)    |
|                           | 100 (18)         | 1 (13)   | 0 (4)       | 99 (20)  | 0 (0)         | 0 (0)    | 85 (29)          | 3 (36)   | 10 (20)     | 92 (36)  | 0 (0)         | 0 (0)    |
|                           | 44 (26)          | 41 (34)  | 44 (26)     | 41 (32)  | 44 (28)       | 41 (32)  | 110 (72)         | 101 (78) | 110 (73)    | 102 (79) | 108 (73)      | 102 (80) |
| Week 16                   | 87 (25)          | 12 (22)  | 6 (14)      | 86 (24)  | 0-1 (1)       | 1 (6)    | 80 (30)          | 19 (25)  | 14 (24)     | 80 (26)  | 2 (11)        | 1 (5)    |
|                           | 100 (15)         | 0 (14)   | 0 (1)       | 100 (20) | 0 (0)         | 0 (0)    | 95 (20)          | 5 (36)   | 0 (20)      | 92 (36)  | 0 (0)         | 0 (0)    |
|                           | 44 (14)          | 41 (25)  | 44 (16)     | 41 (25)  | 44 (15)       | 41 (25)  | 110 (18)         | 102 (42) | 110 (21)    | 102 (42) | 108 (24)      | 102 (42) |

1  
2  
3  
4 Table S20: Change of tissue (granulation, fibrin, necrosis) during the study treatment time of maximum 16 weeks separately shown for the data documented in the eCRF and for the data derived  
5 from the photo analysis using the wound healing analyzing too (W.H.A.T.). Data show mean (SD) and median (IQR) as well the number (N) of values analyzed for the PP population (number (N) of  
6 values substituted by the last observation carried forward (LOCF) method).  
7  
8  
9  
10  
11  
12  
13  
14  
15  
16  
17  
18  
19  
20  
21  
22  
23  
24  
25  
26  
27  
28  
29  
30  
31  
32  
33  
34  
35  
36  
37  
38  
39  
40  
41  
42  
43  
44  
45  
46  
47

For peer review only

| <b>Observation time point</b> | <b>Pain Total<br/>N=344</b>     | <b>Pain NPWT<br/>N=171</b>       |
|-------------------------------|---------------------------------|----------------------------------|
| Screening                     | 1.3 (2.1)<br>0 (2)<br>N=44 (0)  | 1.8 (2.3)<br>1 (3)<br>N=110 (0)  |
| Week 1                        | 0.7 (1.5)<br>0 (1)<br>N=44 (0)  | 1.4 (2.1)<br>0 (3)<br>N=110 (5)  |
| Week 3                        | 0.4 (0.7)<br>0 (1)<br>N=44 (4)  | 1.3 (1.8)<br>0 (2)<br>N=110 (3)  |
| Week 5                        | 0.3 (0.8)<br>0 (0)<br>N=44 (2)  | 1.0 (1.6)<br>0 (2)<br>N=110 (5)  |
| Week 8                        | 0.4 (1.1)<br>0 (0)<br>N=44 (4)  | 0.9 (1.5)<br>0 (2)<br>N=110 (9)  |
| Week 12                       | 0.3 (1.0)<br>0 (0)<br>N=44 (11) | 0.7 (1.3)<br>0 (1)<br>N=110 (18) |
| Week 16                       | 0.2 (0.7)<br>0 (0)<br>N=44 (14) | 0.5 (1.2)<br>0 (0)<br>N=110 (13) |

Table S16: Pain evaluation at the pre-defined observation time points during the active study treatment time of 16 weeks in the PP population. Data show mean (SD) and median (IQR) as well the number (N) of values analyzed for the PP population (number (N) of values substituted by the last observation carried forward (LOCF) method).

| <b>Observation time point</b>       | <b>EQ5D NPWT</b>                       | <b>EQ5D SMWC</b>                        |
|-------------------------------------|----------------------------------------|-----------------------------------------|
| Screening                           | 0.61 (0.23)<br>0.63 (0.24)<br>N=42 (1) | 0.60 (0.20)<br>0.59 (0.25)<br>N=100 (3) |
| End of therapy                      | 0.65 (0.20)<br>0.78 (0.20)<br>N=26 (2) | 0.81 (0.14)<br>0.87 (0.26)<br>N=8 (0)   |
| End of maximum study treatment time | 0.65 (0.25)                            | 0.66 (0.21)                             |

|                          |                                        |                                        |
|--------------------------|----------------------------------------|----------------------------------------|
|                          | 0·66 (0·43)<br>N=19 (0)                | 0·63 (0·28)<br>N=73 (2)                |
| Follow up after 6 months | 0·75 (0·22)<br>0·78 (0·30)<br>N=26 (0) | 0·70 (0·23)<br>0·77 (0·34)<br>N=73 (2) |

Table S17: Quality of life evaluated with the EQ5D instrument at the pre-defined observation time points during the active study treatment time of 16 weeks in the PP population. Data show mean (SD) and median (IQR) as well the number (N) of values analyzed for the PP population (number (N) of values substituted by the last observation carried forward (LOCF) method).

For peer review only

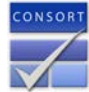

## CONSORT 2010 checklist of information to include when reporting a randomised trial\*

| Section/Topic                    | Item No | Checklist item                                                                                                                                                                              | Reported on page No |
|----------------------------------|---------|---------------------------------------------------------------------------------------------------------------------------------------------------------------------------------------------|---------------------|
| <b>Title and abstract</b>        |         |                                                                                                                                                                                             |                     |
|                                  | 1a      | Identification as a randomised trial in the title                                                                                                                                           | 1                   |
|                                  | 1b      | Structured summary of trial design, methods, results, and conclusions (for specific guidance see CONSORT for abstracts)                                                                     | 2                   |
| <b>Introduction</b>              |         |                                                                                                                                                                                             |                     |
| Background and objectives        | 2a      | Scientific background and explanation of rationale                                                                                                                                          | 3-5                 |
|                                  | 2b      | Specific objectives or hypotheses                                                                                                                                                           | 6                   |
| <b>Methods</b>                   |         |                                                                                                                                                                                             |                     |
| Trial design                     | 3a      | Description of trial design (such as parallel, factorial) including allocation ratio                                                                                                        | 6                   |
|                                  | 3b      | Important changes to methods after trial commencement (such as eligibility criteria), with reasons                                                                                          | 6,8,9               |
| Participants                     | 4a      | Eligibility criteria for participants                                                                                                                                                       | 6,7                 |
|                                  | 4b      | Settings and locations where the data were collected                                                                                                                                        | 6                   |
| Interventions                    | 5       | The interventions for each group with sufficient details to allow replication, including how and when they were actually administered                                                       | 7,8                 |
| Outcomes                         | 6a      | Completely defined pre-specified primary and secondary outcome measures, including how and when they were assessed                                                                          | 8,9                 |
|                                  | 6b      | Any changes to trial outcomes after the trial commenced, with reasons                                                                                                                       | n.a.                |
| Sample size                      | 7a      | How sample size was determined                                                                                                                                                              | 9,10                |
|                                  | 7b      | When applicable, explanation of any interim analyses and stopping guidelines                                                                                                                | n.a.                |
| <b>Randomisation:</b>            |         |                                                                                                                                                                                             |                     |
| Sequence generation              | 8a      | Method used to generate the random allocation sequence                                                                                                                                      | 7                   |
|                                  | 8b      | Type of randomisation; details of any restriction (such as blocking and block size)                                                                                                         | 7                   |
| Allocation concealment mechanism | 9       | Mechanism used to implement the random allocation sequence (such as sequentially numbered containers), describing any steps taken to conceal the sequence until interventions were assigned | 7                   |
| Implementation                   | 10      | Who generated the random allocation sequence, who enrolled participants, and who assigned participants to interventions                                                                     | 7                   |
| Blinding                         | 11a     | If done, who was blinded after assignment to interventions (for example, participants, care providers, those                                                                                | 7                   |

|                                                      |     |                                                                                                                                                   |                |
|------------------------------------------------------|-----|---------------------------------------------------------------------------------------------------------------------------------------------------|----------------|
|                                                      |     | assessing outcomes) and how                                                                                                                       |                |
|                                                      | 11b | If relevant, description of the similarity of interventions                                                                                       | n.a.           |
| Statistical methods                                  | 12a | Statistical methods used to compare groups for primary and secondary outcomes                                                                     | 10             |
|                                                      | 12b | Methods for additional analyses, such as subgroup analyses and adjusted analyses                                                                  | 10             |
| <b>Results</b>                                       |     |                                                                                                                                                   |                |
| Participant flow (a diagram is strongly recommended) | 13a | For each group, the numbers of participants who were randomly assigned, received intended treatment, and were analysed for the primary outcome    | 12 Fig. 1      |
|                                                      | 13b | For each group, losses and exclusions after randomisation, together with reasons                                                                  | Fig. 1         |
| Recruitment                                          | 14a | Dates defining the periods of recruitment and follow-up                                                                                           | 12             |
|                                                      | 14b | Why the trial ended or was stopped                                                                                                                | n.a.           |
| Baseline data                                        | 15  | A table showing baseline demographic and clinical characteristics for each group                                                                  | 12,13,14Tab. 1 |
| Numbers analysed                                     | 16  | For each group, number of participants (denominator) included in each analysis and whether the analysis was by original assigned groups           | Fig. 1         |
| Outcomes and estimation                              | 17a | For each primary and secondary outcome, results for each group, and the estimated effect size and its precision (such as 95% confidence interval) | 14-20          |
|                                                      | 17b | For binary outcomes, presentation of both absolute and relative effect sizes is recommended                                                       | 14-20          |
| Ancillary analyses                                   | 18  | Results of any other analyses performed, including subgroup analyses and adjusted analyses, distinguishing pre-specified from exploratory         | 18-19          |
| Harms                                                | 19  | All important harms or unintended effects in each group (for specific guidance see CONSORT for harms)                                             | 19-20          |
| <b>Discussion</b>                                    |     |                                                                                                                                                   |                |
| Limitations                                          | 20  | Trial limitations, addressing sources of potential bias, imprecision, and, if relevant, multiplicity of analyses                                  | 3,21-22        |
| Generalisability                                     | 21  | Generalisability (external validity, applicability) of the trial findings                                                                         | 22             |
| Interpretation                                       | 22  | Interpretation consistent with results, balancing benefits and harms, and considering other relevant evidence                                     | 21             |
| <b>Other information</b>                             |     |                                                                                                                                                   |                |
| Registration                                         | 23  | Registration number and name of trial registry                                                                                                    | 2              |
| Protocol                                             | 24  | Where the full trial protocol can be accessed, if available                                                                                       | 6              |
| Funding                                              | 25  | Sources of funding and other support (such as supply of drugs), role of funders                                                                   | 10-11          |

\*We strongly recommend reading this statement in conjunction with the CONSORT 2010 Explanation and Elaboration for important clarifications on all the items. If relevant, we also recommend reading CONSORT extensions for cluster randomised trials, non-inferiority and equivalence trials, non-pharmacological treatments, herbal interventions, and pragmatic trials. Additional extensions are forthcoming: for those and for up to date references relevant to this checklist, see [www.consort-statement.org](http://www.consort-statement.org).

# BMJ Open

## Negative Pressure Wound Therapy compared with standard moist wound care on diabetic foot ulcers in real-life clinical practice – Results of the German DiaFu-RCT

|                                 |                                                                                                                                                                                                                                                                                                                                                                                                                                                                                                                                                                                                                                                                                                                                                                                                                                                                                                                                                                                                                                                                                      |
|---------------------------------|--------------------------------------------------------------------------------------------------------------------------------------------------------------------------------------------------------------------------------------------------------------------------------------------------------------------------------------------------------------------------------------------------------------------------------------------------------------------------------------------------------------------------------------------------------------------------------------------------------------------------------------------------------------------------------------------------------------------------------------------------------------------------------------------------------------------------------------------------------------------------------------------------------------------------------------------------------------------------------------------------------------------------------------------------------------------------------------|
| Journal:                        | <i>BMJ Open</i>                                                                                                                                                                                                                                                                                                                                                                                                                                                                                                                                                                                                                                                                                                                                                                                                                                                                                                                                                                                                                                                                      |
| Manuscript ID                   | bmjopen-2018-026345.R1                                                                                                                                                                                                                                                                                                                                                                                                                                                                                                                                                                                                                                                                                                                                                                                                                                                                                                                                                                                                                                                               |
| Article Type:                   | Original research                                                                                                                                                                                                                                                                                                                                                                                                                                                                                                                                                                                                                                                                                                                                                                                                                                                                                                                                                                                                                                                                    |
| Date Submitted by the Author:   | 14-Jun-2019                                                                                                                                                                                                                                                                                                                                                                                                                                                                                                                                                                                                                                                                                                                                                                                                                                                                                                                                                                                                                                                                          |
| Complete List of Authors:       | Seidel, Dörthe; Universität Witten/Herdecke, Institut für Forschung in der Operativen Medizin (IFOM)<br>Storck, Martin; Städtisches Klinikum Karlsruhe gGmbH, Klinik für Gefäß- und Thoraxchirurgie<br>Lawall, Holger; Praxis für Herz-Kreislaufkrankungen; Max-Grundig Klinik<br>Wozniak, Gernold; Knappschafts-Krankenhaus Bottrop GmbH, Gefäßchirurgische Klinik<br>Mauckner, Peter; St. Remigius Krankenhaus Opladen, Innere Medizin<br>Hochlenert, Dirk; Gemeinschaftspraxis Schlotmann-Hochlenert-Zavaleta-Haberstock<br>Wetzel-Roth, Walter; Chirurgische Praxis Wetzel-Roth<br>Sondern, Klemens; Marien Hospital Dortmund-Hombruch, Klinik für Innere Medizin/Diabetologie<br>Hahn, Matthias; Helfenstein Klinik, Allgemein- und Viszeralchirurgie<br>Rothenaicher, Gerhard; Chirurgische Praxis Rothenaicher<br>Krönert, Thomas; Thüringen-Kliniken "Georgius Agricola" GmbH, Klinik für Gefäßchirurgie<br>Zink, Karl; Diabetes Klinik<br>Neugebauer, Edmund; Universität Witten/Herdecke Department für Humanmedizin; Medizinische Hochschule Brandenburg -Theodor Fontane |
| <b>Primary Subject Heading</b>: | Diabetes and endocrinology                                                                                                                                                                                                                                                                                                                                                                                                                                                                                                                                                                                                                                                                                                                                                                                                                                                                                                                                                                                                                                                           |
| Secondary Subject Heading:      | Surgery, Evidence based practice, Dermatology                                                                                                                                                                                                                                                                                                                                                                                                                                                                                                                                                                                                                                                                                                                                                                                                                                                                                                                                                                                                                                        |
| Keywords:                       | negative pressure wound therapy, wound healing, benefit assessment, wound treatment, Diabetic foot < DIABETES & ENDOCRINOLOGY, wound care                                                                                                                                                                                                                                                                                                                                                                                                                                                                                                                                                                                                                                                                                                                                                                                                                                                                                                                                            |
|                                 |                                                                                                                                                                                                                                                                                                                                                                                                                                                                                                                                                                                                                                                                                                                                                                                                                                                                                                                                                                                                                                                                                      |

SCHOLARONE™  
Manuscripts



I, the Submitting Author has the right to grant and does grant on behalf of all authors of the Work (as defined in the below author licence), an exclusive licence and/or a non-exclusive licence for contributions from authors who are: i) UK Crown employees; ii) where BMJ has agreed a CC-BY licence shall apply, and/or iii) in accordance with the terms applicable for US Federal Government officers or employees acting as part of their official duties; on a worldwide, perpetual, irrevocable, royalty-free basis to BMJ Publishing Group Ltd ("BMJ") its licensees and where the relevant Journal is co-owned by BMJ to the co-owners of the Journal, to publish the Work in this journal and any other BMJ products and to exploit all rights, as set out in our [licence](#).

The Submitting Author accepts and understands that any supply made under these terms is made by BMJ to the Submitting Author unless you are acting as an employee on behalf of your employer or a postgraduate student of an affiliated institution which is paying any applicable article publishing charge ("APC") for Open Access articles. Where the Submitting Author wishes to make the Work available on an Open Access basis (and intends to pay the relevant APC), the terms of reuse of such Open Access shall be governed by a Creative Commons licence – details of these licences and which [Creative Commons](#) licence will apply to this Work are set out in our licence referred to above.

Other than as permitted in any relevant BMJ Author's Self Archiving Policies, I confirm this Work has not been accepted for publication elsewhere, is not being considered for publication elsewhere and does not duplicate material already published. I confirm all authors consent to publication of this Work and authorise the granting of this licence.



1  
2  
3 1 **Negative Pressure Wound Therapy compared with standard moist wound care on**  
4 **diabetic foot ulcers in real-life clinical practice – Results of the German DiaFu-RCT**

5 2  
6 3  
7  
8 4 Dörthe Seidel, Martin Storck, Holger Lawall, Gernold Wozniak, Peter Mauckner, Dirk Hochlenert, Walter Wetzel-Roth,  
9 5 Klemens Sondern, Matthias Hahn, Gerhard Rothenaicher, Thomas Krönert, Karl Zink, Edmund Neugebauer

10 6  
11 7 Institut für Forschung in der Operativen Medizin (IFOM), University of Witten/Herdecke, Köln, Germany (D Seidel MD),  
12 8 Doerthe.Seidel@uni-wh.de

13 9 Klinik für Gefäß- und Thoraxchirurgie, Städtisches Klinikum Karlsruhe, Karlsruhe, Germany (Prof M Storck MD),  
14 10 Martin.Storck@klinikum-karlsruhe.de

15 11 Praxis für Herz-Kreislaufkrankungen, Ettlingen und Max-Grundig Klinik Bühlerhöhe, Germany (Dr med H Lawall MD),  
16 12 holger.lawall@gmail.com

17 13 Gefäßchirurgische Klinik, Knappschaftskrankenhaus, Bottrop, Germany (Prof G Wozniak MD), gernold.wozniak@kk-  
18 14 bottrop.de

19 15 Innere Medizin, St. Remigius Krankenhaus Opladen, Leverkusen, Germany (Dr med P Mauckner MD), peter-  
20 16 mauckner@live.de

21 17 Gemeinschaftspraxis Schlotmann-Hochlenert-Zavaleta-Haberstock, Köln, Germany (Dr med D Hochlenert MD),  
22 18 dirk.hochlenert@web.de

23 19 Chirurgische Praxis Wetzel-Roth, Buchloe, Germany (Dr med W Wetzel-Roth MD), info@wetzels-oth.de

24 20 Klinik für Innere Medizin/Diabetologie, Marien Hospital Dortmund-Hombruch, Dortmund, Germany (Dr med Sondern MD),  
25 21 klemens.sondern@marien-hospital-dortmund.de

26 22 Allgemein- und Viszeralchirurgie, Helfenstein Klinik, Geisslingen, Germany (Dr med M Hahn, MD), matthias.hahn@af-k.de

27 23 Chirurgische Praxis Rothenaicher, München, Germany (G Rothenaicher MD), rothenaicher@arcor.de

28 24 Klinik für Gefäßchirurgie, Thüringen-Kliniken "Georgius Agricola" GmbH, Saalfeld, Germany (Dr med T Krönert MD),  
29 25 tkroenert@thueringen-kliniken.de

30 26 Diabetes Klinik, Bad Mergentheim, Germany (Dr med K Zink MD), zink@diabetes-zentrum.de

31 27 University of Witten/Herdecke, Köln, Germany (Prof E Neugebauer), Edmund.Neugebauer@uni-wh.de

32 28

33 29 **Correspondence to:**

34 30 Dörthe Seidel\*

35 31 Institut für Forschung in der Operativen Medizin (IFOM)

36 32 University of Witten/Herdecke

37 33 Ostmerheimerstraße 200 Haus 38

38 34 Köln (Cologne)

39 35 51109 Germany

40 36 [Doerthe.Seidel@uni-wh.de](mailto:Doerthe.Seidel@uni-wh.de)

1  
2  
3 **37 Abstract**

4  
5 **38 Objectives**

6  
7 39 The aim of the DiaFu-study was to evaluate effectiveness and safety of negative pressure wound therapy  
8 40 (NPWT) in patients with diabetic foot wounds in clinical practice.

9  
10 **41 Design**

11  
12 42 In this controlled clinical superiority trial with blinded outcome assessment patients were randomized in a 1:1  
13 43 ratio stratified by study site and ulcer severity grade using a web-based-tool.

14  
15 **44 Setting**

16  
17 45 This German-national study was conducted in 40 surgical and internal medicine in- and outpatient facilities  
18 46 specialized in diabetes foot care.

19  
20 **47 Participants**

21  
22 48 368 patients were randomized and 345 participants were included in the modified ITT-population. Consentable,  
23 49 compliant adult patients suffering from a diabetic foot ulcer at least for 4 weeks and without contraindication for  
24 50 NPWT were allowed to be included.

25  
26 **51 Interventions**

27  
28 52 NPWT was compared with SMWC according to local standards and guidelines.

29  
30 **53 Primary and secondary outcome measures**

31  
32 54 Primary endpoints were wound closure rate and time to closure within 16 weeks. Secondary endpoints were  
33 55 wound and treatment related adverse events, amputations, time until optimal wound bed preparation, wound size  
34 56 and wound tissue composition, pain, and quality of life within 16 weeks, and recurrences and wound closure rate  
35 57 within 6 months.

36  
37 **58 Results**

38  
39 59 In the ITT-population 25 patients in the NPWT-arm (14.6%) and 21 patients in the SMWC-arm (12.1%)  
40 60 achieved wound closure ( $p=0.53$ ). Wound closure time was not significantly different between the treatment  
41 61 arms ( $p=0.244$ ). 96 patients in the NPWT-arm and 72 patients in the SMWC-arm had at least one adverse event  
42 62 ( $p=0.007$ ), but only 11 events have been possibly related to NPWT. Documentation deficiencies, premature  
43 63 cessation of NPWT and temporary changes of the randomized treatment had a negative impact on the outcome  
44 64 wound closure.

45  
46 **65 Conclusions**

47  
48 66 NPWT was not superior to SMWC in diabetic foot wounds in clinical practice. Overall wound closure rate was  
49 67 low. Deviations from guidelines limit the treatment success.

50  
51 **68 Trial registration**

52  
53 69 Clinical Trials.gov: NCT01480362

54  
55  
56  
57  
58  
59  
60 70

## 71 **Strengths and limitations of this study**

- 72 • The DiaFu study included patients with diabetic foot ulcers both with peripheral neuropathy and  
73 peripheral arterial occlusive disease, which corresponds to the typical mixed patient population in  
74 clinical practice and enables a general statement about effectiveness and safety of NPWT in the typical  
75 medical care situation.
- 76 • The study does not provide any information on the effectiveness of NPWT in specific patient groups,  
77 which was not intended and may be seen as a limitation.
- 78 • In this health services research study hospitals and outpatient facilities were selected by means of a  
79 qualification checklist and clinical investigators were obliged to provide patients with the best clinical  
80 practice in compliance with all relevant guidelines, but there was no active monitoring of the  
81 implementation of these guidelines.
- 82 • To ensure the best quality of local wound treatment and to achieve optimal baseline conditions, the  
83 study sites were trained for both NPWT and SMWC, but treatment application was at the discretion of  
84 the clinical investigators.
- 85 • Methods against bias were applied whenever possible, but due to the nature of the compared treatment  
86 methods, a direct blinding of patients and clinical investigators was not possible and blinded outcome  
87 assessment could only be implemented for the endpoints wound closure and wound size development  
88 over time by means of wound photographs.

## 90 **Background**

91 The diabetic foot ulcer is one of the most important examples of chronic wounds which in case of severe  
92 complications can lead to leg amputation or death. It is estimated that more than 400 million people worldwide  
93 suffer from diabetes [1, 2] and about 15% of all these patients will develop a diabetic foot ulcer during their  
94 lifetime [3, 4]. Furthermore, approximately 50-70% of all lower limb amputations are due to diabetes [4]. A  
95 large number of medical products are available for wound treatment. Only a few modern moist wound dressings  
96 and topical agents have been convincingly shown to achieve higher wound closure rates compared with  
97 traditional wet gauze dressings in patients with diabetic foot wounds [5]. Also for other ulcer types there is an  
98 uncertainty which dressings and topical agents are most effective for treatment [6]. Innovative medical devices  
99 have a high potential for effective modern wound care. Negative pressure wound therapy (NPWT) is one of the  
100 most commonly used and well-established technologies with the aim to promote wound healing [7]. The first

1  
2  
3 101 use of vacuum sealing was described in 1993 by Fleischmann et al. [8] and the commercially available product  
4  
5 102 was developed later in the 1990s [9, 10]. Positive effects of NPWT on wound healing have been suggested in  
6  
7 103 various basic studies [10, 11]. At the time of planning the DiaFu-study, the clinical evidence largely consisted of  
8  
9 104 clinician perception, case reports and series, small cohort studies, and weakly-powered or low-quality  
10  
11 105 randomized trials that documented broad use of NPWT in various clinical settings and constituted a substantial  
12  
13 106 number of publications but an overall small amount of evidence [12-15]. Two trials performed by Armstrong  
14  
15 107 2005 [16] and Blume 2008 [17] provided a solid basis for planning a study that meets national and international  
16  
17 108 quality requirements. Several systematic and technical reviews on the use of NPWT for post-surgical and  
18  
19 109 chronic wounds have been performed in recent years.

20 110 A specific review for the use of NPWT in diabetic foot wounds performed by Dumville et al in 2013 [18], an  
21  
22 111 assessment in the home setting by Rhee et al. in 2014 [19] and a health technology assessment particularly issued  
23  
24 112 for the evaluation of NPWT for managing diabetic foot ulcers [20] in 2014, as well as the most recent work of  
25  
26 113 Liu et al in 2017 [21, 22] all concluded that although NPWT may have a positive effect, the trials that have been  
27  
28 114 performed have methodological flaws and sufficient, unbiased evidence of whether wounds heal better or worse  
29  
30 115 with NPWT than with conventional treatment is still missing.

31 116 In Germany, the issue of evidence for efficacy and safety of NPWT in acute and chronic wounds was first  
32  
33 117 addressed in 2002 when it was to be decided whether NPWT could be reimbursed without restrictions in  
34  
35 118 outpatient care. The German Federal Joint Committee (German: Gemeinsamer Bundesausschuss [G-BA])  
36  
37 119 commissioned systematic reviews and meta-analyses to the national institute for quality and efficiency in health  
38  
39 120 care (German: Institut für Qualität und Wirtschaftlichkeit im Gesundheitswesen [IQWiG]). Reports were  
40  
41 121 published in 2006 and 2007 by the IQWiG and the G-BA concluded that the body of evidence available was  
42  
43 122 insufficient to clearly proof an additional benefit of NPWT.

44  
45 123 Finally in 2007, the G-BA decided to evaluate the treatment method NPWT within a so-called model project.  
46  
47 124 This included the conduct of clinical studies. The G-BA defined basic requirements for the overall project.  
48  
49 125 Further quality requirements were based on IQWiG's general methods [23]. This essentially concerned the  
50  
51 126 formulation of a study hypothesis that supports G-BA's overall question if NPWT can be reimbursed in German  
52  
53 127 outpatient care without any limitation; the selection of a comparator that represents the current treatment  
54  
55 128 standard in Germany; and implementation of all measures to ensure a sufficient certainty of results.

56 129 Following the announcement of the G-BA, the German statutory health insurance funds initiated an overall  
57  
58 130 project through a European tender in which the treatment benefit of NPWT should be evaluated in acute and  
59  
60 131 chronic wounds. The diabetic foot ulcer has been chosen to be evaluated as representative for chronic wounds in

1  
2  
3 132 a randomized controlled clinical superiority study comparing the effectiveness of NPWT and SMWC in clinical  
4  
5 133 practice.  
6  
7  
8  
9  
10  
11  
12  
13  
14  
15  
16  
17  
18  
19  
20  
21  
22  
23  
24  
25  
26  
27  
28  
29  
30  
31  
32  
33  
34  
35  
36  
37  
38  
39  
40  
41  
42  
43  
44  
45  
46  
47  
48  
49  
50  
51  
52  
53  
54  
55  
56  
57  
58  
59  
60

For peer review only

1  
2  
3 **134 Methods**

4  
5 135

6  
7 **136 Aim of the study**

8  
9 137 The aim of our DiaFu-study was to evaluate whether the effectiveness and safety of NPWT is superior to  
10 138 standard moist wound care (SMWC) in real-life clinical practice. Unlike previous studies, in this health care  
11 139 research study with a pragmatic approach the question should be answered as to whether the treatment method is  
12 140 effective and safe when used under routine conditions.

13  
14  
15  
16 141

17  
18 **142 Study Design**

19  
20 143 The DiaFu-study was a German-national, multicenter, randomized controlled clinical superiority trial with  
21 144 blinded assessment of wound closure, wound size and wound tissue qualities using photographs. This German  
22 145 national study was conducted both in hospital departments and outpatient facilities with a special qualification  
23 146 for diabetic foot care. Study treatment was allowed to be started both in in- and outpatient care and should be  
24 147 continued outpatient whenever possible. Ethical approval of the Lead Ethical Committee of the University of  
25 148 Witten/Herdecke has been fully granted without any conditions. More detailed information on the study design  
26 149 can be found in the study protocol publication that is available open access [24].

27  
28  
29  
30  
31  
32 150

33  
34  
35 **151 Patient and Public Involvement**

36 152 Patients were not involved in the design, recruitment or conduct of the study. The results of this study will not be  
37 153 disseminated directly to study participants.

38  
39  
40 154

41  
42  
43 **155 Participants**

44  
45 156 In order to conduct a pragmatic trial comparing NPWT and SMWC in patients with diabetes and foot wounds, a  
46 157 patient population was included that largely corresponded to clinical routine. In- and exclusion criteria have been  
47 158 selected based on manufacturers' contraindications and FDA warnings, the necessity to excluded patients in need  
48 159 of protection and who are unable to give their consent, and the intention to avoid general study-related influences  
49 160 on the results.

50  
51 161 Adult patients (age >18 years) with at least 4-week-old chronic diabetic foot ulcers corresponding to Wagner 2 to  
52 162 4 were screened for study participation by the local investigators. Before inclusion, the study protocol required  
53 163 either a debridement or, if necessary, an amputation of foot parts, or at least a thorough wound cleansing,  
54 164 depending on the individual needs of the patients, in order to achieve the optimal outcome of wound treatment.

1  
2  
3 165 Thus, chronic diabetic foot wounds after adequate wound pretreatment as well as post-surgical amputation  
4  
5 166 wounds below the upper ankle joint were eligible for inclusion. The initially planned minimum ulcer age of 6  
6  
7 167 weeks was reduced to 4 weeks during the course of the study. Patients estimated to be at risk of non-compliance  
8  
9 168 with study requirements, with wounds with necrotic tissue present that could not be removed by debridement or  
10  
11 169 amputation, with exposed blood vessels within or directly surrounding the wound not possible to be sufficiently  
12  
13 170 covered or with an increased risk of bleeding with hemodynamic consequences, and outpatients receiving  
14  
15 171 anticoagulation therapy or suffering from a high grade impaired clotting function with a heightened risk of  
16  
17 172 bleeding with hemodynamic consequences were excluded from the DiaFu-study. The use of NPWT devices on  
18  
19 173 the study wound within six weeks prior to study start represented an exclusion criterion in order to demonstrate a  
20  
21 174 clear therapeutic effect of each treatment arm.

22 175 Written informed consent was obtained from every participant after being informed about all aspects of the trial  
23  
24 176 and before randomization and any trial-related procedure. As the statutory health insurance funds provided  
25  
26 177 integrated care contracts for outpatient NPWT, it was only possible to include patients in the study who were  
27  
28 178 members of a participating health insurance fund.

29  
30 179 Basic data were collected for all patients considered for study participation during screening and have been  
31  
32 180 updated during the randomization visit. Study sites have been selected based on their qualifications and  
33  
34 181 experiences using a pre-study qualification checklist and annual quality reports of the respective institution (if  
35  
36 182 available).

37  
38 183

#### 39 184 **Randomization and masking**

40  
41 185 Patients were randomly allocated to the treatment arms in a 1:1 ratio using a computer generated list located on a  
42  
43 186 centralized web-based tool. The randomization list consisted of permuted blocks of variable length (4, 6) which  
44  
45 187 were randomly arranged. Patients were stratified by study site and by Wagner-Armstrong stage within each site  
46  
47 188 (<Wagner-Armstrong stage 2C and  $\geq$  Wagner-Armstrong stage 2C). The randomization lists were generated with  
48  
49 189 the help of a self-created Java program and integrated into the study database. Each registered investigator  
50  
51 190 received individual access to the randomization tool via the study website, but without knowledge of future  
52  
53 191 treatment assignment, which provided adequate allocation concealment. The investigators were responsible for  
54  
55 192 adequately implementing the assigned therapy. Due to the physical differences between the treatment regimens it  
56  
57 193 was not possible to blind either participant or physician to the treatment assignment. Verification of complete  
58  
59 194 wound closure was performed by independent, blinded assessment of wound photographs. Determination of  
60

1  
2  
3 195 wound size and percentage wound tissue quality was also performed by central, blinded outcome assessors based  
4  
5 196 on the wound photographs using the Wound Healing Analyzing Tool (W.H.A.T.).  
6

7 197

8  
9 198 **Procedures**

10 199 Before randomization and start of study treatment all patients underwent one or more of the following no longer  
11  
12 200 than six hours before randomization: amputation, debridement or thorough wound cleansing. Patients received  
13  
14 201 an extensive examination of overall health status, specific diabetes associated disorders, and relevant influence  
15  
16 202 factors on wound healing during screening with an update at the randomization visit. Study therapy was allowed  
17  
18 203 to be started either in-hospital or as outpatient and was intended to be continued in outpatient care whenever  
19  
20 204 possible.  
21  
22

23 205 In the intervention group commercially available CE-marked NPWT devices of the manufacturers Kinetic  
24  
25 206 Concepts Incorporated (KCI) and Smith & Nephew were used in the discretion of the clinical investigator  
26  
27 207 according to clinical routine and manufacturer's instructions [24]. Recommendations for use can be found on the  
28  
29 208 manufacturers' websites. As part of the European tender for the overall project, the German statutory health  
30  
31 209 insurance funds awarded lots for the provision of the medical products by the respective manufacturers.  
32  
33 210 Germany was divided into 4 supply areas. During the award procedure, Smith & Nephew received 1 lot and KCI  
34  
35 211 3 lots. Thus, devices and consumables of Smith & Nephew were used for the north and northern east region of  
36  
37 212 Germany and for the rest of Germany the therapy systems of KCI were used. Within the study, NPWT was  
38  
39 213 required to be used for wound bed preparation in order to achieve at least 95% granulation of the wound area.  
40  
41 214 After optimal preparation of the wound, complete closure could be achieved either by secondary intention with  
42  
43 215 dressings or by surgical closure with subsequent removal of the suture. Control therapy was defined as any  
44  
45 216 SMWC according to local clinical standards and guidelines [25, 26]. Healthcare providers were obligated to  
46  
47 217 provide patients with best practice. In the control arm it was permitted to apply any local wound treatment  
48  
49 218 standard used in the respective study site that did not have an experimental status or was NPWT. To ensure the  
50  
51 219 best quality of local wound treatment, the study sites were trained for both the intervention arm by the  
52  
53 220 manufacturers and the control arm by the German Society for Wound Healing and Wound Treatment which  
54  
55 221 provided parts of its curriculum and experienced instructors.

56 222 The maximum study treatment time was 16 weeks after randomization. Study visits needed to be performed at  
57  
58 223 week one, three, five, 12 and 16 and included a complete wound examination. Wound closure was possible to be  
59  
60 224 achieved at any time within the study treatment period of 42 days and had to be documented in a wound closure  
225 visit as well as in a wound closure confirmation visit after 14 days. Study participants were followed up until 6



1  
2  
3 226 months after randomization. The initially planned follow-up period of 12 months was reduced to 6 months in the  
4  
5 227 course of the study. The amendment to the study protocol was endorsed by the Ethics Committee and  
6  
7 228 immediately communicated to all participating study sites.  
8

9 229

## 10 230 **Outcomes**

11  
12 231 Our primary outcome comprised the two primary effectiveness endpoints wound closure rate and the time until  
13  
14 232 complete wound closure within a maximum study treatment period of 16 weeks. Complete wound closure was  
15  
16 233 defined as 100% epithelialization of the wound, no drainage, no suture material and no need for wound dressing  
17  
18 234 or adjuvants. Wound closure needed to sustain a minimum of 14 days after the first diagnosis and to be  
19  
20 235 confirmed by independent blinded observers using wound photographs. If wound closure was achieved by  
21  
22 236 surgical methods, the endpoint was not reached until the above criteria were met (e.g. only after removal of the  
23  
24 237 suture). The determination of sufficient wound bed conditioning and the indication for surgical closure was  
25  
26 238 carried out by the treating physician, as in clinical practice. The treating physician was not blinded to treatment  
27  
28 239 allocation. During study planning, the following concomitant diseases and therapeutic measures with a possible  
29  
30 240 influence on the primary study outcome wound closure (confounders) were identified:

31  
32 241 diabetic neuropathic osteoarthropathy (DNOAP), severity of the foot wound according to Wagner Armstrong  
33  
34 242 peripheral arterial occlusive disease , chronic venous insufficiency (CVI), extreme foot deformities and  
35  
36 243 malpositions, untreated or therapy-refractory inflammation in the wound area, chronic anemia, heel necrosis,  
37  
38 244 lymphedema, infection, heightened glycated hemoglobin (HbA1c) level, dialysis, hyperbaric oxygen (HBO) or  
39  
40 245 normothermal therapy, application of recombinant or autologous growth factors to the study wound, and  
41  
42 246 application of skin or dermal substitutes and with living cells that produce growth factors.

43 247 Secondary outcomes were wound closure rate after six months; time until optimal preparation of the wound bed  
44  
45 248 (a minimum of 95% granulation), amputations and resections, wound size and wound tissue composition, pain  
46  
47 249 and quality of life within 16 weeks; and recurrence within six months. The initial planned secondary endpoint of  
48  
49 250 time until wound closure within 6 months was abandoned during the course of the study. It was found that a  
50  
51 251 time-to-event survey was not possible outside the active study treatment period. This was mostly due to the fact  
52  
53 252 that after this 16-week period weekly study visits were no longer an obligation and further patient care was no  
54  
55 253 longer bound to the study site. Only one follow-up visit was planned and carried out after 6 months, in which  
56  
57 254 wound or healing status and recurrences were documented.

58 255 Minor and major amputations were considered separately, whereas the disarticulation at the midtarsal joint  
59  
60 256 (Chopart's amputation) was considered still to be minor. Wound size and wound tissue composition (percentage

1  
2  
3 257 of granulation tissue, fibrin and necrosis) were monitored at each study visit. Quality of life (QoL) was measured  
4  
5 258 using the questionnaire Euro Quol 5D (EQ5D) at inclusion, end of the maximum treatment time or end of the  
6  
7 259 therapy and at the six-month follow-up visit. At each study visit participants were asked to provide their  
8  
9 260 assessment of wound-associated pain on a numerical rating scale (0 to 10). The incidence of serious adverse  
10  
11 261 events (SAEs) within six months and the incidence of device-related and wound-related adverse events occurring  
12  
13 262 within 16 weeks or until wound closure confirmation were safety endpoints of this trial.  
14  
15 263

#### 16 264 **Statistical analysis**

17  
18 265 Sample size calculation was performed using the expected difference between wound closure rates in both  
19  
20 266 treatment arms based on information extracted from previously published studies. Armstrong and Lavery  
21  
22 267 described a rate of complete wound closure in 56% of patients with NPWT and in 39% of patients in the  
23  
24 268 corresponding control group [16]. Blume showed a rate of complete wound closure in 43% of patients treated  
25  
26 269 with NPWT and 29% of patients in the control group [17]. We assumed a complete wound closure rate of 45%  
27  
28 270 for NPWT and 30% in the SMWC group, resulting in a minimum difference of 15% after a treatment time of 16  
29  
30 271 weeks. Based on a type one error of  $\alpha = 0.05$  and a type two error of  $\beta = 0.2$  (corresponding to a power of 80%) a  
31  
32 272 total sample size of 162 patients per group was calculated. The computer program of Dupont and Plummer was  
33  
34 273 used for sample size calculation [27].

35  
36 274 We performed all analyses based on a modified intention-to-treat (ITT) population that includes all randomized  
37  
38 275 participants who have a valid baseline and at least one valid post baseline wound assessment. As a secondary  
39  
40 276 approach a per-protocol (PP) analysis has been performed excluding patients with any serious protocol  
41  
42 277 deviations, temporary changes from SMWC to NPWT, permanent wound treatment changes or without valid  
43  
44 278 documentation until wound closure confirmation or end of maximum treatment time (EOMT). Safety data are  
45  
46 279 presented on an 'as treated' basis. Subgroup analysis is presented for small vs big wound subpopulations. There  
47  
48 280 was no interim analysis.

49 281 The superiority hypothesis was tested in parallel for wound closure rate and time to wound closure  
50  
51 282 within 16 weeks. Incidence of complete wound closure was analyzed using a chi-squared test (Fisher's exact test)  
52  
53 283 comparing the two treatment arms. Time to complete wound closure was compared between the two treatment  
54  
55 284 arms using a log-rank test. The method of Bonferroni-Holm was used for adjustment of the  $\alpha$ -error for parallel  
56  
57 285 confirmatory testing of both primary endpoints. Missing values have been incorporated as censored values.  
58  
59 286 Covariates thought to influence wound closure were analyzed for their effect on the two primary endpoints.  
60  
287 Covariates were excluded from the analysis if the number of missing values was too high. First, the relevant

1  
2  
3 288 covariates were tested by means of a univariate analysis with regard to their effect on wound closure rate and  
4  
5 289 time without consideration of the treatment arms. If there was a significant influence, the frequency of  
6  
7 290 occurrence in the treatment arms was analyzed. Secondary, multivariate analyses were performed for both  
8  
9 291 primary endpoints, taking into account treatment assignment and including all relevant covariates. The  
10  
11 292 multivariate analysis of the primary endpoint wound closure rate was performed with binary logistic regression  
12  
13 293 to describe the influence of the independent covariates (regressors) on the dependent dichotomous variable  
14  
15 294 wound closure. The multivariate analysis of the primary endpoint time to wound closure was performed using a  
16  
17 295 COX regression model.

18 296 Safety and secondary endpoints were analyzed using conventional univariate testing.

19  
20 297 Within a priori planned subgroup analysis the ITT population was divided into a group of small wounds and a  
21  
22 298 group of big wounds based on the wound surface area documented during the randomization visit. Wounds  
23  
24 299 smaller than or equal to the total median wound surface (483 mm<sup>2</sup>) were assigned to the subgroup "small  
25  
26 300 wounds". Patients with wound surface areas larger than the median value were assigned to the subgroup "large  
27  
28 301 wounds". Since no citable scientific definition of a large wound was available at the time of study planning and  
29  
30 302 the clinical experts involved could not make a decision, the median of all wounds was chosen as the criterion for  
31  
32 303 the division into the two subgroups. Confirmatory analysis of primary and secondary endpoints was repeated for  
33  
34 304 the subgroups.

35 305 Missing values for the following outcome parameters were replaced using the Last Observation Carried Forward  
36  
37 306 (LOCF) method: wound closure rate, wound size and wound tissue quality, recurrence and amputation. The  
38  
39 307 outcome parameters time to wound closure and time until optimal preparation of the wound bed did not require  
40  
41 308 data replacement, since missing values are included in the analysis as right-censored values. If the wound closure  
42  
43 309 is not confirmed to be closed after a minimum of 14 days, the wound is considered as an unsustained wound  
44  
45 310 closure. All missing quality of life values (EQ-5D) were replaced with the overall quality of life assessment  
46  
47 311 (visual analogue scale), if available. If there was no quality of life assessment, there was no replacement. For  
48  
49 312 missing values of the demographic and baseline characteristics, which are necessary for the estimation of the  
50  
51 313 regression coefficients, no replacement was performed. IBM SPSS Statistics (version 23) was used for all  
52  
53 314 analyses.

54 315 This study is registered with ClinicalTrials.gov number NCT01480362 and in the German Clinical Trial  
55  
56 316 Registry, number DRKS00003347.

57 317 A data monitoring committee was formed to oversee overall study performance and safety.

58  
59  
60 318

1  
2  
3 **319 Role of the funding source**

4  
5 320 Through a European tender the study was initiated by a consortium of 19 statutory German health insurance  
6  
7 321 funds, which provided integrated care contracts for all study participants and for up to 7000 patients with acute  
8  
9 322 and chronic wounds in Germany; defined basic rules for study design based on the requirements of the German  
10  
11 323 authorities; and provided a critical review of the study protocol and the final report. The study was funded by the  
12  
13 324 manufacturers Kinetic Concepts Incorporated (KCI) and Smith & Nephew (S&N). Both companies provided the  
14  
15 325 NPWT devices and associated consumable supplies in the assigned regions of Germany as well as all necessary  
16  
17 326 support and information about the used material. The manufacturers had no role in study design, data collection,  
18  
19 327 data analysis, data interpretation, or writing of the report. All authors had full access to all of the data (including  
20  
21 328 statistical reports and tables) in the study and take full responsibility for the accuracy of the data analysis.

22 329  
23  
24  
25  
26  
27  
28  
29  
30  
31  
32  
33  
34  
35  
36  
37  
38  
39  
40  
41  
42  
43  
44  
45  
46  
47  
48  
49  
50  
51  
52  
53  
54  
55  
56  
57  
58  
59  
60

1  
2  
3 **330 Results**

4  
5 331 Between Dec 23, 2011 and August 12, 2014 386 patients were enrolled and randomly assigned to receive NPWT  
6  
7 332 (181) or SMWC (187) in the DiaFu-study (**Error! Reference source not found.**) in overall 40 study sites, which  
8  
9 333 recruited minimum 1 patient and maximum 76 patients. A full list of investigator can be found in the appendix.  
10  
11 334 13 clinical investigators randomized more than 10 patients. 23 study sites enrolled only between 1 and 4 patients.  
12  
13 335 Most of these study sites refused further study participation due lack of time and staff for adequately performing  
14  
15 336 the documentation. In the further course of the trial research nurses have been hired by the independent scientific  
16  
17 337 institute overseeing the trial in order to support the documentation in the study sites whenever needed.  
18  
19 338 Baseline characteristics of the patients in the NPWT-and the SMWC-arm are similar in the ITT population  
20  
21 339 (**Error! Reference source not found.**).

| Baseline parameters<br>(ITT population) | Total<br>N=345 (100 %) | NPWT<br>N=171 (49·6%) | SMWC<br>N=174 (50·4%) |
|-----------------------------------------|------------------------|-----------------------|-----------------------|
| Male                                    | 267 of 345 (77·4%)     | 133 of 171 (77·8%)    | 134 of 174(77·0%)     |
| Female                                  | 78 of 345 (22·6%)      | 38 of 171(22·2%)      | 40 of 174(23·0%)      |
| Age (years) (N=345)                     | 67·8 (11·9)            | 67·6 of 171(12·3)     | 68·1 (11·5)           |
| Height (N=340) (in cm)                  | 174·1 (12·4)           | 173·4 (14·6)          | 174·8 (9·9)           |
| Weight (N=335) (in kg)                  | 93·3 (22)              | 92·7 (21·5)           | 93·8 (22·6)           |
| Alcohol                                 | N=341                  | N=169                 | N=172                 |
| Occasionally                            | 157 (46%)              | 83 (48·5%)            | 74 (42·3%)            |
| Chronic                                 | 10 (2·9%)              | 3 (1·8%)              | 7 (4·0%)              |
| No                                      | 174 (51%)              | 83 (48·5%)            | 91 (52%)              |
| Smoking                                 | N=342                  | N=169                 | N=173                 |
| No                                      | 49 (14·3%)             | 25 (14·6%)            | 24 (13·7%)            |
| Yes                                     | 293 (85·7%)            | 144 (84·3%)           | 149 (85·1%)           |
| Number of years (Mean· SD)              | 34·8 (13·5)            | 36·5 (14·9)           | 33·1 (12·1)           |
| Packs / day (Mean)                      | 1·1                    | 1·1                   | 1·2                   |
| Drugs                                   | N=341                  | N=169                 | N=172                 |
| Occasionally                            | 1 (0·3%)               | 1 (0·6%)              | 0                     |
| Chronic                                 | 2 (0·6%)               | 0                     | 2 (1·1%)              |
| No                                      | 338 (97·7%)            | 168 (98·2%)           | 170 (97·1%)           |
| Allergies                               | N=343                  | N=170                 | N=173                 |
| Yes                                     | 37 (10·7%)             | 16 (9·4%)             | 21 (12·0%)            |

|                                                        |                    |                    |                    |
|--------------------------------------------------------|--------------------|--------------------|--------------------|
| No                                                     | 306 (88.4%)        | 154 (90.1%)        | 152 (86.9%)        |
| Subjective assessment of nutritional condition         | N=342              | N=169              | N=173              |
| Well-nourished                                         | 325 (94.2%)        | 162 (94.7%)        | 163 (93.7%)        |
| Moderately malnourished or suspected malnutrition      | 11 (3.2%)          | 4 (2.3%)           | 7 (4%)             |
| Malnourished                                           | 0 (0%)             | 0 (0%)             | 0 (0%)             |
| Localization of the ulcer                              |                    |                    |                    |
| Regio calcanea                                         | 39 (11.3%)         | 17 (9.9%)          | 22 (12.6%)         |
| Dorsum pedis                                           | 20 (5.8%)          | 13 (7.6%)          | 7 (4%)             |
| Planta pedis                                           | 56 (16.2%)         | 30 (17.5%)         | 26 (14.9%)         |
| Metatarsalia                                           | 147 (42.6%)        | 73 (42.7%)         | 74 (42.5%)         |
| Phalanges distales                                     | 64 (18.6%)         | 31 (18.1%)         | 33 (19%)           |
| Phalanges mediales                                     | 28 (8.1%)          | 14 (8.2%)          | 14 (8%)            |
| Phalanges proximales                                   | 40 (11.6%)         | 21 (12.3%)         | 19 (10.9%)         |
| Hallux                                                 | 42 (12.2%)         | 24 (14%)           | 18 (10.3%)         |
| Digitus pedis II                                       | 22 (6.4%)          | 10 (5.8%)          | 12 (6.9%)          |
| Digitus pedis III                                      | 14 (4.1%)          | 7 (4.1%)           | 7 (4%)             |
| Digitus pedis IV                                       | 20 (5.8%)          | 7 (4.1%)           | 13 (7.5%)          |
| Digitus minimus                                        | 25 (7.2%)          | 12 (7%)            | 13 (7.5%)          |
| Type of ulcer                                          |                    |                    |                    |
| Primary ulcer                                          | 279 of 342 (80.9%) | 136 of 170 (79.5%) | 143 of 172 (82.2%) |
| Recurrence                                             | 63 of 342 (18.3%)  | 34 of 170 (19.9%)  | 29 of 172 (16.7%)  |
| Duration of ulcer (days)                               |                    |                    |                    |
| N                                                      | 335                | 168                | 167                |
| Mean (SD)                                              | 189.7 (360.2)      | 217.1 (458.1)      | 162.1 (220)        |
| Median                                                 | 83                 | 81                 | 85                 |
| Min – Max                                              | 0 – 4468           | 0 – 4468           | 0 – 1826           |
| Wound surface area at randomization (cm <sup>2</sup> ) |                    |                    |                    |
| Mean (SD)                                              | 1101 (2543)        | 1060 (1536)        | 1141 (3247)        |
| Min-Max                                                | [12 – 40773]       | [20 – 13188]       | [12 – 40773]       |

340 Table 1: The table shows patient demographics and baseline characteristics of the ITT- population. Data are N (%), Mean  
 341 (SD), and Minimum – Maximum [Min – Max]. “N=” is stating the number of patients with actual available information.  
 342 Findings, diagnoses and procedures documented by the investigators are presented.

343

344 The baseline of the identified factors possibly influencing wound closure is shown in Table 2.

345

| <b>Confounders at baseline<br/>(ITT population)</b>                                                  | <b>Total<br/>N=345 (100 %)</b> | <b>NPWT<br/>N=171 (49·6%)</b> | <b>SMWC<br/>N=174 (50·4%)</b> |
|------------------------------------------------------------------------------------------------------|--------------------------------|-------------------------------|-------------------------------|
| Presence of neuropathy (sensation loss according to the PEDIS classification system)                 | 250 of 334 (72·5%)             | 125 of 166 (73·1%)            | 125 of 168 (71·8%)            |
| Presence of a diabetic neuropathic osteoarthropathy (DNOAP)                                          | 61 (17·7%)                     | 30 (17·5%)                    | 31 (17·8%)                    |
| Wagner grading of the ulcer                                                                          |                                |                               |                               |
| 1 - Superficial ulcer of skin or subcutaneous tissue                                                 | 6 (1·7%)                       | 2 (1·2%)                      | 4 (2·3%)                      |
| 2 - Ulcers extend into tendon, bone, or capsule                                                      | 225 (65·2%)                    | 110 (64·3%)                   | 115 (66·1%)                   |
| 3 - Deep ulcer with osteomyelitis, or abscess                                                        | 85 (24·6%)                     | 45 (26·3%)                    | 40 (23%)                      |
| 4 - Gangrene of toes or forefoot                                                                     | 26 (7·5%)                      | 13 (7·6%)                     | 13 (7·5%)                     |
| 5 - Midfoot or hindfoot gangrene                                                                     | 3 (0·9%)                       | 1 (0·6%)                      | 2 (1·1%)                      |
| Presence of peripheral arterial occlusive disease (PAOD)                                             | 244 of 345 (70·7%)             | 121 of 171 (70·8%)            | 123 of 174 (70·7%)            |
| Rutherford classification for chronic limb ischemia (Grade/Category)                                 |                                |                               |                               |
| 0/0 Asymptomatic—no hemodynamically significant occlusive disease                                    | 20 of 244 (8·2%)               | 8 of 121 (6·6%)               | 12 of 123 (9·8%)              |
| I/1 Mild claudication                                                                                | 31 of 244 (12·7%)              | 16 of 121 (13·2%)             | 15 of 123 (12·2%)             |
| I/2 Moderate claudication                                                                            | 20 of 244 (8·2%)               | 6 of 121 (5·0%)               | 14 of 123 (11·4%)             |
| I/3 Severe claudication                                                                              | 5 of 244 (2·0%)                | 2 of 121 (1·7%)               | 3 of 123 (2·4%)               |
| II/4 Ischemic rest pain                                                                              | 1 of 244 (0·4%)                | 1 of 121 (0·8%)               | 0 of 123 (0·0%)               |
| III/5 Minor tissue loss—non-healing ulcer· focal gangrene with diffuse pedal ischemia                | 163 of 244 (66·8%)             | 87 of 121 (71·9%)             | 76 of 123 (61·8%)             |
| III/6 Major tissue loss—extending above transmetatarsal level· functional foot no longer salvageable | 4 of 244 (1·6%)                | 1 of 121 (0·8%)               | 3 of 123 (2·4%)               |
| No chronic venous insufficiency (CVI)                                                                | 259 of 302 (75·1%)             | 132 of 150 (77·2%)            | 127 of 152 (73%)              |
| CVI Widmer I                                                                                         | 25 of 302 (7·2%)               | 11 of 150 (6·4%)              | 14 of 152 (8%)                |
| CVI Widmer II                                                                                        | 12 of 302 (3·5%)               | 3 of 150 (1·8%)               | 9 of 152 (5·2%)               |
| CVI Widmer III                                                                                       | 6 of 302 (1·7%)                | 4 of 150 (2·3%)               | 2 of 152 (1·1%)               |
| Presence of extreme foot deformities and malpositions of toes, foot or the entire limb               | 59 of 342 (17·1%)              | 26 of 170 (15·2%)             | 33 of 172 (19%)               |
| Untreated or therapy-refractory inflammation in the wound area                                       | 15 of 343 (4·3%)               | 7 of 170 (4·1%)               | 8 of 173 (4·6%)               |
| Presence of a heel necrosis                                                                          | 23 of 342 (6·7%)               | 10 of 168 (5·8%)              | 13 of 174 (7·5%)              |

|                                                                                             |                    |                    |                    |
|---------------------------------------------------------------------------------------------|--------------------|--------------------|--------------------|
| No lymphedema                                                                               | 282 of 340 (81·7%) | 139 of 167 (81·3%) | 143 of 173 (82·2%) |
| Primary lymphedema                                                                          | 12 of 340 (3·5%)   | 5 of 167 (2·9%)    | 7 of 173 (4%)      |
| Secondary lymphedema                                                                        | 46 of 340 (13·3%)  | 23 of 167 (13·5%)  | 23 of 173 (13·2%)  |
| Clinical signs of inflammation (suspected infection)                                        | 159 of 344 (46·1%) | 83 of 170 (48·5%)  | 76 of 174 (43·7%)  |
| Local wound swab as part of the clinical routine                                            | 248 of 343 (71·9%) | 126 of 170 (73·7%) | 122 of 173 (70·1%) |
| Detection of germs within the local wound swab                                              | 205 of 247 (59·4%) | 104 of 125 (60·8%) | 101 of 122 (58%)   |
| Hemoglobin                                                                                  |                    |                    |                    |
| N                                                                                           | 177 of 345         | 86 of 171          | 91 of 174          |
| Mean (SD)                                                                                   | 9·5 (3,2)          | 9·6 (3·1)          | 9·4 (3·3)          |
| Hemoglobin A1c (HbA1c)                                                                      |                    |                    |                    |
| N                                                                                           | 32 of 345          | 13 of 171          | 19 of 174          |
| Mean (SD)                                                                                   | 15·6 (18,3)        | 16·8 (16,7)        | 14·7 (19·6)        |
| Requiring dialysis                                                                          | 29 of 343 (8·4 %)  | 15 of 170 (8·8%)   | 14 of 173 (8·0%)   |
| Application of skin or dermal substitutes and with living cells that produce growth factors | 0 of 341 (0%)      | 0 of 169 (0%)      | 0 of 172 (0%)      |

346 Table 2: The table shows the baseline of the identified factors possibly influencing wound closure in the ITT- population.  
 347 Findings, diagnoses and procedures documented by the investigators are presented. Data are N (%), Mean (SD), and  
 348 Minimum – Maximum [Min – Max].  
 349

| <b>Revascularization before study start</b>    | <b>Total<br/>N=345 (100 %)</b> | <b>NPWT<br/>N=171 (49·6%)</b> | <b>SMWC<br/>N=174 (50·4%)</b> |
|------------------------------------------------|--------------------------------|-------------------------------|-------------------------------|
| Performed revascularization before study start | 23 of 345 (6·7%)               | 9 of 171 (5·3%)               | 14 of 174 (8·0%)              |
| Percutaneous transluminal angioplasty (PTA)    | 13 of 23 (57%)                 | 6 of 9 (67%)                  | 7 of 9 (50%)                  |
| PTA + Stent                                    | 1 of 23 (4%)                   | 0 of 9 (0%)                   | 1 of 9 (7%)                   |
| Veins-Bypass                                   | 5 of 23 (22%)                  | 2 of 9 (22%)                  | 3 of 9 (21%)                  |
| Polytetrafluoroethylene (PTFE) Bypass          | 1 of 23 (4%)                   | 0 of 9 (0%)                   | 1 of 9 (7%)                   |
| Thromboendarterectomy and patch plastic        | 2 of 23 (9%)                   | 0 of 9 (0%)                   | 2 of 9 (14%)                  |
| Revascularization with influence on the wound  | 22 of 23 (96%)                 | 9 of 9 (100%)                 | 13 of 14 (93·9%)              |



|                                         |                |              |                |
|-----------------------------------------|----------------|--------------|----------------|
| Sufficient revascularization result     | 20 of 23 (88%) | 7 of 9 (78%) | 13 of 14 (93%) |
| Insufficient revascularization result   | 2 of 23 (9%)   | 1 of 9 (11%) | 1 of 14 (7%)   |
| Revascularization result not assessable | 1 of 23 (4%)   | 1 of 9 (11%) | 0 of 14 (0%)   |

Table 3: The table shows revascularization performed in the ITT- population before study start. Data are N (%).

350

### 351 Results for the primary outcomes in the ITT population

352 In the ITT population, the overall number of patients with wounds closed within 16 weeks was 46 of 345  
 353 (13·3%). Wound closure rate was higher in the NPWT arm (14·6%) than in the SMWC arm (12·1%) but this  
 354 was not significant (p 0·53) as the difference in healing rate between the two groups was only four patients  
 355 (2·5%) (Table 4). Wounds treated with NPWT were approximately at the same risk of remaining open like  
 356 patients receiving SMWC (RR 0·97 [95% CI: 0·89-1·06]).

357

| Wound closure rate                                            | Total<br>N=345             | NPWT<br>N=171           | SMWC<br>N=174           | p        |
|---------------------------------------------------------------|----------------------------|-------------------------|-------------------------|----------|
| Patients with wound closure within 16 weeks<br>N (%) [95% CI] | 46 (13·3 %) [9·76 – 17·78] | 25 (14·6%) [9·5 – 21·6] | 21 (12·1%) [7·5 – 18·4] | 0·53 (F) |

Table 4: The table shows the wound closure rate for the ITT-population. Data show the number (N) of participants available for the analysis in total and for both treatment arms. Wound closures within the maximum study treatment time of 16 weeks are shown with the number (N), the percentage (%) of patients, and the 95% Confidence Interval (CI). F=Fisher's Exact Test.

358

359 Beginning in week five the number of study patients with open wounds in the NPWT-arm was lower than in the  
 360 SMWC-arm (Figure 2). There is no significant difference in the wound healing time between the two treatment  
 361 arms (p = 0·244, Log Rank Test). Since the cumulative number of patients with open wounds was more than  
 362 70% after 16 weeks, we were not able to calculate medians for time to wound closure.

363

### 364 Results for the secondary outcomes in the ITT population

365 After 6 months the wound closure rate was higher in the SMWC- than in the NPWT-arm (36 of 174 [20·7 %] vs  
 366 24 of 171 [14· 0 %]), but the difference was not significant (p 0·12).

367

368

369

370

371

372 The time until optimal preparation of the wound for further treatment to achieve a complete epithelization (min  
373 95 % granulation tissue) was significantly shorter for patients treated with NPWT (p 0·021) (Table 5).

374

| <b>Time until optimal preparation of the wound bed (min 95 % granulation tissue)</b> | <b>Total<br/>N=183</b> | <b>NPWT<br/>N=100</b> | <b>SMWC<br/>N=83</b> | <b>p</b>     |
|--------------------------------------------------------------------------------------|------------------------|-----------------------|----------------------|--------------|
| Mean (SD)                                                                            | 42·7 (39·0)            | 35·6 (34·6)           | 51·4 (42·6)          | <b>0·008</b> |
| Median (IQR)                                                                         | 31 (64)                | 22·0 (48·0)           | 49·0 (53·6)          |              |
| Min - Max                                                                            | 0 - 127                | 0 - 127               | 0 - 115              |              |

375 Table 5: The table shows time until optimal preparation of the wound for further treatment (min 95 % granulation tissue for  
376 the ITT-population. Data show the number (N) of participants available for the analysis in total and for both treatment arms.  
377 Time until optimal preparation of the wound is described with mean (SD); median (IQR); and minimum (min) and maximum  
378 (max).

379

380 In the ITT-population wound surface area and wound volume decreased continuously during the study treatment  
381 time of 16 weeks in both treatment arms. The values are largely scattered. Detailed information about the course  
382 of wound surface area, volume and composition of tissues for both study populations can be found in the  
383 respective tables in the appendix. Wound surface area at each observation time point until end of maximum  
384 study treatment time of maximum of 16 weeks is separately shown for the calculated data from width and length  
385 as documented in the eCRF and for the data derived from the photo analysis. The results of the blinded photo  
386 analysis using the Wound Healing Analyzing Tool (W.H.A.T.) were smaller than the values documented by the  
387 clinical investigators. Starting from a similar wound volume, the values also decreased continuously both in the  
388 NPWT- and in the SMWC-arm, wherein the values are smaller in the NPWT-arm than in the SMWC-arm at  
389 each observation time point.

390

391 Wound tissue composition is similar in both treatment arms at baseline. Granulation tissue values increase  
392 during the study treatment period of 16 weeks and fibrin values decrease, with clinically documented values  
393 showing only minor differences between treatment arms. The values for necrotic tissue were very low and did  
394 not differ relevantly between the treatment arms. The results of the W.H.A.T. evaluation for granulation and  
395 fibrin deviate markedly from the values documented by the clinical investigators. Contrary to the clinically  
396 documented values, the W.H.A.T. evaluation shows low values for granulation and high values for fibrin.

397

398 No recurrences occurred during the study treatment time of 16 weeks. Between the end of the maximum study  
 399 treatment time and the follow up at 6 months, 11 recurrences (6.4 %) occurred in the 171 patients in the NPWT  
 400 arm. One patient had two recurrences. In the SMWC arm, five of 174 patients (2.9 %) had a recurrence. The  
 401 difference is not significant (RR 2.24 [95%CI: 0.80-6.31]; (p 0.131)). , but the overall number of 17 recurrences  
 402 in 16 patients was very low.

403  
 404 A total of 102 amputations or resections were performed in 71 patients (table 6). There were 45 amputations in  
 405 35 (20.5%) patients in the NPWT arm and 57 amputations in 36 (20.7 %) patients in the control arm. There is no  
 406 significant difference in the number of patients with amputation or resection (p 1.00) or the overall number of  
 407 performed interventions (p 0.89) between NPWT and SMWC arm. Patients treated with NPWT were  
 408 approximately at the same risk of undergoing an amputation or resection like patients treated with SMWC (RR:  
 409 0.99 [95%CI: 0.65-1.50]). A total of 69 patients (20 %) underwent a minor amputation (NPWT 33 [19.3 %]  
 410 SMWC 36 [20.7 %], p 0.79). Two patients in the NPWT arm and no patient of the SMWC arm underwent a  
 411 major amputation (p 0.25).

412

|                                                                   | <b>Total</b><br>N=345     | <b>UWT</b><br>N=171       | <b>SWT</b><br>N=174       | <b>p</b> |
|-------------------------------------------------------------------|---------------------------|---------------------------|---------------------------|----------|
| <b>Study participants with amputation or resection</b>            | 71<br>20.6% [16.3 – 24,8] | 35<br>20.5% [14,4 – 26,5] | 36<br>20.7% [14.7 – 26,7] | 1.00 (F) |
| <b>Total number of amputations and resections</b>                 | 102                       | 45                        | 57                        | 0.89 (U) |
| <b>Number of amputations and resections per study participant</b> |                           |                           |                           | 0.89 (U) |
| <b>one event</b>                                                  | 49 (14.2%)                | 25 (14.6%)                | 24 (13.8%)                |          |
| <b>two events</b>                                                 | 16 (4.6%)                 | 10 (5.8%)                 | 6 (3.4%)                  |          |
| <b>three events</b>                                               | 4 (1.2%)                  | 0 (0%)                    | 4 (2.3%)                  |          |
| <b>four events</b>                                                | 1 (0.3%)                  | 0 (0%)                    | 1 (0.6%)                  |          |
| <b>five events</b>                                                | 1 (0.3%)                  | 0 (0%)                    | 1 (0.6%)                  |          |
| <b>Study participants with minor amputation</b>                   | 69 (20.0%)                | 33 (19.3%)                | 36 (20.7%)                | 0.79 (F) |
| <b>Study participants with major amputation</b>                   | 2 (0.6%)                  | 2 (1.2%)                  | 0 (0%)                    | 0.25 (F) |

1  
2  
3 413 Table 6: The table shows the number of study participants with amputations / resections and the number of amputations /  
4 414 resections performed for the ITT-population. Data show the number (N) of participants, the percentage with the 95%  
5 415 Confidence Interval (95%CI), or the number of events accompanied with the respective percentage values in total and for  
6 416 both treatment arms. F = Fisher's Exact Test; U = Mann-Whitney U-Test.  
7  
8  
9

10 417  
11  
12 418 Overall, pain levels were very low and decreased further during the study treatment time. The values hardly  
13 419 differ between the treatment arms at any observation time point. A table with pain levels can be found in the  
14 420 appendix.  
15  
16  
17

18 421  
19 422 At baseline Quality of life (EQ5D) had significant limitations in both treatment arms. Patients reaching the end  
20 423 of treatment within 16 weeks showed improved EQ5D levels in the NPWT arm and in the SMWC arm. Similar  
21 424 results have been found for patients who reached the end of the maximum treatment time without successful end  
22 425 of therapy. At the follow-up time after 6-months all patients still show increased EQ5D levels in both treatment  
23 426 arms. A table with detailed results for the EQ5D is provided in the appendix.  
24  
25  
26  
27  
28

29 427  
30  
31 428 Safety results

32  
33 429 269 adverse events (AE) (NPWT 167; SMWC 102) occurred during the active study treatment period of 112  
34 430 days. For 96 (56· 1%) patients in the NPWT group and 72 patients (41· 4%) in the SMWC group at least one  
35 431 adverse event has been documented (p 0·007) but only 16 (10· 2%) of the AEs in the NPWT group were decided  
36 432 by the investigators to have a definite relation to the medical device. A total of 163 AEs occurring within the  
37 433 study observation period of 6 months were classified as serious adverse events (SAE) in the opinion of the  
38 434 investigators (NPWT 87, SMWC 76). In the NPWT arm, 63 patients (36·8 %) had at least one documented SAE.  
39 435 45 patients had one and 18 patients had two or more SAEs. In the SMWC arm, 58 patients (33·3%) had a  
40 436 minimum of one SAE (45 patients with one SAE; 13 patients with two or more SAEs). The difference between  
41 437 the treatment arms was not significant (p 0·50). None of the SAEs in the NWPT group were documented as  
42 438 definitely or possibly related to the medical device by investigators. In one case in the SMWC group the  
43 439 investigator documented a definite relationship between the SAE and SMWC. In one case the investigator  
44 440 documented a possible relationship to SMWC in the NPWT group. Table 7 gives a detailed overview on the AEs  
45 441 documented within the study treatment time of 112 days.  
46  
47  
48  
49  
50  
51  
52  
53  
54  
55  
56  
57  
58  
59  
60

| Adverse Events (AE) | NPWT | SMWC |
|---------------------|------|------|
|---------------------|------|------|

| <b>N=269</b>                                       | <b>N=167</b>      | <b>N=102</b>     |
|----------------------------------------------------|-------------------|------------------|
| Day of occurrence (N)                              | 167               | 102              |
| Mean (SD)                                          | 37.5 (28.6)       | 42.7 (29.2)      |
| Median (IQR)                                       | 30.0 (40.0)       | 38.0 (50.0)      |
| Duration in days (N)                               | 157               | 97               |
| Mean (SD)                                          | 19.7 (29.0)       | 25.3 (38.6)      |
| Median (IQR)                                       | 10.0 (20.0)       | 13.0 (22.0)      |
| Severity (N)                                       | 161               | 102              |
| Mild                                               | 64 (39.8%)        | 24 (23.5%)       |
| Moderate                                           | 54 (33.5%)        | 38 (37.3%)       |
| Severe                                             | 43 (26.7%)        | 40 (39.2%)       |
| AE expected / unexpected (N)                       | 159               | 100              |
| Expected                                           | 52 (32.7%)        | 27 (27.0%)       |
| Unexpected                                         | 107 (67.3%)       | 73 (73.0%)       |
| Relationship to the medical device (N)             | 157               | 100              |
| Yes                                                | 16 (10.2%)        | 0 (0%)           |
| Possible                                           | 11 (7.0%)         | 2 (2.0%)*        |
| No                                                 | 117 (74.5%)       | 94 (94.0%)       |
| Not assessable                                     | 13 (8.3%)         | 4 (4.0%)         |
| * No treatment change to NPWT has been documented. |                   |                  |
| Relationship to SMWC (N)                           | 110               | 75               |
| Yes                                                | 0 (0%)            | 2 (2.7%)         |
| Possible                                           | 5 (4.5%)          | 0 (0%)           |
| No                                                 | 96 (87.3%)        | 67 (89.3%)       |
| Not assessable                                     | 9 (8.2%)          | 6 (8.0%)         |
| Relationship to treatment procedure (N)            | 148               | 96               |
| Yes                                                | 6 (4.1%)          | 4 (4.2%)         |
| Possible                                           | 15 (10.1%)        | 2 (2.1%)         |
| No                                                 | 111 (75.0%)       | 80 (83.3%)       |
| Not assessable                                     | 16 (10.8%)        | 10 (10.4%)       |
| Action taken (N)                                   | 146               | 94               |
| No                                                 | 23 (15.8%)        | 23 (24.5%)       |
| Yes                                                | 123 (84.2%)       | 71 (75.5%)       |
| Cessation of therapy                               | 10 of 123 (8.1%)  | 0 of 71 (0%)     |
| Temporary interruption of therapy                  | 28 of 123 (22.8%) | 2 of 71 (2.8%)   |
| Adaptation of therapy / treatment                  | 52 of 123 (42.3%) | 48 of 71 (67.6%) |
| Other                                              | 33 of 123 (26.8%) | 21 of 71 (29.6%) |
| Outcome (N)                                        | 148               | 96               |
| Fixed without consequences                         | 72 (48.6%)        | 43 (44.8%)       |
| Condition improved                                 | 32 (21.6%)        | 26 (27.1%)       |

|                         |            |            |
|-------------------------|------------|------------|
| Fixed with consequences | 22 (14.9%) | 12 (12.5%) |
| Not fixed               | 4 (2.7%)   | 3 (3.1%)   |
| Death                   | 9 (6.1%)   | 6 (6.3%)   |
| Unknown                 | 9 (6.1%)   | 6 (6.3%)   |

443 Table 7: The table shows the adverse events in the active study treatment time of 112 days after randomization. Data are N  
444 (%), Mean (SD), and Median (IQR). "N=" is stating the number of patients with actual available information.

445

#### 446 Secondary analyses and subgroups

447 The univariate analysis of predefined covariates potentially influencing wound closure in the ITT population  
448 showed that only the presence of an infection at the time of randomization was significantly associated with both  
449 the wound closure rate and time. The influencing factor "infection" was almost equally represented in both  
450 treatment arms (NPWT 35.1 [27.9 – 42.2] % N=60; SCWT 32.8 [25.8 – 39.7] % N= 57), so the treatment  
451 comparison was not influenced by this confounder. Of the a priori defined factors potentially influencing wound  
452 closure nine factors needed to be excluded because the number of missing values was too high or they were  
453 never documented by the investigators. The covariate peripheral arterial occlusive disease had significant  
454 influence on the time until wound closure (p 0.026) and infection had a significant influence on the wound  
455 healing rate (p 0.012). However, both influencing factors were almost evenly distributed over both study arms  
456 by randomization. Thus the group comparison has not been influenced by these confounders.

457 In the ITT population in 173 study participants the median wound surface area was smaller than 484 mm<sup>2</sup> and in  
458 172 study participants wounds were bigger than 484 mm<sup>2</sup>. In the NPWT arm 48.5% (N=83) of patients had  
459 small wounds and 51.5% (N=88) of patients had large wounds. The SMWC arm had 51.7% (N=90) small  
460 wounds and 48.3% (N=84) big wounds. The differences between the treatment arms were not significant.

461 An overview of the measures for small and big wounds and detailed results for this subgroup analysis can be  
462 found in the appendix. In the subgroup of big wounds, wound closure rate was significantly higher in the NPWT  
463 arm within 16 weeks (p 0.08). Patients with big wounds have a lower risk of not achieving wound closure within  
464 16 weeks when treated with NPWT (RR 0.91 [95%CI: 0.82-1.0]). In the subgroup of big wounds a significantly  
465 faster wound closure was achieved in the NPWT arm (p 0.027) (Figure 3). Time until complete, sustained and  
466 verified wound closure was not significantly different between the treatment arms in the subgroup of small  
467 wounds (Figure 4).

468 In the subgroup of small wounds the time to reach 95 % granulation tissue was significantly shorter for the  
469 patients treated with NPWT (p 0.005). Time until optimal wound bed preparation was shorter in the NPWT arm  
470 in the subgroup of big wounds, but did not significantly differ to the result of the SMWC arm (p 0.27). There are  
471 no relevant or significant differences in the overall number of patients with amputation or resection between the

1  
2  
3 472 treatment arms in both subgroups. Both major amputations were performed in patients with big wounds treated  
4  
5 473 with NPWT. Due to the low overall number of recurrences (N=16) we were not able to perform a subgroup  
6  
7 474 analysis for this outcome parameter.  
8

9 475

10  
11 476 Results for the primary and secondary outcomes in the PP population

12  
13 477 In the PP-population patients treated with NPWT showed a 14.5 % higher wound closure rate within 16 weeks  
14  
15 478 than patients treated with SMWC (Appendix), but the difference was not significant (p 0.053). Wounds treated  
16  
17 479 with NPWT had a lower risk of remaining open after 16 weeks (RR 0.82 [95%CI: 0.66-1.03]) than wounds  
18  
19 480 treated with SMWC. Time to wound closure in the NPWT arm was significantly shorter (p=0.004) (Figure 5).  
20  
21 481 After 6 months, wound closure rate in the SMWC-arm was higher than in the NPWT-arm, but the difference was  
22  
23 482 not significant (p 0.84). As in the ITT population, optimal wound bed preparation was achieved significantly  
24  
25 483 faster in patients receiving NPWT (p<0.001). Patients receiving NPWT had a higher risk of recurrence than  
26  
27 484 those in the control group (RR 1.50 [95%CI: 0.37-6.01]), however there was no significant difference between  
28  
29 485 the treatment arms regarding the total number of recurrences (p 0.38) or the number of patients with recurrences  
30  
31 486 (p 0.69). 9 patients in the NPWT group and 21 (21.4%) patients in the SMWC group had an amputation or  
32  
33 487 resection (NPWT RR 1.07 [95%CI: 0.53-2.15]). Neither the number of patients with amputations or resections  
34  
35 488 (NPWT 9 (20.5%) SMWC 21 (21.4%) p 0.83) nor the number of amputations or resections performed (NPWT  
36  
37 489 11 SMWC 28 p 0.86) differ significantly between the treatment arms. No major amputations were performed in  
38  
39 490 the PP population. In the PP-population wound surface area started at smaller baseline levels and decreased  
40  
41 491 faster than in the ITT-population whereas the measures were smaller in the NPWT arm than in the SMWC arm.  
42  
43 492 Wound volume started higher in the NPWT arm and ended at similar levels for the treatment arms after  
44  
45 493 decreasing continuously during the treatment period. This effect was stronger in the SMWC arm. Wound volume  
46  
47 494 measures were lower in the PP-population than in the ITT-population. Wound tissues had a similar course over  
48  
49 495 time like in the ITT population but showed higher values for granulation as well as lower values for fibrin and  
50  
51 496 necrosis in the PP population. Like in the ITT population, pain levels were very low, showing no relevant  
52  
53 497 difference between the treatment arms, and further decreased during the study treatment period. In the PP-  
54  
55 498 population EQ5D values are higher than in the ITT population during screening, but still show that all patients  
56  
57 499 have significant problems. In the NPWT arm QoL measures are similar to those of the SMWC arm for patients  
58  
59 500 reaching end of maximum treatment time before end of therapy. EQ5D shows higher values for patients reaching  
60  
501 the end of therapy during the study treatment time of 16 weeks. Detailed results for the PP population can be  
502  
found in the appendix.



503

504 Additional results on treatment compliance and documentation quality

505 29 (17·0%) patients in the NPWT group had a temporary therapy change to SMWC (mean duration 20·5 ± 21·6  
506 days). In the SMWC group, 17 (9·8%) patients had a temporary therapy change to NPWT (mean duration 28·9 ±  
507 21·6 days). For only 2 of the 29 NPWT patients (6·9%) with a temporary therapy change to SMWC the wound  
508 closure was achieved within 16 weeks, whereas 16·2% (23 von 142) of the wounds of the NPWT patients  
509 without therapy change were completely closed.

510 A total of 57·3% (98 of 171) of the patients randomized to NPWT completed treatment before achieving a  
511 granulation surface of the wound of at least 95%. Fewer patients with this premature end of NPWT (4·7%, N=8)  
512 achieved a complete wound closure than patients with no premature end of therapy (9·9, N=17). Mean NPWT-  
513 duration until premature end of therapy was 28·5 days (SD 24·1), while a mean granulation area of 59·6% (SD  
514 30·5) was achieved.

515 For 131 patients (76·6 %) in the NPWT arm less than the required three dressing changes per week were  
516 documented. 19 patients (14·5 %) with this protocol violation achieved a complete wound closure. Six (15·4%)  
517 of the 39 NPWT patients who received at least 3 therapy changes per week achieved a complete wound closure.

518 In the electronic Case Report Forms (eCRF) a wound closure was documented for 96 patients (NPWT 56 of 171;  
519 SMWC 40 of 174), but only for 46 patients (NPWT 25; SMWC 21) all criteria for a complete, verified and  
520 sustained wound closure have been met. For the wound closure visit seven wound photographs (NPWT 7;  
521 SMWC 0) and for the wound closure confirmation visit four photographs (NPWT 3; SMWC 1) were missing. In  
522 addition, two of the existing wound photographs for the wound closure (NPWT 0; SMWC 2) and two  
523 photographs for the wound closure confirmation (NPWT 1, SMWC 3) were not assessable by the blinded  
524 observers due to serious quality issues. Furthermore 23 (NPWT 15; SMWC 8) existing and assessable wound  
525 photographs were not able to confirm the wound closure and 3 (NPWT 1; SMWC 2) photographs were not able  
526 to confirm the wound closure after 14 days.



## 527 Discussion

528 The DiaFu-study did not demonstrate significant superiority in wound closure rate or time to complete wound  
529 closure for either NPWT or SMWC. Wound closure rates were higher in the NPWT arm but did not significantly  
530 differ from those in the SMWC arm. Optimal preparation of the wound bed (95% granulation tissue) was  
531 achieved significantly earlier when using NPWT in both study populations (ITT and PP), but the overall rate of  
532 wound closures was low. Time to wound healing in the NPWT group is lower than in the SMWC arm while the  
533 difference between the treatment groups becomes statistically significant only in the PP population. Thus, with  
534 this study we were not able to confirm our hypothesis that wound closure can be achieved more often and faster  
535 with NPWT than with SMWC when used in the complex treatment process for diabetic foot ulcers in clinical  
536 practice. Findings of previous RCTs that showed a significant superiority in healing when using NPWT on  
537 amputation and chronic wounds [16, 17] could not be confirmed by this trial. We were able to show that  
538 although significantly more adverse events have been documented in the NPWT group only a small number of  
539 these events were related to the medical device according to the investigator's assessment. Mortality rates were  
540 very low in both groups and there was no significant difference between the treatment arms regarding  
541 amputations and resections performed during the study. Only two major amputations have been performed in  
542 patients with big wounds treated with NPWT. None of the two treatments resulted in an additional impairment of  
543 the patients' quality of life during study treatment time or follow up. Time until complete wound closure was  
544 significantly shorter with NPWT than with SMWC in the subgroup of big wounds, which indicates that NPWT  
545 has the potential to be valuable treatment method for this kind of wounds.

546 The DiaFu-study was designed to evaluate effectiveness and safety of NPWT for chronic diabetic foot wounds in  
547 real-life clinical practice while avoiding any bias that have been described by several systematic reviews [18-22].

548 Methods against bias have been implemented whenever possible, but within this study shortcomings in  
549 documentation quality and missing compliance to therapy guidelines negatively impact the results.

550 None of the previous studies examined the influence of therapy adherence and target-oriented therapy  
551 application on the clinical outcome. Our study is the first to show that temporary therapy changes and premature  
552 therapy cessation have a negative impact on reaching the patient relevant therapy outcome complete wound  
553 healing in study participants treated with NPWT. The results of this additional therapy compliance analysis  
554 indicate that if NPWT is not used with a clear focus and applied consistently under consideration of all  
555 prescriptions of the authorities and the manufacturers, the desired treatment outcome will not be reached.  
556 Together with the poor documentation quality, these circumstances could have led to the fact that the expected  
557 superiority of the NPWT, which was shown in previous studies, could not be achieved in DiaFu-study.

1  
2  
3 558 Not addressing and analyzing all factors influencing the overall treatment outcome like targeted pressure relief,  
4  
5 559 infection control and adequate treatment of the underlying disease during the study treatment and observation  
6  
7 560 period may be seen as a limitation of this health care research study. Study sites have been selected based on a  
8  
9 561 self-disclosure by means of a qualification checklist and cross checks using quality reports. This ensured that all  
10  
11 562 prerequisites were met for guideline-compliant patient care. Nevertheless, even in the application of NPWT there  
12  
13 563 were deviations from the standards. Anyway, questioning the quality of investigators' treatment was not the main  
14  
15 564 focus of this health services research trial. Evaluating the individual treatment quality within a single RCT is  
16  
17 565 neither feasible nor effective.

18 566 Other than previous studies the DiaFu-study evaluated the effectiveness of NPWT most closely to real-life using  
19  
20 567 a patient population as diverse as in clinical practice. The DiaFu-study therefore included patients with chronic  
21  
22 568 diabetic foot ulcers of neuropathic and angiopathic origin, regardless of whether a simple wound cleansing,  
23  
24 569 tissue debridement or even amputation was necessary prior to application of wound therapy targeted to achieve  
25  
26 570 complete wound closure. Thus, results can easier be generalized and applied in routine practice settings, but the  
27  
28 571 problems of the clinical routine also affect data quality and statements about specific patient groups are not  
29  
30 572 possible.

31 573 Some of the previous studies did choose granulation tissue formation for primary outcome. Wound bed  
32  
33 574 preparation and granulation tissue formation are important prerequisites for wound healing, but the selection of a  
34  
35 575 patient-relevant primary endpoint and the implementation of adequate measures against bias as required by the  
36  
37 576 German authorities have been a priority during planning. Preparing the wound bed significantly faster with  
38  
39 577 NPWT is an important result for the therapeutic approach, but is not a proof of effectiveness and cannot serve as  
40  
41 578 a basis for the benefit assessment of NPWT. Thus, complete wound closure needed to be chosen to be the  
42  
43 579 primary outcome rather than the evaluation of the functionality within in the purpose of the evaluated medical  
44  
45 580 device, which is still part of a complex treatment process.

46  
47 581 In order to support the decision making process of the German G-BA on general reimbursement of NPWT in  
48  
49 582 German outpatient care the DiaFu-study was conducted with a population according to the clinical routine  
50  
51 583 without excluding specific patient groups; with therapy application in the discretion of the attending physician;  
52  
53 584 and with evaluation of patient relevant outcome. Within this setting we were not able to show a significant  
54  
55 585 superiority of NPWT for achieving wound closure, but despite all limitations NPWT showed a significant  
56  
57 586 superiority in optimal wound bed preparation. This indicates that NPWT works according to its intended use and  
58  
59 587 has at least a potential to be a valuable treatment alternative. Anyway, in the complex treatment process of the  
60  
588 diabetic wound a satisfactory rate of wound closure was reached with neither NPWT or with SMWC.

1  
2  
3 589  
4  
5 590  
6  
7 591  
8  
9 592  
10  
11 593  
12  
13 594  
14  
15 595  
16  
17 596  
18  
19 597  
20  
21 598  
22  
23 599  
24  
25 600  
26  
27 601  
28  
29 602  
30  
31 603  
32  
33  
34  
35  
36  
37  
38  
39  
40  
41  
42  
43  
44  
45  
46  
47  
48  
49  
50  
51  
52  
53  
54  
55  
56  
57  
58  
59  
60

## Conclusions

NPWT is not superior to SMWC when evaluated in German real-life clinical practice. Missing compliance with therapy guidelines and poor documentation quality led to restrictions in achieving the patient-relevant endpoint complete wound closure and prevents a clear proof of effectiveness. The question if NPWT is superior to SMWC for treating diabetic foot wounds remains unanswered due to the limitations of the DiaFu-study. An overall low number of wound closures indicate problems with the overall treatment quality. The results of the PP-population suggest that without the negative impact of premature treatment cessation, temporary changes of the randomized therapy and partly incomplete documentation, NPWT may be more effective for treating diabetic foot wounds than SMWC. NPWT should be evaluated again after implementation of a sufficient, well-considered and widely-accepted concept for quality control. In a future health care research study the treatment outcome before and after the implementation of these quality measures should be evaluated, for which the results of this trial may serve as a basis. Practitioners worldwide should review their processes with regard to the problems described here.

1  
2  
3 **604 Ethics approval and consent to participate**

4  
5 605 Ethical approval of the main ethical committee (EC): Ethical Committee of the University of Witten-Herdecke,  
6  
7 606 has been fully granted without any conditions. Due to performing the trial according to § 23b MPG (German  
8  
9 607 Medical Device Act), participating study sites in Germany only received a consultation for the main clinical  
10  
11 608 investigator according to professional law by the respective EC. All investigators have been fully approved by  
12  
13 609 the respective ECs. An evaluation of the study's content by ECs of participating study sites in Germany was not  
14  
15 610 applicable. All study participants gave written informed consent prior to randomization and any trial related  
16  
17 611 procedure.

18 612  
19  
20 **613 Data sharing**

21  
22 614 The datasets used and/or analyzed during the current study are available from the corresponding author on  
23  
24 615 reasonable request. Datasets are available in German language.

25 616  
26  
27  
28 **617 Competing interests**

29  
30 618 All authors have completed the ICMJE uniform disclosure form at [www.icmje.org/coi\\_disclosure.pdf](http://www.icmje.org/coi_disclosure.pdf) and  
31  
32 619 declare:

33  
34 620 The German statutory health insurance companies commissioned the Witten/Herdecke University (UW/H) to  
35  
36 621 plan, conduct, analyze and publish the study. Dörthe Seidel is an employee of the UW/H. The study has been  
37  
38 622 financed by the manufacturers KCI (Acelity) and Smith&Nephew. Dörthe Seidel received a consulting fee for  
39  
40 623 the presentation of the study during an event organized by the manufacturer Hartmann. During study planning  
41  
42 624 and conduct Edmund Neugebauer was an employee of the UW/H. He was the director of the IFOM.

43 625 The clinical investigators Martin Storck, Holger Lawall, Gernold Wozniak, Peter Maukner, Dirk Hochlenert,  
44  
45 626 Walter Wetzel-Roth, Klemens Sondern, Matthias Hahn, Gerhard Rothenaicher, Thomas Krönert and Karl Zink  
46  
47 627 received a case fee of 1000 € for each patient included in the DiaFu-study in order to compensate for the  
48  
49 628 additional organizational and especially the documentation effort during trial conduct. Furthermore all  
50  
51 629 investigators received compensation for travelling to the investigator meetings. The institutions of the  
52  
53 630 investigators used integrated care contracts for NPWT during study conduct in order to provide best practice for  
54  
55 631 the study participants during outpatient care.

56  
57 632 Gernold Wozniak and Walter Wetzel-Roth are members of the scientific advisory board of the manufacturer  
58  
59 633 Kinetic Concepts Incorporated (KCI) (now Acelity).

60 634

## 635 **Funding**

636 Through a European tender the study was initiated by a consortium of 19 statutory German health insurance  
637 funds, which provided integrated care contracts for all study participants and for up to 7000 patients with acute  
638 and chronic wounds in Germany; defined basic rules for study design based on the requirements of the German  
639 authorities; and provided a critical review of the study protocol and the final report. The study was funded by the  
640 manufacturers Kinetic Concepts Incorporated (KCI) and Smith & Nephew (S&N). Both companies provided the  
641 NPWT devices and associated consumable supplies in the assigned regions of Germany as well as all necessary  
642 support and information about the used material. The manufacturers had no role in study design, data collection,  
643 data analysis, data interpretation, or writing of the report. All authors had full access to all of the data (including  
644 statistical reports and tables) in the study and take full responsibility for the accuracy of the data analysis.

645

## 646 **Authors' contributions**

647 Dörthe Seidel was the principal coordinating investigator. She conceived the study, reviewed the scientific  
648 literature, and was responsible for study design, data analysis, data interpretation, writing and reviewing of the  
649 report. She is the lead author and takes overall responsibility for this report. She affirms that the manuscript is an  
650 honest, accurate, and transparent account of the study being reported; that no important aspects of the study have  
651 been omitted; and that any discrepancies from the study as originally planned (and, if relevant, registered) have  
652 been explained.

653 Martin Storck and Holger Lawall were study investigators and contributed to study design, data collection and  
654 interpretation, and reviewed the report.

655 Gernold Wozniak, Peter Maukner, Walter Wetzels-Roth and Dirk Hochlenert were study investigators and  
656 contributed to data collection and data interpretation and reviewed the report.

657 Klemens Sondern, Matthias Hahn, Gerhard Rothenaicher, Thomas Krönert and Karl Zink were study  
658 investigators and contributed to data collection and reviewed the report.

659 Edmund Neugebauer contributed to study design and data interpretation and reviewed the report.

660 All authors approved the final version of the report.

661

## 662 **Acknowledgements**

663 The authors thank all investigators, nurses, patients and partners for supporting the study.

664 At least one patient was included in the following facilities: HSK - Dr. Horst Schmidt Kliniken GmbH Klinik für  
665 Gefäßchirurgie Ludwig-Erhard-Straße 100 65199 Wiesbaden; Asklepios Westklinikum Hamburg Zentrum für

- 1  
2  
3 666 Gefäßmedizin Suurheid 20 22559 Hamburg; Knappschaftskrankenhaus Bottrop Gefäßchirurgische Klinik  
4  
5 667 Osterfelderstraße 157 46242 Bottrop; Städtisches Klinikum Karlsruhe Klinik für Gefäß- und Thoraxchirurgie  
6  
7 668 Moltkestraße 90 76133 Karlsruhe; Gemeinschaftspraxis Schlotmann-Hochlenert-Zavaleta-Haberstock  
8  
9 669 Merheimer Straße 217 50733 Köln; Klinikum Döbeln Abt. für Gefäßchirurgie Sörmitzer Straße 10 04720  
10  
11 670 Döbeln; Klinikum Bielefeld Mitte Klinik für Allgemeine Innere Medizin Teutoburger Straße 50 33604 Bielefeld;  
12  
13 671 Klinikum Frankfurt/Oder Klinik für Gefäßchirurgie Müllroser Chaussee 7 15236 Frankfurt/Oder; Weißeritztal-  
14  
15 672 Kliniken GmbH Medizinische Klinik III Bürgerstraße 7 01705 Freital; Krankenhaus Porz am Rhein Klinik für  
16  
17 673 Gefäßchirurgie Urbacher Weg 19 51149 Köln; St. Remigius Krankenhaus Opladen Innere Medizin An St.  
18  
19 674 Remigius 26 51379 Leverkusen; Marien Hospital Dortmund-Hombruch Klinik für Innere Medizin/Diabetologie  
20  
21 675 Gablonzstraße 9 44225 Dortmund; Zentrum für Chirurgie Klinik für Gefäß- und Endovascularchirurgie  
22  
23 676 Theodor-Stern-Kai 7, Haus 23C/EG 60590 Frankfurt am Main; Facharzt für Chirurgie Thorax-  
24  
25 677 Kardiovaskularchirurgie Hindenburgstraße 1 86807 Buchloe; Helfenstein Klinik Geisslingen Allgemein- und  
26  
27 678 Viszeralchirurgie Eybstraße 16 73312 Geislingen/Steige; Paracelsus-Klinik am Silbersee Wundzentrum  
28  
29 679 Hannover Oertzeweg 24 30851 Langenhagen; Klinikum Darmstadt Chirurgische Klinik III Grafenstraße 9 64283  
30  
31 680 Darmstadt; Ortenau Klinikum Offenburg-Ebertplatz Klinik für Allgemein-, Viszeral- und Gefäßchirurgie  
32  
33 681 Ebertplatz 12 77654 Offenburg; Thüringen-Kliniken "Georgius Agricola" GmbH Klinik für Gefäßchirurgie  
34  
35 682 Rainweg 68 07318 Saalfeld; Klinikum Dorothea Christiane Erxleben GmbH Klinik für Allgemein-, Viszeral-  
36  
37 683 und Gefäßchirurgie Ditfurter Weg 24 06484 Quedlinburg; Franziskus-Krankenhaus Berlin Abt. für Innere  
38  
39 684 Medizin Budapester Straße 15-19 10787 Berlin; Hegau-Bodensee Klinikum Radolfzell (HBK) Klinik für Innere  
40  
41 685 Medizin Hausherrenstraße 12 78315 Radolfzell; Diabetologische Schwerpunktpraxis Dr. med. Hansjörg Mühlen  
42  
43 686 & Partner Ruhrorter Straße 195 47119 Duisburg; Kliniken Maria Hilf Mönchengladbach Klinik für  
44  
45 687 Gefäßchirurgie und Angiologie Sandradstraße 43 41061 Mönchengladbach; Städtisches Klinikum  
46  
47 688 München/Bogenhausen Klinik für Endokrinologie, Diabetologie und Angiologie Engelschalkingerstraße 77  
48  
49 689 81925 München; Gerhard Rothenaicher Facharzt für Chirurgie Cosimastraße 2 81927 München; Bürgerhospital  
50  
51 690 Frankfurt am Main Interdisziplinäres Zentrum Diabetischer Fuß (DDG) Nibelungenallee 37- 41 60318 Frankfurt  
52  
53 691 am Main; Gemeinschaftspraxis für Chirurgie und Gefäßmedizin Drs. Alter/Pourhassan/Heim Klosterstraße 12  
54  
55 692 46145 Oberhausen; Ev. KH Königin Elisabeth Herzberge gGmbH Abt. für Kardiologie, Angiologie und  
56  
57 693 Diabetologie Herzbergstraße 79 10365 Berlin; Städtisches Klinikum Neunkirchen gGmbH Abt. für  
58  
59 694 Gefäßchirurgie & Phlebologie Brunnenstraße 20 66538 Neunkirchen; Westküstenklinikum Heide Klinik für  
60  
695 Viszeral- und Gefäßchirurgie Esmarchstraße 50 25746 Heide/Holstein; Chir. Praxisgemeinschaft am  
696 Bayenthalgürtel Praxis Dr. med. Gerald Engels Bayenthalgürtel 45 50968 Köln; Malteser Krankenhaus – St.



1  
2  
3 697 Franziskus-Hospital Medizinische Klinik I, Abt. für Diabetologie Waldstraße 17 24939 Flensburg; St.  
4  
5 698 Marienkrankenhaus Siegen gGmbH Klinik für Gastroenterologie Kampenstraße 51 57072 Siegen; Krankenhaus  
6  
7 699 Bietigheim Klinik für Innere Medizin, Kardiologie, Endokrinologie, Diabetologie und Internistische  
8  
9 700 Intensivmedizin Riedstraße 12 74321 Bietigheim-Bissingen; Asklepios Kliniken Harburg Eißendorfer Pferdeweg  
10  
11 701 52 21075 Hamburg; Diabetologikum Ludwigshafen Diabetes-Schwerpunktpraxis Ludwigsplatz 9 67059  
12  
13 702 Ludwigshafen; Mariannen-Hospital Werl Abt. für Chirurgie Unnaer Straße 15 59457 Werl; Diabetes Klinik  
14  
15 703 GmbH & Co KG Theodor-Klotzbücher-Straße 12 97980 Bad Mergentheim; Institut für Diabetesforschung  
16  
17 704 Münster GmbH Hohenzollernring 70 48145 Münster.

18 705 The study was initiated by a consortium of 19 statutory German health insurance funds represented by the AOK  
19  
20 706 federal association (AOK-Bundesverband – AOK-BV), the association of alternative health insurance funds  
21  
22 707 (Verband der Ersatzkrankenkassen – vdek) and the minors (Knappschaft). In order to guarantee outpatient care  
23  
24 708 for all study participants without any restrictions, the contracting health insurance companies provided integrated  
25  
26 709 care contracts for outpatient negative pressure wound therapy.

27  
28 710 A project advisory board was implemented to coordinate all processes and project partners. The board comprised  
29  
30 711 two representatives each from the statutory health insurance funds, the management company and the sponsor as  
31  
32 712 well as one representative each from the participating medical device manufacturers (KCI and smith & nephew).  
33  
34 713 Representing the contracting authority (statutory German health insurance funds) Dr. Gerhard Schillinger (AOK-  
35  
36 714 BV) and Ute Leonhard (vdek) acted as contact persons for all aspects of the project.

37 715 The management company “Gesundheitsforen Leipzig” has been entirely responsible for the logistics of the  
38  
39 716 study. Central tasks of the management company included the recruitment of study sites and patients, the  
40  
41 717 development of the IT infrastructure including the documentation, communication and invoicing software as  
42  
43 718 well as the processing of all payments.

44  
45 719 The manufacturers Kinetic Concepts Incorporated (KCI) (Acelity) and smith & nephew provided the NPWT  
46  
47 720 devices as well as support and training for the investigators and financed the study.

48  
49 721 The Private University of Witten/Herdecke gGmbH acted as the Sponsor of the trial and the Institute for  
50  
51 722 Research in Operative Medicine with its former director Prof. E.A.M. Neugebauer, the current interim head Prof.  
52  
53 723 Rolf Lefering and the head of the division for clinical research Dörthe Seidel was responsible for the scientific  
54  
55 724 conception, the evaluation as well as the reporting and publication of the study. Prof. Dr. Rolf Lefering was  
56  
57 725 responsible for the statistical planning and analysis. PD Dr. Peter Krüger was responsible for the data  
58  
59 726 management of the study. Special thanks are going to Stefan Bauer, who supported the data management as well  
60  
727 as the statistical analysis and reporting.

1  
2  
3  
4  
5  
6  
7  
8  
9  
10  
11  
12  
13  
14  
15  
16  
17  
18  
19  
20  
21  
22  
23  
24  
25  
26  
27  
28  
29  
30  
31  
32  
33  
34  
35  
36  
37  
38  
39  
40  
41  
42  
43  
44  
45  
46  
47  
48  
49  
50  
51  
52  
53  
54  
55  
56  
57  
58  
59  
60

728 We would like to thank Sophie Thorn, who checked the article as a native English speaker with regard to  
729 spelling and grammar.

For peer review only



1  
2  
3 730 **List of figures:**  
4

5 731 Figure 1: Trial profile (CONSORT)  
6

7 732 Figure 2: Time until complete, sustained and verified wound closure in the ITT-population  
8

9 733 Figure 3: Time until complete, sustained and verified wound closure for the subgroup of big wounds  
10

11 734 Figure 4: Time until complete, sustained and verified wound closure for the subgroup of small wounds  
12

13 735 Figure 5: Time until complete, sustained and verified wound closure in the PP-population  
14

15 736  
16  
17  
18  
19  
20  
21  
22  
23  
24  
25  
26  
27  
28  
29  
30  
31  
32  
33  
34  
35  
36  
37  
38  
39  
40  
41  
42  
43  
44  
45  
46  
47  
48  
49  
50  
51  
52  
53  
54  
55  
56  
57  
58  
59  
60

For peer review only

737 **References**

- 738 1. World Health Organization, *Global report on diabetes*. 2016, WHO:  
739 <http://www.who.int/diabetes/global-report/en/>.
- 740 2. International Diabetes Federation, *IDF Diabetes Atlas*. 2015, IDF: [www.diabetesatlas.org](http://www.diabetesatlas.org).
- 741 3. Yazdanpanah, L., M. Nasiri, and S. Adarvishi, *Literature review on the management of*  
742 *diabetic foot ulcer*. *World J Diabetes*, 2015. **6**(1): p. 37-53.
- 743 4. Leone, S., et al., [*Epidemiology of diabetic foot*]. *Infez Med*, 2012. **20** **Suppl 1**: p. 8-13.
- 744 5. Wu, L., et al., *Dressings for treating foot ulcers in people with diabetes: an overview of*  
745 *systematic reviews*. *Cochrane Database Syst Rev*, 2015(7): p. CD010471.
- 746 6. Norman, G., et al., *Dressings and topical agents for treating venous leg ulcers*. *Cochrane*  
747 *Database Syst Rev*, 2018. **6**: p. CD012583.
- 748 7. Wu, S.C., W. Marston, and D.G. Armstrong, *Wound care: the role of advanced wound-healing*  
749 *technologies*. *J Am Podiatr Med Assoc*, 2010. **100**(5): p. 385-94.
- 750 8. Fleischmann, W., et al., [*Vacuum sealing as treatment of soft tissue damage in open*  
751 *fractures*]. *Unfallchirurg*, 1993. **96**(9): p. 488-92.
- 752 9. Argenta, L.C. and M.J. Morykwas, *Vacuum-assisted closure: a new method for wound control*  
753 *and treatment: clinical experience*. *Ann Plast Surg*, 1997. **38**(6): p. 563-76; discussion 577.
- 754 10. Morykwas, M.J., et al., *Vacuum-assisted closure: a new method for wound control and*  
755 *treatment: animal studies and basic foundation*. *Ann Plast Surg*, 1997. **38**(6): p. 553-62.
- 756 11. Morykwas, M.J., et al., *Effects of varying levels of subatmospheric pressure on the rate of*  
757 *granulation tissue formation in experimental wounds in swine*. *Ann Plast Surg*, 2001. **47**(5): p.  
758 547-51.
- 759 12. Gregor, S., et al., *Negative pressure wound therapy: a vacuum of evidence?* *Arch Surg*, 2008.  
760 **143**(2): p. 189-96.
- 761 13. Peinemann, F. and S. Sauerland, *Negative-pressure wound therapy: systematic review of*  
762 *randomized controlled trials*. *Dtsch Arztebl Int*, 2011. **108**(22): p. 381-9.
- 763 14. Ubbink Dirk, T., et al. *Topical negative pressure for treating chronic wounds*. *Cochrane*  
764 *Database of Systematic Reviews*, 2008. DOI: 10.1002/14651858.CD001898.pub2.
- 765 15. Vikatmaa, P., et al., *Negative pressure wound therapy: a systematic review on effectiveness*  
766 *and safety*. *Eur J Vasc Endovasc Surg*, 2008. **36**(4): p. 438-48.
- 767 16. Armstrong, D.G. and L.A. Lavery, *Negative pressure wound therapy after partial diabetic foot*  
768 *amputation: a multicentre, randomised controlled trial*. *Lancet*, 2005. **366**(9498): p. 1704-10.
- 769 17. Blume, P.A., et al., *Comparison of negative pressure wound therapy using vacuum-assisted*  
770 *closure with advanced moist wound therapy in the treatment of diabetic foot ulcers: a*  
771 *multicenter randomized controlled trial*. *Diabetes Care*, 2008. **31**(4): p. 631-6.
- 772 18. Dumville, J.C., et al., *Negative pressure wound therapy for treating foot wounds in people*  
773 *with diabetes mellitus*. *Cochrane Database Syst Rev*, 2013(10): p. CD010318.
- 774 19. Rhee, S.M., et al., *Negative Pressure Wound Therapy Technologies for Chronic Wound Care in*  
775 *the Home Setting*. 2014, Johns Hopkins University Evidence-based Practice Center: Rockville  
776 (MD).
- 777 20. Canadian Agency for Drugs and Technologies in Health, *Negative Pressure Wound Therapy*  
778 *for Managing Diabetic Foot Ulcers: A Review of the Clinical Effectiveness, Cost-effectiveness,*  
779 *and Guidelines*. 2014: Ottawa (ON).
- 780 21. Liu, S., et al., *Evaluation of negative-pressure wound therapy for patients with diabetic foot*  
781 *ulcers: systematic review and meta-analysis*. *Ther Clin Risk Manag*, 2017. **13**: p. 533-544.
- 782 22. Liu, Z., et al., *Negative pressure wound therapy for treating foot wounds in people with*  
783 *diabetes mellitus*. *Cochrane Database Syst Rev*, 2018. **10**: p. CD010318.
- 784 23. IQWiG. *General Methods*. 2018; Available from:  
785 <https://www.iqwig.de/en/methods/methods-paper.3020.html>.
- 786 24. Seidel, D., et al., *Negative pressure wound therapy versus standard wound care in chronic*  
787 *diabetic foot wounds: study protocol for a randomized controlled trial*. *Trials*, 2014. **15**: p.  
788 334.

- 1  
2  
3 789 25. Bauer, H., et al. *Typ-2-Diabetes: Präventions- und Behandlungsstrategien für*  
4 790 *Fußkomplikationen*. Nationale Versorgungs Leitlinien, 2010.  
5 791 26. Ruttermann, M., et al., *Local treatment of chronic wounds: in patients with peripheral*  
6 792 *vascular disease, chronic venous insufficiency, and diabetes*. Dtsch Arztebl Int, 2013. **110**(3):  
7 793 p. 25-31.  
8 794 27. Dupont, W.D. and W.D. Plummer, Jr., *Power and sample size calculations. A review and*  
9 795 *computer program*. Control Clin Trials, 1990. **11**(2): p. 116-28.

10  
11  
12 796  
13  
14  
15  
16  
17  
18  
19  
20  
21  
22  
23  
24  
25  
26  
27  
28  
29  
30  
31  
32  
33  
34  
35  
36  
37  
38  
39  
40  
41  
42  
43  
44  
45  
46  
47  
48  
49  
50  
51  
52  
53  
54  
55  
56  
57  
58  
59  
60

For peer review only

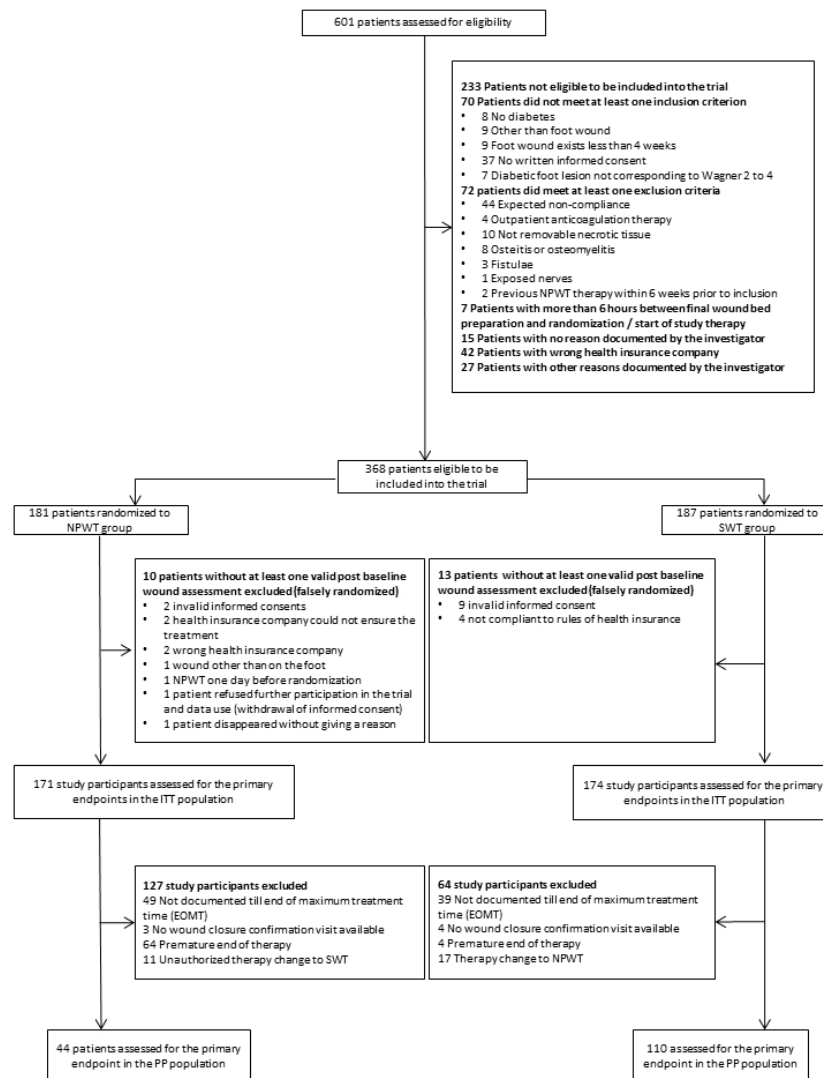

Figure 1: Trial profile (CONSORT)

190x275mm (96 x 96 DPI)

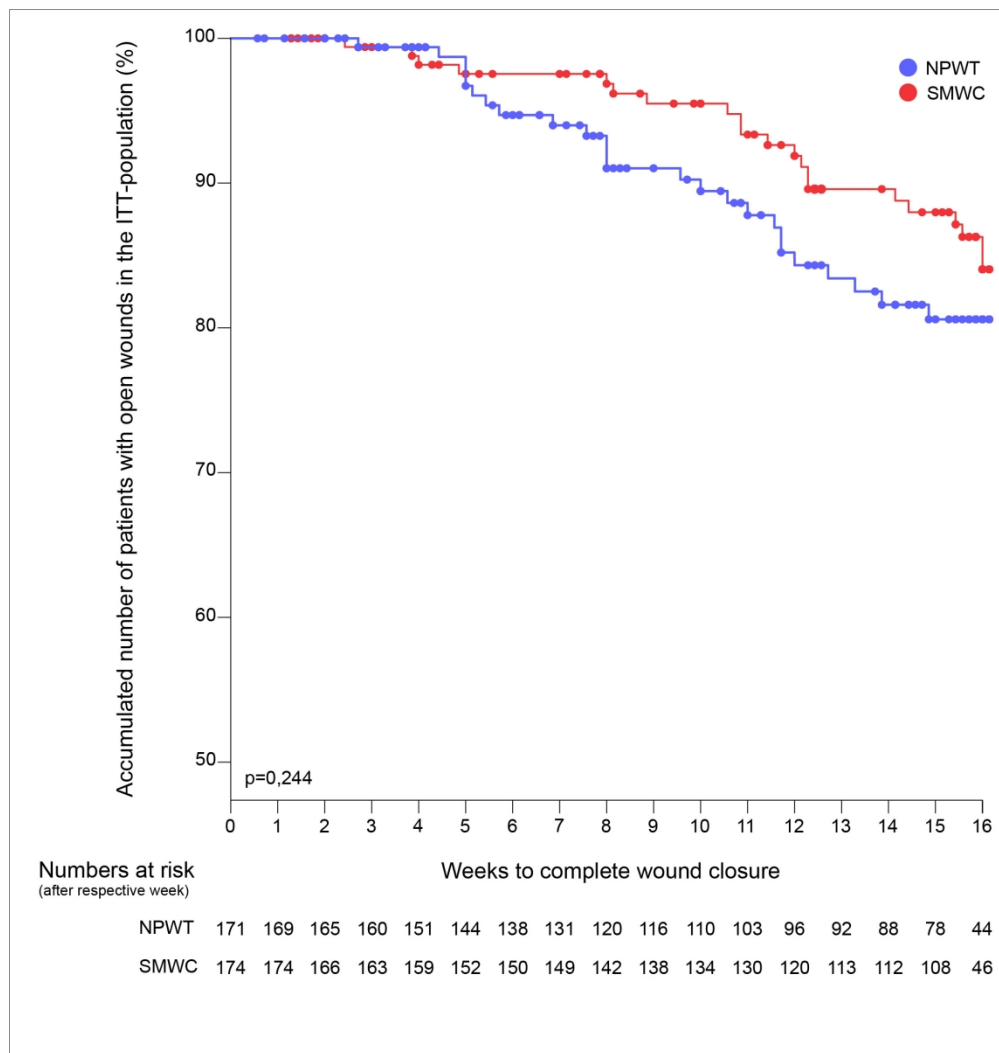

Figure 2: Time to wound closure in the ITT-population

189x198mm (300 x 300 DPI)

1  
2  
3  
4  
5  
6  
7  
8  
9  
10  
11  
12  
13  
14  
15  
16  
17  
18  
19  
20  
21  
22  
23  
24  
25  
26  
27  
28  
29  
30  
31  
32  
33  
34  
35  
36  
37  
38  
39  
40  
41  
42  
43  
44  
45  
46  
47  
48  
49  
50  
51  
52  
53  
54  
55  
56  
57  
58  
59  
60

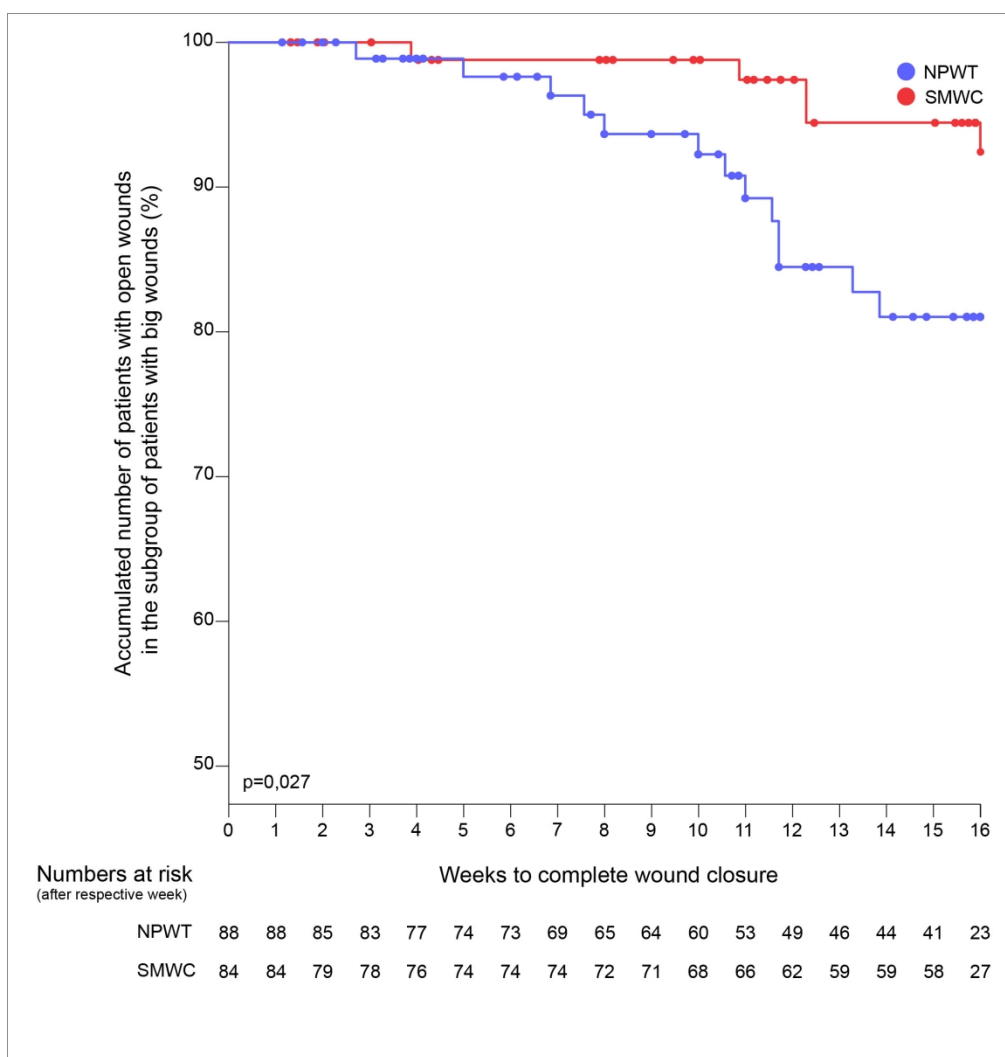

Figure 3: Time to wound closure in the subgroup of big wounds

189x198mm (300 x 300 DPI)

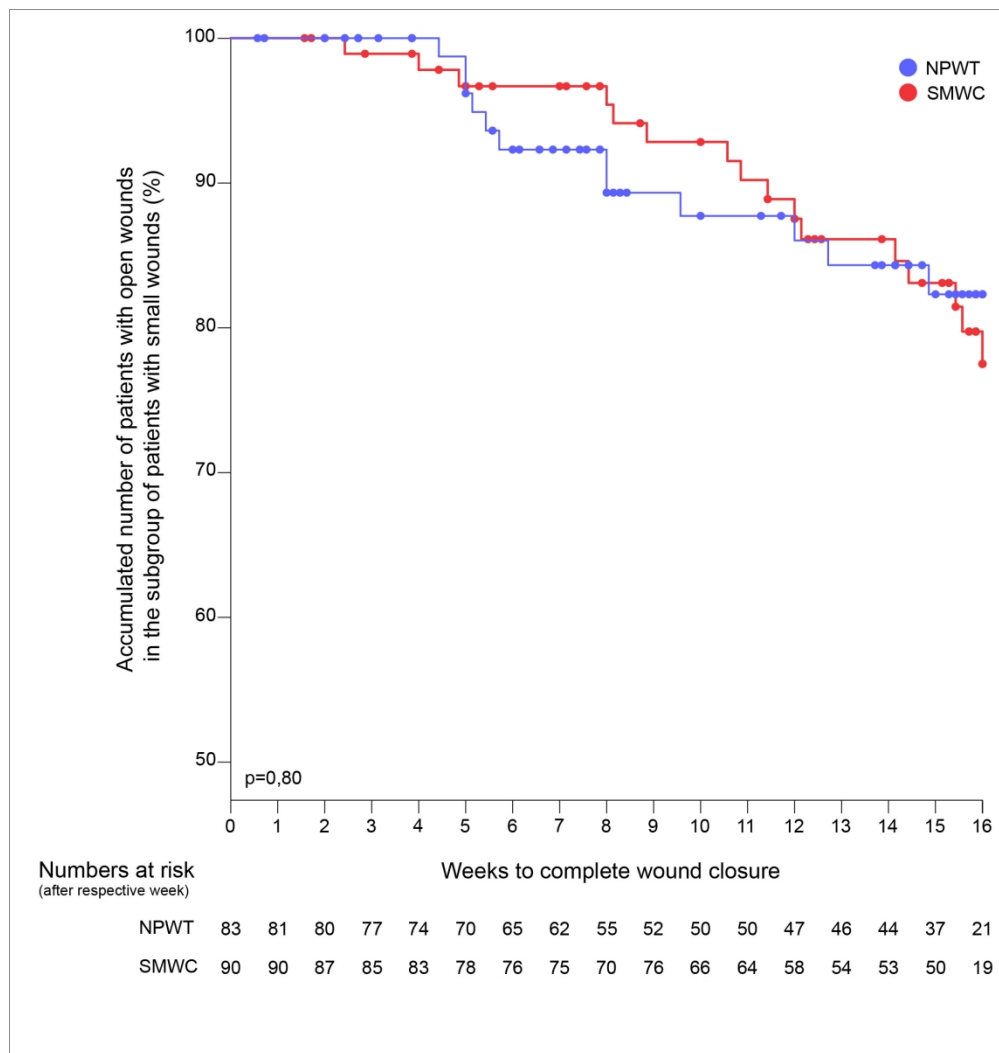

Figure 4: Time to wound closure in the subgroup of small wounds

189x198mm (300 x 300 DPI)

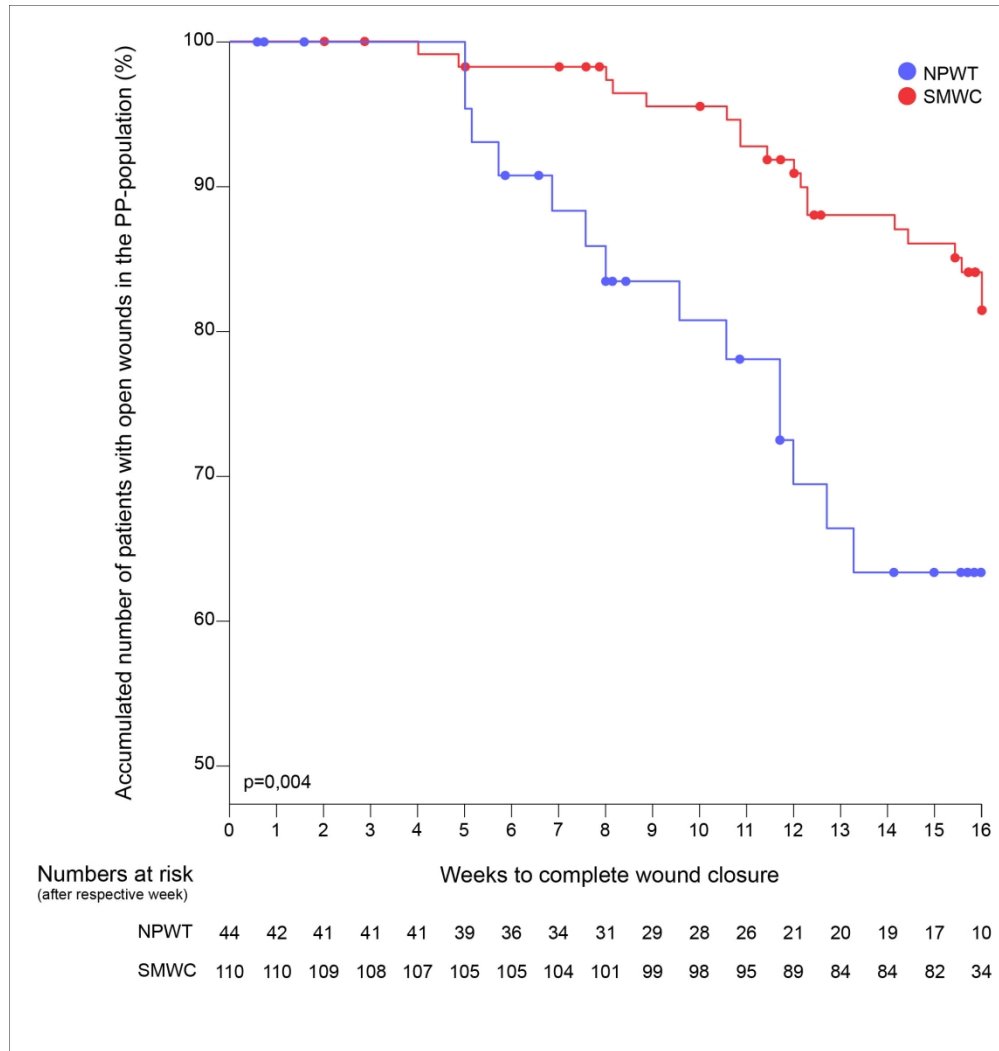

Figure 5: Time to wound closure in the PP-population

189x198mm (300 x 300 DPI)



## Supplementary Appendix

### Table of contents:

- List of investigators
- Supplementary discussion
- Supplementary tables

### List of investigators:

At least one patient was included in the following facilities:

|                                      |                                                                                                                   |
|--------------------------------------|-------------------------------------------------------------------------------------------------------------------|
| 1. PD Dr. med. Achim Neufang         | HSK - Dr. Horst Schmidt Kliniken GmbH<br>Klinik für Gefäßchirurgie<br>Ludwig-Erhard-Straße 100<br>65199 Wiesbaden |
| 2. Dr. med. Holger Lawall            | Asklepios Westklinikum Hamburg<br>Zentrum für Gefäßmedizin<br>Suurheid 20<br>22559 Hamburg                        |
| 3. Prof. Dr. med. Gernold<br>Wozniak | Knappschafts Krankenhaus Bottrop<br>Gefäßchirurgische Klinik<br>Osterfelderstraße 157<br>46242 Bottrop            |
| 4. Prof. Dr. med. Martin Storck      | Städtisches Klinikum Karlsruhe<br>Klinik für Gefäß- und Thoraxchirurgie<br>Moltkestraße 90<br>76133 Karlsruhe     |
| 5. Dr. med. Dirk Hochlenert          | Gemeinschaftspraxis Schlotmann-Hochlenert-Zavaleta-Haberstock<br>Merheimer Straße 217<br>50733 Köln               |
| 6. Dr. med. Gudrun Hetzel            | Klinikum Döbeln<br>Abt. für Gefäßchirurgie<br>Sörmitzer Straße 10<br>04720 Döbeln                                 |
| 7. Dr. med. Karsten Jungheim         | Klinikum Bielefeld Mitte<br>Klinik für Allgemeine Innere Medizin<br>Teutoburger Straße 50<br>33604 Bielefeld      |
| 8. Dr. med. Michael Petzold          | Klinikum Frankfurt/Oder<br>Klinik für Gefäßchirurgie<br>Müllroser Chaussee 7<br>15236 Frankfurt/Oder              |

|                                         |                                                                                                                                                                       |
|-----------------------------------------|-----------------------------------------------------------------------------------------------------------------------------------------------------------------------|
| 9. PD Dr. med. Matthias Weck            | Weißeritztal-Kliniken GmbH<br>Medizinische Klinik III<br>Bürgerstraße 7<br>1705 tal                                                                                   |
| 10. Dr. med. Alexandra Zidek            | Krankenhaus Porz am Rhein<br>Klinik für Gefäßchirurgie<br>Urbacher Weg 19<br>51149 Köln                                                                               |
| 11. Dr. med. Peter Mauckner             | St. Remigius Krankenhaus Opladen<br>Innere Medizin<br>An St. Remigius 26<br>51379 Leverkusen                                                                          |
| 12. Dr. med. Klemens M. Sondern         | Marien Hospital Dortmund-Hombruch<br>Klinik für Innere Medizin/Diabetologie<br>Gablonzstraße 9<br>44225 Dortmund                                                      |
| 13. Prof. Dr. med. Thomas Schmitz-Rixen | Universitätsklinikum Frankfurt<br>Zentrum für Chirurgie<br>Klinik für Gefäß- und Endovascularchirurgie<br>Theodor-Stern-Kai 7, Haus 23C/EG<br>60590 Frankfurt am Main |
| 14. Dr. med. Walter Wetzels-Roth        | Facharztpraxis für Chirurgie<br>Hindenburgstraße 1<br>86807 Buchloe                                                                                                   |
| 15. Dr. med. Matthias Hahn              | Helfenstein Klinik Geislingen<br>Allgemein- und Viszeralchirurgie<br>Eybstraße 16<br>73312 Geislingen/Steige                                                          |
| 16. Dr. med. Karsten Glockemann         | Paracelsus-Klinik am Silbersee<br>Wundzentrum Hannover<br>Oertzeweg 24<br>30851 Langenhagen                                                                           |
| 17. PD Dr. med. Farzin Adili            | Klinikum Darmstadt<br>Chirurgische Klinik III<br>Grafenstraße 9<br>64283 Darmstadt                                                                                    |
| 18. Dr. med. Andreas Riemer             | Ortenau Klinikum Offenburg-Ebertplatz<br>Klinik für Allgemein-, Viszeral- und Gefäßchirurgie<br>Ebertplatz 12<br>77654 Offenburg                                      |

|                                             |                                                                                                                                                |
|---------------------------------------------|------------------------------------------------------------------------------------------------------------------------------------------------|
| 19. Dr. med. Thomas Krönert                 | Thüringen-Kliniken "Georgius Agricola" GmbH<br>Klinik für Gefäßchirurgie<br>Rainweg 68<br>7318 feld                                            |
| 20. Dr. med. Matthias Holfeld               | Klinikum Dorothea Christiane Erxleben GmbH<br>Klinik für Allgemein-, Viszeral- und Gefäßchirurgie<br>Ditfurter Weg 24<br>6484 linburg          |
| 21. Prof. Dr. med. Jan Andre´ Schmidt-Lucke | Franziskus-Krankenhaus Berlin<br>Abt. für Innere Medizin<br>Budapester Straße 15-19<br>10787 Berlin                                            |
| 22. Dr. med. Wolf-Rüdiger Klare             | Hegau-Bodensee Klinikum Radolfzell (HBK)<br>Klinik für Innere Medizin<br>Hausherrenstraße 12<br>78315 Radolfzell                               |
| 23. Dr. med. Hansjörg Mühlen                | Diabetologische Schwerpunktpraxis Dr. med. Hansjörg Mühlen & Partner<br>Ruhrorter Straße 195<br>47119 Duisburg                                 |
| 24. Dr. med. Christian Reinhold             | Kliniken Maria Hilf Mönchengladbach<br>Klinik für Gefäßchirurgie und Angiologie<br>Sandradstraße 43<br>41061 Mönchengladbach                   |
| 25. Dr. med. Makarios Paschalidis           | Städtisches Klinikum München/Bogenhausen<br>Klinik für Endokrinologie, Diabetologie und Angiologie<br>Engschalkingerstraße 77<br>81925 München |
| 26. Gerhard Rothenaicher                    | Facharztpraxis für Chirurgie<br>Cosimastraße 2<br>81927 München                                                                                |
| 27. Dr. med. Elke Anne Klug                 | Bürgerhospital Frankfurt am Main<br>Interdisziplinäres Zentrum Diabetischer Fuß (DDG)<br>Nibelungenallee 37- 41<br>60318 Frankfurt am Main     |
| 28. Dr. med. Siamak Pourhassan              | Gemeinschaftspraxis für Chirurgie und Gefäßmedizin<br>Drs. Alter / Pourhassan / Heim<br>Klosterstraße 12<br>46145 Oberhausen                   |
| 29. Dr. med. Jan Theil                      | Evangelisches Krankenhaus Königin Elisabeth Herzberge gGmbH<br>Abt. für Kardiologie, Angiologie und Diabetologie                               |

|                                 |                                                                                                                                                                                     |
|---------------------------------|-------------------------------------------------------------------------------------------------------------------------------------------------------------------------------------|
|                                 | Herzbergstraße 79<br>10365 Berlin                                                                                                                                                   |
| 30. Dr. med. Martin Adolph      | Städtisches Klinikum Neunkirchen gGmbH<br>Abt. für Gefäßchirurgie & Phlebologie<br>Brunnenstraße 20<br>66538 Neunkirchen                                                            |
| 31. Dr. med. Frank von Feldmann | Westküstenklinikum Heide Klinik für Viszeral- und Gefäßchirurgie<br>Esmarchstraße 50<br>25746 Heide/Holstein                                                                        |
| 32. Dr. med. Gerald Engels      | Chir. Praxisgemeinschaft am Bayenthalgürtel<br>Praxis Dr. med. Gerald Engels<br>Bayenthalgürtel 45<br>50968 Köln                                                                    |
| 33. Dr. med. Joachim Oldenburg  | Malteser Krankenhaus – St. Franziskus-Hospital<br>Medizinische Klinik I<br>Abt. für Diabetologie<br>Waldstraße 17<br>24939 Flensburg                                                |
| 34. Dr. med. Philipp Knepe      | St. Marienkrankenhaus Siegen gGmbH<br>Klinik für Gastroenterologie<br>Kampenstraße 51<br>57072 Siegen                                                                               |
| 35. Dr. med. Steffen Hering     | Krankenhaus Bietigheim<br>Klinik für Innere Medizin, Kardiologie, Endokrinologie,<br>Diabetologie und Internistische Intensivmedizin<br>Riedstraße 12<br>74321 Bietigheim-Bissingen |
| 36. Dr. med. Harald Daum        | Asklepios Kliniken Harburg<br>Eißendorfer Pferdeweg 52<br>21075 Hamburg                                                                                                             |
| 37. Dr. med. Lutz Stemler       | Diabetologikum Ludwigshafen<br>Diabetes-Schwerpunktpraxis<br>Ludwigsplatz 9<br>67059 Ludwigshafen                                                                                   |
| 38. Dr. med. Thomas Müller      | Mariannen-Hospital Werl<br>Abt. für Chirurgie<br>Unnaer Straße 15<br>59457 Werl                                                                                                     |
| 39. Dr. med. Karl Zink          | Diabetes Klinik GmbH & Co KG<br>Theodor-Klotzbücher-Straße 12<br>97980 Bad Mergentheim                                                                                              |

|                           |                                                                                     |
|---------------------------|-------------------------------------------------------------------------------------|
| 40. Dr. med. Dirk Lammers | Institut für Diabetesforschung Münster GmbH<br>Hohenzollernring 70<br>48145 Münster |
|---------------------------|-------------------------------------------------------------------------------------|

### Supplementary Discussion

As direct blinding of patients and investigators was not possible due to the nature of the applied treatment methods, issues of blinding have been addressed using independent blinded outcome assessors and the W.H.A.T. for evaluating the wound photographs. For wound size and wound tissue the values documented by the investigators reflect the expected course much better than the W.H.A.T. results. During study planning the W.H.A.T. (<http://www.what-world.com/>) was the only available validated instrument that was able to measure both wound size and wound tissue composition (granulation, fibrin, and necrosis). For the wound surface area, the difference between the clinical measurements and the W.H.A.T. results may have been caused by the different evaluation methods. An elliptical wound surface area was calculated by the investigators using length and width, but most wounds are not elliptical. The independent blinded assessors marked the wound margin on the photograph and the W.H.A.T. calculates the wound surface area automatically afterwards, thus if the wound photo is of good quality the W.H.A.T. is more precise. In addition, the depth of the wound cannot be assessed using a wound photo, thus wound volume has only been evaluated using the clinical measurements provided by the investigators. The values for granulation tissue and fibrin differ significantly between the clinical estimations and the W.H.A.T. results. This may be caused by the quality of the wound photography, the reliability and precision of both the clinical investigator and the W.H.A.T. system and the wound itself. Wounds with invisible, deeper areas cannot be detected without manipulation. Both circumstances possibly affect the results.

### Supplementary tables

| <b>Demographic and baseline parameters (PP-Population)</b> | <b>Total<br/>N=154 (100%)</b> | <b>NPWT<br/>N=44<br/>(28.6%)</b> | <b>SMWC<br/>N=110<br/>(71.4%)</b> |
|------------------------------------------------------------|-------------------------------|----------------------------------|-----------------------------------|
| Sex                                                        | N=154                         | N=44                             | N=110                             |
| Male                                                       | 113 (73.4%)                   | 29 (65.9%)                       | 84 (76.4%)                        |
| Female                                                     | 41 (26.6%)                    | 15 (34.1%)                       | 26 (23.6%)                        |
| Age in years                                               | N=154                         | N=44                             | N=110                             |
| Mean (SD)                                                  | 67.4 (10.6)                   | 66.5 (11.0)                      | 67.8 (10.4)                       |
| Height in cm                                               | N=153                         | N=43                             | N=110                             |
| Mean (SD)                                                  | 173.8 (12.9)                  | 173.5 (17.4)                     | 174.0 (10.7)                      |
| Weight in kg                                               | N=150                         | N=42                             | N=108                             |
| Mean (SD)                                                  | 95.4 (23.3)                   | 96.2 (21.6)                      | 95.1 (24.0)                       |
| Alcohol                                                    | N=153                         | N=44                             | N=109                             |
| Occasionally                                               | 71 (46.4%)                    | 22 (50.0%)                       | 49 (45.0%)                        |

|                                                                      |               |              |              |
|----------------------------------------------------------------------|---------------|--------------|--------------|
| Chronic                                                              | 3 (2.0%)      | 1 (2.3%)     | 2 (1.8%)     |
| No                                                                   | 79 (51.6%)    | 21 (47.7%)   | 58 (53.2%)   |
| Smoking                                                              | N=154         | N=44         | N=110        |
| No                                                                   | 16 (10.4%)    | 2 (4.5%)     | 14 (12.7%)   |
| Yes                                                                  | 138 (89.6%)   | 42 (95.5%)   | 96 (87.3%)   |
| Number of years (Mean (SD))                                          | 37.0 (9.2)    | 42.0 (2.8)   | 36.3 (9.7)   |
| Packs / day (Mean)                                                   | 1.0           | 1.0          | 1.0          |
| Drugs                                                                | N=153         | N=44         | N=109        |
| Occasionally                                                         | 0 (0%)        | 0 (0%)       | 0 (0%)       |
| Chronic                                                              | 1 (0.7%)      | 0 (0%)       | 1 (0.9%)     |
| No                                                                   | 152 (99.3%)   | 44 (100%)    | 108 (99.1%)  |
| Requiring dialysis                                                   | N=154         | N=44         | N=110        |
| Yes                                                                  | 11 (7.1 %)    | 2 (4.5%)     | 9 (8.2%)     |
| No                                                                   | 143 (92.9%)   | 42 (95.5%)   | 101 (91.8%)  |
| Allergies                                                            | N=154         | N=44         | N=110        |
| Yes                                                                  | 16 (10.4%)    | 6 (13.6%)    | 10 (9.1%)    |
| No                                                                   | 138 (89.6%)   | 38 (86.4%)   | 100 (90.9%)  |
| Subjective assessment of nutritional condition                       | N=150         | N=43         | N=107        |
| Well-nourished                                                       | 147 (98.0%)   | 42 (97.7%)   | 105 (98.1%)  |
| Moderately malnourished or suspected malnutrition                    | 3 (2.0%)      | 1 (2.3%)     | 2 (1.9%)     |
| Malnourished                                                         | 0 (0%)        | 0 (0%)       | 0 (0%)       |
| Peripheral arterial occlusive disease (PAOD)                         | N=109 (70.8%) | N=29 (65.9%) | N=80 (72.7%) |
| without critical limb ischemia                                       | 103 (94.5%)   | 28 (96.6%)   | 75 (93.8%)   |
| with critical limb ischemia                                          | 6 (5.5%)      | 1 (3.4%)     | 5 (6.3%)     |
| Rutherford classification for chronic limb ischemia (Grade/Category) | N=109         | N=29         | N=80         |
| 0/0 Asymptomatic—no hemodynamically significant occlusive disease    | 13 (11.9%)    | 4 (13.8%)    | 9 (11.3%)    |
| I/1 Mild claudication                                                | 13 (11.9%)    | 2 (6.9%)     | 11 (13.8%)   |
| I/2 Moderate claudication                                            | 8 (7.3%)      | 0 (0.0%)     | 8 (10.0%)    |
| I/3 Severe claudication                                              | 4 (3.7%)      | 1 (3.4%)     | 3 (3.8%)     |
| II/4 Ischemic rest pain                                              | 1 (0.9%)      | 1 (3.4%)     | 0 (0%)       |
| III/5 Minor tissue loss—non healing ulcer, focal gangrene with       | 67 (61.5%)    | 21 (72.4%)   | 46 (57.5%)   |

|                                                                                                      |               |               |               |
|------------------------------------------------------------------------------------------------------|---------------|---------------|---------------|
| diffuse pedal ischemia                                                                               |               |               |               |
| III/6 Major tissue loss—extending above transmetatarsal level, functional foot no longer salvageable | 3 (2.8%)      | 0 (0.0%)      | 3 (3.8%)      |
| Revascularisation before study start                                                                 | N=9 (5.8%)    | N=1 (2.3%)    | N=8 (7.3%)    |
| Percutaneous transluminal angioplasty (PTA)                                                          | 5 (55.6%)     | 0 (0.0%)      | 5 (62.5%)     |
| PTA + Stent                                                                                          | 0 (0%)        | 0 (0%)        | 0 (0%)        |
| Veins-Bypass                                                                                         | 1 (11.1%)     | 1 (100.0%)    | 0 (11.1%)     |
| Polytetrafluoroethylene (PTFE) Bypass                                                                | 1 (11.1%)     | 0 (0%)        | 1 (12.5%)     |
| Thromboendarterectomy and patch plastic                                                              | 2 (22.2%)     | 0 (0%)        | 2 (25.0%)     |
| Revascularization with influence on the wound                                                        | 9 of 9 (100%) | 1 of 1 (100%) | 0 of 8 (100%) |
| Sufficient revascularization result                                                                  | 9 of 9 (100%) | 1 of 1 (100%) | 8 of 8 (100%) |
| Insufficient revascularization result                                                                | 0 of 9 (0%)   | 0 of 1 (0%)   | 0 of 8 (0%)   |
| Revascularization result not assessable                                                              | 0 of 9 (0%)   | 0 of 1 (0%)   | 0 of 8 (0%)   |

Table S1: Patient demographics and baseline characteristics of the Per-Protocol (PP) population. Data are N (%) and Mean (SD). “N=” is stating the number of patients with actual available information. Findings, diagnoses and procedures documented by the investigators are presented.

| Observation time point | Wound surface NPWT                                         |                                      | Wound surface SMWC                                         |                                       |
|------------------------|------------------------------------------------------------|--------------------------------------|------------------------------------------------------------|---------------------------------------|
|                        | Calculated from width and length (according to eCRF entry) | Results of the photo analysis        | Calculated from width and length (according to eCRF entry) | Results of the photo analysis         |
| Randomization          | 1060 (1536)<br>550 (1236)<br>N=171 (2)                     | 687 (879)<br>321 (760)<br>N=118 (10) | 1141 (3247)<br>471 (1007)<br>N=174 (0)                     | 664 (1050)<br>316 (658)<br>N=129 (13) |
| Week 1                 | 847 (1489)<br>397 (801)<br>N=171 (15)                      | 643 (820)<br>329 (750)<br>N=118 (32) | 1085 (3234)<br>395 (867)<br>N=174 (25)                     | 713 (1065)<br>307 (749)<br>N=129 (36) |
| Week 3                 | 810 (1472)<br>314 (860)<br>N=171 (24)                      | 590 (742)<br>273 (633)<br>N=118 (28) | 1025 (3242)<br>390 (913)<br>N=174 (22)                     | 701 (1212)<br>266 (768)<br>N=129 (35) |
| Week 5                 | 717 (1379)<br>275 (769)<br>N=171 (37)                      | 607 (828)<br>231 (843)<br>N=118 (42) | 759 (1466)<br>267 (824)<br>N=174 (41)                      | 610 (1119)<br>219 (635)<br>N=129 (38) |
| Week 8                 | 636 (1322)<br>220 (712)                                    | 495 (770)<br>182 (561)               | 674 (1410)<br>186 (783)                                    | 501 (937)<br>165 (481)                |

|         |             |            |             |             |
|---------|-------------|------------|-------------|-------------|
|         | N=171 (52)  | N=118 (48) | N=174 (42)  | N=129 (42)  |
| Week 12 | 549 (858)   | 457 (742)  | 570 (940)   | 493 (950)   |
|         | 165 (964)   | 134 (494)  | 169 (632)   | 133 (498)   |
|         | N=171 (110) | N=118 (88) | N=174 (124) | N=129 (104) |
| Week 16 | 440 (810)   | 334 (649)  | 493 (1095)  | 351 (750)   |
|         | 79 (471)    | 114 (363)  | 69 (415)    | 77 (320)    |
|         | N=171 (80)  | N=118 (66) | N=174 (63)  | N=129 (56)  |

Table S2: Wound surface area at each observation time point in the ITT-population. Wound surface area at each observation time point until end of maximum study treatment time of 16 weeks is separately shown for the calculated data from width and length as documented in the eCRF and for the data derived from the photo analysis. An elliptical wound surface area has been calculated from the documented width and length (eCRF)  $[(\pi / 4) \times \text{length} \times \text{width} = \text{area}]$ . Data show mean (SD) and median (IQR) as well the number (N) of values analyzed for the ITT population (number (N) of values substituted by the last observation carried forward (LOCF) method).

| Observation time point | Wound volume NPWT (mm <sup>3</sup> ) | Wound volume SMWC (mm <sup>3</sup> ) |
|------------------------|--------------------------------------|--------------------------------------|
| Randomization          | 22498 (58930)                        | 21740 (74181)                        |
|                        | 4710 (15048)                         | 4759 (12888)                         |
|                        | N=171 (2)                            | N=174 (0)                            |
| Week 1                 | 13203 (28709)                        | 19979 (73143)                        |
|                        | 2487 (6908)                          | 3533 (11407)                         |
|                        | N=171 (15)                           | N=174 (26)                           |
| Week 3                 | 10708 (28521)                        | 16217 (67494)                        |
|                        | 1884 (6857)                          | 2293 (8831)                          |
|                        | N=171 (24)                           | N=174 (23)                           |
| Week 5                 | 7700 (19719)                         | 11286 (32566)                        |
|                        | 1166 (5338)                          | 1365 (7539)                          |
|                        | N=171 (37)                           | N=174 (42)                           |
| Week 8                 | 5592 (11535)                         | 8772 (27674)                         |
|                        | 785 (4604)                           | 812 (5258)                           |
|                        | N=171 (78)                           | N=174 (67)                           |
| Week 12                | 5333 (12422)                         | 6639 (16454)                         |
|                        | 565 (3913)                           | 625 (4083)                           |
|                        | N=171 (119)                          | N=174 (133)                          |
| Week 16                | 3880 (10534)                         | 5465 (14874)                         |
|                        | 141 (1890)                           | 200 (1587)                           |
|                        | N=171 (83)                           | N=174 (64)                           |



1  
2  
3 Table S3: Wound volume at each observation time point during the study treatment time of maximum 16 weeks in the ITT-  
4 population. Wound volume (length x width x depth) was calculated from width, length and depth as documented in the  
5 eCRF. Data show mean (SD) and median (IQR) as well the number (N) of values analyzed for the ITT population (number  
6 (N) of values substituted by the last observation carried forward (LOCF) method).  
7  
8  
9  
10  
11  
12  
13  
14  
15  
16  
17  
18  
19  
20  
21  
22  
23  
24  
25  
26  
27  
28  
29  
30  
31  
32  
33  
34  
35  
36  
37  
38  
39  
40  
41  
42  
43  
44  
45  
46  
47  
48  
49  
50  
51  
52  
53  
54  
55  
56  
57  
58  
59  
60

For peer review only

| Observation<br>time point | NPWT Granulation |          | NPWT Fibrin |          | NPWT Necrosis |          | SMWC Granulation |           | SMWC Fibrin |          | SMWC Necrosis |          |
|---------------------------|------------------|----------|-------------|----------|---------------|----------|------------------|-----------|-------------|----------|---------------|----------|
|                           | eCRF             | W.H.A.T. | eCRF        | W.H.A.T. | eCRF          | W.H.A.T. | eCRF             | W.H.A.T.  | eCRF        | W.H.A.T. | eCRF          | W.H.A.T. |
| Rando                     | 34 (36)          | 22 (25)  | 21 (28)     | 71 (27)  | 3 (10)        | 7 (15)   | 34 (37)          | 24 (26)   | 22 (29)     | 69 (28)  | 2 (9)         | 7 (14)   |
|                           | 20 (70)          | 12 (37)  | 10 (30)     | 79 (46)  | 0 (0)         | 0 (5)    | 20 (71)          | 14 (39)   | 10 (40)     | 79 (44)  | 0 (0)         | 0 (8)    |
|                           | 171 (2)          | 118 (8)  | 170 (4)     | 118 (8)  | 169 (5)       | 118 (8)  | 174 (3)          | 129 (12)  | 174 (1)     | 129 (12) | 172 (2)       | 129 (12) |
| Week 1                    | 58 (35)          | 21 (25)  | 19 (22)     | 73 (27)  | 5 (13)        | 6 (12)   | 49 (35)          | 21 (25)   | 24 (27)     | 74 (26)  | 6 (15)        | 5 (9)    |
|                           | 70 (70)          | 10 (36)  | 10 (30)     | 81 (47)  | 0 (2)         | 0 (5)    | 50 (70)          | 10 (36)   | 15 (31)     | 85 (40)  | 0 (5)         | 0 (5)    |
|                           | 171 (16)         | 118 (32) | 71 (19)     | 118 (32) | 169 (23)      | 118 (32) | 174 (28)         | 129 (36)  | 174 (27)    | 129 (36) | 172 (30)      | 129 (36) |
| Week 3                    | 67 (31)          | 16 (23)  | 18 (22)     | 80 (25)  | 5 (13)        | 4 (11)   | 57 (32)          | 21 (25)   | 25 (26)     | 77 (25)  | 5 (13)        | 3 (7)    |
|                           | 80 (55)          | 5 (25)   | 10 (30)     | 91 (30)  | 0 (0)         | 0 (1)    | 60 (60)          | 10 (36)   | 20 (35)     | 85 (36)  | 0 (3)         | 0 (1)    |
|                           | 171 (26)         | 118 (27) | 171 (30)    | 118 (27) | 169 (28)      | 118 (27) | 174 (24)         | 129 (35)  | 174 (25)    | 129 (35) | 172 (30)      | 129 (35) |
| Week 5                    | 70 (30)          | 15 (22)  | 18 (24)     | 83 (22)  | 4 (13)        | 2 (8)    | 62 (31)          | 18 (26)   | 23 (25)     | 80 (26)  | 4 (12)        | 3 (10)   |
|                           | 80 (45)          | 6 (21)   | 10 (25)     | 91 (26)  | 0 (0)         | 0 (1)    | 63 (50)          | 4 (32)    | 10 (39)     | 93 834   | 0 (0)         | 0 (0)    |
|                           | 171 (36)         | 118 (43) | 171 (38)    | 118 (43) | 169 (42)      | 118 (43) | 174 (44)         | 129 (36)  | 174 (47)    | 129 (36) | 172 (46)      | 129 (36) |
| Week 8                    | 74 (30)          | 16 (23)  | 17 (24)     | 82 (24)  | 4 (13)        | 2 (6)    | 70 (29)          | 17 (24)   | 17 (21)     | 80 (25)  | 5 (13)        | 3 (11)   |
|                           | 90 (40)          | 4 (27)   | 10 (20)     | 93 (33)  | 0 (0)         | 0 (0)    | 80 (40)          | 3 (33)    | 10 (20)     | 92 (36)  | 0 (0)         | 0 (0)    |
|                           | 171 (53)         | 118 (48) | 171 (56)    | 118 (48) | 171 (59)      | 118 (48) | 174 (44)         | 129 (43)  | 174 (49)    | 129 (43) | 174 (52)      | 129 (43) |
| Week 12                   | 75 (30)          | 15 (23)  | 17 (25)     | 83 (24)  | 4 (13)        | 1 (5)    | 73 (29)          | 16 (23)   | 16 (20)     | 82 (23)  | 5 (13)        | 2 (6)    |
|                           | 90 (40)          | 4 (22)   | 5 (20)      | 96 (23)  | 0 (0)         | 0 (0)    | 80 (38)          | 3 (29)    | 10 (20)     | 93 (32)  | 0 (0)         | 0 (0)    |
|                           | 171(115)         | 118 (89) | 171(118)    | 118 (89) | 171(119)      | 118 (89) | 174(124)         | 129(102)  | 174(125)    | 129(102) | 172(126)      | 129(102) |
| Week 16                   | 77 (30)          | 13 (22)  | 14 (22)     | 86 (24)  | 3 (10)        | 1 (6)    | 76 (30)          | 17 (24)   | 15 (24)     | 81 (24)  | 3 (13)        | 2 (6)    |
|                           | 90 (40)          | 1 (17)   | 2 (20)      | 98 (19)  | 0 (0)         | 0 (0)    | 90 (40)          | 4 (31)    | 5 (20)      | 93 (35)  | 0 (0)         | 0 (0)    |
|                           | 171 (78)         | 118 (66) | 171 (79)    | 118 (66) | 171 (82)      | 118 (66) | 174 (62)         | 129 (576) | 174 (65)    | 129 (56) | 174 (66)      | 129 (56) |

1  
2 Table S1: Wound tissue composition at each observation time point during the study treatment time of maximum 16 week in the ITT-population. Wound tissue (granulation, fibrin, and necrosis) is  
3 separately shown for the data documented in the eCRF and for the data derived from the photo analysis using the Wound Healing Analyzing Tool (W.H.A.T.). Data show mean (SD) and median  
4 (IQR) as well the number (N) of values analyzed for the ITT population (number (N) of values substituted by the last observation carried forward (LOCF) method).  
5  
6  
7  
8  
9  
10  
11  
12  
13  
14  
15  
16  
17  
18  
19  
20  
21  
22  
23  
24  
25  
26  
27  
28  
29  
30  
31  
32  
33  
34  
35  
36  
37  
38  
39  
40  
41  
42  
43  
44  
45  
46

For peer review only

| <b>Observation time point</b> | <b>Pain Total<br/>N=344</b>       | <b>Pain NPWT<br/>N=171</b>       | <b>Pain SMWC<br/>N=173</b>       |
|-------------------------------|-----------------------------------|----------------------------------|----------------------------------|
| Screening                     | 2.1 (2.4)<br>1 (4)<br>N=344 (0)   | 2.1 (2.3)<br>1 (4)<br>N=171 (0)  | 2.1 (2.4)<br>1 (4)<br>N=173 (0)  |
| Week 1                        | 1.7 (2.2)<br>1 (3)<br>N=344 (6)   | 1.6 (2.2)<br>0 (2)<br>N=171 (1)  | 1.8 (2.2)<br>1 (3)<br>N=173 (5)  |
| Week 3                        | 1.5 (2.0)<br>1 (2)<br>N=344 (27)  | 1.3 (1.9)<br>0 (2)<br>N=171 (11) | 1.7 (2.1)<br>1 (3)<br>N=173 (16) |
| Week 5                        | 1.3 (1.9)<br>0 (2)<br>N=344 (45)  | 1.2 (1.9)<br>0 (2)<br>N=171 (21) | 1.4 (2.0)<br>0 (2)<br>N=173 (24) |
| Week 8                        | 1.3 (1.9)<br>0 (2)<br>N=344 (70)  | 1.2 (1.9)<br>0 (2)<br>N=171 (38) | 1.3 (1.9)<br>0 (2)<br>N=173 (32) |
| Week 12                       | 1.1 (1.8)<br>0 (2)<br>N=344 (115) | 1.2 (1.9)<br>0 (2)<br>N=171 (64) | 1.1 (1.8)<br>0 (2)<br>N=173 (51) |
| Week 16                       | 1.0 (1.7)<br>0 (1)<br>N=344 (129) | 1.0 (1.7)<br>0 (2)<br>N=171 (76) | 0.9 (1.7)<br>0 (1)<br>N=173 (53) |

Table S2: Pain in the course of the study treatment time of maximum 16 weeks in the ITT-population. Pain evaluation at the pre-defined observation time points during the active study treatment time of 16 weeks in the ITT population. Data show mean (SD) and median (IQR) as well the number (N) of values analyzed for the ITT population (number (N) of values substituted by the last observation carried forward (LOCF) method).

| <b>Observation time point</b> | <b>EQ5D NPWT</b>                       | <b>EQ5D SMWC</b>                        |
|-------------------------------|----------------------------------------|-----------------------------------------|
| Screening                     | 0,53 (0,27)<br>0,53 (0,2)<br>N=156 (2) | 0,53 (0,24)<br>0,53 (0,18)<br>N=159 (3) |
| End of therapy                | 0,67 (0,24)<br>0,77 (0,29)<br>N=62 (2) | 0,72 (0,17)<br>0,66 (0,35)<br>N=13 (0)  |

|                                     |             |             |
|-------------------------------------|-------------|-------------|
| End of maximum study treatment time | 0,66 (0,22) | 0,61 (0,25) |
|                                     | 0,66 (0,28) | 0,63 (0,24) |
|                                     | N=63 (2)    | N=95 (2)    |
| Follow up after 6 months            | 0,69 (0,26) | 0,67 (0,23) |
|                                     | 0,77 (0,35) | 0,63 (0,39) |
|                                     | N=93 (3)    | N=97 (2)    |

Table S3: Quality of life (EQ5D) in the course of the study treatment time of 16 week in the ITT-population. Quality of life evaluated with the EQ5D instrument at the pre-defined observation time points during the active study treatment time of 16 weeks in the ITT-population. Data show mean (SD) and median (IQR) as well the number (N) of values analyzed for the ITT population (number (N) of values substituted by the last observation carried forward (LOCF) method).

| Wound surface area<br>mm <sup>2</sup> | Small wounds   |              |              |       | Big wounds     |              |              |       |
|---------------------------------------|----------------|--------------|--------------|-------|----------------|--------------|--------------|-------|
|                                       | Total<br>N=173 | NPWT<br>N=83 | SMWC<br>N=90 | p     | Total<br>N=172 | NPWT<br>N=88 | SMWC<br>N=84 | p     |
| N (LOCF)                              | 2              | 2            | 0            | 0.232 | 0              | 0            | 0            | 0.193 |
| Mean (SD)                             | 213 (136)      | 212 (138)    | 213 (135)    |       | 1995 (3377)    | 1860 (1805)  | 2135 (4474)  |       |
| Median (IQR)                          | 188 (220)      | 176 (220)    | 196 (222)    |       | 1276 (1482)    | 1364 (1242)  | 1242 (1708)  |       |
| Min - Max                             | 12-484         | 20-484       | 12-471       |       | 491-40773      | 520-13188    | 491-40773    |       |

Table S4: Wound surface area for small and big wounds. Data show the number (N) of participants available for the analysis in total and for both treatment arms, the number (N) of values substituted by the last observation carried forward (LOCF) method; mean (SD), median (IQR); and minimum (min) and maximum (max).

| Wound closure rate                           | NPWT (N=171) | SMWC (N=174) | p    |
|----------------------------------------------|--------------|--------------|------|
| <b>Small wounds</b>                          | <b>N=83</b>  | <b>N=90</b>  |      |
| Within 16 weeks maximum study treatment time | 12 (14.5 %)  | 16 (17.8 %)  | 0.6  |
| At follow up after 6 months                  | 13 (15.7 %)  | 24 (26.7 %)  | 0.10 |

Table S5: Wound closure rates within the maximum study treatment time of 16 weeks and within the study observation time of 6 months for small wounds. Data show the number (N) of participants available for the analysis in total and for both treatment arms and the number of patients with wound closure (N) within 16 weeks and after 6 months as well the percentage (%) of patients achieving the endpoints within both treatment arms.

| Wound closure rate                           | NPWT (N=171) | SMWC (N=174) | P    |
|----------------------------------------------|--------------|--------------|------|
| <b>Big wounds</b>                            | <b>N=88</b>  | <b>N=84</b>  |      |
| Within 16 weeks maximum study treatment time | 13 (14.8 %)  | 5 (6.0 %)    | 0.08 |
| At follow up after 6 months                  | 11 (12.5 %)  | 12 (14.3 %)  | 0.82 |

Table S6: Wound closure rates within the maximum study treatment time of 16 weeks and within the study observation time of 6 months for big wounds. Data show the number (N) of participants available for the analysis in total and for both

treatment arms and the number of patients with wound closure (N) within 16 weeks and after 6 months as well the percentage (%) of patients achieving the endpoints within both treatment arms.

| <b>Time until min. 95 % granulation tissue for small wounds</b> | <b>Total (N=100)</b> | <b>NPWT (N=52)</b> | <b>SMWC (N=48)</b> | <b>p</b> |
|-----------------------------------------------------------------|----------------------|--------------------|--------------------|----------|
| Mean (SD)                                                       | 38.6 (37.4)          | 28.5 (30.0)        | 49.5 (41.6)        | 0.005    |
| Median (IQR)                                                    | 26.5 (50.0)          | 20.0 (28.0)        | 48.0 (79.0)        |          |
| Min-Max                                                         | 0-114                | 0-113              | 0-114              |          |

Table S7: Time until optimal preparation of the wound bed (min. 95 % granulation tissue) for the subgroup of small wounds. Data show the number (N) of participants available for the analysis in total and for both treatment arms; mean (SD); median (IQR); and minimum (min) and maximum (max).

| <b>Time until min 95 % granulation tissue for big wounds</b> | <b>Total (N=80)</b> | <b>NPWT (N=47)</b> | <b>SMWC (N=33)</b> | <b>p</b> |
|--------------------------------------------------------------|---------------------|--------------------|--------------------|----------|
| Mean (SD)                                                    | 47.8 (40.8)         | 43.4 (37.9)        | 54.0 (44.6)        | 0.27     |
| Median (IQR)                                                 | 36.5 (70.0)         | 35.0 (61.0)        | 56.0 (105.0)       |          |
| Min-Max                                                      | 0-127               | 0-127              | 0-115              |          |

Table S8: Time until optimal preparation of the wound bed (min 95 % granulation tissue) for the subgroup of big wounds. Data show the number (N) of participants available for the analysis in total and for both treatment arms; mean (SD); median (IQR); and minimum (min) and maximum (max).

| <b>Amputations &amp; Resections</b>                    | <b>Total</b> | <b>NPWT</b> | <b>SMWC</b> | <b>p</b> |
|--------------------------------------------------------|--------------|-------------|-------------|----------|
| <b>Small wounds</b>                                    | <b>N=173</b> | <b>N=83</b> | <b>N=90</b> |          |
| No. of patients with amputations or resections [N (%)] | 35 (20.2%)   | 19 (22.9%)  | 16 (17.8%)  | 0.45 (F) |
| No. of performed amputations and resections [N]        | 50           | 22          | 28          | 0.51 (U) |
| No. of patients with minor amputations [N (%)]         | 35 (20.2%)   | 19 (22.9%)  | 16 (17.8%)  | 0.45 (F) |
| No. of patients with major amputations [N (%)]         | 0 (0%)       | 0 (0%)      | 0 (0%)      | -        |

Table S9: Amputations and resections in the subgroup of small wounds. Data show the number (N) of participants available for the analysis in total and for both treatment arms and the number (N) and the percentage (%) of patients with amputations or resections and minor and major amputations.

| <b>Amputations &amp; Resections</b> | <b>Total</b> | <b>NPWT</b> | <b>SMWC</b> | <b>p</b> |
|-------------------------------------|--------------|-------------|-------------|----------|
| <b>Big wounds</b>                   | <b>N=172</b> | <b>N=88</b> | <b>N=84</b> |          |

|                                                        |            |            |            |          |
|--------------------------------------------------------|------------|------------|------------|----------|
| No. of patients with amputations or resections [N (%)] | 36 (20.9%) | 16 (18.2%) | 20 (23.8%) | 0.45 (F) |
| No. of performed amputations and resections [N]        | 52         | 45         | 57         | 0.41 (U) |
| No. of patients with minor amputations [N (%)]         | 34 (19.8%) | 14 (15.9%) | 20 (23.8%) | 0.25 (F) |
| No. of patients with major amputations [N (%)]         | 2 (1.2%)   | 2 (2.3%)   | 0 (0%)     | 0.50 (F) |

Table S10: Amputations and resections in the subgroup of big wounds. Data show the number (N) of participants available for the analysis in total and for both treatment arms and the number (N) and the percentage (%) of patients with amputations or resections and minor and major amputations.

| Wound closure rate                     | Total<br>N=154 | NPWT<br>N=44 | SMWC<br>N=110 | p     |
|----------------------------------------|----------------|--------------|---------------|-------|
| Wound closures [N (%)] within 16 weeks | 33 (21.4 %)    | 14 (31.8%)   | 19 (17.3%)    | 0.053 |
| Wound closures [N (%)] after 6 months  | 41 (26.6 %)    | 11 (25.0%)   | 30 (27.3%)    | 0.84  |

Table S11: Wound closure rate after 6 months and in the PP-population. Data show the number (N) of participants available for the analysis in total and for both treatment arms and the number (N) and the percentage (%) of patients with wound closures within 16 weeks and after 6 months.

| Time until min. 95 % granulation tissue | Total (N=100) | NPWT (N=38) | SMWC (N=62) | p      |
|-----------------------------------------|---------------|-------------|-------------|--------|
| Mean (SD)                               | 43.8 (42.3)   | 23.8 (31.7) | 56.0 (43.5) | <0.001 |
| Median (IQR)                            | 30.0 (76)     | 8.5 (28.0)  | 56.0 (96.0) |        |
| Min - Max                               | 0 - 127       | 0 - 127     | 0 - 115     |        |

Table S12: Time until optimal preparation of the wound for further treatment (min 95 % granulation tissue) in the PP-population. Data show the number (N) of participants available for the analysis in total and for both treatment arms; mean (SD); median (IQR); and minimum (min) and maximum (max).

| Recurrences                              | Total (N=154) | NPWT (N=44) | SMWC (N=110) | p    |
|------------------------------------------|---------------|-------------|--------------|------|
| No. of patients with recurrences [N (%)] | 8 (5.2 %)     | 3 (8.1 %)   | 5 (5.3%)     | 0.69 |
| No. of recurrences [N]                   | 9             | 4           | 5            | 0.38 |

Table S13: Recurrences in the PP-population. Data show the number (N) of participants available for the analysis in total and for both treatment arms and the number (N) and the percentage (%) of patients with recurrences.

| Amputations & Resections                             | Total (N=154) | NPWT<br>(N=44) | SMWC<br>(N=110) | p    |
|------------------------------------------------------|---------------|----------------|-----------------|------|
| No. of patients with amputation or resection [N (%)] | 30 (19.5%)    | 9 (20.5%)      | 21 (21.4%)      | 0.83 |

|                                                |            |           |            |      |
|------------------------------------------------|------------|-----------|------------|------|
| No. of amputations or resections [N]           | 39         | 11        | 28         | 0.86 |
| No. of patients with Minor-Amputations [N (%)] | 30 (18.9%) | 9 (12.8%) | 21 (21.4%) | 0.83 |
| No. of patients with Major-Amputations [N (%)] | 0 (0%)     | 0 (0%)    | 0 (0%)     | -    |

Table S14: Amputations and resections in the PP-population. Data show the number (N) of participants available for the analysis in total and for both treatment arms and the number (N) and the percentage (%) of patients with amputations or resections and minor and major amputations.

| Observation time point | Wound surface NPWT                                         |                               | Wound surface SMWC     |                                                            |
|------------------------|------------------------------------------------------------|-------------------------------|------------------------|------------------------------------------------------------|
|                        | Calculated from width and length (according to eCRF entry) | Results of the photo analysis | Observation time point | Calculated from width and length (according to eCRF entry) |
| Randomization          | 964 (1392)                                                 | 633 (795)                     | 878 (1266)             | 669 (1143)                                                 |
|                        | 345 (1426)                                                 | 299 (705)                     | 373 (889)              | 294 (692)                                                  |
|                        | N= 44 (1)                                                  | N=41 (3)                      | N= 110 (0)             | N=102 (9)                                                  |
| Week 1                 | 525 (696)                                                  | 524 (614)                     | 827 (1238)             | 706 (1138)                                                 |
|                        | 224 (408)                                                  | 318 (561)                     | 306 (863)              | 289 (775)                                                  |
|                        | N= 44 (5)                                                  | N=41 (8)                      | N= 110 (16)            | N=102 (27)                                                 |
| Week 3                 | 428 (635)                                                  | 477 (737)                     | 803 (1306)             | 714 (1316)                                                 |
|                        | 176 (378)                                                  | 165 (424)                     | 238 (867)              | 259 (656)                                                  |
|                        | N= 44 (6)                                                  | N=41 (9)                      | N= 110 (7)             | N=102 (26)                                                 |
| Week 5                 | 355 (590)                                                  | 418 (602)                     | 650 (1157)             | 607 (1212)                                                 |
|                        | 100 (291)                                                  | 165 (435)                     | 161 (670)              | 167 (545)                                                  |
|                        | N= 44 (8)                                                  | N=41 (15)                     | N= 110 (18)            | N=102 (29)                                                 |
| Week 8                 | 284 (528)                                                  | 320 (530)                     | 569 (1072)             | 479 (990)                                                  |
|                        | 53 (217)                                                   | 83 (264)                      | 106 (443)              | 123 (397)                                                  |
|                        | N= 44 (8)                                                  | N=41 (16)                     | N= 110 (17)            | N=102 (29)                                                 |
| Week 12                | 283 (580)                                                  | 289 (537)                     | 528 (1024)             | 474 (1006)                                                 |
|                        | 14 (130)                                                   | 62 (175)                      | 79 (419)               | 111 (407)                                                  |
|                        | N= 44 (24)                                                 | N=41 (32)                     | N= 110 (71)            | N=102 (80)                                                 |
| Week 16                | 190 (416)                                                  | 179 (333)                     | 386 (1124)             | 319 (724)                                                  |
|                        | 0 (95)                                                     | 30 (204)                      | 31 (159)               | 65 (256)                                                   |
|                        | N= 44 (14)                                                 | N=41 (25)                     | N= 110 (19)            | N=102 (42)                                                 |

Table S18: Wound surface area at each observation time point during the study treatment time of maximum 16 weeks separately shown for the calculated data from width and length as documented in the eCRF and for the data derived from the photo analysis using W.H.A.T. Data show mean (SD) and median (IQR) as well the number (N) of values analyzed for the PP population (number (N) of values substituted by the last observation carried forward (LOCF) method).



| Observation time point | Wound volume NPWT (mm <sup>3</sup> )      | Wound volume SMWC (mm <sup>3</sup> )       |
|------------------------|-------------------------------------------|--------------------------------------------|
| Randomization          | 33359 (95749)<br>5746 (17330)<br>N=44 (1) | 14742 (36523)<br>3905 (11189)<br>N=110 (0) |
| Week 1                 | 11606 (26991)<br>1824 (6113)<br>N=44 (5)  | 13525 (34844)<br>2470 (9479)<br>N=110 (16) |
| Week 3                 | 8636 (24698)<br>777 (3199)<br>N=44 (6)    | 11907 (32047)<br>1864 (8039)<br>N=110 (7)  |
| Week 5                 | 5480 (13967)<br>271 (1790)<br>N=44 (7)    | 8981 (25570)<br>1027 (4745)<br>N=110 (18)  |
| Week 8                 | 3955 (9056)<br>192 (809)<br>N=44 (16)     | 6899 (18607)<br>506 (3915)<br>N=110 (29)   |
| Week 12                | 6052 (16114)<br>71 (681)<br>N=44 (25)     | 5964 (15930)<br>361 (1890)<br>N=110 (77)   |
| Week 16                | 3246 (11245)<br>0 (319)<br>N=44 (15)      | 3396 (10783)<br>57 (609)<br>N=110 (19)     |

Table S15: Wound volume (length x width x depth) for each observation time point during the study treatment time of maximum 16 weeks calculated from width· length and depth as documented in the eCRF. Data show mean (SD) and median (IQR) as well the number (N) of values analyzed for the PP population (number (N) of values substituted by the last observation carried forward (LOCF) method).

| Observation<br>time point | NPWT Granulation |          | NPWT Fibrin |          | NPWT Necrosis |          | SMWC Granulation |          | SMWC Fibrin |          | SMWC Necrosis |          |
|---------------------------|------------------|----------|-------------|----------|---------------|----------|------------------|----------|-------------|----------|---------------|----------|
|                           | eCRF             | W.H.A.T. | eCRF        | W.H.A.T. | eCRF          | W.H.A.T. |                  | eCRF     | W.H.A.T.    | eCRF     | W.H.A.T.      | eCRF     |
| Rando                     | 32 (37)          | 23 (26)  | 18 (27)     | 68 (27)  | 2 (7)         | 9 (15)   | 38 (38)          | 26 (27)  | 21 (29)     | 67 (29)  | 1 (7)         | 7 (15)   |
|                           | 10 (68)          | 13 (37)  | 3 (28)      | 69 (45)  | 0 (0)         | 0 (15)   | 25 (80)          | 16 (42)  | 10 (33)     | 77 (56)  | 0 (0)         | 0 (8)    |
|                           | 44 (1)           | 41 (2)   | 44 (1)      | 41 (2)   | 44 (1)        | 41 (2)   | 110 (0)          | 102 (9)  | 110 (0)     | 102 (9)  | 108 (2)       | 102 (9)  |
| Week 1                    | 72 (37)          | 22 (26)  | 7 (13)      | 70 (28)  | 2 (7)         | 9 (15)   | 54 (35)          | 24 (27)  | 22 (24)     | 72 (27)  | 5 (14)        | 5 (9)    |
|                           | 90 (50)          | 9 (41)   | 0 (10)      | 75 (50)  | 0 (0)         | 0 (11)   | 63 (70)          | 13 (42)  | 13 (28)     | 78 (42)  | 0 (1)         | 0 (6)    |
|                           | 44 (5)           | 41 (8)   | 44 (6)      | 41 (8)   | 44 (7)        | 41 (8)   | 110 (16)         | 102 (27) | 110 (16)    | 102 (27) | 108 (19)      | 102 (27) |
| Week 3                    | 77 (32)          | 16 (24)  | 11 (19)     | 79 (26)  | 1 (4)         | 6 (14)   | 61 (31)          | 24 (27)  | 25 (25)     | 75 (26)  | 4 (11)        | 3 (7)    |
|                           | 93 (34)          | 2 (29)   | 0 (20)      | 91 (37)  | 0 (0)         | 0 (1)    | 70 (50)          | 15 (42)  | 20 (35)     | 83 (41)  | 0 (0)         | 0 (1)    |
|                           | 44 (6)           | 41 (9)   | 44 (7)      | 41 (9)   | 44 (7)        | 41 (9)   | 110 (9)          | 102 (26) | 110 (10)    | 102 (26) | 108 (13)      | 102 (26) |
| Week 5                    | 82 (29)          | 10 (16)  | 9 (19)      | 87 (17)  | 1 (4)         | 3 (9)    | 65 (29)          | 19 (27)  | 24 (24)     | 78 (27)  | 3 (9)         | 3 (11)   |
|                           | 95 (20)          | 4 (11)   | 2 (10)      | 93 (21)  | 0 (0)         | 0 (1)    | 73 (46)          | 4 (34)   | 13 (37)     | 93 (35)  | 0 (0)         | 0 (0)    |
|                           | 44 (7)           | 41 (16)  | 44 (8)      | 41 (16)  | 44 (9)        | 41 (16)  | 110 (19)         | 102 (27) | 110 (22)    | 102 (27) | 108 (22)      | 102 (27) |
| Week 8                    | 85 (27)          | 15 (25)  | 6 (13)      | 82 (26)  | 2 (6)         | 3 (8)    | 74 (27)          | 20 (26)  | 18(21)      | 77 (27)  | 3 (10)        | 3 (12)   |
|                           | 100 (20)         | 1 (16)   | 0 (5)       | 96 (35)  | 0 (0)         | 0 (0)    | 80 (31)          | 3 (38)   | 10 (18)     | 91 (43)  | 0 (0)         | 0 (0)    |
|                           | 44 (9)           | 41 (16)  | 44 (10)     | 41 (16)  | 44 (9)        | 41 (16)  | 110 (18)         | 102 (30) | 110 (21)    | 102 (30) | 108 (25)      | 102 (30) |
| Week 12                   | 86 (26)          | 13 (24)  | 6 (14)      | 85 (26)  | 2 (9)         | 2 (6)    | 77 (27)          | 18 (25)  | 16 (20)     | 80 (25)  | 3 (11)        | 2 (6)    |
|                           | 100 (18)         | 1 (13)   | 0 (4)       | 99 (20)  | 0 (0)         | 0 (0)    | 85 (29)          | 3 (36)   | 10 (20)     | 92 (36)  | 0 (0)         | 0 (0)    |
|                           | 44 (26)          | 41 (34)  | 44 (26)     | 41 (32)  | 44 (28)       | 41 (32)  | 110 (72)         | 101 (78) | 110 (73)    | 102 (79) | 108 (73)      | 102 (80) |
| Week 16                   | 87 (25)          | 12 (22)  | 6 (14)      | 86 (24)  | 0-1 (1)       | 1 (6)    | 80 (30)          | 19 (25)  | 14 (24)     | 80 (26)  | 2 (11)        | 1 (5)    |
|                           | 100 (15)         | 0 (14)   | 0 (1)       | 100 (20) | 0 (0)         | 0 (0)    | 95 (20)          | 5 (36)   | 0 (20)      | 92 (36)  | 0 (0)         | 0 (0)    |
|                           | 44 (14)          | 41 (25)  | 44 (16)     | 41 (25)  | 44 (15)       | 41 (25)  | 110 (18)         | 102 (42) | 110 (21)    | 102 (42) | 108 (24)      | 102 (42) |

1  
2 Table S20: Wound tissue (granulation, fibrin, necrosis) at each observation time point during the study treatment time of maximum 16 weeks separately shown for the data documented in the eCRF  
3 and for the data derived from the photo analysis using the wound healing analyzing too (W.H.A.T.). Data show mean (SD) and median (IQR) as well the number (N) of values analyzed for the PP  
4 population (number (N) of values substituted by the last observation carried forward (LOCF) method).  
5  
6  
7  
8  
9  
10  
11  
12  
13  
14  
15  
16  
17  
18  
19  
20  
21  
22  
23  
24  
25  
26  
27  
28  
29  
30  
31  
32  
33  
34  
35  
36  
37  
38  
39  
40  
41  
42  
43  
44  
45  
46

For peer review only

| Observation time point | Pain Total<br>N=344             | Pain NPWT<br>N=171               |
|------------------------|---------------------------------|----------------------------------|
| Screening              | 1.3 (2.1)<br>0 (2)<br>N=44 (0)  | 1.8 (2.3)<br>1 (3)<br>N=110 (0)  |
| Week 1                 | 0.7 (1.5)<br>0 (1)<br>N=44 (0)  | 1.4 (2.1)<br>0 (3)<br>N=110 (5)  |
| Week 3                 | 0.4 (0.7)<br>0 (1)<br>N=44 (4)  | 1.3 (1.8)<br>0 (2)<br>N=110 (3)  |
| Week 5                 | 0.3 (0.8)<br>0 (0)<br>N=44 (2)  | 1.0 (1.6)<br>0 (2)<br>N=110 (5)  |
| Week 8                 | 0.4 (1.1)<br>0 (0)<br>N=44 (4)  | 0.9 (1.5)<br>0 (2)<br>N=110 (9)  |
| Week 12                | 0.3 (1.0)<br>0 (0)<br>N=44 (11) | 0.7 (1.3)<br>0 (1)<br>N=110 (18) |
| Week 16                | 0.2 (0.7)<br>0 (0)<br>N=44 (14) | 0.5 (1.2)<br>0 (0)<br>N=110 (13) |

Table S16: Pain evaluation at the pre-defined observation time points during the active study treatment time of 16 weeks in the PP population. Data show mean (SD) and median (IQR) as well the number (N) of values analyzed for the PP population (number (N) of values substituted by the last observation carried forward (LOCF) method).

| Observation time point              | EQ5D NPWT                              | EQ5D SMWC                               |
|-------------------------------------|----------------------------------------|-----------------------------------------|
| Screening                           | 0.61 (0.23)<br>0.63 (0.24)<br>N=42 (1) | 0.60 (0.20)<br>0.59 (0.25)<br>N=100 (3) |
| End of therapy                      | 0.65 (0.20)<br>0.78 (0.20)<br>N=26 (2) | 0.81 (0.14)<br>0.87 (0.26)<br>N=8 (0)   |
| End of maximum study treatment time | 0.65 (0.25)                            | 0.66 (0.21)                             |

|                          |                                        |                                        |
|--------------------------|----------------------------------------|----------------------------------------|
|                          | 0.66 (0.43)<br>N=19 (0)                | 0.63 (0.28)<br>N=73 (2)                |
| Follow up after 6 months | 0.75 (0.22)<br>0.78 (0.30)<br>N=26 (0) | 0.70 (0.23)<br>0.77 (0.34)<br>N=73 (2) |

Table S17: Quality of life evaluated with the EQ5D instrument at the pre-defined observation time points during the active study treatment time of 16 weeks in the PP population. Data show mean (SD) and median (IQR) as well the number (N) of values analyzed for the PP population (number (N) of values substituted by the last observation carried forward (LOCF) method).

For peer review only

## Supplementary Appendix

### Table of contents:

- List of investigators
- Supplementary discussion
- Supplementary tables

### List of investigators:

At least one patient was included in the following facilities:

|                                      |                                                                                                                   |
|--------------------------------------|-------------------------------------------------------------------------------------------------------------------|
| 1. PD Dr. med. Achim Neufang         | HSK - Dr. Horst Schmidt Kliniken GmbH<br>Klinik für Gefäßchirurgie<br>Ludwig-Erhard-Straße 100<br>65199 Wiesbaden |
| 2. Dr. med. Holger Lawall            | Asklepios Westklinikum Hamburg<br>Zentrum für Gefäßmedizin<br>Suurheid 20<br>22559 Hamburg                        |
| 3. Prof. Dr. med. Gernold<br>Wozniak | Knappschafts Krankenhaus Bottrop<br>Gefäßchirurgische Klinik<br>Osterfelderstraße 157<br>46242 Bottrop            |
| 4. Prof. Dr. med. Martin Storck      | Städtisches Klinikum Karlsruhe<br>Klinik für Gefäß- und Thoraxchirurgie<br>Moltkestraße 90<br>76133 Karlsruhe     |
| 5. Dr. med. Dirk Hochlenert          | Gemeinschaftspraxis Schlotmann-Hochlenert-Zavaleta-Haberstock<br>Merheimer Straße 217<br>50733 Köln               |
| 6. Dr. med. Gudrun Hetzel            | Klinikum Döbeln<br>Abt. für Gefäßchirurgie<br>Sörmitzer Straße 10<br>04720 Döbeln                                 |
| 7. Dr. med. Karsten Jungheim         | Klinikum Bielefeld Mitte<br>Klinik für Allgemeine Innere Medizin<br>Teutoburger Straße 50<br>33604 Bielefeld      |
| 8. Dr. med. Michael Petzold          | Klinikum Frankfurt/Oder<br>Klinik für Gefäßchirurgie<br>Müllroser Chaussee 7<br>15236 Frankfurt/Oder              |

|                                              |                                            |                                                                                                                                                                       |
|----------------------------------------------|--------------------------------------------|-----------------------------------------------------------------------------------------------------------------------------------------------------------------------|
| 1<br>2<br>3<br>4<br>5<br>6<br>7<br>8         | 9. PD Dr. med. Matthias Weck               | Weißeritztal-Kliniken GmbH<br>Medizinische Klinik III<br>Bürgerstraße 7<br>1705 tal                                                                                   |
| 9<br>10<br>11<br>12<br>13<br>14              | 10. Dr. med. Alexandra Zidek               | Krankenhaus Porz am Rhein<br>Klinik für Gefäßchirurgie<br>Urbacher Weg 19<br>51149 Köln                                                                               |
| 15<br>16<br>17<br>18<br>19                   | 11. Dr. med. Peter Mauckner                | St. Remigius Krankenhaus Opladen<br>Innere Medizin<br>An St. Remigius 26<br>51379 Leverkusen                                                                          |
| 20<br>21<br>22<br>23<br>24<br>25             | 12. Dr. med. Klemens M. Sondern            | Marien Hospital Dortmund-Hombruch<br>Klinik für Innere Medizin/Diabetologie<br>Gablonzstraße 9<br>44225 Dortmund                                                      |
| 26<br>27<br>28<br>29<br>30<br>31<br>32<br>33 | 13. Prof. Dr. med. Thomas<br>Schmitz-Rixen | Universitätsklinikum Frankfurt<br>Zentrum für Chirurgie<br>Klinik für Gefäß- und Endovascularchirurgie<br>Theodor-Stern-Kai 7, Haus 23C/EG<br>60590 Frankfurt am Main |
| 34<br>35<br>36<br>37                         | 14. Dr. med. Walter Wetzels-Roth           | Facharztpraxis für Chirurgie<br>Hindenburgstraße 1<br>86807 Buchloe                                                                                                   |
| 38<br>39<br>40<br>41<br>42<br>43             | 15. Dr. med. Matthias Hahn                 | Helfenstein Klinik Geislingen<br>Allgemein- und Viszeralchirurgie<br>Eybstraße 16<br>73312 Geislingen/Steige                                                          |
| 44<br>45<br>46<br>47<br>48                   | 16. Dr. med. Karsten Glockemann            | Paracelsus-Klinik am Silbersee<br>Wundzentrum Hannover<br>Oertzeweg 24<br>30851 Langenhagen                                                                           |
| 49<br>50<br>51<br>52<br>53<br>54             | 17. PD Dr. med. Farzin Adili               | Klinikum Darmstadt<br>Chirurgische Klinik III<br>Grafenstraße 9<br>64283 Darmstadt                                                                                    |
| 55<br>56<br>57<br>58<br>59<br>60             | 18. Dr. med. Andreas Riemer                | Ortenau Klinikum Offenburg-Ebertplatz<br>Klinik für Allgemein-, Viszeral- und Gefäßchirurgie<br>Ebertplatz 12<br>77654 Offenburg                                      |

|                                             |                                                                                                                                                |
|---------------------------------------------|------------------------------------------------------------------------------------------------------------------------------------------------|
| 19. Dr. med. Thomas Krönert                 | Thüringen-Kliniken "Georgius Agricola" GmbH<br>Klinik für Gefäßchirurgie<br>Rainweg 68<br>7318 feld                                            |
| 20. Dr. med. Matthias Holfeld               | Klinikum Dorothea Christiane Erxleben GmbH<br>Klinik für Allgemein-, Viszeral- und Gefäßchirurgie<br>Ditfurter Weg 24<br>6484 linburg          |
| 21. Prof. Dr. med. Jan Andre´ Schmidt-Lucke | Franziskus-Krankenhaus Berlin<br>Abt. für Innere Medizin<br>Budapester Straße 15-19<br>10787 Berlin                                            |
| 22. Dr. med. Wolf-Rüdiger Klare             | Hegau-Bodensee Klinikum Radolfzell (HBK)<br>Klinik für Innere Medizin<br>Hausherrenstraße 12<br>78315 Radolfzell                               |
| 23. Dr. med. Hansjörg Mühlen                | Diabetologische Schwerpunktpraxis Dr. med. Hansjörg Mühlen & Partner<br>Ruhrorter Straße 195<br>47119 Duisburg                                 |
| 24. Dr. med. Christian Reinhold             | Kliniken Maria Hilf Mönchengladbach<br>Klinik für Gefäßchirurgie und Angiologie<br>Sandradstraße 43<br>41061 Mönchengladbach                   |
| 25. Dr. med. Makarios Paschalidis           | Städtisches Klinikum München/Bogenhausen<br>Klinik für Endokrinologie, Diabetologie und Angiologie<br>Engschalkingerstraße 77<br>81925 München |
| 26. Gerhard Rothenaicher                    | Facharztpraxis für Chirurgie<br>Cosimastraße 2<br>81927 München                                                                                |
| 27. Dr. med. Elke Anne Klug                 | Bürgerhospital Frankfurt am Main<br>Interdisziplinäres Zentrum Diabetischer Fuß (DDG)<br>Nibelungenallee 37- 41<br>60318 Frankfurt am Main     |
| 28. Dr. med. Siamak Pourhassan              | Gemeinschaftspraxis für Chirurgie und Gefäßmedizin<br>Drs. Alter / Pourhassan / Heim<br>Klosterstraße 12<br>46145 Oberhausen                   |
| 29. Dr. med. Jan Theil                      | Evangelisches Krankenhaus Königin Elisabeth Herzberge gGmbH<br>Abt. für Kardiologie, Angiologie und Diabetologie                               |



|                                 |                                                                                                                                                                                     |
|---------------------------------|-------------------------------------------------------------------------------------------------------------------------------------------------------------------------------------|
|                                 | Herzbergstraße 79<br>10365 Berlin                                                                                                                                                   |
| 30. Dr. med. Martin Adolph      | Städtisches Klinikum Neunkirchen gGmbH<br>Abt. für Gefäßchirurgie & Phlebologie<br>Brunnenstraße 20<br>66538 Neunkirchen                                                            |
| 31. Dr. med. Frank von Feldmann | Westküstenklinikum Heide Klinik für Viszeral- und Gefäßchirurgie<br>Esmarchstraße 50<br>25746 Heide/Holstein                                                                        |
| 32. Dr. med. Gerald Engels      | Chir. Praxisgemeinschaft am Bayenthalgürtel<br>Praxis Dr. med. Gerald Engels<br>Bayenthalgürtel 45<br>50968 Köln                                                                    |
| 33. Dr. med. Joachim Oldenburg  | Malteser Krankenhaus – St. Franziskus-Hospital<br>Medizinische Klinik I<br>Abt. für Diabetologie<br>Waldstraße 17<br>24939 Flensburg                                                |
| 34. Dr. med. Philipp Knepe      | St. Marienkrankenhaus Siegen gGmbH<br>Klinik für Gastroenterologie<br>Kampenstraße 51<br>57072 Siegen                                                                               |
| 35. Dr. med. Steffen Hering     | Krankenhaus Bietigheim<br>Klinik für Innere Medizin, Kardiologie, Endokrinologie,<br>Diabetologie und Internistische Intensivmedizin<br>Riedstraße 12<br>74321 Bietigheim-Bissingen |
| 36. Dr. med. Harald Daum        | Asklepios Kliniken Harburg<br>Eißendorfer Pferdeweg 52<br>21075 Hamburg                                                                                                             |
| 37. Dr. med. Lutz Stemler       | Diabetologikum Ludwigshafen<br>Diabetes-Schwerpunktpraxis<br>Ludwigsplatz 9<br>67059 Ludwigshafen                                                                                   |
| 38. Dr. med. Thomas Müller      | Mariannen-Hospital Werl<br>Abt. für Chirurgie<br>Unnaer Straße 15<br>59457 Werl                                                                                                     |
| 39. Dr. med. Karl Zink          | Diabetes Klinik GmbH & Co KG<br>Theodor-Klotzbücher-Straße 12<br>97980 Bad Mergentheim                                                                                              |

|                           |                                                                                     |
|---------------------------|-------------------------------------------------------------------------------------|
| 40. Dr. med. Dirk Lammers | Institut für Diabetesforschung Münster GmbH<br>Hohenzollernring 70<br>48145 Münster |
|---------------------------|-------------------------------------------------------------------------------------|

### Supplementary Discussion

As direct blinding of patients and investigators was not possible due to the nature of the applied treatment methods, issues of blinding have been addressed using independent blinded outcome assessors and the W.H.A.T. for evaluating the wound photographs. For wound size and wound tissue the values documented by the investigators reflect the expected course much better than the W.H.A.T. results. During study planning the W.H.A.T. (<http://www.what-world.com/>) was the only available validated instrument that was able to measure both wound size and wound tissue composition (granulation, fibrin, and necrosis). For the wound surface area, the difference between the clinical measurements and the W.H.A.T. results may have been caused by the different evaluation methods. An elliptical wound surface area was calculated by the investigators using length and width, but most wounds are not elliptical. The independent blinded assessors marked the wound margin on the photograph and the W.H.A.T. calculates the wound surface area automatically afterwards, thus if the wound photo is of good quality the W.H.A.T. is more precise. In addition, the depth of the wound cannot be assessed using a wound photo, thus wound volume has only been evaluated using the clinical measurements provided by the investigators. The values for granulation tissue and fibrin differ significantly between the clinical estimations and the W.H.A.T. results. This may be caused by the quality of the wound photography, the reliability and precision of both the clinical investigator and the W.H.A.T. system and the wound itself. Wounds with invisible, deeper areas cannot be detected without manipulation. Both circumstances possibly affect the results.

### Supplementary tables

| Demographic and baseline parameters (PP-Population) | Total<br>N=154 (100%) | NPWT<br>N=44<br>(28.6%) | SMWC<br>N=110<br>(71.4%) |
|-----------------------------------------------------|-----------------------|-------------------------|--------------------------|
| Sex                                                 | N=154                 | N=44                    | N=110                    |
| Male                                                | 113 (73.4%)           | 29 (65.9%)              | 84 (76.4%)               |
| Female                                              | 41 (26.6%)            | 15 (34.1%)              | 26 (23.6%)               |
| Age in years                                        | N=154                 | N=44                    | N=110                    |
| Mean (SD)                                           | 67.4 (10.6)           | 66.5 (11.0)             | 67.8 (10.4)              |
| Height in cm                                        | N=153                 | N=43                    | N=110                    |
| Mean (SD)                                           | 173.8 (12.9)          | 173.5 (17.4)            | 174.0 (10.7)             |
| Weight in kg                                        | N=150                 | N=42                    | N=108                    |
| Mean (SD)                                           | 95.4 (23.3)           | 96.2 (21.6)             | 95.1 (24.0)              |
| Alcohol                                             | N=153                 | N=44                    | N=109                    |
| Occasionally                                        | 71 (46.4%)            | 22 (50.0%)              | 49 (45.0%)               |

|                                                                      |               |              |              |
|----------------------------------------------------------------------|---------------|--------------|--------------|
| Chronic                                                              | 3 (2.0%)      | 1 (2.3%)     | 2 (1.8%)     |
| No                                                                   | 79 (51.6%)    | 21 (47.7%)   | 58 (53.2%)   |
| <del>Nicotine</del> Smoking                                          | N=154         | N=44         | N=110        |
| No                                                                   | 16 (10.4%)    | 2 (4.5%)     | 14 (12.7%)   |
| Yes                                                                  | 138 (89.6%)   | 42 (95.5%)   | 96 (87.3%)   |
| Number of years (Mean (SD))                                          | 37.0 (9.2)    | 42.0 (2.8)   | 36.3 (9.7)   |
| Packs / day (Mean)                                                   | 1.0           | 1.0          | 1.0          |
| Drugs                                                                | N=153         | N=44         | N=109        |
| Occasionally                                                         | 0 (0%)        | 0 (0%)       | 0 (0%)       |
| Chronic                                                              | 1 (0.7%)      | 0 (0%)       | 1 (0.9%)     |
| No                                                                   | 152 (99.3%)   | 44 (100%)    | 108 (99.1%)  |
| Requiring dialysis                                                   | N=154         | N=44         | N=110        |
| Yes                                                                  | 11 (7.1 %)    | 2 (4.5%)     | 9 (8.2%)     |
| No                                                                   | 143 (92.9%)   | 42 (95.5%)   | 101 (91.8%)  |
| Allergies                                                            | N=154         | N=44         | N=110        |
| Yes                                                                  | 16 (10.4%)    | 6 (13.6%)    | 10 (9.1%)    |
| No                                                                   | 138 (89.6%)   | 38 (86.4%)   | 100 (90.9%)  |
| Subjective assessment of nutritional condition                       | N=150         | N=43         | N=107        |
| Well-nourished                                                       | 147 (98.0%)   | 42 (97.7%)   | 105 (98.1%)  |
| Moderately malnourished or suspected malnutrition                    | 3 (2.0%)      | 1 (2.3%)     | 2 (1.9%)     |
| Malnourished                                                         | 0 (0%)        | 0 (0%)       | 0 (0%)       |
| Peripheral arterial occlusive disease (PAOD)                         | N=109 (70.8%) | N=29 (65.9%) | N=80 (72.7%) |
| without critical limb ischemia                                       | 103 (94.5%)   | 28 (96.6%)   | 75 (93.8%)   |
| with critical limb ischemia                                          | 6 (5.5%)      | 1 (3.4%)     | 5 (6.3%)     |
| Rutherford classification for chronic limb ischemia (Grade/Category) | N=109         | N=29         | N=80         |
| 0/0 Asymptomatic—no hemodynamically significant occlusive disease    | 13 (11.9%)    | 4 (13.8%)    | 9 (11.3%)    |
| I/1 Mild claudication                                                | 13 (11.9%)    | 2 (6.9%)     | 11 (13.8%)   |
| I/2 Moderate claudication                                            | 8 (7.3%)      | 0 (0.0%)     | 8 (10.0%)    |
| I/3 Severe claudication                                              | 4 (3.7%)      | 1 (3.4%)     | 3 (3.8%)     |
| II/4 Ischemic rest pain                                              | 1 (0.9%)      | 1 (3.4%)     | 0 (0%)       |
| III/5 Minor tissue loss—non healing ulcer, focal gangrene with       | 67 (61.5%)    | 21 (72.4%)   | 46 (57.5%)   |

|                                                                                                      |               |               |               |
|------------------------------------------------------------------------------------------------------|---------------|---------------|---------------|
| diffuse pedal ischemia                                                                               |               |               |               |
| III/6 Major tissue loss—extending above transmetatarsal level, functional foot no longer salvageable | 3 (2.8%)      | 0 (0.0%)      | 3 (3.8%)      |
| Revascularisation before study start                                                                 | N=9 (5.8%)    | N=1 (2.3%)    | N=8 (7.3%)    |
| Percutaneous transluminal angioplasty (PTA)                                                          | 5 (55.6%)     | 0 (0.0%)      | 5 (62.5%)     |
| PTA + Stent                                                                                          | 0 (0%)        | 0 (0%)        | 0 (0%)        |
| Veins-Bypass                                                                                         | 1 (11.1%)     | 1 (100.0%)    | 0 (11.1%)     |
| Polytetrafluoroethylene (PTFE) Bypass                                                                | 1 (11.1%)     | 0 (0%)        | 1 (12.5%)     |
| Thromboendarterectomy and patch plastic                                                              | 2 (22.2%)     | 0 (0%)        | 2 (25.0%)     |
| Revascularization with influence on the wound                                                        | 9 of 9 (100%) | 1 of 1 (100%) | 0 of 8 (100%) |
| Sufficient revascularization result                                                                  | 9 of 9 (100%) | 1 of 1 (100%) | 8 of 8 (100%) |
| Insufficient revascularization result                                                                | 0 of 9 (0%)   | 0 of 1 (0%)   | 0 of 8 (0%)   |
| Revascularization result not assessable                                                              | 0 of 9 (0%)   | 0 of 1 (0%)   | 0 of 8 (0%)   |

Table S1: Patient demographics and baseline characteristics of the Per-Protocol (PP) population. Data are N (%) and Mean (SD). “N=” is stating the number of patients with actual available information. Findings, diagnoses and procedures documented by the investigators are presented.

| Observation time point | Wound surface NPWT                                         |                                      | Wound surface SMWC                                         |                                       |
|------------------------|------------------------------------------------------------|--------------------------------------|------------------------------------------------------------|---------------------------------------|
|                        | Calculated from width and length (according to eCRF entry) | Results of the photo analysis        | Calculated from width and length (according to eCRF entry) | Results of the photo analysis         |
| Randomization          | 1060 (1536)<br>550 (1236)<br>N=171 (2)                     | 687 (879)<br>321 (760)<br>N=118 (10) | 1141 (3247)<br>471 (1007)<br>N=174 (0)                     | 664 (1050)<br>316 (658)<br>N=129 (13) |
| Week 1                 | 847 (1489)<br>397 (801)<br>N=171 (15)                      | 643 (820)<br>329 (750)<br>N=118 (32) | 1085 (3234)<br>395 (867)<br>N=174 (25)                     | 713 (1065)<br>307 (749)<br>N=129 (36) |
| Week 3                 | 810 (1472)<br>314 (860)<br>N=171 (24)                      | 590 (742)<br>273 (633)<br>N=118 (28) | 1025 (3242)<br>390 (913)<br>N=174 (22)                     | 701 (1212)<br>266 (768)<br>N=129 (35) |
| Week 5                 | 717 (1379)<br>275 (769)<br>N=171 (37)                      | 607 (828)<br>231 (843)<br>N=118 (42) | 759 (1466)<br>267 (824)<br>N=174 (41)                      | 610 (1119)<br>219 (635)<br>N=129 (38) |
| Week 8                 | 636 (1322)<br>220 (712)                                    | 495 (770)<br>182 (561)               | 674 (1410)<br>186 (783)                                    | 501 (937)<br>165 (481)                |

|         |             |            |             |             |
|---------|-------------|------------|-------------|-------------|
|         | N=171 (52)  | N=118 (48) | N=174 (42)  | N=129 (42)  |
| Week 12 | 549 (858)   | 457 (742)  | 570 (940)   | 493 (950)   |
|         | 165 (964)   | 134 (494)  | 169 (632)   | 133 (498)   |
|         | N=171 (110) | N=118 (88) | N=174 (124) | N=129 (104) |
| Week 16 | 440 (810)   | 334 (649)  | 493 (1095)  | 351 (750)   |
|         | 79 (471)    | 114 (363)  | 69 (415)    | 77 (320)    |
|         | N=171 (80)  | N=118 (66) | N=174 (63)  | N=129 (56)  |

Table S2: WChange of wound surface area in the course of the study treatment time of maximum 16 weeks at each observation time point -in the ITT-population. WChange of wound surface area at each observation time point until end of maximum study treatment time in the course of the study treatment time of maximum of 16 weeks is separately shown for the calculated data from width and length as documented in the eCRF and for the data derived from the photo analysis. An elliptical wound surface area has been calculated from the documented width and length (eCRF) [ $(\pi / 4) \times \text{length} \times \text{width} = \text{area}$ ]. Data show mean (SD) and median (IQR) as well the number (N) of values analyzed for the ITT population (number (N) of values substituted by the last observation carried forward (LOCF) method).

| Observation time point | Wound volume NPWT (mm <sup>3</sup> ) | Wound volume SMWC (mm <sup>3</sup> ) |
|------------------------|--------------------------------------|--------------------------------------|
| Randomization          | 22498 (58930)                        | 21740 (74181)                        |
|                        | 4710 (15048)                         | 4759 (12888)                         |
|                        | N=171 (2)                            | N=174 (0)                            |
| Week 1                 | 13203 (28709)                        | 19979 (73143)                        |
|                        | 2487 (6908)                          | 3533 (11407)                         |
|                        | N=171 (15)                           | N=174 (26)                           |
| Week 3                 | 10708 (28521)                        | 16217 (67494)                        |
|                        | 1884 (6857)                          | 2293 (8831)                          |
|                        | N=171 (24)                           | N=174 (23)                           |
| Week 5                 | 7700 (19719)                         | 11286 (32566)                        |
|                        | 1166 (5338)                          | 1365 (7539)                          |
|                        | N=171 (37)                           | N=174 (42)                           |
| Week 8                 | 5592 (11535)                         | 8772 (27674)                         |
|                        | 785 (4604)                           | 812 (5258)                           |
|                        | N=171 (78)                           | N=174 (67)                           |
| Week 12                | 5333 (12422)                         | 6639 (16454)                         |
|                        | 565 (3913)                           | 625 (4083)                           |
|                        | N=171 (119)                          | N=174 (133)                          |
| Week 16                | 3880 (10534)                         | 5465 (14874)                         |
|                        | 141 (1890)                           | 200 (1587)                           |

|  |            |            |
|--|------------|------------|
|  | N=171 (83) | N=174 (64) |
|--|------------|------------|

Table S3: ~~W~~Change of wound volume in the course of at each observation time point during the study treatment time of maximum 16 weeks in the ITT-population. ~~Change of w~~Wound volume (length x width x depth) in the course of the study ~~treatment time of maximum 16 weeks- was~~ calculated from width, length and depth as documented in the eCRF. Data show mean (SD) and median (IQR) as well the number (N) of values analyzed for the ITT population (number (N) of values substituted by the last observation carried forward (LOCF) method).

For peer review only

| Observation<br>time point | NPWT Granulation |          | NPWT Fibrin |          | NPWT Necrosis |          | SMWC Granulation |           | SMWC Fibrin |          | SMWC Necrosis |          |
|---------------------------|------------------|----------|-------------|----------|---------------|----------|------------------|-----------|-------------|----------|---------------|----------|
|                           | eCRF             | W.H.A.T. | eCRF        | W.H.A.T. | eCRF          | W.H.A.T. | eCRF             | W.H.A.T.  | eCRF        | W.H.A.T. | eCRF          | W.H.A.T. |
| Rando                     | 34 (36)          | 22 (25)  | 21 (28)     | 71 (27)  | 3 (10)        | 7 (15)   | 34 (37)          | 24 (26)   | 22 (29)     | 69 (28)  | 2 (9)         | 7 (14)   |
|                           | 20 (70)          | 12 (37)  | 10 (30)     | 79 (46)  | 0 (0)         | 0 (5)    | 20 (71)          | 14 (39)   | 10 (40)     | 79 (44)  | 0 (0)         | 0 (8)    |
|                           | 171 (2)          | 118 (8)  | 170 (4)     | 118 (8)  | 169 (5)       | 118 (8)  | 174 (3)          | 129 (12)  | 174 (1)     | 129 (12) | 172 (2)       | 129 (12) |
| Week 1                    | 58 (35)          | 21 (25)  | 19 (22)     | 73 (27)  | 5 (13)        | 6 (12)   | 49 (35)          | 21 (25)   | 24 (27)     | 74 (26)  | 6 (15)        | 5 (9)    |
|                           | 70 (70)          | 10 (36)  | 10 (30)     | 81 (47)  | 0 (2)         | 0 (5)    | 50 (70)          | 10 (36)   | 15 (31)     | 85 (40)  | 0 (5)         | 0 (5)    |
|                           | 171 (16)         | 118 (32) | 71 (19)     | 118 (32) | 169 (23)      | 118 (32) | 174 (28)         | 129 (36)  | 174 (27)    | 129 (36) | 172 (30)      | 129 (36) |
| Week 3                    | 67 (31)          | 16 (23)  | 18 (22)     | 80 (25)  | 5 (13)        | 4 (11)   | 57 (32)          | 21 (25)   | 25 (26)     | 77 (25)  | 5 (13)        | 3 (7)    |
|                           | 80 (55)          | 5 (25)   | 10 (30)     | 91 (30)  | 0 (0)         | 0 (1)    | 60 (60)          | 10 (36)   | 20 (35)     | 85 (36)  | 0 (3)         | 0 (1)    |
|                           | 171 (26)         | 118 (27) | 171 (30)    | 118 (27) | 169 (28)      | 118 (27) | 174 (24)         | 129 (35)  | 174 (25)    | 129 (35) | 172 (30)      | 129 (35) |
| Week 5                    | 70 (30)          | 15 (22)  | 18 (24)     | 83 (22)  | 4 (13)        | 2 (8)    | 62 (31)          | 18 (26)   | 23 (25)     | 80 (26)  | 4 (12)        | 3 (10)   |
|                           | 80 (45)          | 6 (21)   | 10 (25)     | 91 (26)  | 0 (0)         | 0 (1)    | 63 (50)          | 4 (32)    | 10 (39)     | 93 834   | 0 (0)         | 0 (0)    |
|                           | 171 (36)         | 118 (43) | 171 (38)    | 118 (43) | 169 (42)      | 118 (43) | 174 (44)         | 129 (36)  | 174 (47)    | 129 (36) | 172 (46)      | 129 (36) |
| Week 8                    | 74 (30)          | 16 (23)  | 17 (24)     | 82 (24)  | 4 (13)        | 2 (6)    | 70 (29)          | 17 (24)   | 17 (21)     | 80 (25)  | 5 (13)        | 3 (11)   |
|                           | 90 (40)          | 4 (27)   | 10 (20)     | 93 (33)  | 0 (0)         | 0 (0)    | 80 (40)          | 3 (33)    | 10 (20)     | 92 (36)  | 0 (0)         | 0 (0)    |
|                           | 171 (53)         | 118 (48) | 171 (56)    | 118 (48) | 171 (59)      | 118 (48) | 174 (44)         | 129 (43)  | 174 (49)    | 129 (43) | 174 (52)      | 129 (43) |
| Week 12                   | 75 (30)          | 15 (23)  | 17 (25)     | 83 (24)  | 4 (13)        | 1 (5)    | 73 (29)          | 16 (23)   | 16 (20)     | 82 (23)  | 5 (13)        | 2 (6)    |
|                           | 90 (40)          | 4 (22)   | 5 (20)      | 96 (23)  | 0 (0)         | 0 (0)    | 80 (38)          | 3 (29)    | 10 (20)     | 93 (32)  | 0 (0)         | 0 (0)    |
|                           | 171(115)         | 118 (89) | 171(118)    | 118 (89) | 171(119)      | 118 (89) | 174(124)         | 129(102)  | 174(125)    | 129(102) | 172(126)      | 129(102) |
| Week 16                   | 77 (30)          | 13 (22)  | 14 (22)     | 86 (24)  | 3 (10)        | 1 (6)    | 76 (30)          | 17 (24)   | 15 (24)     | 81 (24)  | 3 (13)        | 2 (6)    |
|                           | 90 (40)          | 1 (17)   | 2 (20)      | 98 (19)  | 0 (0)         | 0 (0)    | 90 (40)          | 4 (31)    | 5 (20)      | 93 (35)  | 0 (0)         | 0 (0)    |
|                           | 171 (78)         | 118 (66) | 171 (79)    | 118 (66) | 171 (82)      | 118 (66) | 174 (62)         | 129 (576) | 174 (65)    | 129 (56) | 174 (66)      | 129 (56) |

1  
2  
3  
4  
5  
6  
7  
8  
9  
10  
11  
12  
13  
14  
15  
16  
17  
18  
19  
20  
21  
22  
23  
24  
25  
26  
27  
28  
29  
30  
31  
32  
33  
34  
35  
36  
37  
38  
39  
40  
41  
42  
43  
44  
45  
46

Table S1: ~~W~~Change of wound tissue composition ~~in the course of at each observation time point during~~ the study treatment time of maximum 16 week in the ITT-population. ~~Change of W~~wound tissue (granulation, fibrin, and necrosis) ~~is in the course of the study treatment time of maximum 16 weeks~~ separately shown for the data documented in the eCRF and for the data derived from the photo analysis using the Wound Healing Analyzing Tool (W.H.A.T.). Data show mean (SD) and median (IQR) as well the number (N) of values analyzed for the ITT population (number (N) of values substituted by the last observation carried forward (LOCF) method).

For peer review only



| Observation time point | Pain Total<br>N=344               | Pain NPWT<br>N=171               | Pain SMWC<br>N=173               |
|------------------------|-----------------------------------|----------------------------------|----------------------------------|
| Screening              | 2.1 (2.4)<br>1 (4)<br>N=344 (0)   | 2.1 (2.3)<br>1 (4)<br>N=171 (0)  | 2.1 (2.4)<br>1 (4)<br>N=173 (0)  |
| Week 1                 | 1.7 (2.2)<br>1 (3)<br>N=344 (6)   | 1.6 (2.2)<br>0 (2)<br>N=171 (1)  | 1.8 (2.2)<br>1 (3)<br>N=173 (5)  |
| Week 3                 | 1.5 (2.0)<br>1 (2)<br>N=344 (27)  | 1.3 (1.9)<br>0 (2)<br>N=171 (11) | 1.7 (2.1)<br>1 (3)<br>N=173 (16) |
| Week 5                 | 1.3 (1.9)<br>0 (2)<br>N=344 (45)  | 1.2 (1.9)<br>0 (2)<br>N=171 (21) | 1.4 (2.0)<br>0 (2)<br>N=173 (24) |
| Week 8                 | 1.3 (1.9)<br>0 (2)<br>N=344 (70)  | 1.2 (1.9)<br>0 (2)<br>N=171 (38) | 1.3 (1.9)<br>0 (2)<br>N=173 (32) |
| Week 12                | 1.1 (1.8)<br>0 (2)<br>N=344 (115) | 1.2 (1.9)<br>0 (2)<br>N=171 (64) | 1.1 (1.8)<br>0 (2)<br>N=173 (51) |
| Week 16                | 1.0 (1.7)<br>0 (1)<br>N=344 (129) | 1.0 (1.7)<br>0 (2)<br>N=171 (76) | 0.9 (1.7)<br>0 (1)<br>N=173 (53) |

Table S2: Pain in the course of the study treatment time of maximum 16 weeks in the ITT-population. Pain evaluation at the pre-defined observation time points during the active study treatment time of 16 weeks in the ITT population. Data show mean (SD) and median (IQR) as well the number (N) of values analyzed for the ITT population (number (N) of values substituted by the last observation carried forward (LOCF) method).

| Observation time point | EQ5D NPWT                              | EQ5D SMWC                               |
|------------------------|----------------------------------------|-----------------------------------------|
| Screening              | 0,53 (0,27)<br>0,53 (0,2)<br>N=156 (2) | 0,53 (0,24)<br>0,53 (0,18)<br>N=159 (3) |
| End of therapy         | 0,67 (0,24)<br>0,77 (0,29)<br>N=62 (2) | 0,72 (0,17)<br>0,66 (0,35)<br>N=13 (0)  |

|                                     |             |             |
|-------------------------------------|-------------|-------------|
| End of maximum study treatment time | 0,66 (0,22) | 0,61 (0,25) |
|                                     | 0,66 (0,28) | 0,63 (0,24) |
|                                     | N=63 (2)    | N=95 (2)    |
| Follow up after 6 months            | 0,69 (0,26) | 0,67 (0,23) |
|                                     | 0,77 (0,35) | 0,63 (0,39) |
|                                     | N=93 (3)    | N=97 (2)    |

Table S3: Quality of life (EQ5D) in the course of the study treatment time of 16 week in the ITT-population. Quality of life evaluated with the EQ5D instrument at the pre-defined observation time points during the active study treatment time of 16 weeks in the ITT-population. Data show mean (SD) and median (IQR) as well the number (N) of values analyzed for the ITT population (number (N) of values substituted by the last observation carried forward (LOCF) method).

| Wound surface area<br>mm <sup>2</sup> | Small wounds   |              |              |       | Big wounds     |              |              |       |
|---------------------------------------|----------------|--------------|--------------|-------|----------------|--------------|--------------|-------|
|                                       | Total<br>N=173 | NPWT<br>N=83 | SMWC<br>N=90 | p     | Total<br>N=172 | NPWT<br>N=88 | SMWC<br>N=84 | p     |
| N (LOCF)                              | 2              | 2            | 0            | 0.232 | 0              | 0            | 0            | 0.193 |
| Mean (SD)                             | 213 (136)      | 212 (138)    | 213 (135)    |       | 1995 (3377)    | 1860 (1805)  | 2135 (4474)  |       |
| Median (IQR)                          | 188 (220)      | 176 (220)    | 196 (222)    |       | 1276 (1482)    | 1364 (1242)  | 1242 (1708)  |       |
| Min - Max                             | 12-484         | 20-484       | 12-471       |       | 491-40773      | 520-13188    | 491-40773    |       |

Table S4: Wound surface area for small and big wounds. Data show the number (N) of participants available for the analysis in total and for both treatment arms, the number (N) of values substituted by the last observation carried forward (LOCF) method; mean (SD), median (IQR); and minimum (min) and maximum (max).

| Wound closure rate                           | NPWT (N=171) | SMWC (N=174) | p    |
|----------------------------------------------|--------------|--------------|------|
| <b>Small wounds</b>                          | <b>N=83</b>  | <b>N=90</b>  |      |
| Within 16 weeks maximum study treatment time | 12 (14.5 %)  | 16 (17.8 %)  | 0.6  |
| At follow up after 6 months                  | 13 (15.7 %)  | 24 (26.7 %)  | 0.10 |

Table S5: Wound closure rates within the maximum study treatment time of 16 weeks and within the study observation time of 6 months for small wounds. Data show the number (N) of participants available for the analysis in total and for both treatment arms and the number of patients with wound closure (N) within 16 weeks and after 6 months as well the percentage (%) of patients achieving the endpoints within both treatment arms.

| Wound closure rate                           | NPWT (N=171) | SMWC (N=174) | P    |
|----------------------------------------------|--------------|--------------|------|
| <b>Big wounds</b>                            | <b>N=88</b>  | <b>N=84</b>  |      |
| Within 16 weeks maximum study treatment time | 13 (14.8 %)  | 5 (6.0 %)    | 0.08 |
| At follow up after 6 months                  | 11 (12.5 %)  | 12 (14.3 %)  | 0.82 |

Table S6: Wound closure rates within the maximum study treatment time of 16 weeks and within the study observation time of 6 months for big wounds. Data show the number (N) of participants available for the analysis in total and for both

treatment arms and the number of patients with wound closure (N) within 16 weeks and after 6 months as well the percentage (%) of patients achieving the endpoints within both treatment arms.

| <b>Time until min. 95 % granulation tissue for small wounds</b> | <b>Total (N=100)</b> | <b>NPWT (N=52)</b> | <b>SMWC (N=48)</b> | <b>p</b> |
|-----------------------------------------------------------------|----------------------|--------------------|--------------------|----------|
| Mean (SD)                                                       | 38.6 (37.4)          | 28.5 (30.0)        | 49.5 (41.6)        | 0.005    |
| Median (IQR)                                                    | 26.5 (50.0)          | 20.0 (28.0)        | 48.0 (79.0)        |          |
| Min-Max                                                         | 0-114                | 0-113              | 0-114              |          |

Table S7: Time until optimal preparation of the wound bed (min. 95 % granulation tissue) for the subgroup of small wounds. Data show the number (N) of participants available for the analysis in total and for both treatment arms; mean (SD); median (IQR); and minimum (min) and maximum (max).

| <b>Time until min 95 % granulation tissue for big wounds</b> | <b>Total (N=80)</b> | <b>NPWT (N=47)</b> | <b>SMWC (N=33)</b> | <b>p</b> |
|--------------------------------------------------------------|---------------------|--------------------|--------------------|----------|
| Mean (SD)                                                    | 47.8 (40.8)         | 43.4 (37.9)        | 54.0 (44.6)        | 0.27     |
| Median (IQR)                                                 | 36.5 (70.0)         | 35.0 (61.0)        | 56.0 (105.0)       |          |
| Min-Max                                                      | 0-127               | 0-127              | 0-115              |          |

Table S8: Time until optimal preparation of the wound bed (min 95 % granulation tissue) for the subgroup of big wounds. Data show the number (N) of participants available for the analysis in total and for both treatment arms; mean (SD); median (IQR); and minimum (min) and maximum (max).

| <b>Amputations &amp; Resections</b>                    | <b>Total</b> | <b>NPWT</b> | <b>SMWC</b> | <b>p</b> |
|--------------------------------------------------------|--------------|-------------|-------------|----------|
| <b>Small wounds</b>                                    | <b>N=173</b> | <b>N=83</b> | <b>N=90</b> |          |
| No. of patients with amputations or resections [N (%)] | 35 (20.2%)   | 19 (22.9%)  | 16 (17.8%)  | 0.45 (F) |
| No. of performed amputations and resections [N]        | 50           | 22          | 28          | 0.51 (U) |
| No. of patients with minor amputations [N (%)]         | 35 (20.2%)   | 19 (22.9%)  | 16 (17.8%)  | 0.45 (F) |
| No. of patients with major amputations [N (%)]         | 0 (0%)       | 0 (0%)      | 0 (0%)      | -        |

Table S9: Amputations and resections in the subgroup of small wounds. Data show the number (N) of participants available for the analysis in total and for both treatment arms and the number (N) and the percentage (%) of patients with amputations or resections and minor and major amputations.

| <b>Amputations &amp; Resections</b> | <b>Total</b> | <b>NPWT</b> | <b>SMWC</b> | <b>p</b> |
|-------------------------------------|--------------|-------------|-------------|----------|
| <b>Big wounds</b>                   | <b>N=172</b> | <b>N=88</b> | <b>N=84</b> |          |

|                                                        |            |            |            |          |
|--------------------------------------------------------|------------|------------|------------|----------|
| No. of patients with amputations or resections [N (%)] | 36 (20.9%) | 16 (18.2%) | 20 (23.8%) | 0.45 (F) |
| No. of performed amputations and resections [N]        | 52         | 45         | 57         | 0.41 (U) |
| No. of patients with minor amputations [N (%)]         | 34 (19.8%) | 14 (15.9%) | 20 (23.8%) | 0.25 (F) |
| No. of patients with major amputations [N (%)]         | 2 (1.2%)   | 2 (2.3%)   | 0 (0%)     | 0.50 (F) |

Table S10: Amputations and resections in the subgroup of big wounds. Data show the number (N) of participants available for the analysis in total and for both treatment arms and the number (N) and the percentage (%) of patients with amputations or resections and minor and major amputations.

| Wound closure rate                     | Total<br>N=154 | NPWT<br>N=44 | SMWC<br>N=110 | p     |
|----------------------------------------|----------------|--------------|---------------|-------|
| Wound closures [N (%)] within 16 weeks | 33 (21.4 %)    | 14 (31.8%)   | 19 (17.3%)    | 0.053 |
| Wound closures [N (%)] after 6 months  | 41 (26.6 %)    | 11 (25.0%)   | 30 (27.3%)    | 0.84  |

Table S11: Wound closure rate after 6 months and in the PP-population. Data show the number (N) of participants available for the analysis in total and for both treatment arms and the number (N) and the percentage (%) of patients with wound closures within 16 weeks and after 6 months.

| Time until min. 95 % granulation tissue | Total (N=100) | NPWT (N=38) | SMWC (N=62) | p      |
|-----------------------------------------|---------------|-------------|-------------|--------|
| Mean (SD)                               | 43.8 (42.3)   | 23.8 (31.7) | 56.0 (43.5) | <0.001 |
| Median (IQR)                            | 30.0 (76)     | 8.5 (28.0)  | 56.0 (96.0) |        |
| Min - Max                               | 0 - 127       | 0 - 127     | 0 - 115     |        |

Table S12: Time until optimal preparation of the wound for further treatment (min 95 % granulation tissue) in the PP-population. Data show the number (N) of participants available for the analysis in total and for both treatment arms; mean (SD); median (IQR); and minimum (min) and maximum (max).

| Recurrences                              | Total (N=154) | NPWT (N=44) | SMWC (N=110) | p    |
|------------------------------------------|---------------|-------------|--------------|------|
| No. of patients with recurrences [N (%)] | 8 (5.2 %)     | 3 (8.1 %)   | 5 (5.3%)     | 0.69 |
| No. of recurrences [N]                   | 9             | 4           | 5            | 0.38 |

Table S13: Recurrences in the PP-population. Data show the number (N) of participants available for the analysis in total and for both treatment arms and the number (N) and the percentage (%) of patients with recurrences.

| Amputations & Resections                             | Total (N=154) | NPWT<br>(N=44) | SMWC<br>(N=110) | p    |
|------------------------------------------------------|---------------|----------------|-----------------|------|
| No. of patients with amputation or resection [N (%)] | 30 (19.5%)    | 9 (20.5%)      | 21 (21.4%)      | 0.83 |

|                                                |            |           |            |      |
|------------------------------------------------|------------|-----------|------------|------|
| No. of amputations or resections [N]           | 39         | 11        | 28         | 0.86 |
| No. of patients with Minor-Amputations [N (%)] | 30 (18.9%) | 9 (12.8%) | 21 (21.4%) | 0.83 |
| No. of patients with Major-Amputations [N (%)] | 0 (0%)     | 0 (0%)    | 0 (0%)     | -    |

Table S14: Amputations and resections in the PP-population. Data show the number (N) of participants available for the analysis in total and for both treatment arms and the number (N) and the percentage (%) of patients with amputations or resections and minor and major amputations.

| Observation time point | Wound surface NPWT                                         |                               | Wound surface SMWC     |                                                            |
|------------------------|------------------------------------------------------------|-------------------------------|------------------------|------------------------------------------------------------|
|                        | Calculated from width and length (according to eCRF entry) | Results of the photo analysis | Observation time point | Calculated from width and length (according to eCRF entry) |
| Randomization          | 964 (1392)                                                 | 633 (795)                     | 878 (1266)             | 669 (1143)                                                 |
|                        | 345 (1426)                                                 | 299 (705)                     | 373 (889)              | 294 (692)                                                  |
|                        | N= 44 (1)                                                  | N=41 (3)                      | N= 110 (0)             | N=102 (9)                                                  |
| Week 1                 | 525 (696)                                                  | 524 (614)                     | 827 (1238)             | 706 (1138)                                                 |
|                        | 224 (408)                                                  | 318 (561)                     | 306 (863)              | 289 (775)                                                  |
|                        | N= 44 (5)                                                  | N=41 (8)                      | N= 110 (16)            | N=102 (27)                                                 |
| Week 3                 | 428 (635)                                                  | 477 (737)                     | 803 (1306)             | 714 (1316)                                                 |
|                        | 176 (378)                                                  | 165 (424)                     | 238 (867)              | 259 (656)                                                  |
|                        | N= 44 (6)                                                  | N=41 (9)                      | N= 110 (7)             | N=102 (26)                                                 |
| Week 5                 | 355 (590)                                                  | 418 (602)                     | 650 (1157)             | 607 (1212)                                                 |
|                        | 100 (291)                                                  | 165 (435)                     | 161 (670)              | 167 (545)                                                  |
|                        | N= 44 (8)                                                  | N=41 (15)                     | N= 110 (18)            | N=102 (29)                                                 |
| Week 8                 | 284 (528)                                                  | 320 (530)                     | 569 (1072)             | 479 (990)                                                  |
|                        | 53 (217)                                                   | 83 (264)                      | 106 (443)              | 123 (397)                                                  |
|                        | N= 44 (8)                                                  | N=41 (16)                     | N= 110 (17)            | N=102 (29)                                                 |
| Week 12                | 283 (580)                                                  | 289 (537)                     | 528 (1024)             | 474 (1006)                                                 |
|                        | 14 (130)                                                   | 62 (175)                      | 79 (419)               | 111 (407)                                                  |
|                        | N= 44 (24)                                                 | N=41 (32)                     | N= 110 (71)            | N=102 (80)                                                 |
| Week 16                | 190 (416)                                                  | 179 (333)                     | 386 (1124)             | 319 (724)                                                  |
|                        | 0 (95)                                                     | 30 (204)                      | 31 (159)               | 65 (256)                                                   |
|                        | N= 44 (14)                                                 | N=41 (25)                     | N= 110 (19)            | N=102 (42)                                                 |

Table S18: Change of wWound surface area at each observation time point during the study treatment time of maximum 16 weeks separately shown for the calculated data from width and length as documented in the eCRF and for the data derived from the photo analysis using W.H.A.T. Data show mean (SD) and median (IQR) as well the number (N) of values analyzed for the PP population (number (N) of values substituted by the last observation carried forward (LOCF) method).

| Observation time point | Wound volume NPWT (mm <sup>3</sup> )      | Wound volume SMWC (mm <sup>3</sup> )       |
|------------------------|-------------------------------------------|--------------------------------------------|
| Randomization          | 33359 (95749)<br>5746 (17330)<br>N=44 (1) | 14742 (36523)<br>3905 (11189)<br>N=110 (0) |
| Week 1                 | 11606 (26991)<br>1824 (6113)<br>N=44 (5)  | 13525 (34844)<br>2470 (9479)<br>N=110 (16) |
| Week 3                 | 8636 (24698)<br>777 (3199)<br>N=44 (6)    | 11907 (32047)<br>1864 (8039)<br>N=110 (7)  |
| Week 5                 | 5480 (13967)<br>271 (1790)<br>N=44 (7)    | 8981 (25570)<br>1027 (4745)<br>N=110 (18)  |
| Week 8                 | 3955 (9056)<br>192 (809)<br>N=44 (16)     | 6899 (18607)<br>506 (3915)<br>N=110 (29)   |
| Week 12                | 6052 (16114)<br>71 (681)<br>N=44 (25)     | 5964 (15930)<br>361 (1890)<br>N=110 (77)   |
| Week 16                | 3246 (11245)<br>0 (319)<br>N=44 (15)      | 3396 (10783)<br>57 (609)<br>N=110 (19)     |

Table S15: ~~W~~Change of wound volume (length x width x depth) ~~in the course of~~ for each observation time point during the study treatment time of maximum 16 weeks calculated from width· length and depth as documented in the eCRF. Data show mean (SD) and median (IQR) as well the number (N) of values analyzed for the PP population (number (N) of values substituted by the last observation carried forward (LOCF) method).

| Observation<br>time point | NPWT Granulation |          | NPWT Fibrin |          | NPWT Necrosis |          | SMWC Granulation |          | SMWC Fibrin |          | SMWC Necrosis |          |
|---------------------------|------------------|----------|-------------|----------|---------------|----------|------------------|----------|-------------|----------|---------------|----------|
|                           | eCRF             | W.H.A.T. | eCRF        | W.H.A.T. | eCRF          | W.H.A.T. |                  | eCRF     | W.H.A.T.    | eCRF     | W.H.A.T.      | eCRF     |
| Rando                     | 32 (37)          | 23 (26)  | 18 (27)     | 68 (27)  | 2 (7)         | 9 (15)   | 38 (38)          | 26 (27)  | 21 (29)     | 67 (29)  | 1 (7)         | 7 (15)   |
|                           | 10 (68)          | 13 (37)  | 3 (28)      | 69 (45)  | 0 (0)         | 0 (15)   | 25 (80)          | 16 (42)  | 10 (33)     | 77 (56)  | 0 (0)         | 0 (8)    |
|                           | 44 (1)           | 41 (2)   | 44 (1)      | 41 (2)   | 44 (1)        | 41 (2)   | 110 (0)          | 102 (9)  | 110 (0)     | 102 (9)  | 108 (2)       | 102 (9)  |
| Week 1                    | 72 (37)          | 22 (26)  | 7 (13)      | 70 (28)  | 2 (7)         | 9 (15)   | 54 (35)          | 24 (27)  | 22 (24)     | 72 (27)  | 5 (14)        | 5 (9)    |
|                           | 90 (50)          | 9 (41)   | 0 (10)      | 75 (50)  | 0 (0)         | 0 (11)   | 63 (70)          | 13 (42)  | 13 (28)     | 78 (42)  | 0 (1)         | 0 (6)    |
|                           | 44 (5)           | 41 (8)   | 44 (6)      | 41 (8)   | 44 (7)        | 41 (8)   | 110 (16)         | 102 (27) | 110 (16)    | 102 (27) | 108 (19)      | 102 (27) |
| Week 3                    | 77 (32)          | 16 (24)  | 11 (19)     | 79 (26)  | 1 (4)         | 6 (14)   | 61 (31)          | 24 (27)  | 25 (25)     | 75 (26)  | 4 (11)        | 3 (7)    |
|                           | 93 (34)          | 2 (29)   | 0 (20)      | 91 (37)  | 0 (0)         | 0 (1)    | 70 (50)          | 15 (42)  | 20 (35)     | 83 (41)  | 0 (0)         | 0 (1)    |
|                           | 44 (6)           | 41 (9)   | 44 (7)      | 41 (9)   | 44 (7)        | 41 (9)   | 110 (9)          | 102 (26) | 110 (10)    | 102 (26) | 108 (13)      | 102 (26) |
| Week 5                    | 82 (29)          | 10 (16)  | 9 (19)      | 87 (17)  | 1 (4)         | 3 (9)    | 65 (29)          | 19 (27)  | 24 (24)     | 78 (27)  | 3 (9)         | 3 (11)   |
|                           | 95 (20)          | 4 (11)   | 2 (10)      | 93 (21)  | 0 (0)         | 0 (1)    | 73 (46)          | 4 (34)   | 13 (37)     | 93 (35)  | 0 (0)         | 0 (0)    |
|                           | 44 (7)           | 41 (16)  | 44 (8)      | 41 (16)  | 44 (9)        | 41 (16)  | 110 (19)         | 102 (27) | 110 (22)    | 102 (27) | 108 (22)      | 102 (27) |
| Week 8                    | 85 (27)          | 15 (25)  | 6 (13)      | 82 (26)  | 2 (6)         | 3 (8)    | 74 (27)          | 20 (26)  | 18(21)      | 77 (27)  | 3 (10)        | 3 (12)   |
|                           | 100 (20)         | 1 (16)   | 0 (5)       | 96 (35)  | 0 (0)         | 0 (0)    | 80 (31)          | 3 (38)   | 10 (18)     | 91 (43)  | 0 (0)         | 0 (0)    |
|                           | 44 (9)           | 41 (16)  | 44 (10)     | 41 (16)  | 44 (9)        | 41 (16)  | 110 (18)         | 102 (30) | 110 (21)    | 102 (30) | 108 (25)      | 102 (30) |
| Week 12                   | 86 (26)          | 13 (24)  | 6 (14)      | 85 (26)  | 2 (9)         | 2 (6)    | 77 (27)          | 18 (25)  | 16 (20)     | 80 (25)  | 3 (11)        | 2 (6)    |
|                           | 100 (18)         | 1 (13)   | 0 (4)       | 99 (20)  | 0 (0)         | 0 (0)    | 85 (29)          | 3 (36)   | 10 (20)     | 92 (36)  | 0 (0)         | 0 (0)    |
|                           | 44 (26)          | 41 (34)  | 44 (26)     | 41 (32)  | 44 (28)       | 41 (32)  | 110 (72)         | 101 (78) | 110 (73)    | 102 (79) | 108 (73)      | 102 (80) |
| Week 16                   | 87 (25)          | 12 (22)  | 6 (14)      | 86 (24)  | 0-1 (1)       | 1 (6)    | 80 (30)          | 19 (25)  | 14 (24)     | 80 (26)  | 2 (11)        | 1 (5)    |
|                           | 100 (15)         | 0 (14)   | 0 (1)       | 100 (20) | 0 (0)         | 0 (0)    | 95 (20)          | 5 (36)   | 0 (20)      | 92 (36)  | 0 (0)         | 0 (0)    |
|                           | 44 (14)          | 41 (25)  | 44 (16)     | 41 (25)  | 44 (15)       | 41 (25)  | 110 (18)         | 102 (42) | 110 (21)    | 102 (42) | 108 (24)      | 102 (42) |

1  
2  
3  
4  
5  
6  
7  
8  
9  
10  
11  
12  
13  
14  
15  
16  
17  
18  
19  
20  
21  
22  
23  
24  
25  
26  
27  
28  
29  
30  
31  
32  
33  
34  
35  
36  
37  
38  
39  
40  
41  
42  
43  
44  
45  
46

Table S20: Change of Wound tissue (granulation, fibrin, necrosis) at each observation time point during the study treatment time of maximum 16 weeks separately shown for the data documented in the eCRF and for the data derived from the photo analysis using the wound healing analyzing too (W.H.A.T.). Data show mean (SD) and median (IQR) as well the number (N) of values analyzed for the PP population (number (N) of values substituted by the last observation carried forward (LOCF) method).

For peer review only



| Observation time point | Pain Total<br>N=344             | Pain NPWT<br>N=171               |
|------------------------|---------------------------------|----------------------------------|
| Screening              | 1.3 (2.1)<br>0 (2)<br>N=44 (0)  | 1.8 (2.3)<br>1 (3)<br>N=110 (0)  |
| Week 1                 | 0.7 (1.5)<br>0 (1)<br>N=44 (0)  | 1.4 (2.1)<br>0 (3)<br>N=110 (5)  |
| Week 3                 | 0.4 (0.7)<br>0 (1)<br>N=44 (4)  | 1.3 (1.8)<br>0 (2)<br>N=110 (3)  |
| Week 5                 | 0.3 (0.8)<br>0 (0)<br>N=44 (2)  | 1.0 (1.6)<br>0 (2)<br>N=110 (5)  |
| Week 8                 | 0.4 (1.1)<br>0 (0)<br>N=44 (4)  | 0.9 (1.5)<br>0 (2)<br>N=110 (9)  |
| Week 12                | 0.3 (1.0)<br>0 (0)<br>N=44 (11) | 0.7 (1.3)<br>0 (1)<br>N=110 (18) |
| Week 16                | 0.2 (0.7)<br>0 (0)<br>N=44 (14) | 0.5 (1.2)<br>0 (0)<br>N=110 (13) |

Table S16: Pain evaluation at the pre-defined observation time points during the active study treatment time of 16 weeks in the PP population. Data show mean (SD) and median (IQR) as well the number (N) of values analyzed for the PP population (number (N) of values substituted by the last observation carried forward (LOCF) method).

| Observation time point              | EQ5D NPWT                              | EQ5D SMWC                               |
|-------------------------------------|----------------------------------------|-----------------------------------------|
| Screening                           | 0.61 (0.23)<br>0.63 (0.24)<br>N=42 (1) | 0.60 (0.20)<br>0.59 (0.25)<br>N=100 (3) |
| End of therapy                      | 0.65 (0.20)<br>0.78 (0.20)<br>N=26 (2) | 0.81 (0.14)<br>0.87 (0.26)<br>N=8 (0)   |
| End of maximum study treatment time | 0.65 (0.25)                            | 0.66 (0.21)                             |

|                          |             |             |
|--------------------------|-------------|-------------|
|                          | 0.66 (0.43) | 0.63 (0.28) |
|                          | N=19 (0)    | N=73 (2)    |
| Follow up after 6 months | 0.75 (0.22) | 0.70 (0.23) |
|                          | 0.78 (0.30) | 0.77 (0.34) |
|                          | N=26 (0)    | N=73 (2)    |

Table S17: Quality of life evaluated with the EQ5D instrument at the pre-defined observation time points during the active study treatment time of 16 weeks in the PP population. Data show mean (SD) and median (IQR) as well the number (N) of values analyzed for the PP population (number (N) of values substituted by the last observation carried forward (LOCF) method).

For peer review only

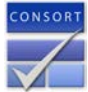

## CONSORT 2010 checklist of information to include when reporting a randomised trial\*

| Section/Topic                    | Item No | Checklist item                                                                                                                                                                              | Reported on page No |
|----------------------------------|---------|---------------------------------------------------------------------------------------------------------------------------------------------------------------------------------------------|---------------------|
| <b>Title and abstract</b>        |         |                                                                                                                                                                                             |                     |
|                                  | 1a      | Identification as a randomised trial in the title                                                                                                                                           | 1                   |
|                                  | 1b      | Structured summary of trial design, methods, results, and conclusions (for specific guidance see CONSORT for abstracts)                                                                     | 2                   |
| <b>Introduction</b>              |         |                                                                                                                                                                                             |                     |
| Background and objectives        | 2a      | Scientific background and explanation of rationale                                                                                                                                          | 3-5                 |
|                                  | 2b      | Specific objectives or hypotheses                                                                                                                                                           | 6                   |
| <b>Methods</b>                   |         |                                                                                                                                                                                             |                     |
| Trial design                     | 3a      | Description of trial design (such as parallel, factorial) including allocation ratio                                                                                                        | 6                   |
|                                  | 3b      | Important changes to methods after trial commencement (such as eligibility criteria), with reasons                                                                                          | 6,8,9               |
| Participants                     | 4a      | Eligibility criteria for participants                                                                                                                                                       | 6,7                 |
|                                  | 4b      | Settings and locations where the data were collected                                                                                                                                        | 6                   |
| Interventions                    | 5       | The interventions for each group with sufficient details to allow replication, including how and when they were actually administered                                                       | 7,8                 |
| Outcomes                         | 6a      | Completely defined pre-specified primary and secondary outcome measures, including how and when they were assessed                                                                          | 8,9                 |
|                                  | 6b      | Any changes to trial outcomes after the trial commenced, with reasons                                                                                                                       | n.a.                |
| Sample size                      | 7a      | How sample size was determined                                                                                                                                                              | 9,10                |
|                                  | 7b      | When applicable, explanation of any interim analyses and stopping guidelines                                                                                                                | n.a.                |
| <b>Randomisation:</b>            |         |                                                                                                                                                                                             |                     |
| Sequence generation              | 8a      | Method used to generate the random allocation sequence                                                                                                                                      | 7                   |
|                                  | 8b      | Type of randomisation; details of any restriction (such as blocking and block size)                                                                                                         | 7                   |
| Allocation concealment mechanism | 9       | Mechanism used to implement the random allocation sequence (such as sequentially numbered containers), describing any steps taken to conceal the sequence until interventions were assigned | 7                   |
| Implementation                   | 10      | Who generated the random allocation sequence, who enrolled participants, and who assigned participants to interventions                                                                     | 7                   |
| Blinding                         | 11a     | If done, who was blinded after assignment to interventions (for example, participants, care providers, those                                                                                | 7                   |

|    |                          |                                                             |                                                                                                                  |
|----|--------------------------|-------------------------------------------------------------|------------------------------------------------------------------------------------------------------------------|
| 1  |                          | assessing outcomes) and how                                 |                                                                                                                  |
| 2  | 11b                      | If relevant, description of the similarity of interventions | n.a.                                                                                                             |
| 3  | Statistical methods      | 12a                                                         | Statistical methods used to compare groups for primary and secondary outcomes                                    |
| 4  |                          | 12b                                                         | Methods for additional analyses, such as subgroup analyses and adjusted analyses                                 |
| 5  |                          |                                                             |                                                                                                                  |
| 6  | <b>Results</b>           |                                                             |                                                                                                                  |
| 7  | Participant flow (a      | 13a                                                         | For each group, the numbers of participants who were randomly assigned, received intended treatment, and         |
| 8  | diagram is strongly      |                                                             | were analysed for the primary outcome                                                                            |
| 9  | recommended)             | 13b                                                         | For each group, losses and exclusions after randomisation, together with reasons                                 |
| 10 | Recruitment              | 14a                                                         | Dates defining the periods of recruitment and follow-up                                                          |
| 11 |                          | 14b                                                         | Why the trial ended or was stopped                                                                               |
| 12 | Baseline data            | 15                                                          | A table showing baseline demographic and clinical characteristics for each group                                 |
| 13 |                          |                                                             |                                                                                                                  |
| 14 |                          |                                                             |                                                                                                                  |
| 15 |                          |                                                             |                                                                                                                  |
| 16 | Numbers analysed         | 16                                                          | For each group, number of participants (denominator) included in each analysis and whether the analysis was      |
| 17 |                          |                                                             | by original assigned groups                                                                                      |
| 18 | Outcomes and             | 17a                                                         | For each primary and secondary outcome, results for each group, and the estimated effect size and its            |
| 19 | estimation               |                                                             | precision (such as 95% confidence interval)                                                                      |
| 20 |                          | 17b                                                         | For binary outcomes, presentation of both absolute and relative effect sizes is recommended                      |
| 21 | Ancillary analyses       | 18                                                          | Results of any other analyses performed, including subgroup analyses and adjusted analyses, distinguishing       |
| 22 |                          |                                                             | pre-specified from exploratory                                                                                   |
| 23 |                          |                                                             |                                                                                                                  |
| 24 |                          |                                                             |                                                                                                                  |
| 25 | Harms                    | 19                                                          | All important harms or unintended effects in each group (for specific guidance see CONSORT for harms)            |
| 26 |                          |                                                             |                                                                                                                  |
| 27 | <b>Discussion</b>        |                                                             |                                                                                                                  |
| 28 | Limitations              | 20                                                          | Trial limitations, addressing sources of potential bias, imprecision, and, if relevant, multiplicity of analyses |
| 29 | Generalisability         | 21                                                          | Generalisability (external validity, applicability) of the trial findings                                        |
| 30 | Interpretation           | 22                                                          | Interpretation consistent with results, balancing benefits and harms, and considering other relevant evidence    |
| 31 |                          |                                                             |                                                                                                                  |
| 32 | <b>Other information</b> |                                                             |                                                                                                                  |
| 33 | Registration             | 23                                                          | Registration number and name of trial registry                                                                   |
| 34 | Protocol                 | 24                                                          | Where the full trial protocol can be accessed, if available                                                      |
| 35 | Funding                  | 25                                                          | Sources of funding and other support (such as supply of drugs), role of funders                                  |
| 36 |                          |                                                             |                                                                                                                  |

37  
38  
39 \*We strongly recommend reading this statement in conjunction with the CONSORT 2010 Explanation and Elaboration for important clarifications on all the items. If relevant, we also  
40 recommend reading CONSORT extensions for cluster randomised trials, non-inferiority and equivalence trials, non-pharmacological treatments, herbal interventions, and pragmatic trials.  
41 Additional extensions are forthcoming: for those and for up to date references relevant to this checklist, see [www.consort-statement.org](http://www.consort-statement.org).

# BMJ Open

## Negative Pressure Wound Therapy compared with standard moist wound care on diabetic foot ulcers in real-life clinical practice – Results of the German DiaFu-RCT

|                                 |                                                                                                                                                                                                                                                                                                                                                                                                                                                                                                                                                                                                                                                                                                                                                                                                                                                                                                                                                                                                                                                                                     |
|---------------------------------|-------------------------------------------------------------------------------------------------------------------------------------------------------------------------------------------------------------------------------------------------------------------------------------------------------------------------------------------------------------------------------------------------------------------------------------------------------------------------------------------------------------------------------------------------------------------------------------------------------------------------------------------------------------------------------------------------------------------------------------------------------------------------------------------------------------------------------------------------------------------------------------------------------------------------------------------------------------------------------------------------------------------------------------------------------------------------------------|
| Journal:                        | <i>BMJ Open</i>                                                                                                                                                                                                                                                                                                                                                                                                                                                                                                                                                                                                                                                                                                                                                                                                                                                                                                                                                                                                                                                                     |
| Manuscript ID                   | bmjopen-2018-026345.R2                                                                                                                                                                                                                                                                                                                                                                                                                                                                                                                                                                                                                                                                                                                                                                                                                                                                                                                                                                                                                                                              |
| Article Type:                   | Original research                                                                                                                                                                                                                                                                                                                                                                                                                                                                                                                                                                                                                                                                                                                                                                                                                                                                                                                                                                                                                                                                   |
| Date Submitted by the Author:   | 07-Nov-2019                                                                                                                                                                                                                                                                                                                                                                                                                                                                                                                                                                                                                                                                                                                                                                                                                                                                                                                                                                                                                                                                         |
| Complete List of Authors:       | Seidel, Dörthe; Universität Witten/Herdecke, Institut für Forschung in der Operativen Medizin (IFOM)<br>Storck, Martin; Städtisches Klinikum Karlsruhe gGmbH, Klinik für Gefäß- und Thoraxchirurgie<br>Lawall, Holger; Praxis für Herz-Kreislaufkrankungen; Max-Grundig Klinik<br>Wozniak, Gernold; Knappschaftskrankenhaus Bottrop GmbH, Gefäßchirurgische Klinik<br>Mauckner, Peter; St. Remigius Krankenhaus Opladen, Innere Medizin<br>Hochlenert, Dirk; Gemeinschaftspraxis Schlotmann-Hochlenert-Zavaleta-Haberstock<br>Wetzel-Roth, Walter; Chirurgische Praxis Wetzel-Roth<br>Sondern, Klemens; Marien Hospital Dortmund-Hombruch, Klinik für Innere Medizin/Diabetologie<br>Hahn, Matthias; Helfenstein Klinik, Allgemein- und Viszeralchirurgie<br>Rothenaicher, Gerhard; Chirurgische Praxis Rothenaicher<br>Krönert, Thomas; Thüringen-Kliniken "Georgius Agricola" GmbH, Klinik für Gefäßchirurgie<br>Zink, Karl; Diabetes Klinik<br>Neugebauer, Edmund; Universität Witten/Herdecke Department für Humanmedizin; Medizinische Hochschule Brandenburg -Theodor Fontane |
| <b>Primary Subject Heading</b>: | Diabetes and endocrinology                                                                                                                                                                                                                                                                                                                                                                                                                                                                                                                                                                                                                                                                                                                                                                                                                                                                                                                                                                                                                                                          |
| Secondary Subject Heading:      | Surgery, Evidence based practice, Dermatology                                                                                                                                                                                                                                                                                                                                                                                                                                                                                                                                                                                                                                                                                                                                                                                                                                                                                                                                                                                                                                       |
| Keywords:                       | negative pressure wound therapy, wound healing, benefit assessment, wound treatment, Diabetic foot < DIABETES & ENDOCRINOLOGY, wound care                                                                                                                                                                                                                                                                                                                                                                                                                                                                                                                                                                                                                                                                                                                                                                                                                                                                                                                                           |
|                                 |                                                                                                                                                                                                                                                                                                                                                                                                                                                                                                                                                                                                                                                                                                                                                                                                                                                                                                                                                                                                                                                                                     |

SCHOLARONE™  
Manuscripts



I, the Submitting Author has the right to grant and does grant on behalf of all authors of the Work (as defined in the below author licence), an exclusive licence and/or a non-exclusive licence for contributions from authors who are: i) UK Crown employees; ii) where BMJ has agreed a CC-BY licence shall apply, and/or iii) in accordance with the terms applicable for US Federal Government officers or employees acting as part of their official duties; on a worldwide, perpetual, irrevocable, royalty-free basis to BMJ Publishing Group Ltd ("BMJ") its licensees and where the relevant Journal is co-owned by BMJ to the co-owners of the Journal, to publish the Work in this journal and any other BMJ products and to exploit all rights, as set out in our [licence](#).

The Submitting Author accepts and understands that any supply made under these terms is made by BMJ to the Submitting Author unless you are acting as an employee on behalf of your employer or a postgraduate student of an affiliated institution which is paying any applicable article publishing charge ("APC") for Open Access articles. Where the Submitting Author wishes to make the Work available on an Open Access basis (and intends to pay the relevant APC), the terms of reuse of such Open Access shall be governed by a Creative Commons licence – details of these licences and which [Creative Commons](#) licence will apply to this Work are set out in our licence referred to above.

Other than as permitted in any relevant BMJ Author's Self Archiving Policies, I confirm this Work has not been accepted for publication elsewhere, is not being considered for publication elsewhere and does not duplicate material already published. I confirm all authors consent to publication of this Work and authorise the granting of this licence.

1  
2  
3 1 **Negative Pressure Wound Therapy compared with standard moist wound care on**  
4 **diabetic foot ulcers in real-life clinical practice – Results of the German DiaFu-RCT**

5 2  
6 3  
7  
8 4 Dörthe Seidel, Martin Storck, Holger Lawall, Gernold Wozniak, Peter Mauckner, Dirk Hochlenert, Walter Wetzel-Roth,  
9 5 Klemens Sondern, Matthias Hahn, Gerhard Rothenaicher, Thomas Krönert, Karl Zink, Edmund Neugebauer

10 6  
11 7 Institut für Forschung in der Operativen Medizin (IFOM), University of Witten/Herdecke, Köln, Germany (D Seidel MD),  
12 8 Doerthe.Seidel@uni-wh.de

13 9 Klinik für Gefäß- und Thoraxchirurgie, Städtisches Klinikum Karlsruhe, Karlsruhe, Germany (Prof M Storck MD),  
14 10 Martin.Storck@klinikum-karlsruhe.de

15 11 Praxis für Herz-Kreislaufkrankungen, Ettlingen und Max-Grundig Klinik Bühlerhöhe, Germany (Dr med H Lawall MD),  
16 12 holger.lawall@gmail.com

17 13 Gefäßchirurgische Klinik, Knappschaftskrankenhaus, Bottrop, Germany (Prof G Wozniak MD), gernold.wozniak@kk-  
18 14 bottrop.de

19 15 Innere Medizin, St. Remigius Krankenhaus Opladen, Leverkusen, Germany (Dr med P Mauckner MD), peter-  
20 16 mauckner@live.de

21 17 Gemeinschaftspraxis Schlotmann-Hochlenert-Zavaleta-Haberstock, Köln, Germany (Dr med D Hochlenert MD),  
22 18 dirk.hochlenert@web.de

23 19 Chirurgische Praxis Wetzel-Roth, Buchloe, Germany (Dr med W Wetzel-Roth MD), info@wetzels-oth.de

24 20 Klinik für Innere Medizin/Diabetologie, Marien Hospital Dortmund-Hombruch, Dortmund, Germany (Dr med Sondern MD),  
25 21 klemens.sondern@marien-hospital-dortmund.de

26 22 Allgemein- und Viszeralchirurgie, Helfenstein Klinik, Geisslingen, Germany (Dr med M Hahn, MD), matthias.hahn@af-k.de

27 23 Chirurgische Praxis Rothenaicher, München, Germany (G Rothenaicher MD), rothenaicher@arcor.de

28 24 Klinik für Gefäßchirurgie, Thüringen-Kliniken "Georgius Agricola" GmbH, Saalfeld, Germany (Dr med T Krönert MD),  
29 25 tkroenert@thueringen-kliniken.de

30 26 Diabetes Klinik, Bad Mergentheim, Germany (Dr med K Zink MD), zink@diabetes-zentrum.de

31 27 University of Witten/Herdecke, Köln, Germany (Prof E Neugebauer), Edmund.Neugebauer@uni-wh.de

32 28

33 29 **Correspondence to:**

34 30 Dörthe Seidel\*

35 31 Institut für Forschung in der Operativen Medizin (IFOM)

36 32 University of Witten/Herdecke

37 33 Ostmerheimerstraße 200 Haus 38

38 34 Köln (Cologne)

39 35 51109 Germany

40 36 [Doerthe.Seidel@uni-wh.de](mailto:Doerthe.Seidel@uni-wh.de)

1  
2  
3 **37 Abstract**

4  
5 **38 Objectives**

6  
7 39 The aim of the DiaFu-study was to evaluate effectiveness and safety of negative pressure wound therapy (NPWT)  
8 40 in patients with diabetic foot wounds in clinical practice.

9  
10 **41 Design**

11  
12 42 In this controlled clinical superiority trial with blinded outcome assessment patients were randomized in a 1:1 ratio  
13 43 stratified by study site and ulcer severity grade using a web-based-tool.

14  
15 **44 Setting**

16  
17 45 This German-national study was conducted in 40 surgical and internal medicine in- and outpatient facilities  
18 46 specialized in diabetes foot care.

19  
20 **47 Participants**

21  
22 48 368 patients were randomized and 345 participants were included in the modified ITT population. Adult patients  
23 49 suffering from a diabetic foot ulcer at least for 4 weeks and without contraindication for NPWT were allowed to  
24 50 be included.

25  
26 **51 Interventions**

27  
28 52 NPWT was compared with standard moist wound care (SMWC) according to local standards and guidelines.

29  
30 **53 Primary and secondary outcome measures**

31  
32 54 Primary endpoints were wound closure rate and time to closure within 16 weeks. Secondary endpoints were  
33 55 wound- and treatment-related adverse events (AEs), amputations, time until optimal wound bed preparation,  
34 56 wound size and wound tissue composition, pain, and quality of life within 16 weeks, and recurrences and wound  
35 57 closure rate within 6 months.

36  
37 **58 Results**

38  
39 59 In the ITT population 25 patients in the NPWT-arm (14·6%) and 21 patients in the SMWC-arm (12·1%) achieved  
40 60 wound closure ( $p=0\cdot53$ ). Wound closure time was not significantly different between the treatment arms ( $p=0\cdot24$ ).  
41 61 96 patients in the NPWT-arm and 72 patients in the SMWC-arm had at least one AE ( $p=0\cdot007$ ), but only 11 AEs  
42 62 have been possibly related to NPWT. Documentation deficiencies, premature cessation of NPWT and temporary  
43 63 changes of the randomized treatment negatively impacted the outcome wound closure.

44  
45 **64 Conclusions**

46  
47 65 NPWT was not superior to SMWC in diabetic foot wounds in clinical practice. Overall wound closure rate was  
48 66 low. Deviations from guidelines limit the treatment success.

49  
50 **67 Trial registration**

51  
52 68 Clinical Trials.gov: NCT01480362

53  
54 **70 Strengths and limitations of this study**



- 1  
2  
3 71 • The DiaFu study included patients with diabetic foot ulcers both with peripheral neuropathy and  
4  
5 72 peripheral arterial occlusive disease, which corresponds to the typical mixed patient population in real-  
6  
7 73 life clinical practice and enables a general statement about effectiveness and safety of NPWT in the typical  
8  
9 74 medical care situation.
- 10  
11 75 • The study does not provide any information on the effectiveness of NPWT in specific patient groups,  
12  
13 76 which was not intended and may be seen as a limitation.
- 14  
15 77 • In this health services research study hospitals and outpatient facilities were selected by means of a  
16  
17 78 qualification checklist and clinical investigators were obliged to provide patients with the best clinical  
18  
19 79 practice in compliance with all relevant guidelines, but there was no active monitoring of the  
20  
21 80 implementation of these guidelines.
- 22  
23 81 • To ensure the best quality of local wound treatment and to achieve optimal baseline conditions, the study  
24  
25 82 sites were trained for both NPWT and SMWC, but treatment application was at the discretion of the  
26  
27 83 clinical investigators.
- 28  
29 84 • Methods against bias were applied whenever possible, but due to the nature of the compared treatment  
30  
31 85 methods, a direct blinding of patients and clinical investigators was not possible and blinded outcome  
32  
33 86 assessment could only be implemented for the endpoints wound closure and wound size development  
34  
35 87 over time by means of wound photographs.
- 36  
37 88

### 89 **Background**

90 More than 400 million people worldwide suffer from diabetes [1, 2] and about 15% of all these patients will  
91  
92 develop a diabetic foot ulcer (DFU) during their lifetime [3, 4]. Approximately 50-70% of all lower limb  
93  
94 amputations are due to diabetes [4]. DFUs represent complex chronic wounds with a major impact on patients`  
95  
96 morbidity, mortality and quality of life. Beside an optimal diabetes and infection control, pressure relieving  
97  
98 strategies and restoring pulsatile blood flow, effective local wound care is part of the holistic approach necessary  
99  
100 to optimally treat patients with DFUs. Only a few modern moist wound dressings and topical agents have been  
convincingly shown to achieve higher wound closure rates compared with traditional wet gauze dressings in  
patients with diabetic foot wounds [5]. Also, for other ulcer types there is an uncertainty which dressings and  
topical agents are most effective for treatment [6]. Negative pressure wound therapy (NPWT) is an innovative  
treatment option and one of the most commonly used and well-established technologies with the aim to promote  
wound healing [7]. The first use of vacuum sealing was described in 1993 by Fleischmann et al. [8] and the

1  
2  
3 101 commercially available product was developed later in the 1990s [9, 10]. Positive effects of NPWT on wound  
4  
5 102 healing have been suggested in various basic studies [10, 11]. At the time of planning the DiaFu-study, the clinical  
6  
7 103 evidence largely consisted of clinician perception, case reports and series, small cohort studies, and weakly-  
8  
9 104 powered or low-quality randomized trials that documented broad use of NPWT in various clinical settings and  
10  
11 105 constituted a substantial number of publications but an overall small amount of evidence [12-15]. Two randomized  
12  
13 106 controlled trials (RCTs) performed by Armstrong 2005 [16] and Blume 2008 [17] provided a solid basis for  
14  
15 107 planning a study.

16 108 In the recent years, a specific review for the use of NPWT in diabetic foot wounds performed by Dumville et al in  
17  
18 109 2013 [18], an assessment in the home setting by Rhee et al. in 2014 [19] and a health technology assessment  
19  
20 110 particularly issued for the evaluation of NPWT for managing diabetic foot ulcers [20] in 2014, as well as the most  
21  
22 111 recent work of Liu et al in 2017 [21, 22] all concluded that although NPWT may have a positive effect, the trials  
23  
24 112 that have been performed have methodological flaws and sufficient, unbiased evidence of whether wounds heal  
25  
26 113 better or worse with NPWT than with conventional treatment is still missing.

27  
28 114 In Germany, the issue of evidence for efficacy and safety of NPWT in acute and chronic wounds was first  
29  
30 115 addressed in 2002 when the German Federal Joint Committee (German: Gemeinsamer Bundesausschuss [G-BA])  
31  
32 116 needed to decide whether NPWT could be reimbursed without restrictions in outpatient care.

33  
34 117 Finally, in 2007 taking into account all available evidence the G-BA decided that the benefits of the treatment  
35  
36 118 method NPWT should be evaluated in a so-called model project. This included the conduct of clinical studies for  
37  
38 119 which the G-BA defined basic requirements. This essentially concerned the formulation of a study hypothesis that  
39  
40 120 supports G-BA's overall question if NPWT can be reimbursed in German outpatient care without any limitation;  
41  
42 121 the selection of a comparator that represents the current treatment standard in Germany; and implementation of all  
43  
44 122 measures to ensure a sufficient certainty of the results.

45 123 Following the announcement of the G-BA, the German statutory health insurance funds initiated an overall project  
46  
47 124 through a European tender. The DFU has been chosen to be the representative for chronic wounds in a RCT  
48  
49 125 comparing NPWT and standard moist wound care (SMWC) in clinical practice.

1  
2  
3 **126 Methods**  
4

5 127  
6

7 **128 Aim of the study**  
8

9 129 The aim of the DiaFu-study was to evaluate whether the effectiveness and safety of NPWT is superior to SMWC  
10 130 in German real-life clinical practice.  
11  
12

13 131

14 **132 Study Design**  
15

16 133 The DiaFu-study was a German-national, multicenter, randomized controlled clinical superiority trial with blinded  
17 134 assessment of wound closure, wound size and wound tissue qualities using photographs. This German national  
18 135 study was conducted both in hospital departments and outpatient facilities with a special qualification for diabetic  
19 136 foot care. Study treatment was allowed to be started both in in- and outpatient care and should be continued  
20 137 outpatient whenever possible. Ethical approval of the Lead Ethical Committee of the University of  
21 138 Witten/Herdecke has been fully granted without any conditions. More detailed information on the study design  
22 139 can be found in the study protocol publication that is available open access [23].  
23  
24  
25  
26  
27  
28  
29

30 140

31 **141 Patient and Public Involvement**  
32

33 142 Patients were not involved in the design, recruitment or conduct of the study. The results of this study will not be  
34 143 disseminated directly to study participants.  
35  
36

37 144

38 **145 Participants**  
39

40 146 Following a pragmatic approach with the aim to include a patient population best representing real-life clinical  
41 147 practice, in- and exclusion criteria have been selected based on manufacturers' contraindications and FDA  
42 148 warnings, the necessity to excluded patients in need of protection and who are unable to give their consent, and  
43 149 the intention to avoid general study-related influences on the results.  
44  
45  
46

47 150 Adult patients (age >18 years) with at least 4-week-old chronic diabetic foot ulcers corresponding to Wagner 2 to  
48 151 4 were screened for study participation by the local investigators. Before inclusion, the study protocol required  
49 152 either a debridement or, if necessary, an amputation of foot parts, or at least a thorough wound cleansing, depending  
50 153 on the individual needs of the patients, in order to achieve the optimal outcome of wound treatment. Thus, chronic  
51 154 diabetic foot wounds after adequate wound pretreatment as well as post-surgical amputation wounds below the  
52 155 upper ankle joint were eligible for inclusion. The initially planned minimum ulcer age of 6 weeks was reduced to  
53 156 4 weeks during the course of the study. Patients estimated to be at risk of non-compliance with study requirements,  
54  
55  
56  
57  
58  
59  
60

1  
2  
3 157 with wounds with necrotic tissue present that could not be removed by debridement or amputation, with exposed  
4  
5 158 blood vessels within or directly surrounding the wound not possible to be sufficiently covered or with an increased  
6  
7 159 risk of bleeding with hemodynamic consequences (mainly relevant for posterior tibial artery  
8  
9 160 dorsalis pedis artery), and outpatients receiving anticoagulation therapy or suffering from a high-grade impaired  
10  
11 161 clotting function with a heightened risk of bleeding with hemodynamic consequences were excluded from the  
12  
13 162 DiaFu-study. The use of NPWT devices on the study wound within six weeks prior to study start represented an  
14  
15 163 exclusion criterion in order to demonstrate a clear therapeutic effect of each treatment arm.

16  
17 164 Written informed consent was obtained from every participant after being informed about all aspects of the trial  
18  
19 165 and before randomization and any trial-related procedure. As the statutory health insurance funds provided  
20  
21 166 integrated care contracts for outpatient NPWT, it was only possible to include patients in the study who were  
22  
23 167 members of a participating health insurance fund.

24  
25 168 Basic data were collected for all patients considered for study participation during screening and have been updated  
26  
27 169 during the randomization visit. Study sites have been selected based on their qualifications and experiences using  
28  
29 170 a pre-study qualification checklist and annual quality reports of the respective institution (if available).

30 171

### 31 172 **Randomization and masking**

32  
33 173 Patients were randomly allocated to the treatment arms in a 1:1 ratio using a computer-generated list located on a  
34  
35 174 centralized web-based tool. The randomization list consisted of permuted blocks of variable length (4, 6) which  
36  
37 175 were randomly arranged. Patients were stratified by study site and by Wagner-Armstrong stage within each site  
38  
39 176 (<Wagner-Armstrong stage 2C and  $\geq$  Wagner-Armstrong stage 2C). The randomization lists were generated with  
40  
41 177 the help of a self-created Java program and integrated into the study database. Each registered investigator received  
42  
43 178 individual access to the randomization tool via the study website, but without knowledge of future treatment  
44  
45 179 assignment, which provided adequate allocation concealment. The investigators were responsible for adequately  
46  
47 180 implementing the assigned therapy. Due to the physical differences between the treatment regimens it was not  
48  
49 181 possible to blind either participant or physician to the treatment assignment. Verification of complete wound  
50  
51 182 closure was performed by independent, blinded assessment of wound photographs. Determination of wound size  
52  
53 183 and percentage wound tissue quality was also performed by central, blinded outcome assessors based on the wound  
54  
55 184 photographs using the Wound Healing Analyzing Tool (W.H.A.T.). The determination of sufficient wound bed  
56  
57 185 conditioning and the indication for surgical closure was carried out by the treating physician, as in clinical practice.  
58  
59 186 The treating physician was not blinded to treatment allocation.

60 187

## 188 **Procedures**

189 Before randomization and start of study treatment all patients underwent one or more of the following no longer  
190 than six hours before randomization: amputation, debridement or thorough wound cleansing. Patients received an  
191 extensive examination of overall health status, specific diabetes associated disorders, and relevant influence factors  
192 on wound healing during screening with an update at the randomization visit. Pedal perfusion was assessed by  
193 Ankle Brachial Index (ABI), ankle and pedal Doppler arterial waveforms, and either toe systolic pressure or  
194 transcutaneous oxygen pressure (TcPO<sub>2</sub>). Infection diagnosis followed the approach involving clinical evaluation  
195 and laboratory testing, and in case of suspected diabetic foot osteomyelitis (DFO) a probe to bone test and a  
196 stepwise approach to imaging modalities in order to confirm and to determine the best treatment regimen for the  
197 study participants. Study therapy was allowed to be started either in-hospital or as outpatient and was intended to  
198 be continued in outpatient care whenever possible.

199 In the intervention arm commercially available CE-marked NPWT devices of the manufacturers Kinetic Concepts  
200 Incorporated (KCI) and Smith & Nephew were used in the discretion of the clinical investigator according to  
201 clinical routine and manufacturer's instructions [23]. Recommendations for use can be found on the manufacturers'  
202 websites. As part of the European tender for the overall project, the German statutory health insurance funds  
203 awarded lots for the provision of the medical products by the respective manufacturers. Germany was divided into  
204 4 supply areas. During the award procedure, Smith & Nephew received 1 lot and KCI 3 lots. Thus, devices and  
205 consumables of Smith & Nephew were used for the north and northern east region of Germany and for the rest of  
206 Germany the therapy systems of KCI were used. Within the study, NPWT was required to be used for wound bed  
207 preparation in order to achieve at least 95% granulation of the wound area. After optimal preparation of the wound,  
208 complete closure could be achieved either by secondary intention with dressings or by surgical closure with  
209 subsequent removal of the suture.

210 Control therapy was defined as any SMWC according to local clinical standards and guidelines [24, 25].  
211 Healthcare providers were obligated to provide patients with best practice. In the control arm it was permitted to  
212 apply any local wound treatment standard used in the respective study site that did not have an experimental status  
213 or was NPWT. To ensure the best quality of local wound treatment, the study sites were trained for both the  
214 intervention arm by the manufacturers and the control arm by the German Society for Wound Healing and Wound  
215 Treatment which provided parts of its curriculum and experienced instructors.

216 The maximum study treatment time was 16 weeks after randomization. Study visits needed to be performed at  
217 week one, three, five, 12 and 16 and included a complete wound examination. Wound closure was possible to be  
218 achieved at any time within the study treatment period of 42 days and had to be documented in a wound closure

1  
2  
3 219 visit as well as in a wound closure confirmation visit after 14 days. Study participants were followed up until 6  
4  
5 220 months after randomization. The initially planned follow-up period of 12 months was reduced to 6 months in the  
6  
7 221 course of the study. The amendment to the study protocol was endorsed by the Ethics Committee and immediately  
8  
9 222 communicated to all participating study sites.

10 223

## 11 224 **Outcomes**

12  
13  
14 225 The primary outcomes were wound closure rate and the time until complete wound closure within a maximum  
15  
16 226 study treatment period of 16 weeks. Complete wound closure was defined as 100% epithelialization of the wound,  
17  
18 227 no drainage, no suture material and no need for wound dressing or adjuvants. Wound closure needed to sustain a  
19  
20 228 minimum of 14 days after the first diagnosis and to be confirmed by independent blinded observers using wound  
21  
22 229 photographs. If wound closure was achieved by surgical methods, the endpoint was not reached until the above  
23  
24 230 criteria were met (e.g. only after removal of the suture).

25  
26 231 Secondary outcomes were wound closure rate after six months; time until optimal preparation of the wound bed  
27  
28 232 (a minimum of 95% granulation), amputations and resections, wound size and wound tissue composition, pain and  
29  
30 233 quality of life within 16 weeks; and recurrence within six months. The initial planned secondary endpoint of time  
31  
32 234 until wound closure within 6 months was abandoned during the course of the study. It was found that a time-to-  
33  
34 235 event survey was not possible outside the active study treatment period. This was mostly due to the fact that after  
35  
36 236 this 16-week period weekly study visits were no longer an obligation and further patient care was no longer bound  
37  
38 237 to the study site.

39  
40 238 Minor and major amputations were considered separately, whereas the disarticulation at the midtarsal joint  
41  
42 239 (Chopart's amputation) was considered still to be minor. Wound size and wound tissue composition (percentage  
43  
44 240 of granulation tissue, fibrin and necrosis) were monitored at each study visit. Quality of life (QoL) was measured  
45  
46 241 using the questionnaire Euro Quol 5D (EQ5D) at inclusion, end of the maximum treatment time or end of the  
47  
48 242 therapy and at the six-month follow-up visit. At each study visit participants were asked to provide their assessment  
49  
50 243 of wound-associated pain on a numerical rating scale (0 to 10). The incidence of serious adverse events (SAEs)  
51  
52 244 within six months and the incidence of device-related and wound-related adverse events occurring within 16 weeks  
53  
54 245 or until wound closure confirmation were safety endpoints of this trial.

55 246

## 56 247 **Statistical analysis**

57  
58 248 Sample size calculation was performed using the expected difference between wound closure rates in both  
59  
60 249 treatment arms based on information extracted from previously published studies by Armstrong and Lavery [16]

1  
2  
3 250 and [17]. We assumed a complete wound closure rate of 45% for NPWT and 30% in the SMWC group, resulting  
4  
5 251 in a minimum difference of 15% after a treatment time of 16 weeks. Based on a type one error of  $\alpha = 0.05$  and a  
6  
7 252 type two error of  $\beta = 0.2$  (corresponding to a power of 80%) a total sample size of 162 patients per group was  
8  
9 253 calculated. The computer program of Dupont and Plummer was used for sample size calculation [26].

10 254 We performed all analyses based on a modified intention-to-treat (ITT) population that includes all randomized  
11  
12 255 participants who have a valid baseline and at least one valid post baseline wound assessment. As a secondary  
13  
14 256 approach a per-protocol (PP) analysis has been performed excluding patients with any serious protocol deviations,  
15  
16 257 temporary changes from SMWC to NPWT, permanent wound treatment changes or without valid documentation  
17  
18 258 until wound closure confirmation or end of maximum treatment time (EOMT). Safety data are presented on an 'as  
19  
20 259 treated' basis. Subgroup analysis is presented for small vs big wound subpopulations. There was no interim  
21  
22 260 analysis.

23  
24 261 The superiority hypothesis was tested in parallel for wound closure rate and time to wound closure within 16 weeks.  
25  
26 262 Incidence of complete wound closure was analyzed using a chi-squared test (Fisher's exact test) comparing the  
27  
28 263 two treatment arms. Time to complete wound closure was compared between the two treatment arms using a log-  
29  
30 264 rank test. The method of Bonferroni-Holm was used for adjustment of the  $\alpha$ -error for parallel confirmatory testing  
31  
32 265 of both primary endpoints. Missing values have been incorporated as censored values.

33  
34 266 During study planning, the following concomitant diseases and therapeutic measures with a possible influence on  
35  
36 267 the primary study outcome wound closure (confounders) were identified: presence of neuropathy (sensation loss  
37  
38 268 according to the PEDIS classification system [27]); presence of diabetic neuropathic osteoarthropathy (DNOAP)  
39  
40 269 (anatomical classification according to Sanders [28] and progression stages according to Levin [29]  
41  
42 270 ), Wagner [30] grading of the ulcer; presence of peripheral arterial occlusive disease (Rutherford classification for  
43  
44 271 chronic limb ischemia [31]), chronic venous insufficiency (CVI) (Widmer I-III [32]), presence of extreme foot  
45  
46 272 deformities and malpositions of toes, foot or the entire limb; untreated or therapy-refractory inflammation in the  
47  
48 273 wound area; chronic anemia; heel necrosis; presence of a lymphedema; infection; heightened glycated hemoglobin  
49  
50 274 (HbA1c) level; dialysis; application of hyperbaric oxygen (HBO) or normothermal therapy, application of  
51  
52 275 recombinant or autologous growth factors to the study wound, and application of skin or dermal substitutes and  
53  
54 276 with living cells that produce growth factors. These covariates thought to influence wound closure were analyzed  
55  
56 277 for their effect on the two primary endpoints. Covariates were excluded from the analysis if the number of missing  
57  
58 278 values was too high. First, the relevant covariates were tested by means of a univariate analysis with regard to their  
59  
60 279 effect on wound closure rate and time without consideration of the treatment arms. If there was a significant  
280  
280 influence, the frequency of occurrence in the treatment arms was analyzed. Secondary, multivariate analyses were



1  
2  
3 281 performed for both primary endpoints, taking into account treatment assignment and including all relevant  
4  
5 282 covariates. The multivariate analysis of the primary endpoint wound closure rate was performed with binary  
6  
7 283 logistic regression to describe the influence of the independent covariates (regressors) on the dependent  
8  
9 284 dichotomous variable wound closure. The multivariate analysis of the primary endpoint time to wound closure  
10  
11 285 was performed using a COX regression model.

12  
13 286 Safety and secondary endpoints were analyzed using conventional univariate testing.

14  
15 287 Within a priori planned subgroup analysis the ITT population was divided into a group of small wounds and a  
16  
17 288 group of big wounds based on the wound surface area documented during the randomization visit. Wounds smaller  
18  
19 289 than or equal to the total median wound surface (483 mm<sup>2</sup>) were assigned to the subgroup "small wounds". Patients  
20  
21 290 with wound surface areas larger than the median value were assigned to the subgroup "large wounds". Since no  
22  
23 291 citable scientific definition of a large wound was available at the time of study planning and the clinical experts  
24  
25 292 involved could not make a decision, the median of all wounds was chosen as the criterion for the division into the  
26  
27 293 two subgroups. Confirmatory analysis of primary and secondary endpoints was repeated for the subgroups.

28 294 Missing values for the following outcome parameters were replaced using the Last Observation Carried Forward  
29  
30 295 (LOCF) method: wound closure rate, wound size and wound tissue quality, recurrence and amputation. The  
31  
32 296 outcome parameters time to wound closure and time until optimal preparation of the wound bed did not require  
33  
34 297 data replacement, since missing values are included in the analysis as right-censored values. If the wound closure  
35  
36 298 is not confirmed to be closed after a minimum of 14 days, the wound is considered as an unsustained wound  
37  
38 299 closure. All missing quality of life values (EQ-5D) were replaced with the overall quality of life assessment (visual  
39  
40 300 analogue scale), if available. If there was no quality of life assessment, there was no replacement. For missing  
41  
42 301 values of the demographic and baseline characteristics, which are necessary for the estimation of the regression  
43  
44 302 coefficients, no replacement was performed. IBM SPSS Statistics (version 23) was used for all analyses.

45 303 This study is registered with ClinicalTrials.gov number NCT01480362 and in the German Clinical Trial Registry,  
46  
47 304 number DRKS00003347.

48  
49 305 A data monitoring committee was formed to oversee overall study performance and safety.

50  
51 306

### 52 53 307 **Role of the funding source**

54  
55 308 Through a European tender the study was initiated by a consortium of 19 statutory German health insurance funds,  
56  
57 309 which provided integrated care contracts for all study participants and for up to 7000 patients with acute and  
58  
59 310 chronic wounds in Germany; defined basic rules for study design based on the requirements of the German  
60  
311 authorities; and provided a critical review of the study protocol and the final report. The study was funded by the



1  
2  
3 312 manufacturers Kinetic Concepts Incorporated (KCI) and Smith & Nephew (S&N). Both companies provided the  
4  
5 313 NPWT devices and associated consumable supplies in the assigned regions of Germany as well as all necessary  
6  
7 314 support and information about the used material. The manufacturers had no role in study design, data collection,  
8  
9 315 data analysis, data interpretation, or writing of the report. All authors had full access to all of the data (including  
10  
11 316 statistical reports and tables) in the study and take full responsibility for the accuracy of the data analysis.  
12  
13 317

14  
15  
16  
17  
18  
19  
20  
21  
22  
23  
24  
25  
26  
27  
28  
29  
30  
31  
32  
33  
34  
35  
36  
37  
38  
39  
40  
41  
42  
43  
44  
45  
46  
47  
48  
49  
50  
51  
52  
53  
54  
55  
56  
57  
58  
59  
60

For peer review only

318 **Results**

319 Between Dec 23, 2011 and August 12, 2014 386 patients were enrolled and randomly assigned to receive NPWT  
 320 (181) or SMWC (187) in the DiaFu-study (**Error! Reference source not found.**) in overall 40 study sites, which  
 321 recruited minimum 1 patient and maximum 76 patients. A full list of investigators can be found in the appendix.  
 322 13 clinical investigators randomized more than 10 patients. 23 study sites enrolled only between 1 and 4 patients.  
 323 Most of these study sites refused further study participation due lack of time and staff for adequately performing  
 324 the documentation. In the further course of the trial research nurses have been hired by the independent scientific  
 325 institute overseeing the trial in order to support the documentation in the study sites whenever needed.  
 326 Demographics and relevant baseline characteristics of the DFU are presented in Table 1 and the appendix. Baseline  
 327 characteristics of the patients in the NPWT-and the SMWC-arm are similar in the ITT population without any  
 328 relevant difference between the treatment arms.

329

| <b>Demographics of the study population and baseline parameters of the DFU (ITT population)</b> | <b>Total<br/>N=345 (100 %)</b> | <b>NPWT<br/>N=171 (49·6%)</b> | <b>SMWC<br/>N=174 (50·4%)</b> |
|-------------------------------------------------------------------------------------------------|--------------------------------|-------------------------------|-------------------------------|
| Male                                                                                            | 267 of 345 (77·4%)             | 133 of 171 (77·8%)            | 134 of 174 (77·0%)            |
| Female                                                                                          | 78 of 345 (22·6%)              | 38 of 171(22·2%)              | 40 of 174 (23·0%)             |
| Age (years) (N=345) Mean (SD)                                                                   | 67·8 (11·9)                    | 67·6 of 171(12·3)             | 68·1 (11·5)                   |
| Height (N=340) (in cm) Mean (SD)                                                                | 174·1 (12·4)                   | 173·4 (14·6)                  | 174·8 (9·9)                   |
| Weight (N=335) (in kg) Mean (SD)                                                                | 93·3 (22)                      | 92·7 (21·5)                   | 93·8 (22·6)                   |
| Localization of the ulcer                                                                       |                                |                               |                               |
| Regio calcanea                                                                                  | 39 (11·3%)                     | 17 (9·9%)                     | 22 (12·6%)                    |
| Dorsum pedis                                                                                    | 20 (5·8%)                      | 13 (7·6%)                     | 7 (4%)                        |
| Planta pedis                                                                                    | 56 (16·2%)                     | 30 (17·5%)                    | 26 (14·9%)                    |
| Metatarsalia                                                                                    | 147 (42·6%)                    | 73 (42·7%)                    | 74 (42·5%)                    |
| Phalanges distales                                                                              | 64 (18·6%)                     | 31 (18·1%)                    | 33 (19%)                      |
| Phalanges mediales                                                                              | 28 (8·1%)                      | 14 (8·2%)                     | 14 (8%)                       |
| Phalanges proximales                                                                            | 40 (11·6%)                     | 21 (12·3%)                    | 19 (10·9%)                    |
| Hallux                                                                                          | 42 (12·2%)                     | 24 (14%)                      | 18 (10·3%)                    |
| Digitus pedis II                                                                                | 22 (6·4%)                      | 10 (5·8%)                     | 12 (6·9%)                     |
| Digitus pedis III                                                                               | 14 (4·1%)                      | 7 (4·1%)                      | 7 (4%)                        |
| Digitus pedis IV                                                                                | 20 (5·8%)                      | 7 (4·1%)                      | 13 (7·5%)                     |
| Digitus minimus                                                                                 | 25 (7·2%)                      | 12 (7%)                       | 13 (7·5%)                     |
| Type of ulcer                                                                                   |                                |                               |                               |

|                                                        |                    |                    |                    |
|--------------------------------------------------------|--------------------|--------------------|--------------------|
| Primary ulcer                                          | 279 of 342 (80.9%) | 136 of 170 (79.5%) | 143 of 172 (82.2%) |
| Recurrence                                             | 63 of 342 (18.3%)  | 34 of 170 (19.9%)  | 29 of 172 (16.7%)  |
| Duration of ulcer (days)                               |                    |                    |                    |
| N                                                      | 335                | 168                | 167                |
| Mean (SD)                                              | 189.7 (360.2)      | 217.1 (458.1)      | 162.1 (220)        |
| Median                                                 | 83                 | 81                 | 85                 |
| Min – Max                                              | 0 – 4468           | 0 – 4468           | 0 – 1826           |
| Wound surface area at randomization (cm <sup>2</sup> ) |                    |                    |                    |
| Mean (SD)                                              | 1101 (2543)        | 1060 (1536)        | 1141 (3247)        |
| Min-Max                                                | [12 – 40773]       | [20 – 13188]       | [12 – 40773]       |

330 Table 1: The table shows patient demographics and baseline characteristics of the ITT- population. Data are Number (N) and  
 331 Percentage (%), Mean and Standard Deviation (SD), and Minimum – Maximum [Min – Max]. “N=” is stating the number of  
 332 patients with actual available information. Findings, diagnoses and procedures documented by the investigators are  
 333 presented.

334  
 335 The baseline of the identified factors possibly influencing wound closure is shown in Table 2.

336

| <b>Confounders at baseline<br/>(ITT population)</b>                                  | <b>Total<br/>N=345 (100 %)</b> | <b>NPWT<br/>N=171 (49.6%)</b> | <b>SMWC<br/>N=174 (50.4%)</b> |
|--------------------------------------------------------------------------------------|--------------------------------|-------------------------------|-------------------------------|
| Presence of neuropathy (sensation loss according to the PEDIS classification system) | 250 of 334 (72.5%)             | 125 of 166 (73.1%)            | 125 of 168 (71.8%)            |
| Presence of a diabetic neuropathic osteoarthropathy (DNOAP)                          | 61 (17.7%)                     | 30 (17.5%)                    | 31 (17.8%)                    |
| Wagner grading of the ulcer                                                          |                                |                               |                               |
| 1 - Superficial ulcer of skin or subcutaneous tissue                                 | 6 (1.7%)<br>225 (65.2%)        | 2 (1.2%)<br>110 (64.3%)       | 4 (2.3%)<br>115 (66.1%)       |
| 2 - Ulcers extend into tendon, bone, or capsule                                      | 85 (24.6%)                     | 45 (26.3%)                    | 40 (23%)                      |
| 3 - Deep ulcer with osteomyelitis, or abscess                                        | 26 (7.5%)                      | 13 (7.6%)                     | 13 (7.5%)                     |
| 4 - Gangrene of toes or forefoot                                                     | 3 (0.9%)                       | 1 (0.6%)                      | 2 (1.1%)                      |
| 5 - Midfoot or hindfoot gangrene                                                     |                                |                               |                               |
| Presence of peripheral arterial occlusive disease (PAOD)                             | 244 of 345 (70.7%)             | 121 of 171 (70.8%)            | 123 of 174 (70.7%)            |
| Rutherford classification for chronic limb ischemia (Grade/Category)                 |                                |                               |                               |
| 0/0 Asymptomatic—no hemodynamically significant occlusive disease                    | 20 of 244 (8.2%)               | 8 of 121 (6.6%)               | 12 of 123 (9.8%)              |
| I/1 Mild claudication                                                                | 31 of 244 (12.7%)              | 16 of 121 (13.2%)             | 15 of 123 (12.2%)             |

|                                                                                                      |                    |                    |                    |
|------------------------------------------------------------------------------------------------------|--------------------|--------------------|--------------------|
| I/2 Moderate claudication                                                                            | 20 of 244 (8·2%)   | 6 of 121 (5·0%)    | 14 of 123 (11·4%)  |
| I/3 Severe claudication                                                                              | 5 of 244 (2·0%)    | 2 of 121 (1·7%)    | 3 of 123 (2·4%)    |
| II/4 Ischemic rest pain                                                                              | 1 of 244 (0·4%)    | 1 of 121 (0·8%)    | 0 of 123 (0·0%)    |
| III/5 Minor tissue loss—non-healing ulcer· focal gangrene with diffuse pedal ischemia                | 163 of 244 (66·8%) | 87 of 121 (71·9%)  | 76 of 123 (61·8%)  |
| III/6 Major tissue loss—extending above transmetatarsal level· functional foot no longer salvageable | 4 of 244 (1·6%)    | 1 of 121 (0·8%)    | 3 of 123 (2·4%)    |
| No chronic venous insufficiency (CVI)                                                                | 259 of 302 (75·1%) | 132 of 150 (77·2%) | 127 of 152 (73%)   |
| CVI Widmer I                                                                                         | 25 of 302 (7·2%)   | 11 of 150 (6·4%)   | 14 of 152 (8%)     |
| CVI Widmer II                                                                                        | 12 of 302 (3·5%)   | 3 of 150 (1·8%)    | 9 of 152 (5·2%)    |
| CVI Widmer III                                                                                       | 6 of 302 (1·7%)    | 4 of 150 (2·3%)    | 2 of 152 (1·1%)    |
| Presence of extreme foot deformities and malpositions of toes, foot or the entire limb               | 59 of 342 (17·1%)  | 26 of 170 (15·2%)  | 33 of 172 (19%)    |
| Untreated or therapy-refractory inflammation in the wound area                                       | 15 of 343 (4·3%)   | 7 of 170 (4·1%)    | 8 of 173 (4·6%)    |
| Presence of a heel necrosis                                                                          | 23 of 342 (6·7%)   | 10 of 168 (5·8%)   | 13 of 174 (7·5%)   |
| No lymphedema                                                                                        | 282 of 340 (81·7%) | 139 of 167 (81·3%) | 143 of 173 (82·2%) |
| Primary lymphedema                                                                                   | 12 of 340 (3·5%)   | 5 of 167 (2·9%)    | 7 of 173 (4%)      |
| Secondary lymphedema                                                                                 | 46 of 340 (13·3%)  | 23 of 167 (13·5%)  | 23 of 173 (13·2%)  |
| Clinical signs of inflammation (suspected infection)                                                 | 159 of 344 (46·1%) | 83 of 170 (48·5%)  | 76 of 174 (43·7%)  |
| Local wound swab as part of the clinical routine                                                     | 248 of 343 (71·9%) | 126 of 170 (73·7%) | 122 of 173 (70·1%) |
| Detection of germs within the local wound swab                                                       | 205 of 247 (59·4%) | 104 of 125 (60·8%) | 101 of 122 (58%)   |
| Hemoglobin                                                                                           |                    |                    |                    |
| N                                                                                                    | 177 of 345         | 86 of 171          | 91 of 174          |
| Mean (SD)                                                                                            | 9·5 (3,2)          | 9·6 (3·1)          | 9·4 (3·3)          |
| Hemoglobin A1c (HbA1c)                                                                               |                    |                    |                    |
| N                                                                                                    | 32 of 345          | 13 of 171          | 19 of 174          |
| Mean (SD)                                                                                            | 15·6 (18,3)        | 16·8 (16,7)        | 14·7 (19·6)        |
| Requiring dialysis                                                                                   | 29 of 343 (8·4%)   | 15 of 170 (8·8%)   | 14 of 173 (8·0%)   |
| Application of skin or dermal substitutes and with living cells that produce growth factors          | 0 of 341 (0%)      | 0 of 169 (0%)      | 0 of 172 (0%)      |

337 Table 2: The table shows the baseline of the identified factors possibly influencing wound closure in the ITT- population.  
 338 Findings, diagnoses and procedures documented by the investigators are presented. Data are N (%), Mean (SD), and  
 339 Minimum – Maximum [Min – Max].

340

341 Details on revascularization performed before study start are shown in Table 3.

| Revascularization before study start           | Total<br>N=345 (100 %) | NPWT<br>N=171 (49·6%) | SMWC<br>N=174 (50·4%) |
|------------------------------------------------|------------------------|-----------------------|-----------------------|
| Performed revascularization before study start | 23 of 345 (6·7%)       | 9 of 171 (5·3%)       | 14 of 174 (8·0%)      |
| Percutaneous transluminal angioplasty (PTA)    | 13 of 23 (57%)         | 6 of 9 (67%)          | 7 of 9 (50%)          |
| PTA + Stent                                    | 1 of 23 (4%)           | 0 of 9 (0%)           | 1 of 9 (7%)           |
| Veins-Bypass                                   | 5 of 23 (22%)          | 2 of 9 (22%)          | 3 of 9 (21%)          |
| Polytetrafluoroethylene (PTFE) Bypass          | 1 of 23 (4%)           | 0 of 9 (0%)           | 1 of 9 (7%)           |
| Thromboendarterectomy and patch plastic        | 2 of 23 (9%)           | 0 of 9 (0%)           | 2 of 9 (14%)          |
| Revascularization with influence on the wound  | 22 of 23 (96%)         | 9 of 9 (100%)         | 13 of 14 (93·9%)      |
| Sufficient revascularization result*           | 20 of 23 (88%)         | 7 of 9 (78%)          | 13 of 14 (93%)        |
| Insufficient revascularization result          | 2 of 23 (9%)           | 1 of 9 (11%)          | 1 of 14 (7%)          |
| Revascularization result not assessable        | 1 of 23 (4%)           | 1 of 9 (11%)          | 0 of 14 (0%)          |

342 Table 3: The table shows revascularization performed in the ITT- population before study start. Data are N (%). \* Sufficient  
 343 revascularization result was defined as successful recanalization of the tibial artery in which the foot lesion is located or, if it  
 344 is technically impossible to recanalize the respective artery, achievement of an unhindered inflow into at least one of the tibial  
 345 vessels.

346

#### 347 Results for the primary outcomes in the ITT population

348 In the ITT population, the overall number of patients with wounds closed within 16 weeks was 46 of 345 (13·3%).

349 Wound closure rate was higher in the NPWT arm (14·6%) than in the SMWC arm (12·1%) but this was not  
 350 significant (p 0·53) as the difference in healing rate between the two groups was only four patients (2·5%) (Table  
 351 4). Wounds treated with NPWT were approximately at the same risk of remaining open like patients receiving  
 352 SMWC (RR 0·97 [95% CI: 0·89-1·06]).

353

| Wound closure rate                                 | Total<br>N=345 | NPWT<br>N=171 | SMWC<br>N=174 | p        |
|----------------------------------------------------|----------------|---------------|---------------|----------|
| <b>Patients with wound closure within 16 weeks</b> |                |               |               |          |
| N (%)                                              | 46 (13.3 %)    | 25 (14.6%)    | 21 (12.1%)    | 0.53 (F) |
| [95% CI]                                           | [9.8 – 17.8]   | [9.5 –21.6]   | [7.5 – 18.4]  |          |

Table 4: The table shows the wound closure rate for the ITT-population. Data show the number (N) of participants available for the analysis in total and for both treatment arms. Wound closures within the maximum study treatment time of 16 weeks are shown with the number (N), the percentage (%) of patients, and the 95% Confidence Interval (CI). F=Fisher's Exact Test.

Beginning in week five the number of study patients with open wounds in the NPWT-arm was lower than in the SMWC-arm (Figure 2). There is no significant difference in the wound healing time between the two treatment arms ( $p = 0.244$ , Log Rank Test). Since the cumulative number of patients with open wounds was more than 70% after 16 weeks, we were not able to calculate medians for time to wound closure.

#### Results for the secondary outcomes in the ITT population

After 6 months the wound closure rate was higher in the SMWC- than in the NPWT-arm (36 of 174 [20.7 %] vs 24 of 171 [14.0 %]), but the difference was not significant ( $p 0.12$ ).

The time until optimal preparation of the wound for further treatment to achieve a complete epithelization (min 95 % granulation tissue) was significantly shorter for patients treated with NPWT ( $p 0.021$ ) (Table 5).

| Time until optimal preparation of the wound bed (min 95 % granulation tissue) | Total<br>N=183 | NPWT<br>N=100 | SMWC<br>N=83 | p            |
|-------------------------------------------------------------------------------|----------------|---------------|--------------|--------------|
| Mean (SD)                                                                     | 42.7 (39.0)    | 35.6 (34.6)   | 51.4 (42.6)  | <b>0.008</b> |
| Median (IQR)                                                                  | 31 (64)        | 22.0 (48.0)   | 49.0 (53.6)  |              |
| Min - Max                                                                     | 0 - 127        | 0 - 127       | 0 - 115      |              |

Table 5: The table shows time until optimal preparation of the wound for further treatment (min 95 % granulation tissue) for the ITT-population. Data show the number (N) of participants available for the analysis in total and for both treatment arms. Time until optimal preparation of the wound is described with mean (SD); median (IQR); and minimum (min) and maximum (max).

In the ITT population wound surface area and wound volume decreased continuously during the study treatment time of 16 weeks in both treatment arms. The values are largely scattered. Detailed information about the course

377 of wound surface area, volume and composition of tissues for both study populations are provided in the respective  
 378 tables in the appendix. Wound surface area at each observation time point until end of maximum study treatment  
 379 time of maximum of 16 weeks is separately shown for the calculated data from width and length as documented  
 380 in the eCRF and for the data derived from the photo analysis. The results of the blinded photo analysis using the  
 381 Wound Healing Analyzing Tool (W.H.A.T.) were smaller than the values documented by the clinical investigators.  
 382 Starting from a similar wound volume, the values also decreased continuously both in the NPWT- and in the  
 383 SMWC-arm, wherein the values are smaller in the NPWT-arm than in the SMWC-arm at each observation time  
 384 point.

386 Wound tissue composition is similar in both treatment arms at baseline. Granulation tissue values increase during  
 387 the study treatment period of 16 weeks and fibrin values decrease, with clinically documented values showing  
 388 only minor differences between treatment arms. The values for necrotic tissue were very low and did not differ  
 389 relevantly between the treatment arms. The results of the W.H.A.T. evaluation for granulation and fibrin deviate  
 390 markedly from the values documented by the clinical investigators. Contrary to the clinically documented values,  
 391 the W.H.A.T. evaluation shows low values for granulation and high values for fibrin.

393 No recurrences occurred during the study treatment time of 16 weeks. Between the end of the maximum study  
 394 treatment time and the follow up at 6 months, 11 recurrences (6.4 %) occurred in the 171 patients in the NPWT  
 395 arm. One patient had two recurrences. In the SMWC arm, five of 174 patients (2.9 %) had a recurrence. The  
 396 difference is not significant (RR 2.24 [95%CI: 0.80-6.31];  $p=0.131$ ) but the overall number of 17 recurrences in  
 397 16 patients was very low.

399 There was no significant difference in the number of patients with amputation or resection ( $p=1.00$ ), the overall  
 400 number of performed interventions ( $p=0.89$ ), and the number of study participants with minor (0.79) and major  
 401 amputations 0.25 between NPWT and SMWC arm (Table 6). Patients treated with NPWT were approximately at  
 402 the same risk of undergoing an amputation or resection like patients treated with SMWC (RR: 0.99 [95%CI: 0.65-  
 403 1.50]).

404

| Amputations and resections | Total | UWT   | SMWC  | p |
|----------------------------|-------|-------|-------|---|
|                            | N=345 | N=171 | N=174 |   |

|                                                                   |                           |                           |                           |          |
|-------------------------------------------------------------------|---------------------------|---------------------------|---------------------------|----------|
| <b>Study participants with amputation or resection</b>            | 71<br>20·6% [16·3 – 24,8] | 35<br>20·5% [14,4 – 26,5] | 36<br>20·7% [14·7 – 26,7] | 1·00 (F) |
| <b>Total number of amputations and resections</b>                 | 102                       | 45                        | 57                        | 0·89 (U) |
| <b>Number of amputations and resections per study participant</b> |                           |                           |                           | 0·89 (U) |
| <b>one event</b>                                                  | 49 (14·2%)                | 25 (14·6%)                | 24 (13·8%)                |          |
| <b>two events</b>                                                 | 16 (4·6%)                 | 10 (5·8%)                 | 6 (3·4%)                  |          |
| <b>three events</b>                                               | 4 (1·2%)                  | 0 (0%)                    | 4 (2·3%)                  |          |
| <b>four events</b>                                                | 1 (0·3%)                  | 0 (0%)                    | 1 (0·6%)                  |          |
| <b>five events</b>                                                | 1 (0·3%)                  | 0 (0%)                    | 1 (0·6%)                  |          |
| <b>Study participants with minor amputation</b>                   | 69 (20·0%)                | 33 (19·3%)                | 36 (20·7%)                | 0·79 (F) |
| <b>Study participants with major amputation</b>                   | 2 (0·6%)                  | 2 (1·2%)                  | 0 (0%)                    | 0·25 (F) |

Table 6: The table shows the number of study participants with amputations / resections and the number of amputations / resections performed for the ITT-population. Data show the number (N) of participants, the percentage with the 95% Confidence Interval (95%CI), or the number of events accompanied with the respective percentage values in total and for both treatment arms. F = Fisher's Exact Test; U = Mann-Whitney U-Test.

Overall, pain levels were very low and decreased further during the study treatment time. The values hardly differ between the treatment arms at any observation time point. A table with pain levels can be found in the appendix.

At baseline Quality of life (EQ5D) had significant limitations in both treatment arms. Patients reaching the end of treatment within 16 weeks showed improved EQ5D levels in the NPWT arm and in the SMWC arm. Similar results have been found for patients who reached the end of the maximum treatment time without successful end of therapy. At the follow-up time after 6-months all patients still show increased EQ5D levels in both treatment arms. A table with detailed results for the EQ5D is provided in the appendix.

#### Safety results

The number of study participants with AEs was significantly higher in the NPWT arm (96 (56·1%)) than in the SMWC arm (72 (41·4%)) (p=0·007) but only 16 (10·2%) of the AEs in the NPWT arm were decided by the investigators to have a definite relation to the medical device (Table 7). The number of study participants with at least one AE documented to be serious (SAE) was not significantly different between the treatment arms (NPWT



424 N=63 (36,8%); SMWC N=58 (33,3%); p 0·50) (Table 7). None of the SAEs in the NPWT arm was documented  
 425 as definitely or possibly related to the medical device by investigators. For 9 of 244 AEs (6·1%) in the NPWT arm  
 426 and 6 of 96 AEs (6·3%) in the SMWC arm the outcome death was documented. arm.

| <b>Adverse events (AEs) and Serious adverse events (SAEs)</b>              | <b>Total<br/>N=345</b> | <b>NPWT<br/>N=171</b> | <b>SMWC<br/>N=174</b> | <b>p</b>  |
|----------------------------------------------------------------------------|------------------------|-----------------------|-----------------------|-----------|
| Study participants with at least one AE<br>N (%)                           | 168 (48·7%)            | 96 (56·1%)            | 72 (41·4%)            | 0·007 (F) |
| Study participants with one AE<br>N                                        | 103                    | 54                    | 49                    |           |
| Study participants with two or more AEs<br>N                               | 65                     | 42                    | 23                    |           |
| Total number of AEs<br>N                                                   | 269                    | 167                   | 102                   |           |
| AEs with relationship to the medical device<br>N <sub>available</sub>      | 257                    | 157                   | 100                   |           |
| Yes                                                                        | 16 (6·2%)              | 16 (10·2%)            | 0 (0%)                |           |
| Possible                                                                   | 13 (5·1%)              | 11 (7·0%)             | 2 (2·0%) *            |           |
| No                                                                         | 211 (82·1%)            | 117 (74·5%)           | 94 (94·0%)            |           |
| Not assessable                                                             | 17 (6·6%)              | 13 (8·3%)             | 4 (4·0%)              |           |
| AEs with relationship to SMWC<br>N <sub>available</sub>                    | 185                    | 110                   | 75                    |           |
| Yes                                                                        | 2 (1·1%)               | 0 (0%)                | 2 (2·7%)              |           |
| Possible                                                                   | 5 (2·7%)               | 5 (4·5%)              | 0 (0%)                |           |
| No                                                                         | 163 (88·1%)            | 96 (87·3%)            | 67 (89·3%)            |           |
| Not assessable                                                             | 15 (8·1%)              | 9 (8·2%)              | 6 (8·0%)              |           |
| AEs with relationship to the treatment procedure<br>N <sub>available</sub> | 244                    | 148                   | 96                    |           |
| Yes                                                                        | 10 (4·1%)              | 6 (4·1%)              | 4 (4·2%)              |           |
| Possible                                                                   | 17 (7·0%)              | 15 (10·1%)            | 2 (2·1%)              |           |
| No                                                                         | 191 (78·3%)            | 111 (75·0%)           | 80 (83·3%)            |           |
| Not assessable                                                             | 26 (10·7%)             | 16 (10·8%)            | 10 (10·4%)            |           |
| Study participants with at least one SAE<br>N (%)                          | 121 (35·1%)            | 63 (36·8%)            | 58 (33·3%)            | 0·50 (F)  |

|                                                   |             |            |            |  |
|---------------------------------------------------|-------------|------------|------------|--|
| Study participants with one SAE                   |             |            |            |  |
| N                                                 | 90          | 45         | 45         |  |
| Study participants with two or more SAEs          |             |            |            |  |
| N                                                 | 31          | 18         | 13         |  |
| Total number of SAEs                              |             |            |            |  |
| N                                                 | 163         | 87         | 76         |  |
| SAEs with relationship to the medical device      |             |            |            |  |
| N <sub>available</sub>                            | 161         | 85         | 76         |  |
| Yes                                               | 0 (0%)      | 0 (0%)     | 0 (0%)     |  |
| Possible                                          | 0 (0%)      | 0 (0%)     | 0 (0%)     |  |
| No                                                | 154 (95.7%) | 79 (92.9%) | 75 (98.7%) |  |
| Not assessable                                    | 7 (4.3%)    | 6 (7.1%)   | 1 (1.3%)   |  |
| SAEs with relationship to SMWC                    |             |            |            |  |
| N <sub>available</sub>                            | 121         | 64         | 57         |  |
| Yes                                               | 1 (0.8%)    | 0 (0%)     | 1 (1.8%)   |  |
| Possible                                          | 1 (0.8%)    | 1 (1.6%)   | 0 (0%)     |  |
| No                                                | 113 (93.4%) | 57 (89.1%) | 56 (98.2%) |  |
| Not assessable                                    | 6 (5.0%)    | 6 (9.4%)   | 0 (0%)     |  |
| SAEs with relationship to the treatment procedure |             |            |            |  |
| N <sub>available</sub>                            | 156         | 84         | 72         |  |
| Yes                                               | 4 (2.6%)    | 0 (0%)     | 4 (5.6%)   |  |
| Possible                                          | 2 (1.3%)    | 2 (2.4%)   | 0 (0%)     |  |
| No                                                | 140 (89.7%) | 74 (88.1%) | 66 (91.7%) |  |
| Not assessable                                    | 10 (6.4%)   | 8 (9.5%)   | 2 (2.8%)   |  |

427 Table 7: The table shows the number of study participants with AEs and SAEs and the number of AEs and SAEs for the ITT-  
 428 population. Data show the number (N) and the percentage (%) in total and for both treatment arms. \* No treatment change to  
 429 NPWT has been documented. F = Fisher's Exact Test (alpha=0.05).

430

431

### 432 Secondary analyses and subgroups

433 The univariate analysis of predefined covariates potentially influencing wound closure in the ITT population  
 434 showed that only the presence of an infection at the time of randomization was significantly associated with both  
 435 the wound closure rate and time. The influencing factor "infection" was almost equally represented in both  
 436 treatment arms (NPWT 35.1 [27.9 – 42.2] % N=60; SCWT 32.8 [25.8 – 39.7] % N= 57), so the treatment

1  
2  
3 437 comparison was not influenced by this confounder. Of the a priori defined factors potentially influencing wound  
4  
5 438 closure nine factors needed to be excluded because the number of missing values was too high or they were never  
6  
7 439 documented by the investigators. The covariate peripheral arterial occlusive disease had significant influence on  
8  
9 440 the time until wound closure (p 0.026) and infection had a significant influence on the wound healing rate (p  
10  
11 441 0.012). However, both influencing factors were almost evenly distributed over both study arms by randomization.  
12  
13 442 Thus, the comparison of the treatment arms was also not influenced by these confounders.

14  
15 443 In the ITT population in 173 study participants the median wound surface area was smaller than 484 mm<sup>2</sup> and in  
16  
17 444 172 study participants wounds were bigger than 484 mm<sup>2</sup>. In the NPWT arm 48.5% (N=83) of patients had small  
18  
19 445 wounds and 51.5% (N=88) of patients had large wounds. The SMWC arm had 51.7% (N=90) small wounds and  
20  
21 446 48.3% (N=84) big wounds. The differences between the treatment arms were not significant.

22  
23 447 An overview of the measures for small and big wounds and detailed results for this subgroup analysis can be found  
24  
25 448 in the appendix.

26  
27 449 In the subgroup of big wounds, wound closure rate was significantly higher in the NPWT arm within 16 weeks (p  
28  
29 450 0.08). Patients with big wounds have a lower risk of not achieving wound closure within 16 weeks when treated  
30  
31 451 with NPWT (RR 0.91 [95%CI: 0.82-1.0]). In the subgroup of big wounds, a significantly faster wound closure  
32  
33 452 was achieved in the NPWT arm (p 0.027) (Figure 3). Time until complete, sustained and verified wound closure  
34  
35 453 was not significantly different between the treatment arms in the subgroup of small wounds (Figure 4).

36  
37 454 In the subgroup of small wounds, the time to reach 95 % granulation tissue was significantly shorter for the patients  
38  
39 455 treated with NPWT (p 0.005). Time until optimal wound bed preparation was shorter in the NPWT arm in the  
40  
41 456 subgroup of big wounds, but did not significantly differ to the result of the SMWC arm (p 0.27). There are no  
42  
43 457 relevant or significant differences in the overall number of patients with amputation or resection between the  
44  
45 458 treatment arms in both subgroups. Both major amputations were performed in patients with big wounds treated  
46  
47 459 with NPWT. Due to the low overall number of recurrences (N=16) we were not able to perform a subgroup analysis  
48  
49 460 for this outcome parameter.

50  
51 461

#### 52 462 Results for the primary and secondary outcomes in the PP population

53  
54 463 In the PP-population study participants treated with NPWT showed a 14.5 % higher wound closure rate within 16  
55  
56 464 weeks than those treated with SMWC (Appendix), but the difference was not significant (p 0.053). Wounds treated  
57  
58 465 with NPWT had a lower risk of remaining open after 16 weeks (RR 0.82 [95%CI: 0.66-1.03]) than wounds treated  
59  
60 466 with SMWC. Time to wound closure in the NPWT arm was significantly shorter (p=0.004) (Figure 5). After 6  
467 months, wound closure rate in the SMWC-arm was higher than in the NPWT-arm, but the difference was not

1  
2  
3 468 significant (p 0·84). As in the ITT population, optimal wound bed preparation was achieved significantly faster in  
4  
5 469 patients receiving NPWT (p<0·001). Patients receiving NPWT had a higher risk of recurrence than those in the  
6  
7 470 control group (RR 1·50 [95%CI: 0·37-6·01]), however there was no significant difference between the treatment  
8  
9 471 arms regarding the total number of recurrences (p 0·38) or the number of patients with recurrences (p 0·69). 9  
10  
11 472 patients in the NPWT group and 21 (21·4%) patients in the SMWC group had an amputation or resection (NPWT  
12  
13 473 RR 1·07 [95%CI: 0·53-2·15]). Neither the number of patients with amputations or resections (NPWT 9 (20·5%)  
14  
15 474 SMWC 21 (21·4%) p 0·83) nor the number of amputations or resections performed (NPWT 11 SMWC 28 p 0·86)  
16  
17 475 differ significantly between the treatment arms. No major amputations were performed in the PP population. In  
18  
19 476 the PP-population wound surface area started at smaller baseline levels and decreased faster than in the ITT-  
20  
21 477 population whereas the measures were smaller in the NPWT arm than in the SMWC arm. Wound volume started  
22  
23 478 higher in the NPWT arm and ended at similar levels for the treatment arms after decreasing continuously during  
24  
25 479 the treatment period. This effect was stronger in the SMWC arm. Wound volume measures were lower in the PP-  
26  
27 480 population than in the ITT-population. Wound tissues had a similar course over time like in the ITT population  
28  
29 481 but showed higher values for granulation as well as lower values for fibrin and necrosis in the PP population. Like  
30  
31 482 in the ITT population, pain levels were very low, showing no relevant difference between the treatment arms, and  
32  
33 483 further decreased during the study treatment period. In the PP-population EQ5D values are higher than in the ITT  
34  
35 484 population during screening, but still show that all patients have significant problems. In the NPWT arm QoL  
36  
37 485 measures are similar to those of the SMWC arm for patients reaching end of maximum treatment time before end  
38  
39 486 of therapy. EQ5D shows higher values for patients reaching the end of therapy during the study treatment time of  
40  
41 487 16 weeks. Detailed results for the PP population can be found in the appendix.

488

#### 489 Additional results on treatment compliance and documentation quality

490 29 (17·0%) patients in the NPWT group had a temporary therapy change to SMWC (mean duration 20·5 ± 21·6  
491 days). In the SMWC group, 17 (9·8%) patients had a temporary therapy change to NPWT (mean duration 28·9 ±  
492 21·6 days). For only 2 of the 29 NPWT patients (6·9%) with a temporary therapy change to SMWC the wound  
493 closure was achieved within 16 weeks, whereas 16·2% (23 von 142) of the wounds of the NPWT patients without  
494 therapy change were completely closed.

495 A total of 57·3% (98 of 171) of the patients randomized to NPWT completed treatment before achieving a  
496 granulation surface of the wound of at least 95%. Fewer patients with this premature end of NPWT (4·7%, N=8)  
497 achieved a complete wound closure than patients with no premature end of therapy (9·9, N=17). Mean NPWT-

1  
2  
3 498 duration until premature end of therapy was 28.5 days (SD 24.1), while a mean granulation area of 59.6% (SD 30.  
4  
5 499 5) was achieved.  
6  
7 500 For 131 patients (76.6%) in the NPWT arm less than the required three dressing changes per week were  
8  
9 501 documented. 19 patients (14.5%) with this protocol violation achieved a complete wound closure. Six (15.4%)  
10  
11 502 of the 39 NPWT patients who received at least 3 therapy changes per week achieved a complete wound closure.  
12  
13 503 In the electronic Case Report Forms (eCRF) a wound closure was documented for 96 patients (NPWT 56 of 171;  
14  
15 504 SMWC 40 of 174), but only for 46 patients (NPWT 25; SMWC 21) all criteria for a complete, verified and  
16  
17 505 sustained wound closure have been met. For the wound closure visit seven wound photographs (NPWT 7; SMWC  
18  
19 506 0) and for the wound closure confirmation visit four photographs (NPWT 3; SMWC 1) were missing. In addition,  
20  
21 507 two of the existing wound photographs for the wound closure (NPWT 0; SMWC 2) and two photographs for the  
22  
23 508 wound closure confirmation (NPWT 1, SMWC 3) were not assessable by the blinded observers due to serious  
24  
25 509 quality issues. Furthermore 23 (NPWT 15; SMWC 8) existing and assessable wound photographs were not able  
26  
27 510 to confirm the wound closure and 3 (NPWT 1; SMWC 2) photographs were not able to confirm the wound closure  
28  
29 511 after 14 days.  
30  
31  
32  
33  
34  
35  
36  
37  
38  
39  
40  
41  
42  
43  
44  
45  
46  
47  
48  
49  
50  
51  
52  
53  
54  
55  
56  
57  
58  
59  
60

**512 Discussion**

513 The DiaFu-study did not demonstrate significant superiority in wound closure rate or time to complete wound  
514 closure for either NPWT or SMWC. Wound closure rates were higher in the NPWT arm but did not significantly  
515 differ from those in the SMWC arm. Time to wound healing in the NPWT group was lower than in the SMWC  
516 arm while the difference between the treatment arms becomes statistically significant only in the PP population.  
517 Thus, with this study we were not able to confirm our hypothesis that wound closure can be achieved more often  
518 and faster with NPWT than with SMWC when used in German real-life clinical practice. Previous RCTs, which  
519 were the basis for sample size calculation, showed a higher rate and a significant superiority in healing when using  
520 NPWT on amputation and chronic wounds [16, 17], but the populations of these studies were different. Other than  
521 the DiaFu-study the studies of Armstrong and Blume excluded patients with Wagner stage four; active Charcot;  
522 uncontrolled hyperglycemia and therapy with glucocorticoids, immunosuppressants or chemotherapy; and  
523 required proof of adequate perfusion. The DiaFu-study, did not exclude patients with impaired perfusion, but  
524 required adequate therapy of the circulatory disorder according to clinical practice guidelines. However, baseline  
525 data show that the proportion of patients with critical limb ischemia in the DiaFu-study was low and did not differ  
526 significantly between the treatment arms. Additionally, patients with venous insufficiency were excluded from the  
527 Armstrong-study. The DiaFu study included more than twice as many patients as the Armstrong-study and patients  
528 were older than in both other studies. However, the probably most serious difference between the studies is that  
529 the DiaFu-study was performed in (German) real-life clinical practice including all factors that affect therapy. Our  
530 study is the first to show that temporary therapy changes and premature therapy cessation have a negative impact  
531 on reaching the patient relevant therapy outcome complete wound closure in study participants treated with NPWT.  
532 Optimal preparation of the wound bed (95% granulation tissue) was achieved significantly earlier when using  
533 NPWT in the ITT and the PP population, but the overall rate of wound closures was low. Wound bed preparation  
534 and granulation tissue formation are important prerequisites for wound healing, but are not a proof of treatment  
535 effectiveness and cannot serve as a basis for benefit assessment.

536 We were able to show that although significantly more AEs were documented in the NPWT arm only a small  
537 number of these events were related to the medical device according to the investigator's assessment. Mortality  
538 rates were very low in both treatment arms and there was no significant difference between the treatment arms  
539 regarding amputations and resections performed during the study. Only two major amputations have been  
540 performed in patients with big wounds treated with NPWT. None of the treatments resulted in an additional  
541 impairment of the patients' quality of life during study treatment time or follow up. Time until complete wound

1  
2  
3 542 closure was significantly shorter with NPWT than with SMWC in the subgroup of big wounds, which indicates  
4  
5 543 that NPWT has the potential to be a valuable treatment option for this kind of wounds.

6  
7 544 In the DiaFu-study methods against bias have been implemented whenever possible in order to avoid bias that  
8  
9 545 have been described by several systematic reviews [18-22], but shortcomings in documentation quality and  
10  
11 546 missing compliance to therapy guidelines negatively impact the results.

12  
13 547 Not addressing and analyzing all factors influencing the overall treatment outcome like targeted pressure relief,  
14  
15 548 continuous infection control and adequate treatment of the underlying disease during the study treatment and  
16  
17 549 observation period may be seen as a limitation of this health care research study. Study sites have been selected  
18  
19 550 based on a self-disclosure by means of a qualification checklist and cross checks using quality reports. This ensured  
20  
21 551 that all prerequisites were met for guideline-compliant patient care. Nevertheless, even in the application of NPWT  
22  
23 552 there were deviations from the standards. Anyway, questioning the quality of investigators' treatment was not the  
24  
25 553 main focus of this trial and evaluating the individual treatment quality within a single RCT is neither feasible nor  
26  
27 554 effective.

28 555 In order to support the decision-making process of the German G-BA on general reimbursement of NPWT in  
29  
30 556 German outpatient care the real-life clinical practice DiaFu-study included patients with chronic DFUs of  
31  
32 557 neuropathic and angiopathic origin regardless of whether a simple wound cleansing, tissue debridement or even  
33  
34 558 amputation was necessary prior to application of wound therapy targeted to achieve complete wound closure. The  
35  
36 559 study was performed without excluding concomitant diseases negatively impacting wound healing; with therapy  
37  
38 560 application in the discretion of the attending physician; and with evaluation of patient relevant outcome. Thus,  
39  
40 561 results can easy be generalized and applied in clinical practice settings. Anyway, shortcomings in data quality  
41  
42 562 negatively impacted the study results and statements about specific patient groups were not possible.

43 563

#### 44 564 **Conclusions**

45  
46  
47 565 NPWT was not superior to SMWC when evaluated in German real-life clinical practice. Missing compliance with  
48  
49 566 therapy guidelines and poor documentation quality led to restrictions in achieving the patient-relevant endpoint  
50  
51 567 complete wound closure and prevents a clear proof of effectiveness. The question if NPWT is superior to SMWC  
52  
53 568 for treating diabetic foot wounds remains unanswered due to the limitations of the DiaFu-study. An overall low  
54  
55 569 number of wound closures indicate problems with the overall treatment quality. Despite all limitations NPWT  
56  
57 570 showed a significant superiority in optimal wound bed preparation. This indicates that NPWT works according to  
58  
59 571 its intended use and has at least a potential to be a valuable treatment option.

1  
2  
3 572 Furthermore, the results of the PP population suggest that without the negative impact of premature treatment  
4  
5 573 cessation, temporary changes of the randomized therapy and partly incomplete documentation, NPWT may be  
6  
7 574 more effective for treating diabetic foot wounds than SMWC.  
8  
9 575 In Germany, NPWT should be evaluated again after implementation of a sufficient, well-considered and widely-  
10  
11 576 accepted concept for quality control. In a future health care research study, the treatment outcome before and after  
12  
13 577 the implementation of these quality measures should be evaluated, for which the results of this trial may serve as  
14  
15 578 a basis. Practitioners worldwide should review their processes with regard to the problems described here.  
16  
17 579

For peer review only



1  
2  
3 **580 Ethics approval and consent to participate**  
4

5 581 Ethical approval of the main ethical committee (EC): Ethical Committee of the University of Witten-Herdecke,  
6  
7 582 has been fully granted without any conditions. Due to performing the trial according to § 23b MPG (German  
8  
9 583 Medical Device Act), participating study sites in Germany only received a consultation for the main clinical  
10  
11 584 investigator according to professional law by the respective EC. All investigators have been fully approved by the  
12  
13 585 respective ECs. An evaluation of the study's content by ECs of participating study sites in Germany was not  
14  
15 586 applicable. All study participants gave written informed consent prior to randomization and any trial related  
16  
17 587 procedure.  
18

19 588

20 **589 Data sharing**  
21

22 590 The datasets used and/or analyzed during the current study are available from the corresponding author on  
23  
24 591 reasonable request. Datasets are available in German language.  
25

26 592

27  
28 **593 Competing interests**  
29

30 594 All authors have completed the ICMJE uniform disclosure form at [www.icmje.org/coi\\_disclosure.pdf](http://www.icmje.org/coi_disclosure.pdf) and declare:  
31  
32 595 The German statutory health insurance companies commissioned the Witten/Herdecke University (UW/H) to plan,  
33  
34 596 conduct, analyze and publish the study. Dörthe Seidel is an employee of the UW/H. The study has been financed  
35  
36 597 by the manufacturers KCI (Acelity) and Smith&Nephew. Dörthe Seidel received a consulting fee for the  
37  
38 598 presentation of the study during an event organized by the manufacturer Hartmann. During study planning and  
39  
40 599 conduct Edmund Neugebauer was an employee of the UW/H. He was the director of the IFOM.

41 600 The clinical investigators Martin Storck, Holger Lawall, Gernold Wozniak, Peter Maukner, Dirk Hochlenert,  
42  
43 601 Walter Wetzel-Roth, Klemens Sondern, Matthias Hahn, Gerhard Rothenaicher, Thomas Krönert and Karl Zink  
44  
45 602 received a case fee of 1000 € for each patient included in the DiaFu-study in order to compensate for the additional  
46  
47 603 organizational and especially the documentation effort during trial conduct. Furthermore all investigators received  
48  
49 604 compensation for travelling to the investigator meetings. The institutions of the investigators used integrated care  
50  
51 605 contracts for NPWT during study conduct in order to provide best practice for the study participants during  
52  
53 606 outpatient care.

54 607 Gernold Wozniak and Walter Wetzel-Roth are members of the scientific advisory board of the manufacturer  
55  
56 608 Kinetic Concepts Incorporated (KCI) (now Acelity).  
57

58 609

59  
60 **610 Funding**

1  
2  
3 611 Through a European tender the study was initiated by a consortium of 19 statutory German health insurance funds,  
4  
5 612 which provided integrated care contracts for all study participants and for up to 7000 patients with acute and  
6  
7 613 chronic wounds in Germany; defined basic rules for study design based on the requirements of the German  
8  
9 614 authorities; and provided a critical review of the study protocol and the final report. The study was funded by the  
10  
11 615 manufacturers Kinetic Concepts Incorporated (KCI) and Smith & Nephew (S&N). Both companies provided the  
12  
13 616 NPWT devices and associated consumable supplies in the assigned regions of Germany as well as all necessary  
14  
15 617 support and information about the used material. The manufacturers had no role in study design, data collection,  
16  
17 618 data analysis, data interpretation, or writing of the report. All authors had full access to all of the data (including  
18  
19 619 statistical reports and tables) in the study and take full responsibility for the accuracy of the data analysis.

620

### 621 **Authors' contributions**

622 Dörthe Seidel was the principal coordinating investigator. She conceived the study, reviewed the scientific  
623 literature, and was responsible for study design, data analysis, data interpretation, writing and reviewing of the  
624 report. She is the lead author and takes overall responsibility for this report. She affirms that the manuscript is an  
625 honest, accurate, and transparent account of the study being reported; that no important aspects of the study have  
626 been omitted; and that any discrepancies from the study as originally planned (and, if relevant, registered) have  
627 been explained.

628 Martin Storck and Holger Lawall were study investigators and contributed to study design, data collection and  
629 interpretation, and reviewed the report.

630 Gernold Wozniak, Peter Maukner, Walter Wetzels-Roth and Dirk Hochlenert were study investigators and  
631 contributed to data collection and data interpretation and reviewed the report.

632 Klemens Sondern, Matthias Hahn, Gerhard Rothenaicher, Thomas Krönert and Karl Zink were study investigators  
633 and contributed to data collection and reviewed the report.

634 Edmund Neugebauer contributed to study design and data interpretation and reviewed the report.

635 All authors approved the final version of the report.

636

### 637 **Acknowledgements**

638 The authors thank all investigators, nurses, patients and partners for supporting the study.

639 At least one patient was included in the following facilities: HSK - Dr. Horst Schmidt Kliniken GmbH Klinik für  
640 Gefäßchirurgie Ludwig-Erhard-Straße 100 65199 Wiesbaden; Asklepios Westklinikum Hamburg Zentrum für  
641 Gefäßmedizin Suurheid 20 22559 Hamburg; Knappschafts Krankenhaus Bottrop Gefäßchirurgische Klinik

- 1  
2  
3 642 Osterfelderstraße 157 46242 Bottrop; Städtisches Klinikum Karlsruhe Klinik für Gefäß- und Thoraxchirurgie  
4  
5 643 Moltkestraße 90 76133 Karlsruhe; Gemeinschaftspraxis Schlotmann-Hochlenert-Zavaleta-Haberstock Merheimer  
6  
7 644 Straße 217 50733 Köln; Klinikum Döbeln Abt. für Gefäßchirurgie Sörmitzer Straße 10 04720 Döbeln; Klinikum  
8  
9 645 Bielefeld Mitte Klinik für Allgemeine Innere Medizin Teutoburger Straße 50 33604 Bielefeld; Klinikum  
10  
11 646 Frankfurt/Oder Klinik für Gefäßchirurgie Müllroser Chaussee 7 15236 Frankfurt/Oder; Weißeritztal-Kliniken  
12  
13 647 GmbH Medizinische Klinik III Bürgerstraße 7 01705 Freital; Krankenhaus Porz am Rhein Klinik für  
14  
15 648 Gefäßchirurgie Urbacher Weg 19 51149 Köln; St. Remigius Krankenhaus Opladen Innere Medizin An St.  
16  
17 649 Remigius 26 51379 Leverkusen; Marien Hospital Dortmund-Hombruch Klinik für Innere Medizin/Diabetologie  
18  
19 650 Gablonzstraße 9 44225 Dortmund; Zentrum für Chirurgie Klinik für Gefäß- und Endovascularchirurgie Theodor-  
20  
21 651 Stern-Kai 7, Haus 23C/EG 60590 Frankfurt am Main; Facharzt für Chirurgie Thorax-Kardiovaskularchirurgie  
22  
23 652 Hindenburgstraße 1 86807 Buchloe; Helfenstein Klinik Geisslingen Allgemein- und Viszeralchirurgie Eybstraße  
24  
25 653 16 73312 Geislingen/Steige; Paracelsus-Klinik am Silbersee Wundzentrum Hannover Oertzeweg 24 30851  
26  
27 654 Langenhagen; Klinikum Darmstadt Chirurgische Klinik III Grafenstraße 9 64283 Darmstadt; Ortenau Klinikum  
28  
29 655 Offenburg-Ebertplatz Klinik für Allgemein-, Viszeral- und Gefäßchirurgie Ebertplatz 12 77654 Offenburg;  
30  
31 656 Thüringen-Kliniken "Georgius Agricola" GmbH Klinik für Gefäßchirurgie Rainweg 68 07318 Saalfeld; Klinikum  
32  
33 657 Dorothea Christiane Erxleben GmbH Klinik für Allgemein-, Viszeral- und Gefäßchirurgie Ditfurter Weg 24 06484  
34  
35 658 Quedlinburg; Franziskus-Krankenhaus Berlin Abt. für Innere Medizin Budapester Straße 15-19 10787 Berlin;  
36  
37 659 Hegau-Bodensee Klinikum Radolfzell (HBK) Klinik für Innere Medizin Hausherrenstraße 12 78315 Radolfzell;  
38  
39 660 Diabetologische Schwerpunktpraxis Dr. med. Hansjörg Mühlen & Partner Ruhrorter Straße 195 47119 Duisburg;  
40  
41 661 Kliniken Maria Hilf Mönchengladbach Klinik für Gefäßchirurgie und Angiologie Sandradstraße 43 41061  
42  
43 662 Mönchengladbach; Städtisches Klinikum München/Bogenhausen Klinik für Endokrinologie, Diabetologie und  
44  
45 663 Angiologie Englschalkingerstraße 77 81925 München; Gerhard Rothenaicher Facharzt für Chirurgie Cosimastraße  
46  
47 664 2 81927 München; Bürgerhospital Frankfurt am Main Interdisziplinäres Zentrum Diabetischer Fuß (DDG)  
48  
49 665 Nibelungenallee 37- 41 60318 Frankfurt am Main; Gemeinschaftspraxis für Chirurgie und Gefäßmedizin Drs.  
50  
51 666 Alter/Pourhassan/Heim Klosterstraße 12 46145 Oberhausen; Ev. KH Königin Elisabeth Herzberge gGmbH Abt.  
52  
53 667 für Kardiologie, Angiologie und Diabetologie Herzbergstraße 79 10365 Berlin; Städtisches Klinikum Neunkirchen  
54  
55 668 gGmbH Abt. für Gefäßchirurgie & Phlebologie Brunnenstraße 20 66538 Neunkirchen; Westküstenklinikum Heide  
56  
57 669 Klinik für Viszeral- und Gefäßchirurgie Esmarchstraße 50 25746 Heide/Holstein; Chir. Praxisgemeinschaft am  
58  
59 670 Bayenthalgürtel Praxis Dr. med. Gerald Engels Bayenthalgürtel 45 50968 Köln; Malteser Krankenhaus – St.  
60  
671 Franziskus-Hospital Medizinische Klinik I, Abt. für Diabetologie Waldstraße 17 24939 Flensburg; St.  
672 Marienkrankenhaus Siegen gGmbH Klinik für Gastroenterologie Kampenstraße 51 57072 Siegen; Krankenhaus

1  
2  
3 673 Bietigheim Klinik für Innere Medizin, Kardiologie, Endokrinologie, Diabetologie und Internistische  
4  
5 674 Intensivmedizin Riedstraße 12 74321 Bietigheim-Bissingen; Asklepios Kliniken Harburg Eißendorfer Pferdeweg  
6  
7 675 52 21075 Hamburg; Diabetologikum Ludwigshafen Diabetes-Schwerpunktpraxis Ludwigsplatz 9 67059  
8  
9 676 Ludwigshafen; Mariannen-Hospital Werl Abt. für Chirurgie Unnaer Straße 15 59457 Werl; Diabetes Klinik GmbH  
10  
11 677 & Co KG Theodor-Klotzbücher-Straße 12 97980 Bad Mergentheim; Institut für Diabetesforschung Münster  
12  
13 678 GmbH Hohenzollernring 70 48145 Münster.

14 679 The study was initiated by a consortium of 19 statutory German health insurance funds represented by the AOK  
15  
16 680 federal association (AOK-Bundesverband – AOK-BV), the association of alternative health insurance funds  
17  
18 681 (Verband der Ersatzkrankenkassen – vdek) and the minors (Knappschaft). In order to guarantee outpatient care for  
19  
20 682 all study participants without any restrictions, the contracting health insurance companies provided integrated care  
21  
22 683 contracts for outpatient negative pressure wound therapy.

23  
24 684 A project advisory board was implemented to coordinate all processes and project partners. The board comprised  
25  
26 685 two representatives each from the statutory health insurance funds, the management company and the sponsor as  
27  
28 686 well as one representative each from the participating medical device manufacturers (KCI and smith & nephew).  
29  
30 687 Representing the contracting authority (statutory German health insurance funds) Dr. Gerhard Schillinger (AOK-  
31  
32 688 BV) and Ute Leonhard (vdek) acted as contact persons for all aspects of the project.

33  
34 689 The management company “Gesundheitsforen Leipzig” has been entirely responsible for the logistics of the study.  
35  
36 690 Central tasks of the management company included the recruitment of study sites and patients, the development  
37  
38 691 of the IT infrastructure including the documentation, communication and invoicing software as well as the  
39  
40 692 processing of all payments.

41 693 The manufacturers Kinetic Concepts Incorporated (KCI) (Acelity) and smith & nephew provided the NPWT  
42  
43 694 devices as well as support and training for the investigators and financed the study.

44  
45 695 The Private University of Witten/Herdecke gGmbH acted as the Sponsor of the trial and the Institute for Research  
46  
47 696 in Operative Medicine with its former director Prof. E.A.M. Neugebauer, the current interim head Prof. Rolf  
48  
49 697 Lefering and the head of the division for clinical research Dörthe Seidel was responsible for the scientific  
50  
51 698 conception, the evaluation as well as the reporting and publication of the study. Prof. Dr. Rolf Lefering was  
52  
53 699 responsible for the statistical planning and analysis. PD Dr. Peter Krüger was responsible for the data management  
54  
55 700 of the study. Special thanks are going to Stefan Bauer, who supported the data management as well as the statistical  
56  
57 701 analysis and reporting.

58 702 We would like to thank Sophie Thorn, who checked the article as a native English speaker with regard to spelling  
59  
60 703 and grammar.

1  
2  
3 704 **List of figures:**  
4

5 705 Figure 1: Trial profile (CONSORT)  
6

7 706 Figure 2: Time until complete, sustained and verified wound closure in the ITT-population  
8

9 707 Figure 3: Time until complete, sustained and verified wound closure for the subgroup of big wounds  
10

11 708 Figure 4: Time until complete, sustained and verified wound closure for the subgroup of small wounds  
12

13 709 Figure 5: Time until complete, sustained and verified wound closure in the PP-population  
14

15 710  
16  
17  
18  
19  
20  
21  
22  
23  
24  
25  
26  
27  
28  
29  
30  
31  
32  
33  
34  
35  
36  
37  
38  
39  
40  
41  
42  
43  
44  
45  
46  
47  
48  
49  
50  
51  
52  
53  
54  
55  
56  
57  
58  
59  
60

For peer review only

711 **References**

- 712 1. World Health Organization, *Global report on diabetes*. 2016, WHO:  
713 <http://www.who.int/diabetes/global-report/en/>.
- 714 2. International Diabetes Federation, *IDF Diabetes Atlas*. 2015, IDF: [www.diabetesatlas.org](http://www.diabetesatlas.org).
- 715 3. Yazdanpanah, L., M. Nasiri, and S. Adarvishi, *Literature review on the management of*  
716 *diabetic foot ulcer*. World J Diabetes, 2015. **6**(1): p. 37-53.
- 717 4. Leone, S., et al., [*Epidemiology of diabetic foot*]. Infez Med, 2012. **20** Suppl 1: p. 8-13.
- 718 5. Wu, L., et al., *Dressings for treating foot ulcers in people with diabetes: an overview of*  
719 *systematic reviews*. Cochrane Database Syst Rev, 2015(7): p. CD010471.
- 720 6. Norman, G., et al., *Dressings and topical agents for treating venous leg ulcers*. Cochrane  
721 Database Syst Rev, 2018. **6**: p. CD012583.
- 722 7. Wu, S.C., W. Marston, and D.G. Armstrong, *Wound care: the role of advanced wound-healing*  
723 *technologies*. J Am Podiatr Med Assoc, 2010. **100**(5): p. 385-94.
- 724 8. Fleischmann, W., et al., [*Vacuum sealing as treatment of soft tissue damage in open*  
725 *fractures*]. Unfallchirurg, 1993. **96**(9): p. 488-92.
- 726 9. Argenta, L.C. and M.J. Morykwas, *Vacuum-assisted closure: a new method for wound control*  
727 *and treatment: clinical experience*. Ann Plast Surg, 1997. **38**(6): p. 563-76; discussion 577.
- 728 10. Morykwas, M.J., et al., *Vacuum-assisted closure: a new method for wound control and*  
729 *treatment: animal studies and basic foundation*. Ann Plast Surg, 1997. **38**(6): p. 553-62.
- 730 11. Morykwas, M.J., et al., *Effects of varying levels of subatmospheric pressure on the rate of*  
731 *granulation tissue formation in experimental wounds in swine*. Ann Plast Surg, 2001. **47**(5): p.  
732 547-51.
- 733 12. Gregor, S., et al., *Negative pressure wound therapy: a vacuum of evidence?* Arch Surg, 2008.  
734 **143**(2): p. 189-96.
- 735 13. Peinemann, F. and S. Sauerland, *Negative-pressure wound therapy: systematic review of*  
736 *randomized controlled trials*. Dtsch Arztebl Int, 2011. **108**(22): p. 381-9.
- 737 14. Ubbink Dirk, T., et al. *Topical negative pressure for treating chronic wounds*. Cochrane  
738 Database of Systematic Reviews, 2008. DOI: 10.1002/14651858.CD001898.pub2.
- 739 15. Vikatmaa, P., et al., *Negative pressure wound therapy: a systematic review on effectiveness*  
740 *and safety*. Eur J Vasc Endovasc Surg, 2008. **36**(4): p. 438-48.
- 741 16. Armstrong, D.G. and L.A. Lavery, *Negative pressure wound therapy after partial diabetic foot*  
742 *amputation: a multicentre, randomised controlled trial*. Lancet, 2005. **366**(9498): p. 1704-10.
- 743 17. Blume, P.A., et al., *Comparison of negative pressure wound therapy using vacuum-assisted*  
744 *closure with advanced moist wound therapy in the treatment of diabetic foot ulcers: a*  
745 *multicenter randomized controlled trial*. Diabetes Care, 2008. **31**(4): p. 631-6.
- 746 18. Dumville, J.C., et al., *Negative pressure wound therapy for treating foot wounds in people*  
747 *with diabetes mellitus*. Cochrane Database Syst Rev, 2013(10): p. CD010318.
- 748 19. Rhee, S.M., et al., *Negative Pressure Wound Therapy Technologies for Chronic Wound Care in*  
749 *the Home Setting*. 2014, Johns Hopkins University Evidence-based Practice Center: Rockville  
750 (MD).
- 751 20. Canadian Agency for Drugs and Technologies in Health, *Negative Pressure Wound Therapy*  
752 *for Managing Diabetic Foot Ulcers: A Review of the Clinical Effectiveness, Cost-effectiveness,*  
753 *and Guidelines*. 2014: Ottawa (ON).
- 754 21. Liu, S., et al., *Evaluation of negative-pressure wound therapy for patients with diabetic foot*  
755 *ulcers: systematic review and meta-analysis*. Ther Clin Risk Manag, 2017. **13**: p. 533-544.
- 756 22. Liu, Z., et al., *Negative pressure wound therapy for treating foot wounds in people with*  
757 *diabetes mellitus*. Cochrane Database Syst Rev, 2018. **10**: p. CD010318.
- 758 23. Seidel, D., et al., *Negative pressure wound therapy versus standard wound care in chronic*  
759 *diabetic foot wounds: study protocol for a randomized controlled trial*. Trials, 2014. **15**: p.  
760 334.
- 761 24. Bauer, H., et al. *Typ-2-Diabetes: Präventions- und Behandlungsstrategien für*  
762 *Fußkomplikationen*. Nationale Versorgungs Leitlinien, 2010.



- 1  
2  
3 763 25. Ruttermann, M., et al., *Local treatment of chronic wounds: in patients with peripheral*  
4 764 *vascular disease, chronic venous insufficiency, and diabetes*. Dtsch Arztebl Int, 2013. **110**(3):  
5 765 p. 25-31.  
6 766 26. Dupont, W.D. and W.D. Plummer, Jr., *Power and sample size calculations. A review and*  
7 767 *computer program*. Control Clin Trials, 1990. **11**(2): p. 116-28.  
8 768 27. Schaper, N.C., *Diabetic foot ulcer classification system for research purposes: a progress*  
9 769 *report on criteria for including patients in research studies*. Diabetes Metab Res Rev, 2004. **20**  
10 770 **Suppl 1**: p. S90-5.  
11 771 28. Sanders LJ and Frykberg RG, *Diabetic neuropathic osteoarthropathy: the Charcot foot.*, in *The*  
12 772 *high risk foot in diabetes mellitus.*, F. RG, Editor. 1991, Churchill Livingstone: New York. p.  
13 773 297-338.  
14 774 29. Levin, M.E., *Preventing amputation in the patient with diabetes*. Diabetes Care, 1995. **18**(10):  
15 775 p. 1383-94.  
16 776 30. Wagner, F.W., Jr., *The diabetic foot*. Orthopedics, 1987. **10**(1): p. 163-72.  
17 777 31. Rutherford, R.B., et al., *Recommended standards for reports dealing with lower extremity*  
18 778 *ischemia: revised version*. J Vasc Surg, 1997. **26**(3): p. 517-38.  
19 779 32. Widmer, L.K., et al., *[Venous diseases in 1800 employees. Basel Studies II]*. Schweiz Med  
20 780 Wochenschr, 1967. **97**(4): p. 107-10.  
21  
22  
23  
24 781  
25  
26  
27  
28  
29  
30  
31  
32  
33  
34  
35  
36  
37  
38  
39  
40  
41  
42  
43  
44  
45  
46  
47  
48  
49  
50  
51  
52  
53  
54  
55  
56  
57  
58  
59  
60

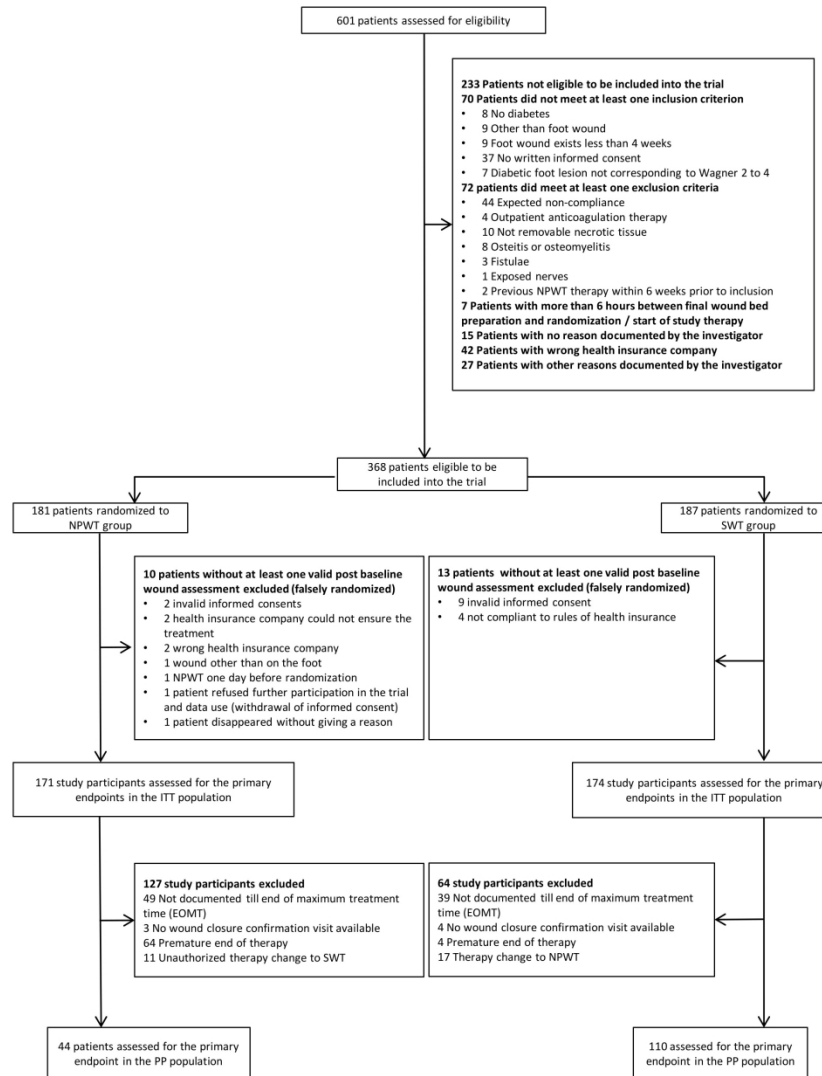

Figure 1: Trial profile (CONSORT Flow Diagram)

190x275mm (300 x 300 DPI)



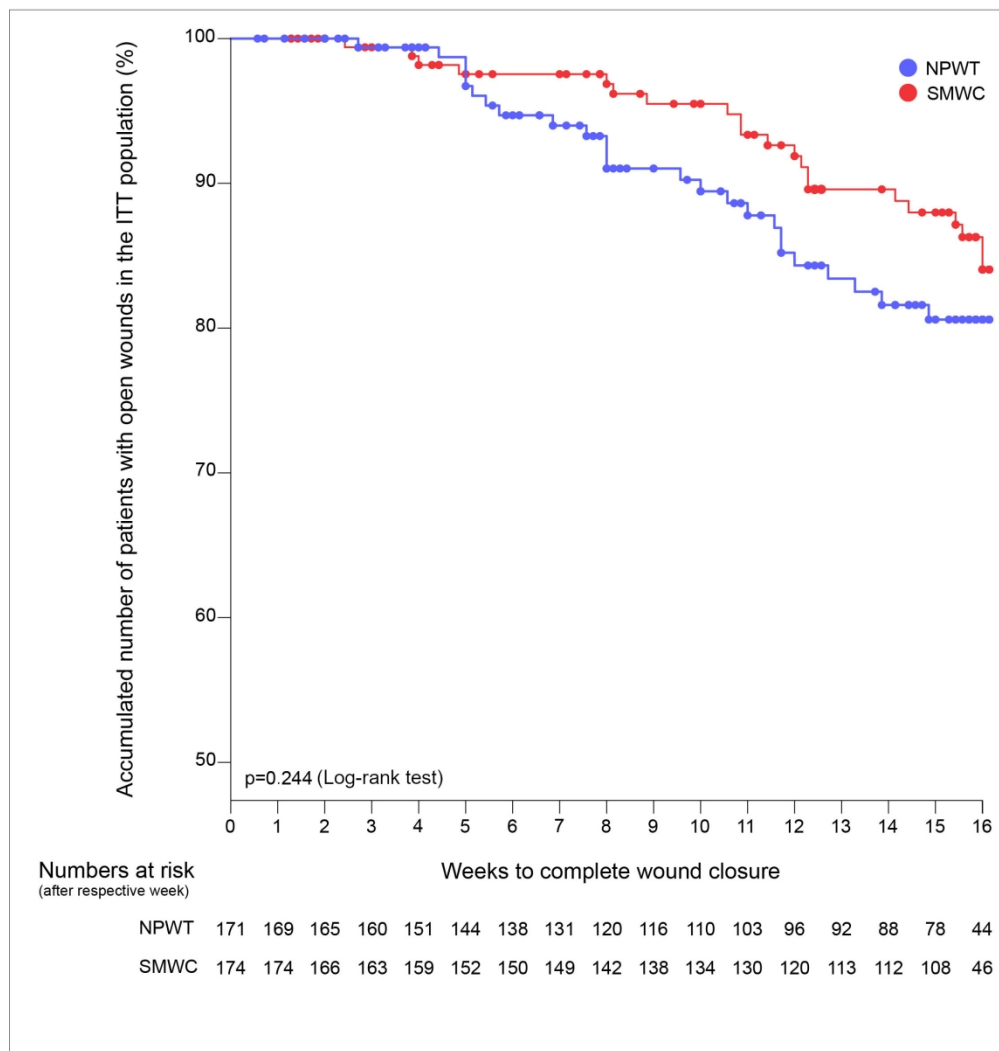

Figure 2: Time until complete, sustained and verified wound closure in the ITT population

189x198mm (300 x 300 DPI)

1  
2  
3  
4  
5  
6  
7  
8  
9  
10  
11  
12  
13  
14  
15  
16  
17  
18  
19  
20  
21  
22  
23  
24  
25  
26  
27  
28  
29  
30  
31  
32  
33  
34  
35  
36  
37  
38  
39  
40  
41  
42  
43  
44  
45  
46  
47  
48  
49  
50  
51  
52  
53  
54  
55  
56  
57  
58  
59  
60

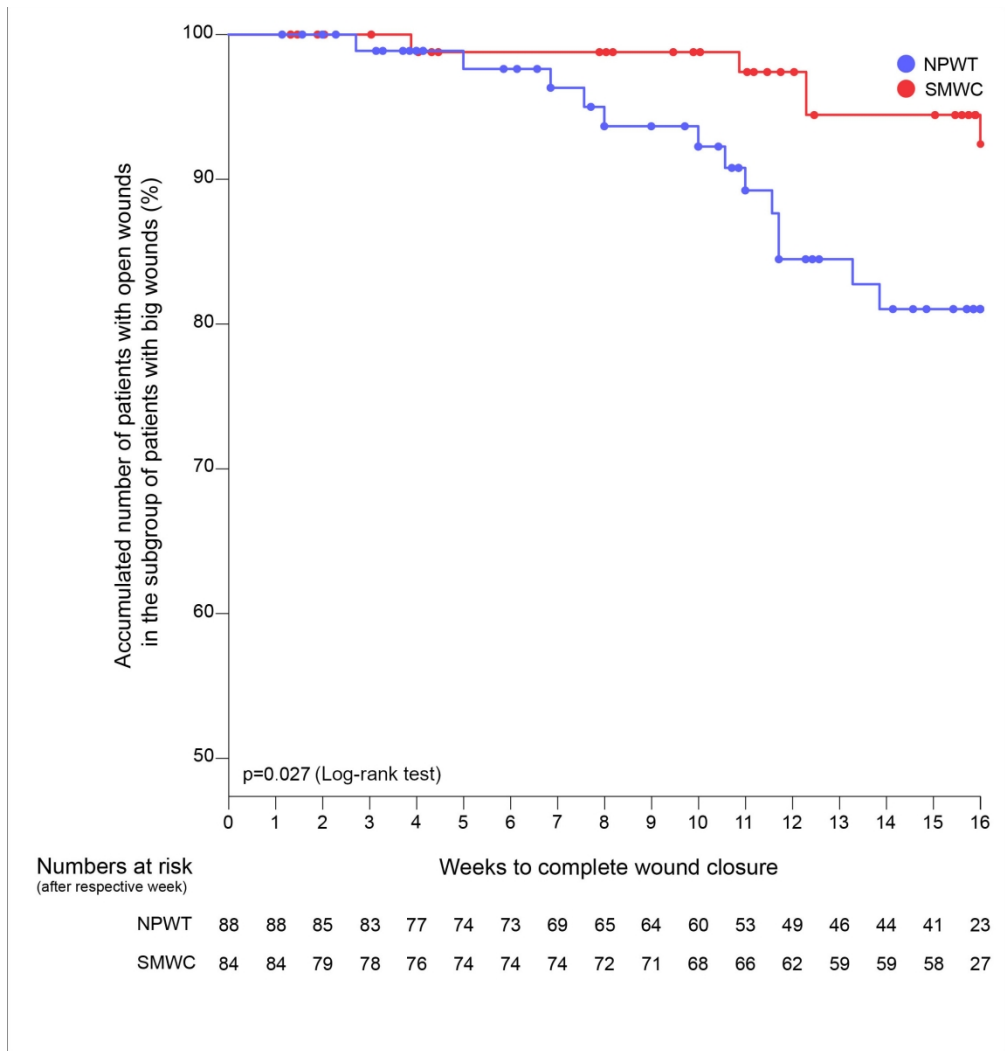

Figure 3: Time until complete, sustained and verified wound closure for the subgroup of big wounds

189x198mm (300 x 300 DPI)

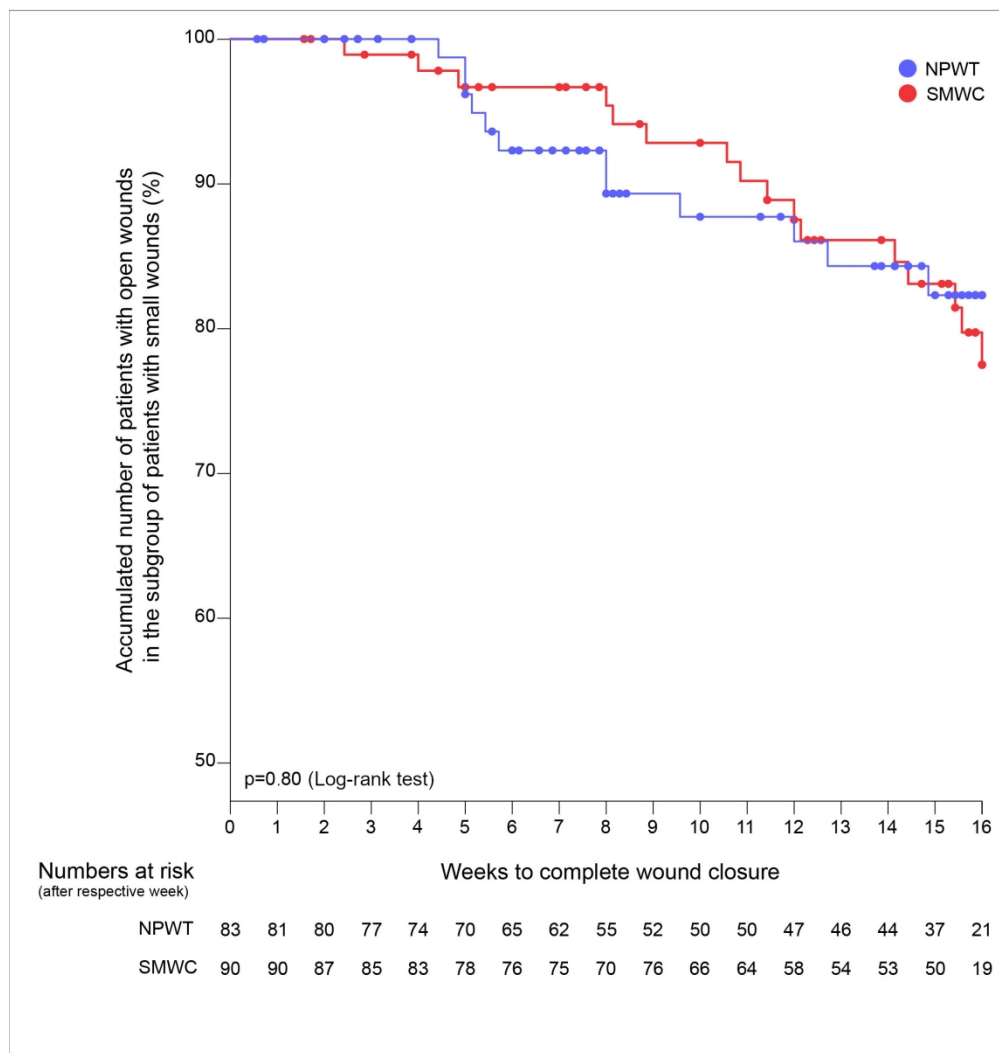

Figure 4: Time until complete, sustained and verified wound closure for the subgroup of small wounds

189x198mm (300 x 300 DPI)

1  
2  
3  
4  
5  
6  
7  
8  
9  
10  
11  
12  
13  
14  
15  
16  
17  
18  
19  
20  
21  
22  
23  
24  
25  
26  
27  
28  
29  
30  
31  
32  
33  
34  
35  
36  
37  
38  
39  
40  
41  
42  
43  
44  
45  
46  
47  
48  
49  
50  
51  
52  
53  
54  
55  
56  
57  
58  
59  
60

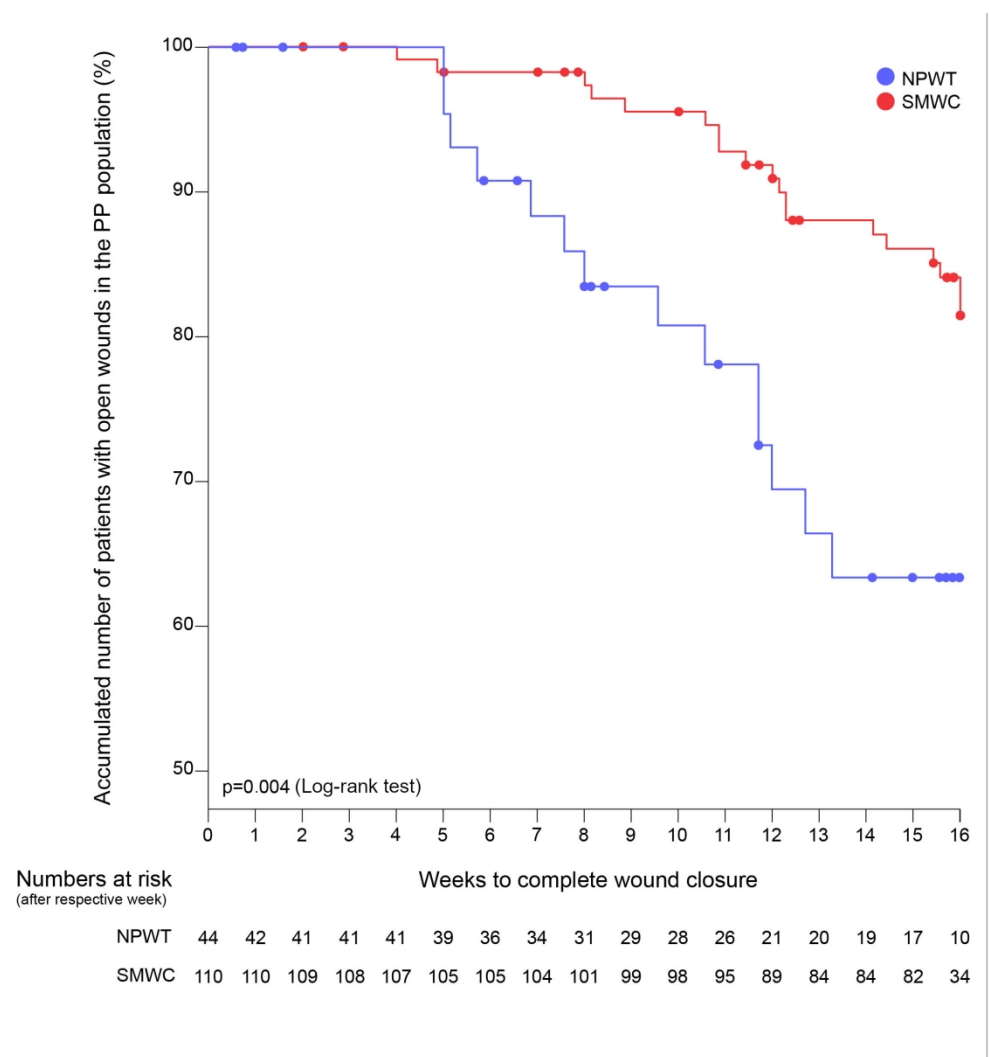

Figure 5: Time until complete, sustained and verified wound closure in the PP-population  
189x198mm (300 x 300 DPI)

## Supplementary Appendix

### Table of contents:

- List of investigators
- Supplementary baseline characteristics for the ITT population
- Supplementary baseline characteristics for the PP population
- Supplementary result tables
- Supplementary discussion

### List of investigators:

|                                      |                                                                                                                   |
|--------------------------------------|-------------------------------------------------------------------------------------------------------------------|
| 1. PD Dr. med. Achim Neufang         | HSK - Dr. Horst Schmidt Kliniken GmbH<br>Klinik für Gefäßchirurgie<br>Ludwig-Erhard-Straße 100<br>65199 Wiesbaden |
| 2. Dr. med. Holger Lawall            | Asklepios Westklinikum Hamburg<br>Zentrum für Gefäßmedizin<br>Suurheid 20<br>22559 Hamburg                        |
| 3. Prof. Dr. med. Gernold<br>Wozniak | Knappschaftskrankenhaus Bottrop<br>Gefäßchirurgische Klinik<br>Osterfelderstraße 157<br>46242 Bottrop             |
| 4. Prof. Dr. med. Martin Storck      | Städtisches Klinikum Karlsruhe<br>Klinik für Gefäß- und Thoraxchirurgie<br>Moltkestraße 90<br>76133 Karlsruhe     |
| 5. Dr. med. Dirk Hochlenert          | Gemeinschaftspraxis Schlotmann-Hochlenert-Zavaleta-Haberstock<br>Merheimer Straße 217<br>50733 Köln               |
| 6. Dr. med. Gudrun Hetzel            | Klinikum Döbeln<br>Abt. für Gefäßchirurgie<br>Sörmitzer Straße 10<br>04720 Döbeln                                 |
| 7. Dr. med. Karsten Jungheim         | Klinikum Bielefeld Mitte<br>Klinik für Allgemeine Innere Medizin<br>Teutoburger Straße 50<br>33604 Bielefeld      |
| 8. Dr. med. Michael Petzold          | Klinikum Frankfurt/Oder<br>Klinik für Gefäßchirurgie                                                              |

|                                         |                                                                                                                                                                       |
|-----------------------------------------|-----------------------------------------------------------------------------------------------------------------------------------------------------------------------|
|                                         | Müllroser Chaussee 7<br>15236 Frankfurt/Oder                                                                                                                          |
| 9. PD Dr. med. Matthias Weck            | Weißeritztal-Kliniken GmbH<br>Medizinische Klinik III<br>Bürgerstraße 7<br>01705 Freital                                                                              |
| 10. Dr. med. Alexandra Zidek            | Krankenhaus Porz am Rhein<br>Klinik für Gefäßchirurgie<br>Urbacher Weg 19<br>51149 Köln                                                                               |
| 11. Dr. med. Peter Mauckner             | St. Remigius Krankenhaus Opladen<br>Innere Medizin<br>An St. Remigius 26<br>51379 Leverkusen                                                                          |
| 12. Dr. med. Klemens M. Sondern         | Marien Hospital Dortmund-Hombruch<br>Klinik für Innere Medizin/Diabetologie<br>Gablonzstraße 9<br>44225 Dortmund                                                      |
| 13. Prof. Dr. med. Thomas Schmitz-Rixen | Universitätsklinikum Frankfurt<br>Zentrum für Chirurgie<br>Klinik für Gefäß- und Endovascularchirurgie<br>Theodor-Stern-Kai 7, Haus 23C/EG<br>60590 Frankfurt am Main |
| 14. Dr. med. Walter Wetzel-Roth         | Facharztpraxis für Chirurgie<br>Hindenburgstraße 1<br>86807 Buchloe                                                                                                   |
| 15. Dr. med. Matthias Hahn              | Helfenstein Klinik Geisslingen<br>Allgemein- und Viszeralchirurgie<br>Eybstraße 16<br>73312 Geislingen/Steige                                                         |
| 16. Dr. med. Karsten Glockemann         | Paracelsus-Klinik am Silbersee<br>Wundzentrum Hannover<br>Oertzeweg 24<br>30851 Langenhagen                                                                           |
| 17. PD Dr. med. Farzin Adili            | Klinikum Darmstadt<br>Chirurgische Klinik III<br>Grafenstraße 9<br>64283 Darmstadt                                                                                    |
| 18. Dr. med. Andreas Riemer             | Ortenau Klinikum Offenburg-Ebertplatz<br>Klinik für Allgemein-, Viszeral- und Gefäßchirurgie<br>Ebertplatz 12                                                         |

|                                             |                                                                                                                                                 |
|---------------------------------------------|-------------------------------------------------------------------------------------------------------------------------------------------------|
|                                             | 77654 Offenburg                                                                                                                                 |
| 19. Dr. med. Thomas Krönert                 | Thüringen-Kliniken "Georgius Agricola" GmbH<br>Klinik für Gefäßchirurgie<br>Rainweg 68<br>07318 Saalfeld/Saale                                  |
| 20. Dr. med. Matthias Holfeld               | Klinikum Dorothea Christiane Erxleben GmbH<br>Klinik für Allgemein-, Viszeral- und Gefäßchirurgie<br>Ditfurter Weg 24<br>06484 Quedlinburg      |
| 21. Prof. Dr. med. Jan Andre' Schmidt-Lucke | Franziskus-Krankenhaus Berlin<br>Abt. für Innere Medizin<br>Budapester Straße 15-19<br>10787 Berlin                                             |
| 22. Dr. med. Wolf-Rüdiger Klare             | Hegau-Bodensee Klinikum Radolfzell (HBK)<br>Klinik für Innere Medizin<br>Hausherrenstraße 12<br>78315 Radolfzell                                |
| 23. Dr. med. Hansjörg Mühlen                | Diabetologische Schwerpunktpraxis Dr. med. Hansjörg Mühlen & Partner<br>Ruhrorter Straße 195<br>47119 Duisburg                                  |
| 24. Dr. med. Christian Reinhold             | Kliniken Maria Hilf Mönchengladbach<br>Klinik für Gefäßchirurgie und Angiologie<br>Sandradstraße 43<br>41061 Mönchengladbach                    |
| 25. Dr. med. Makarios Paschalidis           | Städtisches Klinikum München/Bogenhausen<br>Klinik für Endokrinologie, Diabetologie und Angiologie<br>Englschalkingerstraße 77<br>81925 München |
| 26. Gerhard Rothenaicher                    | Facharztpraxis für Chirurgie<br>Cosimastraße 2<br>81927 München                                                                                 |
| 27. Dr. med. Elke Anne Klug                 | Bürgerhospital Frankfurt am Main<br>Interdisziplinäres Zentrum Diabetischer Fuß (DDG)<br>Nibelungenallee 37- 41<br>60318 Frankfurt am Main      |
| 28. Dr. med. Siamak Pourhassan              | Gemeinschaftspraxis für Chirurgie und Gefäßmedizin<br>Drs. Alter / Pourhassan / Heim<br>Klosterstraße 12<br>46145 Oberhausen                    |

|                                 |                                                                                                                                                                                     |
|---------------------------------|-------------------------------------------------------------------------------------------------------------------------------------------------------------------------------------|
| 29. Dr. med. Jan Theil          | Evangelisches Krankenhaus Königin Elisabeth Herzberge gGmbH<br>Abt. für Kardiologie, Angiologie und Diabetologie<br>Herzbergstraße 79<br>10365 Berlin                               |
| 30. Dr. med. Martin Adolph      | Städtisches Klinikum Neunkirchen gGmbH<br>Abt. für Gefäßchirurgie & Phlebologie<br>Brunnenstraße 20<br>66538 Neunkirchen                                                            |
| 31. Dr. med. Frank von Feldmann | Westküstenklinikum Heide Klinik für Viszeral- und<br>Gefäßchirurgie Esmarchstraße 50<br>25746 Heide/Holstein                                                                        |
| 32. Dr. med. Gerald Engels      | Chir. Praxisgemeinschaft am Bayenthalgürtel<br>Praxis Dr. med. Gerald Engels<br>Bayenthalgürtel 45<br>50968 Köln                                                                    |
| 33. Dr. med. Joachim Oldenburg  | Malteser Krankenhaus – St. Franziskus-Hospital<br>Medizinische Klinik I<br>Abt. für Diabetologie<br>Waldstraße 17<br>24939 Flensburg                                                |
| 34. Dr. med. Philipp Knepe      | St. Marienkrankenhaus Siegen gGmbH<br>Klinik für Gastroenterologie<br>Kampenstraße 51<br>57072 Siegen                                                                               |
| 35. Dr. med. Steffen Hering     | Krankenhaus Bietigheim<br>Klinik für Innere Medizin, Kardiologie, Endokrinologie,<br>Diabetologie und Internistische Intensivmedizin<br>Riedstraße 12<br>74321 Bietigheim-Bissingen |
| 36. Dr. med. Harald Daum        | Asklepios Kliniken Harburg<br>Eißendorfer Pferdeweg 52<br>21075 Hamburg                                                                                                             |
| 37. Dr. med. Lutz Stemler       | Diabetologikum Ludwigshafen<br>Diabetes-Schwerpunktpraxis<br>Ludwigsplatz 9<br>67059 Ludwigshafen                                                                                   |
| 38. Dr. med. Thomas Müller      | Mariannen-Hospital Werl<br>Abt. für Chirurgie<br>Unnaer Straße 15<br>59457 Werl                                                                                                     |



|                           |                                                                                        |
|---------------------------|----------------------------------------------------------------------------------------|
| 39. Dr. med. Karl Zink    | Diabetes Klinik GmbH & Co KG<br>Theodor-Klotzbücher-Straße 12<br>97980 Bad Mergentheim |
| 40. Dr. med. Dirk Lammers | Institut für Diabetesforschung Münster GmbH<br>Hohenzollernring 70<br>48145 Münster    |

Table S1: The table shows all study sites that have included at least one patient into the DiaFu-study.

### Supplementary baseline characteristics for the ITT population

| Baseline parameters<br>(ITT population)           | Total<br>N=345 (100 %) | NPWT<br>N=171 (49·6%) | SMWC<br>N=174 (50·4%) |
|---------------------------------------------------|------------------------|-----------------------|-----------------------|
| Alcohol                                           | N=341                  | N=169                 | N=172                 |
| Occasionally                                      | 157 (46%)              | 83 (48·5%)            | 74 (42·3%)            |
| Chronic                                           | 10 (2·9%)              | 3 (1·8%)              | 7 (4·0%)              |
| No                                                | 174 (51%)              | 83 (48·5%)            | 91 (52%)              |
| Smoking                                           | N=342                  | N=169                 | N=173                 |
| No                                                | 49 (14·3%)             | 25 (14·6%)            | 24 (13·7%)            |
| Yes                                               | 293 (85·7%)            | 144 (84·3%)           | 149 (85·1%)           |
| Number of years                                   |                        |                       |                       |
| Mean (SD)                                         | 34·8 (13·5)            | 36·5 (14·9)           | 33·1 (12·1)           |
| Packs / day                                       |                        |                       |                       |
| Mean                                              | 1·1                    | 1·1                   | 1·2                   |
| Drugs                                             | N=341                  | N=169                 | N=172                 |
| Occasionally                                      | 1 (0·3%)               | 1 (0·6%)              | 0                     |
| Chronic                                           | 2 (0·6%)               | 0                     | 2 (1·1%)              |
| No                                                | 338 (97·7%)            | 168 (98·2%)           | 170 (97·1%)           |
| Allergies                                         | N=343                  | N=170                 | N=173                 |
| Yes                                               | 37 (10·7%)             | 16 (9·4%)             | 21 (12·0%)            |
| No                                                | 306 (88·4%)            | 154 (90·1%)           | 152 (86·9%)           |
| Subjective assessment of nutritional condition    | N=342                  | N=169                 | N=173                 |
| Well-nourished                                    | 325 (94·2%)            | 162 (94·7%)           | 163 (93·7%)           |
| Moderately malnourished or suspected malnutrition | 11 (3·2%)              | 4 (2·3%)              | 7 (4%)                |

|              |        |        |        |
|--------------|--------|--------|--------|
| Malnourished | 0 (0%) | 0 (0%) | 0 (0%) |
|--------------|--------|--------|--------|

Table S2: The table shows baseline characteristics of the ITT- population. Data are Number (N) and Percentage (%), or Mean and Standard Deviation (SD). "N=" is stating the number of patients with actual available information.

### Supplementary baseline characteristics for the PP population

| <b>Demographic and baseline parameters (PP-Population)</b> | <b>Total<br/>N=154 (100%)</b> | <b>NPWT<br/>N=44<br/>(28.6%)</b> | <b>SMWC<br/>N=110<br/>(71.4%)</b> |
|------------------------------------------------------------|-------------------------------|----------------------------------|-----------------------------------|
| Sex                                                        | N=154                         | N=44                             | N=110                             |
| Male                                                       | 113 (73.4%)                   | 29 (65.9%)                       | 84 (76.4%)                        |
| Female                                                     | 41 (26.6%)                    | 15 (34.1%)                       | 26 (23.6%)                        |
| Age in years                                               | N=154                         | N=44                             | N=110                             |
| Mean (SD)                                                  | 67.4 (10.6)                   | 66.5 (11.0)                      | 67.8 (10.4)                       |
| Height in cm                                               | N=153                         | N=43                             | N=110                             |
| Mean (SD)                                                  | 173.8 (12.9)                  | 173.5 (17.4)                     | 174.0 (10.7)                      |
| Weight in kg                                               | N=150                         | N=42                             | N=108                             |
| Mean (SD)                                                  | 95.4 (23.3)                   | 96.2 (21.6)                      | 95.1 (24.0)                       |
| Alcohol                                                    | N=153                         | N=44                             | N=109                             |
| Occasionally                                               | 71 (46.4%)                    | 22 (50.0%)                       | 49 (45.0%)                        |
| Chronic                                                    | 3 (2.0%)                      | 1 (2.3%)                         | 2 (1.8%)                          |
| No                                                         | 79 (51.6%)                    | 21 (47.7%)                       | 58 (53.2%)                        |
| Smoking                                                    | N=154                         | N=44                             | N=110                             |
| No                                                         | 16 (10.4%)                    | 2 (4.5%)                         | 14 (12.7%)                        |
| Yes                                                        | 138 (89.6%)                   | 42 (95.5%)                       | 96 (87.3%)                        |
| Number of years (Mean (SD))                                | 37.0 (9.2)                    | 42.0 (2.8)                       | 36.3 (9.7)                        |
| Packs / day (Mean)                                         | 1.0                           | 1.0                              | 1.0                               |
| Drugs                                                      | N=153                         | N=44                             | N=109                             |
| Occasionally                                               | 0 (0%)                        | 0 (0%)                           | 0 (0%)                            |
| Chronic                                                    | 1 (0.7%)                      | 0 (0%)                           | 1 (0.9%)                          |
| No                                                         | 152 (99.3%)                   | 44 (100%)                        | 108 (99.1%)                       |
| Requiring dialysis                                         | N=154                         | N=44                             | N=110                             |
| Yes                                                        | 11 (7.1%)                     | 2 (4.5%)                         | 9 (8.2%)                          |
| No                                                         | 143 (92.9%)                   | 42 (95.5%)                       | 101 (91.8%)                       |

|                                                                                                      |               |                 |               |
|------------------------------------------------------------------------------------------------------|---------------|-----------------|---------------|
| Allergies                                                                                            | N=154         | N=44            | N=110         |
| Yes                                                                                                  | 16 (10.4%)    | 6 (13.6%)       | 10 (9.1%)     |
| No                                                                                                   | 138 (89.6%)   | 38 (86.4%)      | 100 (90.9%)   |
| Subjective assessment of nutritional condition                                                       | N=150         | N=43            | N=107         |
| Well-nourished                                                                                       | 147 (98.0%)   | 42 (97.7%)      | 105 (98.1%)   |
| Moderately malnourished or suspected malnutrition                                                    | 3 (2.0%)      | 1 (2.3%)        | 2 (1.9%)      |
| Malnourished                                                                                         | 0 (0%)        | 0 (0%)          | 0 (0%)        |
| Peripheral arterial occlusive disease (PAOD)                                                         | N=109 (70.8%) | N=29<br>(65.9%) | N=80 (72.7%)  |
| without critical limb ischemia                                                                       | 103 (94.5%)   | 28 (96.6%)      | 75 (93.8%)    |
| with critical limb ischemia                                                                          | 6 (5.5%)      | 1 (3.4%)        | 5 (6.3%)      |
| Rutherford classification for chronic limb ischemia<br>(Grade/Category)                              | N=109         | N=29            | N=80          |
| 0/0 Asymptomatic—no hemodynamically significant occlusive disease                                    | 13 (11.9%)    | 4 (13.8%)       | 9 (11.3%)     |
| I/1 Mild claudication                                                                                | 13 (11.9%)    | 2 (6.9%)        | 11 (13.8%)    |
| I/2 Moderate claudication                                                                            | 8 (7.3%)      | 0 (0.0%)        | 8 (10.0%)     |
| I/3 Severe claudication                                                                              | 4 (3.7%)      | 1 (3.4%)        | 3 (3.8%)      |
| II/4 Ischemic rest pain                                                                              | 1 (0.9%)      | 1 (3.4%)        | 0 (0%)        |
| III/5 Minor tissue loss—non healing ulcer, focal gangrene with diffuse pedal ischemia                | 67 (61.5%)    | 21 (72.4%)      | 46 (57.5%)    |
| III/6 Major tissue loss—extending above transmetatarsal level, functional foot no longer salvageable | 3 (2.8%)      | 0 (0.0%)        | 3 (3.8%)      |
| Revascularisation before study start                                                                 | N=9 (5.8%)    | N=1 (2.3%)      | N=8 (7.3%)    |
| Percutaneous transluminal angioplasty (PTA)                                                          | 5 (55.6%)     | 0 (0.0%)        | 5 (62.5%)     |
| PTA + Stent                                                                                          | 0 (0%)        | 0 (0%)          | 0 (0%)        |
| Veins-Bypass                                                                                         | 1 (11.1%)     | 1 (100.0%)      | 0 (11.1%)     |
| Polytetrafluoroethylene (PTFE) Bypass                                                                | 1 (11.1%)     | 0 (0%)          | 1 (12.5%)     |
| Thromboendarterectomy and patch plastic                                                              | 2 (22.2%)     | 0 (0%)          | 2 (25.0%)     |
| Revascularization with influence on the wound                                                        | 9 of 9 (100%) | 1 of 1 (100%)   | 0 of 8 (100%) |
| Sufficient revascularization result                                                                  | 9 of 9 (100%) | 1 of 1 (100%)   | 8 of 8 (100%) |
| Insufficient revascularization result                                                                | 0 of 9 (0%)   | 0 of 1 (0%)     | 0 of 8 (0%)   |
| Revascularization result not assessable                                                              | 0 of 9 (0%)   | 0 of 1 (0%)     | 0 of 8 (0%)   |

Table S3: Patient demographics and baseline characteristics of the Per-Protocol (PP) population. Data are N (%) and Mean (SD). "N=" is stating the number of patients with actual available information. Findings, diagnoses and procedures documented by the investigators are presented.

### Supplementary result tables

| Observation time point | Wound surface NPWT                                         |                               | Wound surface SMWC                                         |                               |
|------------------------|------------------------------------------------------------|-------------------------------|------------------------------------------------------------|-------------------------------|
|                        | Calculated from width and length (according to eCRF entry) | Results of the photo analysis | Calculated from width and length (according to eCRF entry) | Results of the photo analysis |
| Randomization          | 1060 (1536)                                                | 687 (879)                     | 1141 (3247)                                                | 664 (1050)                    |
|                        | 550 (1236)                                                 | 321 (760)                     | 471 (1007)                                                 | 316 (658)                     |
|                        | N=171 (2)                                                  | N=118 (10)                    | N=174 (0)                                                  | N=129 (13)                    |
| Week 1                 | 847 (1489)                                                 | 643 (820)                     | 1085 (3234)                                                | 713 (1065)                    |
|                        | 397 (801)                                                  | 329 (750)                     | 395 (867)                                                  | 307 (749)                     |
|                        | N=171 (15)                                                 | N=118 (32)                    | N=174 (25)                                                 | N=129 (36)                    |
| Week 3                 | 810 (1472)                                                 | 590 (742)                     | 1025 (3242)                                                | 701 (1212)                    |
|                        | 314 (860)                                                  | 273 (633)                     | 390 (913)                                                  | 266 (768)                     |
|                        | N=171 (24)                                                 | N=118 (28)                    | N=174 (22)                                                 | N=129 (35)                    |
| Week 5                 | 717 (1379)                                                 | 607 (828)                     | 759 (1466)                                                 | 610 (1119)                    |
|                        | 275 (769)                                                  | 231 (843)                     | 267 (824)                                                  | 219 (635)                     |
|                        | N=171 (37)                                                 | N=118 (42)                    | N=174 (41)                                                 | N=129 (38)                    |
| Week 8                 | 636 (1322)                                                 | 495 (770)                     | 674 (1410)                                                 | 501 (937)                     |
|                        | 220 (712)                                                  | 182 (561)                     | 186 (783)                                                  | 165 (481)                     |
|                        | N=171 (52)                                                 | N=118 (48)                    | N=174 (42)                                                 | N=129 (42)                    |
| Week 12                | 549 (858)                                                  | 457 (742)                     | 570 (940)                                                  | 493 (950)                     |
|                        | 165 (964)                                                  | 134 (494)                     | 169 (632)                                                  | 133 (498)                     |
|                        | N=171 (110)                                                | N=118 (88)                    | N=174 (124)                                                | N=129 (104)                   |
| Week 16                | 440 (810)                                                  | 334 (649)                     | 493 (1095)                                                 | 351 (750)                     |
|                        | 79 (471)                                                   | 114 (363)                     | 69 (415)                                                   | 77 (320)                      |
|                        | N=171 (80)                                                 | N=118 (66)                    | N=174 (63)                                                 | N=129 (56)                    |

Table S4: Wound surface area at each observation time point in the ITT population. Wound surface area at each observation time point until end of maximum study treatment time of 16 weeks is separately shown for the calculated data from width and length as documented in the eCRF and for the data derived from the photo analysis. An elliptical wound surface area has been calculated from the documented width and length (eCRF) [ $(\pi / 4) \times \text{length} \times \text{width} = \text{area}$ ]. Data show mean (SD) and median (IQR) as well the number (N) of values analyzed for the ITT population (number (N) of values substituted by the last observation carried forward (LOCF) method).

| Observation time point | Wound volume NPWT (mm <sup>3</sup> )       | Wound volume SMWC (mm <sup>3</sup> )        |
|------------------------|--------------------------------------------|---------------------------------------------|
| Randomization          | 22498 (58930)<br>4710 (15048)<br>N=171 (2) | 21740 (74181)<br>4759 (12888)<br>N=174 (0)  |
| Week 1                 | 13203 (28709)<br>2487 (6908)<br>N=171 (15) | 19979 (73143)<br>3533 (11407)<br>N=174 (26) |
| Week 3                 | 10708 (28521)<br>1884 (6857)<br>N=171 (24) | 16217 (67494)<br>2293 (8831)<br>N=174 (23)  |
| Week 5                 | 7700 (19719)<br>1166 (5338)<br>N=171 (37)  | 11286 (32566)<br>1365 (7539)<br>N=174 (42)  |
| Week 8                 | 5592 (11535)<br>785 (4604)<br>N=171 (78)   | 8772 (27674)<br>812 (5258)<br>N=174 (67)    |
| Week 12                | 5333 (12422)<br>565 (3913)<br>N=171 (119)  | 6639 (16454)<br>625 (4083)<br>N=174 (133)   |
| Week 16                | 3880 (10534)<br>141 (1890)<br>N=171 (83)   | 5465 (14874)<br>200 (1587)<br>N=174 (64)    |

Table S5: Wound volume at each observation time point during the study treatment time of maximum 16 weeks in the ITT population. Wound volume (length x width x depth) was calculated from width, length and depth as documented in the eCRF. Data show mean (SD) and median (IQR) as well the number (N) of values analyzed for the ITT population (number (N) of values substituted by the last observation carried forward (LOCF) method).

| Observation<br>time point | NPWT Granulation |          | NPWT Fibrin |          | NPWT Necrosis |          | SMWC Granulation |           | SMWC Fibrin |          | SMWC Necrosis |          |
|---------------------------|------------------|----------|-------------|----------|---------------|----------|------------------|-----------|-------------|----------|---------------|----------|
|                           | eCRF             | W.H.A.T. | eCRF        | W.H.A.T. | eCRF          | W.H.A.T. | eCRF             | W.H.A.T.  | eCRF        | W.H.A.T. | eCRF          | W.H.A.T. |
| Rando                     | 34 (36)          | 22 (25)  | 21 (28)     | 71 (27)  | 3 (10)        | 7 (15)   | 34 (37)          | 24 (26)   | 22 (29)     | 69 (28)  | 2 (9)         | 7 (14)   |
|                           | 20 (70)          | 12 (37)  | 10 (30)     | 79 (46)  | 0 (0)         | 0 (5)    | 20 (71)          | 14 (39)   | 10 (40)     | 79 (44)  | 0 (0)         | 0 (8)    |
|                           | 171 (2)          | 118 (8)  | 170 (4)     | 118 (8)  | 169 (5)       | 118 (8)  | 174 (3)          | 129 (12)  | 174 (1)     | 129 (12) | 172 (2)       | 129 (12) |
| Week 1                    | 58 (35)          | 21 (25)  | 19 (22)     | 73 (27)  | 5 (13)        | 6 (12)   | 49 (35)          | 21 (25)   | 24 (27)     | 74 (26)  | 6 (15)        | 5 (9)    |
|                           | 70 (70)          | 10 (36)  | 10 (30)     | 81 (47)  | 0 (2)         | 0 (5)    | 50 (70)          | 10 (36)   | 15 (31)     | 85 (40)  | 0 (5)         | 0 (5)    |
|                           | 171 (16)         | 118 (32) | 71 (19)     | 118 (32) | 169 (23)      | 118 (32) | 174 (28)         | 129 (36)  | 174 (27)    | 129 (36) | 172 (30)      | 129 (36) |
| Week 3                    | 67 (31)          | 16 (23)  | 18 (22)     | 80 (25)  | 5 (13)        | 4 (11)   | 57 (32)          | 21 (25)   | 25 (26)     | 77 (25)  | 5 (13)        | 3 (7)    |
|                           | 80 (55)          | 5 (25)   | 10 (30)     | 91 (30)  | 0 (0)         | 0 (1)    | 60 (60)          | 10 (36)   | 20 (35)     | 85 (36)  | 0 (3)         | 0 (1)    |
|                           | 171 (26)         | 118 (27) | 171 (30)    | 118 (27) | 169 (28)      | 118 (27) | 174 (24)         | 129 (35)  | 174 (25)    | 129 (35) | 172 (30)      | 129 (35) |
| Week 5                    | 70 (30)          | 15 (22)  | 18 (24)     | 83 (22)  | 4 (13)        | 2 (8)    | 62 (31)          | 18 (26)   | 23 (25)     | 80 (26)  | 4 (12)        | 3 (10)   |
|                           | 80 (45)          | 6 (21)   | 10 (25)     | 91 (26)  | 0 (0)         | 0 (1)    | 63 (50)          | 4 (32)    | 10 (39)     | 93 834   | 0 (0)         | 0 (0)    |
|                           | 171 (36)         | 118 (43) | 171 (38)    | 118 (43) | 169 (42)      | 118 (43) | 174 (44)         | 129 (36)  | 174 (47)    | 129 (36) | 172 (46)      | 129 (36) |
| Week 8                    | 74 (30)          | 16 (23)  | 17 (24)     | 82 (24)  | 4 (13)        | 2 (6)    | 70 (29)          | 17 (24)   | 17 (21)     | 80 (25)  | 5 (13)        | 3 (11)   |
|                           | 90 (40)          | 4 (27)   | 10 (20)     | 93 (33)  | 0 (0)         | 0 (0)    | 80 (40)          | 3 (33)    | 10 (20)     | 92 (36)  | 0 (0)         | 0 (0)    |
|                           | 171 (53)         | 118 (48) | 171 (56)    | 118 (48) | 171 (59)      | 118 (48) | 174 (44)         | 129 (43)  | 174 (49)    | 129 (43) | 174 (52)      | 129 (43) |
| Week 12                   | 75 (30)          | 15 (23)  | 17 (25)     | 83 (24)  | 4 (13)        | 1 (5)    | 73 (29)          | 16 (23)   | 16 (20)     | 82 (23)  | 5 (13)        | 2 (6)    |
|                           | 90 (40)          | 4 (22)   | 5 (20)      | 96 (23)  | 0 (0)         | 0 (0)    | 80 (38)          | 3 (29)    | 10 (20)     | 93 (32)  | 0 (0)         | 0 (0)    |
|                           | 171(115)         | 118 (89) | 171(118)    | 118 (89) | 171(119)      | 118 (89) | 174(124)         | 129(102)  | 174(125)    | 129(102) | 172(126)      | 129(102) |
| Week 16                   | 77 (30)          | 13 (22)  | 14 (22)     | 86 (24)  | 3 (10)        | 1 (6)    | 76 (30)          | 17 (24)   | 15 (24)     | 81 (24)  | 3 (13)        | 2 (6)    |
|                           | 90 (40)          | 1 (17)   | 2 (20)      | 98 (19)  | 0 (0)         | 0 (0)    | 90 (40)          | 4 (31)    | 5 (20)      | 93 (35)  | 0 (0)         | 0 (0)    |
|                           | 171 (78)         | 118 (66) | 171 (79)    | 118 (66) | 171 (82)      | 118 (66) | 174 (62)         | 129 (576) | 174 (65)    | 129 (56) | 174 (66)      | 129 (56) |

1  
2 Table S6: Wound tissue composition at each observation time point during the study treatment time of maximum 16 week in the ITTpopulation. Wound tissue (granulation, fibrin, and necrosis) is  
3 separately shown for the data documented in the eCRF and for the data derived from the photo analysis using the Wound Healing Analyzing Tool (W.H.A.T.). Data show mean (SD) and median  
4 (IQR) as well the number (N) of values analyzed for the ITT population (number (N) of values substituted by the last observation carried forward (LOCF) method).  
5  
6  
7  
8  
9  
10  
11  
12  
13  
14  
15  
16  
17  
18  
19  
20  
21  
22  
23  
24  
25  
26  
27  
28  
29  
30  
31  
32  
33  
34  
35  
36  
37  
38  
39  
40  
41  
42  
43  
44  
45  
46

For peer review only

| Observation time point | Pain Total<br>N=344               | Pain NPWT<br>N=171               | Pain SMWC<br>N=173               |
|------------------------|-----------------------------------|----------------------------------|----------------------------------|
| Screening              | 2.1 (2.4)<br>1 (4)<br>N=344 (0)   | 2.1 (2.3)<br>1 (4)<br>N=171 (0)  | 2.1 (2.4)<br>1 (4)<br>N=173 (0)  |
| Week 1                 | 1.7 (2.2)<br>1 (3)<br>N=344 (6)   | 1.6 (2.2)<br>0 (2)<br>N=171 (1)  | 1.8 (2.2)<br>1 (3)<br>N=173 (5)  |
| Week 3                 | 1.5 (2.0)<br>1 (2)<br>N=344 (27)  | 1.3 (1.9)<br>0 (2)<br>N=171 (11) | 1.7 (2.1)<br>1 (3)<br>N=173 (16) |
| Week 5                 | 1.3 (1.9)<br>0 (2)<br>N=344 (45)  | 1.2 (1.9)<br>0 (2)<br>N=171 (21) | 1.4 (2.0)<br>0 (2)<br>N=173 (24) |
| Week 8                 | 1.3 (1.9)<br>0 (2)<br>N=344 (70)  | 1.2 (1.9)<br>0 (2)<br>N=171 (38) | 1.3 (1.9)<br>0 (2)<br>N=173 (32) |
| Week 12                | 1.1 (1.8)<br>0 (2)<br>N=344 (115) | 1.2 (1.9)<br>0 (2)<br>N=171 (64) | 1.1 (1.8)<br>0 (2)<br>N=173 (51) |
| Week 16                | 1.0 (1.7)<br>0 (1)<br>N=344 (129) | 1.0 (1.7)<br>0 (2)<br>N=171 (76) | 0.9 (1.7)<br>0 (1)<br>N=173 (53) |

Table S7: Pain in the course of the study treatment time of maximum 16 weeks in the ITT-population. Pain evaluation at the pre-defined observation time points during the active study treatment time of 16 weeks in the ITT population. Data show mean (SD) and median (IQR) as well the number (N) of values analyzed for the ITT population (number (N) of values substituted by the last observation carried forward (LOCF) method).

| Observation time point | EQ5D NPWT                              | EQ5D SMWC                               |
|------------------------|----------------------------------------|-----------------------------------------|
| Screening              | 0,53 (0,27)<br>0,53 (0,2)<br>N=156 (2) | 0,53 (0,24)<br>0,53 (0,18)<br>N=159 (3) |
| End of therapy         | 0,67 (0,24)<br>0,77 (0,29)<br>N=62 (2) | 0,72 (0,17)<br>0,66 (0,35)<br>N=13 (0)  |



|                                     |             |             |
|-------------------------------------|-------------|-------------|
| End of maximum study treatment time | 0,66 (0,22) | 0,61 (0,25) |
|                                     | 0,66 (0,28) | 0,63 (0,24) |
|                                     | N=63 (2)    | N=95 (2)    |
| Follow up after 6 months            | 0,69 (0,26) | 0,67 (0,23) |
|                                     | 0,77 (0,35) | 0,63 (0,39) |
|                                     | N=93 (3)    | N=97 (2)    |

Table S8: Quality of life (EQ5D) in the course of the study treatment time of 16 week in the ITT-population. Quality of life evaluated with the EQ5D instrument at the pre-defined observation time points during the active study treatment time of 16 weeks in the ITT-population. Data show mean (SD) and median (IQR) as well the number (N) of values analyzed for the ITT population (number (N) of values substituted by the last observation carried forward (LOCF) method).

| <b>Adverse Events (AE)</b>                         | <b>Total<br/>N=269</b> | <b>NPWT<br/>N=167</b> | <b>SMWC<br/>N=102</b> |
|----------------------------------------------------|------------------------|-----------------------|-----------------------|
| Day of occurrence (N <sub>available</sub> )        | 269                    | 167                   | 102                   |
| Mean (SD)                                          | 39·5 (28·9)            | 37·5 (28·6)           | 42·7 (29·2)           |
| Median (IQR)                                       | 34·0 (42)              | 30·0 (40·0)           | 38·0 (50·0)           |
| Duration in days (N <sub>available</sub> )         | 254                    | 157                   | 97                    |
| Mean (SD)                                          | 21·9 (33·0)            | 19·7 (29·0)           | 25·3 (38·6)           |
| Median (IQR)                                       | 11·0 (21)              | 10·0 (20·0)           | 13·0 (22·0)           |
| Severity (N <sub>available</sub> )                 | 263                    | 161                   | 102                   |
| Mild                                               | 88 (33·5%)             | 64 (39·8%)            | 24 (23·5%)            |
| Moderate                                           | 92 (35·0%)             | 54 (33·5%)            | 38 (37·3%)            |
| Severe                                             | 83 (31·6%)             | 43 (26·7%)            | 40 (39·2%)            |
| AE expected / unexpected (N <sub>available</sub> ) | 259                    | 159                   | 100                   |
| Expected                                           | 79 (30·5%)             | 52 (32·7%)            | 27 (27·0%)            |
| Unexpected                                         | 180 (69·5%)            | 107 (67·3%)           | 73 (73·0%)            |
| Action taken (N <sub>available</sub> )             | 240                    | 146                   | 94                    |
| No                                                 | 46 (19·2%)             | 23 (15·8%)            | 23 (24·5%)            |
| Yes                                                | 194 (80·8%)            | 123 (84·2%)           | 71 (75·5%)            |
| Cessation of therapy                               | 10 of 194 (5·2%)       | 10 of 123 (8·1%)      | 0 of 71 (0%)          |
| Temporary interruption of therapy                  | 30 of 194 (15·5%)      | 28 of 123 (22·8%)     | 2 of 71 (2·8%)        |
| Adaptation of therapy / treatment                  | 100 of 194 (51·5%)     | 52 of 123 (42·3%)     | 48 of 71 (67·6%)      |
| Other                                              | 54 of 194 (27·8%)      | 33 of 123 (26·8%)     | 21 of 71 (29·6%)      |
| Outcome (N <sub>available</sub> )                  | 244                    | 148                   | 96                    |
| Fixed without consequences                         | 115 (47·1%)            | 72 (48·6%)            | 43 (44·8%)            |
| Condition improved                                 | 58 (23·8%)             | 32 (21·6%)            | 26 (27·1%)            |
| Fixed with consequences                            | 34 (13·9%)             | 22 (14·9%)            | 12 (12·5%)            |
| Not fixed                                          | 7 (2·9%)               | 4 (2·7%)              | 3 (3·1%)              |
| Death                                              | 15 (6·1%)              | 9 (6·1%)              | 6 (6·3%)              |
| Unknown                                            | 15 (6·1%)              | 9 (6·1%)              | 6 (6·3%)              |

Table S9: The table shows details on the adverse events (AEs) documented during the active study treatment time of 112 days after randomization. Data are Number (N) and Percentage (%), Mean and Standard Deviation (SD), and Median and Interquartile Range (IQR).

| Wound surface area | Small wounds    |                |              |              | Big wounds |                |                |                |       |
|--------------------|-----------------|----------------|--------------|--------------|------------|----------------|----------------|----------------|-------|
|                    | mm <sup>2</sup> | Total<br>N=173 | NPWT<br>N=83 | SMWC<br>N=90 | p          | Total<br>N=172 | NPWT<br>N=88   | SMWC<br>N=84   | p     |
| N (LOCF)           | 2               | 2              | 0            | 0            | 0.232      | 0              | 0              | 0              | 0.193 |
| Mean (SD)          | 213             | 212            | 213          |              |            | 1995           | 1860           | 2135           |       |
| Median (IQR)       | (136)           | (138)          | (135)        |              |            | (3377)         | (1805)         | (4474)         |       |
| Min - Max          | 188<br>(220)    | 176<br>(220)   | 196<br>(222) |              |            | 1276<br>(1482) | 1364<br>(1242) | 1242<br>(1708) |       |
|                    | 12-484          | 20-484         | 12-471       |              |            | 491-40773      | 520-13188      | 491-40773      |       |

Table S10: Wound surface area for small and big wounds. Data show the number (N) of participants available for the analysis in total and for both treatment arms, the number (N) of values substituted by the last observation carried forward (LOCF) method; mean (SD), median (IQR); and minimum (min) and maximum (max).

| Wound closure rate                           | NPWT (N=171) | SMWC (N=174) | p    |
|----------------------------------------------|--------------|--------------|------|
| <b>Small wounds</b>                          | <b>N=83</b>  | <b>N=90</b>  |      |
| Within 16 weeks maximum study treatment time | 12 (14.5 %)  | 16 (17.8 %)  | 0.6  |
| At follow up after 6 months                  | 13 (15.7 %)  | 24 (26.7 %)  | 0.10 |

Table S11: Wound closure rates within the maximum study treatment time of 16 weeks and within the study observation time of 6 months for small wounds. Data show the number (N) of participants available for the analysis in total and for both treatment arms and the number of patients with wound closure (N) within 16 weeks and after 6 months as well the percentage (%) of patients achieving the endpoints within both treatment arms.

| Wound closure rate                           | NPWT (N=171) | SMWC (N=174) | P    |
|----------------------------------------------|--------------|--------------|------|
| <b>Big wounds</b>                            | <b>N=88</b>  | <b>N=84</b>  |      |
| Within 16 weeks maximum study treatment time | 13 (14.8 %)  | 5 (6.0 %)    | 0.08 |
| At follow up after 6 months                  | 11 (12.5 %)  | 12 (14.3 %)  | 0.82 |

Table S12: Wound closure rates within the maximum study treatment time of 16 weeks and within the study observation time of 6 months for big wounds. Data show the number (N) of participants available for the analysis in total and for both treatment arms and the number of patients with wound closure (N) within 16 weeks and after 6 months as well the percentage (%) of patients achieving the endpoints within both treatment arms.

| <b>Time until min. 95 % granulation tissue for small wounds</b> | <b>Total (N=100)</b> | <b>NPWT (N=52)</b> | <b>SMWC (N=48)</b> | <b>p</b> |
|-----------------------------------------------------------------|----------------------|--------------------|--------------------|----------|
| Mean (SD)                                                       | 38·6 (37·4)          | 28·5 (30·0)        | 49·5 (41·6)        | 0·005    |
| Median (IQR)                                                    | 26·5 (50·0)          | 20·0 (28·0)        | 48·0 (79·0)        |          |
| Min-Max                                                         | 0-114                | 0-113              | 0-114              |          |

Table S13: Time until optimal preparation of the wound bed (min. 95 % granulation tissue) for the subgroup of small wounds. Data show the number (N) of participants available for the analysis in total and for both treatment arms; mean (SD); median (IQR); and minimum (min) and maximum (max).

| <b>Time until min 95 % granulation tissue for big wounds</b> | <b>Total (N=80)</b> | <b>NPWT (N=47)</b> | <b>SMWC (N=33)</b> | <b>p</b> |
|--------------------------------------------------------------|---------------------|--------------------|--------------------|----------|
| Mean (SD)                                                    | 47·8 (40·8)         | 43·4 (37·9)        | 54·0 (44·6)        | 0·27     |
| Median (IQR)                                                 | 36·5 (70·0)         | 35·0 (61·0)        | 56·0 (105·0)       |          |
| Min-Max                                                      | 0-127               | 0-127              | 0-115              |          |

Table S14: Time until optimal preparation of the wound bed (min 95 % granulation tissue) for the subgroup of big wounds. Data show the number (N) of participants available for the analysis in total and for both treatment arms; mean (SD); median (IQR); and minimum (min) and maximum (max).

| <b>Amputations &amp; Resections</b>                    | <b>Total</b> | <b>NPWT</b> | <b>SMWC</b> | <b>p</b> |
|--------------------------------------------------------|--------------|-------------|-------------|----------|
| <b>Small wounds</b>                                    | <b>N=173</b> | <b>N=83</b> | <b>N=90</b> |          |
| No. of patients with amputations or resections [N (%)] | 35 (20·2%)   | 19 (22·9%)  | 16 (17·8%)  | 0·45 (F) |
| No. of performed amputations and resections [N]        | 50           | 22          | 28          | 0·51 (U) |
| No. of patients with minor amputations [N (%)]         | 35 (20·2%)   | 19 (22·9%)  | 16 (17·8%)  | 0·45 (F) |
| No. of patients with major amputations [N (%)]         | 0 (0%)       | 0 (0%)      | 0 (0%)      | -        |

Table S15: Amputations and resections in the subgroup of small wounds. Data show the number (N) of participants available for the analysis in total and for both treatment arms and the number (N) and the percentage (%) of patients with amputations or resections and minor and major amputations.

| <b>Amputations &amp; Resections</b>                    | <b>Total</b> | <b>NPWT</b> | <b>SMWC</b> | <b>p</b> |
|--------------------------------------------------------|--------------|-------------|-------------|----------|
| <b>Big wounds</b>                                      | <b>N=172</b> | <b>N=88</b> | <b>N=84</b> |          |
| No. of patients with amputations or resections [N (%)] | 36 (20·9%)   | 16 (18·2%)  | 20 (23·8%)  | 0·45 (F) |
| No. of performed amputations and resections [N]        | 52           | 45          | 57          | 0·41 (U) |

|                                                |            |            |            |          |
|------------------------------------------------|------------|------------|------------|----------|
| No. of patients with minor amputations [N (%)] | 34 (19.8%) | 14 (15.9%) | 20 (23.8%) | 0.25 (F) |
| No. of patients with major amputations [N (%)] | 2 (1.2%)   | 2 (2.3%)   | 0 (0%)     | 0.50 (F) |

Table S16: Amputations and resections in the subgroup of big wounds. Data show the number (N) of participants available for the analysis in total and for both treatment arms and the number (N) and the percentage (%) of patients with amputations or resections and minor and major amputations.

| <b>Wound closure rate</b>              | <b>Total<br/>N=154</b> | <b>NPWT<br/>N=44</b> | <b>SMWC<br/>N=110</b> | <b>p</b> |
|----------------------------------------|------------------------|----------------------|-----------------------|----------|
| Wound closures [N (%)] within 16 weeks | 33 (21.4 %)            | 14 (31.8%)           | 19 (17.3%)            | 0.053    |
| Wound closures [N (%)] after 6 months  | 41 (26.6 %)            | 11 (25.0%)           | 30 (27.3%)            | 0.84     |

Table S17: Wound closure rate after 6 months and in the PP-population. Data show the number (N) of participants available for the analysis in total and for both treatment arms and the number (N) and the percentage (%) of patients with wound closures within 16 weeks and after 6 months.

| <b>Time until min. 95 %<br/>granulation tissue</b> | <b>Total (N=100)</b> | <b>NPWT (N=38)</b> | <b>SMWC (N=62)</b> | <b>p</b> |
|----------------------------------------------------|----------------------|--------------------|--------------------|----------|
| Mean (SD)                                          | 43.8 (42.3)          | 23.8 (31.7)        | 56.0 (43.5)        | <0.001   |
| Median (IQR)                                       | 30.0 (76)            | 8.5 (28.0)         | 56.0 (96.0)        |          |
| Min - Max                                          | 0 - 127              | 0 - 127            | 0 - 115            |          |

Table S18: Time until optimal preparation of the wound for further treatment (min 95 % granulation tissue) in the PP-population. Data show the number (N) of participants available for the analysis in total and for both treatment arms; mean (SD); median (IQR); and minimum (min) and maximum (max).

| <b>Recurrences</b>                       | <b>Total (N=154)</b> | <b>NPWT (N=44)</b> | <b>SMWC (N=110)</b> | <b>p</b> |
|------------------------------------------|----------------------|--------------------|---------------------|----------|
| No. of patients with recurrences [N (%)] | 8 (5.2 %)            | 3 (8.1 %)          | 5 (5.3%)            | 0.69     |
| No. of recurrences [N]                   | 9                    | 4                  | 5                   | 0.38     |

Table S19: Recurrences in the PP-population. Data show the number (N) of participants available for the analysis in total and for both treatment arms and the number (N) and the percentage (%) of patients with recurrences.

| <b>Amputations &amp; Resections</b>                  | <b>Total (N=154)</b> | <b>NPWT<br/>(N=44)</b> | <b>SMWC<br/>(N=110)</b> | <b>p</b> |
|------------------------------------------------------|----------------------|------------------------|-------------------------|----------|
| No. of patients with amputation or resection [N (%)] | 30 (19.5%)           | 9 (20.5%)              | 21 (21.4%)              | 0.83     |
| No. of amputations or resections [N]                 | 39                   | 11                     | 28                      | 0.86     |
| No. of patients with Minor-Amputations [N (%)]       | 30 (18.9%)           | 9 (12.8%)              | 21 (21.4%)              | 0.83     |
| No. of patients with Major-Amputations [N (%)]       | 0 (0%)               | 0 (0%)                 | 0 (0%)                  | -        |

Table S20: Amputations and resections in the PP-population. Data show the number (N) of participants available for the analysis in total and for both treatment arms and the number (N) and the percentage (%) of patients with amputations or resections and minor and major amputations.

| Observation time point | Wound surface NPWT                                         |                               | Wound surface SMWC     |                                                            |
|------------------------|------------------------------------------------------------|-------------------------------|------------------------|------------------------------------------------------------|
|                        | Calculated from width and length (according to eCRF entry) | Results of the photo analysis | Observation time point | Calculated from width and length (according to eCRF entry) |
| Randomization          | 964 (1392)                                                 | 633 (795)                     | 878 (1266)             | 669 (1143)                                                 |
|                        | 345 (1426)                                                 | 299 (705)                     | 373 (889)              | 294 (692)                                                  |
|                        | N= 44 (1)                                                  | N=41 (3)                      | N= 110 (0)             | N=102 (9)                                                  |
| Week 1                 | 525 (696)                                                  | 524 (614)                     | 827 (1238)             | 706 (1138)                                                 |
|                        | 224 (408)                                                  | 318 (561)                     | 306 (863)              | 289 (775)                                                  |
|                        | N= 44 (5)                                                  | N=41 (8)                      | N= 110 (16)            | N=102 (27)                                                 |
| Week 3                 | 428 (635)                                                  | 477 (737)                     | 803 (1306)             | 714 (1316)                                                 |
|                        | 176 (378)                                                  | 165 (424)                     | 238 (867)              | 259 (656)                                                  |
|                        | N= 44 (6)                                                  | N=41 (9)                      | N= 110 (7)             | N=102 (26)                                                 |
| Week 5                 | 355 (590)                                                  | 418 (602)                     | 650 (1157)             | 607 (1212)                                                 |
|                        | 100 (291)                                                  | 165 (435)                     | 161 (670)              | 167 (545)                                                  |
|                        | N= 44 (8)                                                  | N=41 (15)                     | N= 110 (18)            | N=102 (29)                                                 |
| Week 8                 | 284 (528)                                                  | 320 (530)                     | 569 (1072)             | 479 (990)                                                  |
|                        | 53 (217)                                                   | 83 (264)                      | 106 (443)              | 123 (397)                                                  |
|                        | N= 44 (8)                                                  | N=41 (16)                     | N= 110 (17)            | N=102 (29)                                                 |
| Week 12                | 283 (580)                                                  | 289 (537)                     | 528 (1024)             | 474 (1006)                                                 |
|                        | 14 (130)                                                   | 62 (175)                      | 79 (419)               | 111 (407)                                                  |
|                        | N= 44 (24)                                                 | N=41 (32)                     | N= 110 (71)            | N=102 (80)                                                 |
| Week 16                | 190 (416)                                                  | 179 (333)                     | 386 (1124)             | 319 (724)                                                  |
|                        | 0 (95)                                                     | 30 (204)                      | 31 (159)               | 65 (256)                                                   |
|                        | N= 44 (14)                                                 | N=41 (25)                     | N= 110 (19)            | N=102 (42)                                                 |

Table S21: Wound surface area at each observation time point during the study treatment time of maximum 16 weeks separately shown for the calculated data from width and length as documented in the eCRF and for the data derived from the photo analysis using W.H.A.T. Data show mean (SD) and median (IQR) as well the number (N) of values analyzed for the PP population (number (N) of values substituted by the last observation carried forward (LOCF) method).

| Observation time point | Wound volume NPWT (mm <sup>3</sup> ) | Wound volume SMWC (mm <sup>3</sup> ) |
|------------------------|--------------------------------------|--------------------------------------|
|------------------------|--------------------------------------|--------------------------------------|

|               |                                           |                                            |
|---------------|-------------------------------------------|--------------------------------------------|
| Randomization | 33359 (95749)<br>5746 (17330)<br>N=44 (1) | 14742 (36523)<br>3905 (11189)<br>N=110 (0) |
| Week 1        | 11606 (26991)<br>1824 (6113)<br>N=44 (5)  | 13525 (34844)<br>2470 (9479)<br>N=110 (16) |
| Week 3        | 8636 (24698)<br>777 (3199)<br>N=44 (6)    | 11907 (32047)<br>1864 (8039)<br>N=110 (7)  |
| Week 5        | 5480 (13967)<br>271 (1790)<br>N=44 (7)    | 8981 (25570)<br>1027 (4745)<br>N=110 (18)  |
| Week 8        | 3955 (9056)<br>192 (809)<br>N=44 (16)     | 6899 (18607)<br>506 (3915)<br>N=110 (29)   |
| Week 12       | 6052 (16114)<br>71 (681)<br>N=44 (25)     | 5964 (15930)<br>361 (1890)<br>N=110 (77)   |
| Week 16       | 3246 (11245)<br>0 (319)<br>N=44 (15)      | 3396 (10783)<br>57 (609)<br>N=110 (19)     |

Table S22: Wound volume (length x width x depth) for each observation time point during the study treatment time of maximum 16 weeks calculated from width· length and depth as documented in the eCRF. Data show mean (SD) and median (IQR) as well the number (N) of values analyzed for the PP population (number (N) of values substituted by the last observation carried forward (LOCF) method).

| Observation<br>time point | NPWT Granulation |          | NPWT Fibrin |          | NPWT Necrosis |          | SMWC Granulation |          | SMWC Fibrin |          | SMWC Necrosis |          |
|---------------------------|------------------|----------|-------------|----------|---------------|----------|------------------|----------|-------------|----------|---------------|----------|
|                           | eCRF             | W.H.A.T. | eCRF        | W.H.A.T. | eCRF          | W.H.A.T. |                  | eCRF     | W.H.A.T.    | eCRF     | W.H.A.T.      | eCRF     |
| Rando                     | 32 (37)          | 23 (26)  | 18 (27)     | 68 (27)  | 2 (7)         | 9 (15)   | 38 (38)          | 26 (27)  | 21 (29)     | 67 (29)  | 1 (7)         | 7 (15)   |
|                           | 10 (68)          | 13 (37)  | 3 (28)      | 69 (45)  | 0 (0)         | 0 (15)   | 25 (80)          | 16 (42)  | 10 (33)     | 77 (56)  | 0 (0)         | 0 (8)    |
|                           | 44 (1)           | 41 (2)   | 44 (1)      | 41 (2)   | 44 (1)        | 41 (2)   | 110 (0)          | 102 (9)  | 110 (0)     | 102 (9)  | 108 (2)       | 102 (9)  |
| Week 1                    | 72 (37)          | 22 (26)  | 7 (13)      | 70 (28)  | 2 (7)         | 9 (15)   | 54 (35)          | 24 (27)  | 22 (24)     | 72 (27)  | 5 (14)        | 5 (9)    |
|                           | 90 (50)          | 9 (41)   | 0 (10)      | 75 (50)  | 0 (0)         | 0 (11)   | 63 (70)          | 13 (42)  | 13 (28)     | 78 (42)  | 0 (1)         | 0 (6)    |
|                           | 44 (5)           | 41 (8)   | 44 (6)      | 41 (8)   | 44 (7)        | 41 (8)   | 110 (16)         | 102 (27) | 110 (16)    | 102 (27) | 108 (19)      | 102 (27) |
| Week 3                    | 77 (32)          | 16 (24)  | 11 (19)     | 79 (26)  | 1 (4)         | 6 (14)   | 61 (31)          | 24 (27)  | 25 (25)     | 75 (26)  | 4 (11)        | 3 (7)    |
|                           | 93 (34)          | 2 (29)   | 0 (20)      | 91 (37)  | 0 (0)         | 0 (1)    | 70 (50)          | 15 (42)  | 20 (35)     | 83 (41)  | 0 (0)         | 0 (1)    |
|                           | 44 (6)           | 41 (9)   | 44 (7)      | 41 (9)   | 44 (7)        | 41 (9)   | 110 (9)          | 102 (26) | 110 (10)    | 102 (26) | 108 (13)      | 102 (26) |
| Week 5                    | 82 (29)          | 10 (16)  | 9 (19)      | 87 (17)  | 1 (4)         | 3 (9)    | 65 (29)          | 19 (27)  | 24 (24)     | 78 (27)  | 3 (9)         | 3 (11)   |
|                           | 95 (20)          | 4 (11)   | 2 (10)      | 93 (21)  | 0 (0)         | 0 (1)    | 73 (46)          | 4 (34)   | 13 (37)     | 93 (35)  | 0 (0)         | 0 (0)    |
|                           | 44 (7)           | 41 (16)  | 44 (8)      | 41 (16)  | 44 (9)        | 41 (16)  | 110 (19)         | 102 (27) | 110 (22)    | 102 (27) | 108 (22)      | 102 (27) |
| Week 8                    | 85 (27)          | 15 (25)  | 6 (13)      | 82 (26)  | 2 (6)         | 3 (8)    | 74 (27)          | 20 (26)  | 18(21)      | 77 (27)  | 3 (10)        | 3 (12)   |
|                           | 100 (20)         | 1 (16)   | 0 (5)       | 96 (35)  | 0 (0)         | 0 (0)    | 80 (31)          | 3 (38)   | 10 (18)     | 91 (43)  | 0 (0)         | 0 (0)    |
|                           | 44 (9)           | 41 (16)  | 44 (10)     | 41 (16)  | 44 (9)        | 41 (16)  | 110 (18)         | 102 (30) | 110 (21)    | 102 (30) | 108 (25)      | 102 (30) |
| Week 12                   | 86 (26)          | 13 (24)  | 6 (14)      | 85 (26)  | 2 (9)         | 2 (6)    | 77 (27)          | 18 (25)  | 16 (20)     | 80 (25)  | 3 (11)        | 2 (6)    |
|                           | 100 (18)         | 1 (13)   | 0 (4)       | 99 (20)  | 0 (0)         | 0 (0)    | 85 (29)          | 3 (36)   | 10 (20)     | 92 (36)  | 0 (0)         | 0 (0)    |
|                           | 44 (26)          | 41 (34)  | 44 (26)     | 41 (32)  | 44 (28)       | 41 (32)  | 110 (72)         | 101 (78) | 110 (73)    | 102 (79) | 108 (73)      | 102 (80) |
| Week 16                   | 87 (25)          | 12 (22)  | 6 (14)      | 86 (24)  | 0-1 (1)       | 1 (6)    | 80 (30)          | 19 (25)  | 14 (24)     | 80 (26)  | 2 (11)        | 1 (5)    |
|                           | 100 (15)         | 0 (14)   | 0 (1)       | 100 (20) | 0 (0)         | 0 (0)    | 95 (20)          | 5 (36)   | 0 (20)      | 92 (36)  | 0 (0)         | 0 (0)    |
|                           | 44 (14)          | 41 (25)  | 44 (16)     | 41 (25)  | 44 (15)       | 41 (25)  | 110 (18)         | 102 (42) | 110 (21)    | 102 (42) | 108 (24)      | 102 (42) |

1  
2  
3  
4  
5  
6  
7  
8  
9  
10  
11  
12  
13  
14  
15  
16  
17  
18  
19  
20  
21  
22  
23  
24  
25  
26  
27  
28  
29  
30  
31  
32  
33  
34  
35  
36  
37  
38  
39  
40  
41  
42  
43  
44  
45  
46

Table S23: Wound tissue (granulation, fibrin, necrosis) at each observation time point during the study treatment time of maximum 16 weeks separately shown for the data documented in the eCRF and for the data derived from the photo analysis using the wound healing analyzing too (W.H.A.T.). Data show mean (SD) and median (IQR) as well the number (N) of values analyzed for the PP population (number (N) of values substituted by the last observation carried forward (LOCF) method).

For peer review only



| Observation time point | Pain Total<br>N=344             | Pain NPWT<br>N=171               |
|------------------------|---------------------------------|----------------------------------|
| Screening              | 1·3 (2·1)<br>0 (2)<br>N=44 (0)  | 1·8 (2·3)<br>1 (3)<br>N=110 (0)  |
| Week 1                 | 0·7 (1·5)<br>0 (1)<br>N=44 (0)  | 1·4 (2·1)<br>0 (3)<br>N=110 (5)  |
| Week 3                 | 0·4 (0·7)<br>0 (1)<br>N=44 (4)  | 1·3 (1·8)<br>0 (2)<br>N=110 (3)  |
| Week 5                 | 0·3 (0·8)<br>0 (0)<br>N=44 (2)  | 1·0 (1·6)<br>0 (2)<br>N=110 (5)  |
| Week 8                 | 0·4 (1·1)<br>0 (0)<br>N=44 (4)  | 0·9 (1·5)<br>0 (2)<br>N=110 (9)  |
| Week 12                | 0·3 (1·0)<br>0 (0)<br>N=44 (11) | 0·7 (1·3)<br>0 (1)<br>N=110 (18) |
| Week 16                | 0·2 (0·7)<br>0 (0)<br>N=44 (14) | 0·5 (1·2)<br>0 (0)<br>N=110 (13) |

Table S24: Pain evaluation at the pre-defined observation time points during the active study treatment time of 16 weeks in the PP population. Data show mean (SD) and median (IQR) as well the number (N) of values analyzed for the PP population (number (N) of values substituted by the last observation carried forward (LOCF) method).

| Observation time point              | EQ5D NPWT                              | EQ5D SMWC                               |
|-------------------------------------|----------------------------------------|-----------------------------------------|
| Screening                           | 0·61 (0·23)<br>0·63 (0·24)<br>N=42 (1) | 0·60 (0·20)<br>0·59 (0·25)<br>N=100 (3) |
| End of therapy                      | 0·65 (0·20)<br>0·78 (0·20)<br>N=26 (2) | 0·81 (0·14)<br>0·87 (0·26)<br>N=8 (0)   |
| End of maximum study treatment time | 0·65 (0·25)                            | 0·66 (0·21)                             |

|                          |                                        |                                        |
|--------------------------|----------------------------------------|----------------------------------------|
|                          | 0·66 (0·43)<br>N=19 (0)                | 0·63 (0·28)<br>N=73 (2)                |
| Follow up after 6 months | 0·75 (0·22)<br>0·78 (0·30)<br>N=26 (0) | 0·70 (0·23)<br>0·77 (0·34)<br>N=73 (2) |

Table S25: Quality of life evaluated with the EQ5D instrument at the pre-defined observation time points during the active study treatment time of 16 weeks in the PP population. Data show mean (SD) and median (IQR) as well the number (N) of values analyzed for the PP population (number (N) of values substituted by the last observation carried forward (LOCF) method).

### Supplementary Discussion

As direct blinding of patients and investigators was not possible due to the nature of the applied treatment methods, issues of blinding have been addressed using independent blinded outcome assessors and the W.H.A.T. for evaluating the wound photographs. For wound size and wound tissue, the values documented by the investigators reflect the expected course much better than the W.H.A.T. results. During study planning the W.H.A.T. (<http://www.what-world.com/>) was the only available validated instrument that was able to measure both wound size and wound tissue composition (granulation, fibrin, and necrosis). For the wound surface area, the difference between the clinical measurements and the W.H.A.T. results may have been caused by the different evaluation methods. An elliptical wound surface area was calculated by the investigators using length and width, but most wounds are not elliptical. The independent blinded assessors marked the wound margin on the photograph and the W.H.A.T. calculates the wound surface area automatically afterwards, thus if the wound photo is of good quality the W.H.A.T. is more precise. In addition, the depth of the wound cannot be assessed using a wound photo, thus wound volume has only been evaluated using the clinical measurements provided by the investigators. The values for granulation tissue and fibrin differ significantly between the clinical estimations and the W.H.A.T. results. This may be caused by the quality of the wound photography, the reliability and precision of both the clinical investigator and the W.H.A.T. system and the wound itself. Wounds with invisible, deeper areas cannot be detected without manipulation. Both circumstances possibly affect the results.

## Supplementary Appendix

### Table of contents:

- [List of investigators](#)
- [Supplementary baseline characteristics for the ITT population](#)
- [Supplementary baseline characteristics for the PP population](#)
- ~~[Supplementary discussion](#)~~
- [Supplementary result tables](#)
- [Supplementary discussion](#)

### List of investigators:

|                                      |                                                                                                                   |
|--------------------------------------|-------------------------------------------------------------------------------------------------------------------|
| 1. PD Dr. med. Achim Neufang         | HSK - Dr. Horst Schmidt Kliniken GmbH<br>Klinik für Gefäßchirurgie<br>Ludwig-Erhard-Straße 100<br>65199 Wiesbaden |
| 2. Dr. med. Holger Lawall            | Asklepios Westklinikum Hamburg<br>Zentrum für Gefäßmedizin<br>Suurheid 20<br>22559 Hamburg                        |
| 3. Prof. Dr. med. Gernold<br>Wozniak | Knappschaftskrankenhaus Bottrop<br>Gefäßchirurgische Klinik<br>Osterfelderstraße 157<br>46242 Bottrop             |
| 4. Prof. Dr. med. Martin Storck      | Städtisches Klinikum Karlsruhe<br>Klinik für Gefäß- und Thoraxchirurgie<br>Moltkestraße 90<br>76133 Karlsruhe     |
| 5. Dr. med. Dirk Hochlenert          | Gemeinschaftspraxis Schlotmann-Hochlenert-Zavaleta-Haberstock<br>Merheimer Straße 217<br>50733 Köln               |
| 6. Dr. med. Gudrun Hetzel            | Klinikum Döbeln<br>Abt. für Gefäßchirurgie<br>Sörmitzer Straße 10<br>04720 Döbeln                                 |
| 7. Dr. med. Karsten Jungheim         | Klinikum Bielefeld Mitte<br>Klinik für Allgemeine Innere Medizin<br>Teutoburger Straße 50<br>33604 Bielefeld      |
| 8. Dr. med. Michael Petzold          | Klinikum Frankfurt/Oder                                                                                           |

|                                         |                                                                                                                                                                       |
|-----------------------------------------|-----------------------------------------------------------------------------------------------------------------------------------------------------------------------|
|                                         | Klinik für Gefäßchirurgie<br>Müllroser Chaussee 7<br>15236 Frankfurt/Oder                                                                                             |
| 9. PD Dr. med. Matthias Weck            | Weißeritztal-Kliniken GmbH<br>Medizinische Klinik III<br>Bürgerstraße 7<br><del>ta</del> 01705 Freital                                                                |
| 10. Dr. med. Alexandra Zidek            | Krankenhaus Porz am Rhein<br>Klinik für Gefäßchirurgie<br>Urbacher Weg 19<br>51149 Köln                                                                               |
| 11. Dr. med. Peter Mauckner             | St. Remigius Krankenhaus Opladen<br>Innere Medizin<br>An St. Remigius 26<br>51379 Leverkusen                                                                          |
| 12. Dr. med. Klemens M. Sondern         | Marien Hospital Dortmund-Hombruch<br>Klinik für Innere Medizin/Diabetologie<br>Gablonzstraße 9<br>44225 Dortmund                                                      |
| 13. Prof. Dr. med. Thomas Schmitz-Rixen | Universitätsklinikum Frankfurt<br>Zentrum für Chirurgie<br>Klinik für Gefäß- und Endovascularchirurgie<br>Theodor-Stern-Kai 7, Haus 23C/EG<br>60590 Frankfurt am Main |
| 14. Dr. med. Walter Wetzel-Roth         | Facharztpraxis für Chirurgie<br>Hindenburgstraße 1<br>86807 Buchloe                                                                                                   |
| 15. Dr. med. Matthias Hahn              | Helfenstein Klinik Geislingen<br>Allgemein- und Viszeralchirurgie<br>Eybstraße 16<br>73312 Geislingen/Steige                                                          |
| 16. Dr. med. Karsten Glockemann         | Paracelsus-Klinik am Silbersee<br>Wundzentrum Hannover<br>Oertzeweg 24<br>30851 Langenhagen                                                                           |
| 17. PD Dr. med. Farzin Adili            | Klinikum Darmstadt<br>Chirurgische Klinik III<br>Grafenstraße 9<br>64283 Darmstadt                                                                                    |
| 18. Dr. med. Andreas Riemer             | Ortenau Klinikum Offenburg-Ebertplatz<br>Klinik für Allgemein-, Viszeral- und Gefäßchirurgie                                                                          |

|                                             |                                                                                                                                                                   |
|---------------------------------------------|-------------------------------------------------------------------------------------------------------------------------------------------------------------------|
|                                             | Ebertplatz 12<br>77654 Offenburg                                                                                                                                  |
| 19. Dr. med. Thomas Krönert                 | Thüringen-Kliniken "Georgius Agricola" GmbH<br>Klinik für Gefäßchirurgie<br>Rainweg 68<br><a href="#">feld07318 Saalfeld/Saale</a>                                |
| 20. Dr. med. Matthias Holfeld               | Klinikum Dorothea Christiane Erxleben GmbH<br>Klinik für Allgemein-, Viszeral- und Gefäßchirurgie<br>Ditfurter Weg 24<br><a href="#">linburg06484 Quedlinburg</a> |
| 21. Prof. Dr. med. Jan Andre´ Schmidt-Lucke | Franziskus-Krankenhaus Berlin<br>Abt. für Innere Medizin<br>Budapester Straße 15-19<br>10787 Berlin                                                               |
| 22. Dr. med. Wolf-Rüdiger Klare             | Hegau-Bodensee Klinikum Radolfzell (HBK)<br>Klinik für Innere Medizin<br>Hausherrenstraße 12<br>78315 Radolfzell                                                  |
| 23. Dr. med. Hansjörg Mühlen                | Diabetologische Schwerpunktpraxis Dr. med. Hansjörg Mühlen & Partner<br>Ruhorter Straße 195<br>47119 Duisburg                                                     |
| 24. Dr. med. Christian Reinhold             | Kliniken Maria Hilf Mönchengladbach<br>Klinik für Gefäßchirurgie und Angiologie<br>Sandradstraße 43<br>41061 Mönchengladbach                                      |
| 25. Dr. med. Makarios Paschalidis           | Städtisches Klinikum München/Bogenhausen<br>Klinik für Endokrinologie, Diabetologie und Angiologie<br>Engschalkingerstraße 77<br>81925 München                    |
| 26. Gerhard Rothenaicher                    | Facharztpraxis für Chirurgie<br>Cosimastraße 2<br>81927 München                                                                                                   |
| 27. Dr. med. Elke Anne Klug                 | Bürgerhospital Frankfurt am Main<br>Interdisziplinäres Zentrum Diabetischer Fuß (DDG)<br>Nibelungenallee 37- 41<br>60318 Frankfurt am Main                        |
| 28. Dr. med. Siamak Pourhassan              | Gemeinschaftspraxis für Chirurgie und Gefäßmedizin<br>Drs. Alter / Pourhassan / Heim<br>Klosterstraße 12<br>46145 Oberhausen                                      |

|                                 |                                                                                                                                                                                     |
|---------------------------------|-------------------------------------------------------------------------------------------------------------------------------------------------------------------------------------|
| 29. Dr. med. Jan Theil          | Evangelisches Krankenhaus Königin Elisabeth Herzberge gGmbH<br>Abt. für Kardiologie, Angiologie und Diabetologie<br>Herzbergstraße 79<br>10365 Berlin                               |
| 30. Dr. med. Martin Adolph      | Städtisches Klinikum Neunkirchen gGmbH<br>Abt. für Gefäßchirurgie & Phlebologie<br>Brunnenstraße 20<br>66538 Neunkirchen                                                            |
| 31. Dr. med. Frank von Feldmann | Westküstenklinikum Heide Klinik für Viszeral- und Gefäßchirurgie<br>Esmarchstraße 50<br>25746 Heide/Holstein                                                                        |
| 32. Dr. med. Gerald Engels      | Chir. Praxisgemeinschaft am Bayenthalgürtel<br>Praxis Dr. med. Gerald Engels<br>Bayenthalgürtel 45<br>50968 Köln                                                                    |
| 33. Dr. med. Joachim Oldenburg  | Malteser Krankenhaus – St. Franziskus-Hospital<br>Medizinische Klinik I<br>Abt. für Diabetologie<br>Waldstraße 17<br>24939 Flensburg                                                |
| 34. Dr. med. Philipp Knepe      | St. Marienkrankenhaus Siegen gGmbH<br>Klinik für Gastroenterologie<br>Kampenstraße 51<br>57072 Siegen                                                                               |
| 35. Dr. med. Steffen Hering     | Krankenhaus Bietigheim<br>Klinik für Innere Medizin, Kardiologie, Endokrinologie,<br>Diabetologie und Internistische Intensivmedizin<br>Riedstraße 12<br>74321 Bietigheim-Bissingen |
| 36. Dr. med. Harald Daum        | Asklepios Kliniken Harburg<br>Eißendorfer Pferdeweg 52<br>21075 Hamburg                                                                                                             |
| 37. Dr. med. Lutz Stemler       | Diabetologikum Ludwigshafen<br>Diabetes-Schwerpunktpraxis<br>Ludwigsplatz 9<br>67059 Ludwigshafen                                                                                   |
| 38. Dr. med. Thomas Müller      | Mariannen-Hospital Werl<br>Abt. für Chirurgie<br>Unnaer Straße 15<br>59457 Werl                                                                                                     |

|                           |                                                                                        |
|---------------------------|----------------------------------------------------------------------------------------|
| 39. Dr. med. Karl Zink    | Diabetes Klinik GmbH & Co KG<br>Theodor-Klotzbücher-Straße 12<br>97980 Bad Mergentheim |
| 40. Dr. med. Dirk Lammers | Institut für Diabetesforschung Münster GmbH<br>Hohenzollernring 70<br>48145 Münster    |

Table S1: The table shows all study sites that have included at least one patient into the DiaFu-study.

### Supplementary baseline characteristics for the ITT population

| <b>Baseline parameters<br/>(ITT population)</b>           | <b>Total<br/>N=345 (100 %)</b> | <b>NPWT<br/>N=171 (49·6%)</b> | <b>SMWC<br/>N=174 (50·4%)</b> |
|-----------------------------------------------------------|--------------------------------|-------------------------------|-------------------------------|
| <u>Alcohol</u>                                            | <u>N=341</u>                   | <u>N=169</u>                  | <u>N=172</u>                  |
| Occasionally                                              | 157 (46%)                      | 83 (48·5%)                    | 74 (42·3%)                    |
| Chronic                                                   | 10 (2·9%)                      | 3 (1·8%)                      | 7 (4·0%)                      |
| No                                                        | 174 (51%)                      | 83 (48·5%)                    | 91 (52%)                      |
| <u>Smoking</u>                                            | <u>N=342</u>                   | <u>N=169</u>                  | <u>N=173</u>                  |
| No                                                        | 49 (14·3%)                     | 25 (14·6%)                    | 24 (13·7%)                    |
| Yes                                                       | 293 (85·7%)                    | 144 (84·3%)                   | 149 (85·1%)                   |
| Number of years                                           |                                |                               |                               |
| Mean (SD)                                                 | 34·8 (13·5)                    | 36·5 (14·9)                   | 33·1 (12·1)                   |
| Packs / day                                               |                                |                               |                               |
| Mean                                                      | 1·1                            | 1·1                           | 1·2                           |
| <u>Drugs</u>                                              | <u>N=341</u>                   | <u>N=169</u>                  | <u>N=172</u>                  |
| Occasionally                                              | 1 (0·3%)                       | 1 (0·6%)                      | 0                             |
| Chronic                                                   | 2 (0·6%)                       | 0                             | 2 (1·1%)                      |
| No                                                        | 338 (97·7%)                    | 168 (98·2%)                   | 170 (97·1%)                   |
| <u>Allergies</u>                                          | <u>N=343</u>                   | <u>N=170</u>                  | <u>N=173</u>                  |
| Yes                                                       | 37 (10·7%)                     | 16 (9·4%)                     | 21 (12·0%)                    |
| No                                                        | 306 (88·4%)                    | 154 (90·1%)                   | 152 (86·9%)                   |
| <u>Subjective assessment of nutritional<br/>condition</u> | <u>N=342</u>                   | <u>N=169</u>                  | <u>N=173</u>                  |
| Well-nourished                                            | 325 (94·2%)                    | 162 (94·7%)                   | 163 (93·7%)                   |
| Moderately malnourished or<br>suspected malnutrition      | 11 (3·2%)                      | 4 (2·3%)                      | 7 (4%)                        |

|                     |               |               |               |
|---------------------|---------------|---------------|---------------|
| <u>Malnourished</u> | <u>0 (0%)</u> | <u>0 (0%)</u> | <u>0 (0%)</u> |
|---------------------|---------------|---------------|---------------|

Table S2: The table shows baseline characteristics of the ITT- population. Data are Number (N) and Percentage (%), or Mean and Standard Deviation (SD). "N=" is stating the number of patients with actual available information.

### Supplementary Discussion

~~As direct blinding of patients and investigators was not possible due to the nature of the applied treatment methods, issues of blinding have been addressed using independent blinded outcome assessors and the W.H.A.T. for evaluating the wound photographs. For wound size and wound tissue the values documented by the investigators reflect the expected course much better than the W.H.A.T. results. During study planning the W.H.A.T. (<http://www.what-world.com/>) was the only available validated instrument that was able to measure both wound size and wound tissue composition (granulation, fibrin, and necrosis). For the wound surface area, the difference between the clinical measurements and the W.H.A.T. results may have been caused by the different evaluation methods. An elliptical wound surface area was calculated by the investigators using length and width, but most wounds are not elliptical. The independent blinded assessors marked the wound margin on the photograph and the W.H.A.T. calculates the wound surface area automatically afterwards, thus if the wound photo is of good quality the W.H.A.T. is more precise. In addition, the depth of the wound cannot be assessed using a wound photo, thus wound volume has only been evaluated using the clinical measurements provided by the investigators. The values for granulation tissue and fibrin differ significantly between the clinical estimations and the W.H.A.T. results. This may be caused by the quality of the wound photography, the reliability and precision of both the clinical investigator and the W.H.A.T. system and the wound itself. Wounds with invisible, deeper areas cannot be detected without manipulation. Both circumstances possibly affect the results.~~

### Supplementary tables

#### Supplementary baseline characteristics for the PP population

| Demographic and baseline parameters (PP-Population) | Total<br>N=154 (100%) | NPWT<br>N=44<br>(28.6%) | SMWC<br>N=110<br>(71.4%) |
|-----------------------------------------------------|-----------------------|-------------------------|--------------------------|
| Sex                                                 | N=154                 | N=44                    | N=110                    |
| Male                                                | 113 (73.4%)           | 29 (65.9%)              | 84 (76.4%)               |
| Female                                              | 41 (26.6%)            | 15 (34.1%)              | 26 (23.6%)               |
| Age in years                                        | N=154                 | N=44                    | N=110                    |
| Mean (SD)                                           | 67.4 (10.6)           | 66.5 (11.0)             | 67.8 (10.4)              |
| Height in cm                                        | N=153                 | N=43                    | N=110                    |
| Mean (SD)                                           | 173.8 (12.9)          | 173.5 (17.4)            | 174.0 (10.7)             |
| Weight in kg                                        | N=150                 | N=42                    | N=108                    |
| Mean (SD)                                           | 95.4 (23.3)           | 96.2 (21.6)             | 95.1 (24.0)              |



|                                                                      |               |              |              |
|----------------------------------------------------------------------|---------------|--------------|--------------|
| Alcohol                                                              | N=153         | N=44         | N=109        |
| Occasionally                                                         | 71 (46.4%)    | 22 (50.0%)   | 49 (45.0%)   |
| Chronic                                                              | 3 (2.0%)      | 1 (2.3%)     | 2 (1.8%)     |
| No                                                                   | 79 (51.6%)    | 21 (47.7%)   | 58 (53.2%)   |
| Smoking                                                              | N=154         | N=44         | N=110        |
| No                                                                   | 16 (10.4%)    | 2 (4.5%)     | 14 (12.7%)   |
| Yes                                                                  | 138 (89.6%)   | 42 (95.5%)   | 96 (87.3%)   |
| Number of years (Mean (SD))                                          | 37.0 (9.2)    | 42.0 (2.8)   | 36.3 (9.7)   |
| Packs / day (Mean)                                                   | 1.0           | 1.0          | 1.0          |
| Drugs                                                                | N=153         | N=44         | N=109        |
| Occasionally                                                         | 0 (0%)        | 0 (0%)       | 0 (0%)       |
| Chronic                                                              | 1 (0.7%)      | 0 (0%)       | 1 (0.9%)     |
| No                                                                   | 152 (99.3%)   | 44 (100%)    | 108 (99.1%)  |
| Requiring dialysis                                                   | N=154         | N=44         | N=110        |
| Yes                                                                  | 11 (7.1%)     | 2 (4.5%)     | 9 (8.2%)     |
| No                                                                   | 143 (92.9%)   | 42 (95.5%)   | 101 (91.8%)  |
| Allergies                                                            | N=154         | N=44         | N=110        |
| Yes                                                                  | 16 (10.4%)    | 6 (13.6%)    | 10 (9.1%)    |
| No                                                                   | 138 (89.6%)   | 38 (86.4%)   | 100 (90.9%)  |
| Subjective assessment of nutritional condition                       | N=150         | N=43         | N=107        |
| Well-nourished                                                       | 147 (98.0%)   | 42 (97.7%)   | 105 (98.1%)  |
| Moderately malnourished or suspected malnutrition                    | 3 (2.0%)      | 1 (2.3%)     | 2 (1.9%)     |
| Malnourished                                                         | 0 (0%)        | 0 (0%)       | 0 (0%)       |
| Peripheral arterial occlusive disease (PAOD)                         | N=109 (70.8%) | N=29 (65.9%) | N=80 (72.7%) |
| without critical limb ischemia                                       | 103 (94.5%)   | 28 (96.6%)   | 75 (93.8%)   |
| with critical limb ischemia                                          | 6 (5.5%)      | 1 (3.4%)     | 5 (6.3%)     |
| Rutherford classification for chronic limb ischemia (Grade/Category) | N=109         | N=29         | N=80         |
| 0/0 Asymptomatic—no hemodynamically significant occlusive disease    | 13 (11.9%)    | 4 (13.8%)    | 9 (11.3%)    |
| I/1 Mild claudication                                                | 13 (11.9%)    | 2 (6.9%)     | 11 (13.8%)   |
| I/2 Moderate claudication                                            | 8 (7.3%)      | 0 (0.0%)     | 8 (10.0%)    |
| I/3 Severe claudication                                              | 4 (3.7%)      | 1 (3.4%)     | 3 (3.8%)     |

|                                                                                                      |               |               |               |
|------------------------------------------------------------------------------------------------------|---------------|---------------|---------------|
| II/4 Ischemic rest pain                                                                              | 1 (0.9%)      | 1 (3.4%)      | 0 (0%)        |
| III/5 Minor tissue loss—non healing ulcer, focal gangrene with diffuse pedal ischemia                | 67 (61.5%)    | 21 (72.4%)    | 46 (57.5%)    |
| III/6 Major tissue loss—extending above transmetatarsal level, functional foot no longer salvageable | 3 (2.8%)      | 0 (0.0%)      | 3 (3.8%)      |
| Revascularisation before study start                                                                 | N=9 (5.8%)    | N=1 (2.3%)    | N=8 (7.3%)    |
| Percutaneous transluminal angioplasty (PTA)                                                          | 5 (55.6%)     | 0 (0.0%)      | 5 (62.5%)     |
| PTA + Stent                                                                                          | 0 (0%)        | 0 (0%)        | 0 (0%)        |
| Veins-Bypass                                                                                         | 1 (11.1%)     | 1 (100.0%)    | 0 (11.1%)     |
| Polytetrafluoroethylene (PTFE) Bypass                                                                | 1 (11.1%)     | 0 (0%)        | 1 (12.5%)     |
| Thromboendarterectomy and patch plastic                                                              | 2 (22.2%)     | 0 (0%)        | 2 (25.0%)     |
| Revascularization with influence on the wound                                                        | 9 of 9 (100%) | 1 of 1 (100%) | 0 of 8 (100%) |
| Sufficient revascularization result                                                                  | 9 of 9 (100%) | 1 of 1 (100%) | 8 of 8 (100%) |
| Insufficient revascularization result                                                                | 0 of 9 (0%)   | 0 of 1 (0%)   | 0 of 8 (0%)   |
| Revascularization result not assessable                                                              | 0 of 9 (0%)   | 0 of 1 (0%)   | 0 of 8 (0%)   |

Table S34: Patient demographics and baseline characteristics of the Per-Protocol (PP) population. Data are N (%) and Mean (SD). “N=” is stating the number of patients with actual available information. Findings, diagnoses and procedures documented by the investigators are presented.

### Supplementary result tables

| Observation time point | Wound surface NPWT                                         |                                      | Wound surface SMWC                                         |                                       |
|------------------------|------------------------------------------------------------|--------------------------------------|------------------------------------------------------------|---------------------------------------|
|                        | Calculated from width and length (according to eCRF entry) | Results of the photo analysis        | Calculated from width and length (according to eCRF entry) | Results of the photo analysis         |
| Randomization          | 1060 (1536)<br>550 (1236)<br>N=171 (2)                     | 687 (879)<br>321 (760)<br>N=118 (10) | 1141 (3247)<br>471 (1007)<br>N=174 (0)                     | 664 (1050)<br>316 (658)<br>N=129 (13) |
| Week 1                 | 847 (1489)<br>397 (801)<br>N=171 (15)                      | 643 (820)<br>329 (750)<br>N=118 (32) | 1085 (3234)<br>395 (867)<br>N=174 (25)                     | 713 (1065)<br>307 (749)<br>N=129 (36) |
| Week 3                 | 810 (1472)<br>314 (860)<br>N=171 (24)                      | 590 (742)<br>273 (633)<br>N=118 (28) | 1025 (3242)<br>390 (913)<br>N=174 (22)                     | 701 (1212)<br>266 (768)<br>N=129 (35) |
| Week 5                 | 717 (1379)                                                 | 607 (828)                            | 759 (1466)                                                 | 610 (1119)                            |

|         |                                       |                                      |                                       |                                       |
|---------|---------------------------------------|--------------------------------------|---------------------------------------|---------------------------------------|
|         | 275 (769)<br>N=171 (37)               | 231 (843)<br>N=118 (42)              | 267 (824)<br>N=174 (41)               | 219 (635)<br>N=129 (38)               |
| Week 8  | 636 (1322)<br>220 (712)<br>N=171 (52) | 495 (770)<br>182 (561)<br>N=118 (48) | 674 (1410)<br>186 (783)<br>N=174 (42) | 501 (937)<br>165 (481)<br>N=129 (42)  |
| Week 12 | 549 (858)<br>165 (964)<br>N=171 (110) | 457 (742)<br>134 (494)<br>N=118 (88) | 570 (940)<br>169 (632)<br>N=174 (124) | 493 (950)<br>133 (498)<br>N=129 (104) |
| Week 16 | 440 (810)<br>79 (471)<br>N=171 (80)   | 334 (649)<br>114 (363)<br>N=118 (66) | 493 (1095)<br>69 (415)<br>N=174 (63)  | 351 (750)<br>77 (320)<br>N=129 (56)   |

Table S42: Wound surface area at each observation time point in the ITT-population. Wound surface area at each observation time point until end of maximum study treatment time -of 16 weeks is separately shown for the calculated data from width and length as documented in the eCRF and for the data derived from the photo analysis. An elliptical wound surface area has been calculated from the documented width and length (eCRF) [(pi / 4) x length x width = area]. Data show mean (SD) and median (IQR) as well the number (N) of values analyzed for the ITT population (number (N) of values substituted by the last observation carried forward (LOCF) method).

| Observation time point | Wound volume NPWT (mm <sup>3</sup> )       | Wound volume SMWC (mm <sup>3</sup> )        |
|------------------------|--------------------------------------------|---------------------------------------------|
| Randomization          | 22498 (58930)<br>4710 (15048)<br>N=171 (2) | 21740 (74181)<br>4759 (12888)<br>N=174 (0)  |
| Week 1                 | 13203 (28709)<br>2487 (6908)<br>N=171 (15) | 19979 (73143)<br>3533 (11407)<br>N=174 (26) |
| Week 3                 | 10708 (28521)<br>1884 (6857)<br>N=171 (24) | 16217 (67494)<br>2293 (8831)<br>N=174 (23)  |
| Week 5                 | 7700 (19719)<br>1166 (5338)<br>N=171 (37)  | 11286 (32566)<br>1365 (7539)<br>N=174 (42)  |
| Week 8                 | 5592 (11535)<br>785 (4604)<br>N=171 (78)   | 8772 (27674)<br>812 (5258)<br>N=174 (67)    |
| Week 12                | 5333 (12422)<br>565 (3913)                 | 6639 (16454)<br>625 (4083)                  |

|         |              |              |
|---------|--------------|--------------|
|         | N=171 (119)  | N=174 (133)  |
| Week 16 | 3880 (10534) | 5465 (14874) |
|         | 141 (1890)   | 200 (1587)   |
|         | N=171 (83)   | N=174 (64)   |

Table S53: Wound volume at each observation time point during the study treatment time of maximum 16 weeks in the ITT-population. Wound volume (length x width x depth) -was calculated from width, length and depth as documented in the eCRF. Data show mean (SD) and median (IQR) as well the number (N) of values analyzed for the ITT population (number (N) of values substituted by the last observation carried forward (LOCF) method).

For peer review only

| Observation<br>time point | NPWT Granulation |          | NPWT Fibrin |          | NPWT Necrosis |          | SMWC Granulation |           | SMWC Fibrin |          | SMWC Necrosis |          |
|---------------------------|------------------|----------|-------------|----------|---------------|----------|------------------|-----------|-------------|----------|---------------|----------|
|                           | eCRF             | W.H.A.T. | eCRF        | W.H.A.T. | eCRF          | W.H.A.T. | eCRF             | W.H.A.T.  | eCRF        | W.H.A.T. | eCRF          | W.H.A.T. |
| Rando                     | 34 (36)          | 22 (25)  | 21 (28)     | 71 (27)  | 3 (10)        | 7 (15)   | 34 (37)          | 24 (26)   | 22 (29)     | 69 (28)  | 2 (9)         | 7 (14)   |
|                           | 20 (70)          | 12 (37)  | 10 (30)     | 79 (46)  | 0 (0)         | 0 (5)    | 20 (71)          | 14 (39)   | 10 (40)     | 79 (44)  | 0 (0)         | 0 (8)    |
|                           | 171 (2)          | 118 (8)  | 170 (4)     | 118 (8)  | 169 (5)       | 118 (8)  | 174 (3)          | 129 (12)  | 174 (1)     | 129 (12) | 172 (2)       | 129 (12) |
| Week 1                    | 58 (35)          | 21 (25)  | 19 (22)     | 73 (27)  | 5 (13)        | 6 (12)   | 49 (35)          | 21 (25)   | 24 (27)     | 74 (26)  | 6 (15)        | 5 (9)    |
|                           | 70 (70)          | 10 (36)  | 10 (30)     | 81 (47)  | 0 (2)         | 0 (5)    | 50 (70)          | 10 (36)   | 15 (31)     | 85 (40)  | 0 (5)         | 0 (5)    |
|                           | 171 (16)         | 118 (32) | 71 (19)     | 118 (32) | 169 (23)      | 118 (32) | 174 (28)         | 129 (36)  | 174 (27)    | 129 (36) | 172 (30)      | 129 (36) |
| Week 3                    | 67 (31)          | 16 (23)  | 18 (22)     | 80 (25)  | 5 (13)        | 4 (11)   | 57 (32)          | 21 (25)   | 25 (26)     | 77 (25)  | 5 (13)        | 3 (7)    |
|                           | 80 (55)          | 5 (25)   | 10 (30)     | 91 (30)  | 0 (0)         | 0 (1)    | 60 (60)          | 10 (36)   | 20 (35)     | 85 (36)  | 0 (3)         | 0 (1)    |
|                           | 171 (26)         | 118 (27) | 171 (30)    | 118 (27) | 169 (28)      | 118 (27) | 174 (24)         | 129 (35)  | 174 (25)    | 129 (35) | 172 (30)      | 129 (35) |
| Week 5                    | 70 (30)          | 15 (22)  | 18 (24)     | 83 (22)  | 4 (13)        | 2 (8)    | 62 (31)          | 18 (26)   | 23 (25)     | 80 (26)  | 4 (12)        | 3 (10)   |
|                           | 80 (45)          | 6 (21)   | 10 (25)     | 91 (26)  | 0 (0)         | 0 (1)    | 63 (50)          | 4 (32)    | 10 (39)     | 93 834   | 0 (0)         | 0 (0)    |
|                           | 171 (36)         | 118 (43) | 171 (38)    | 118 (43) | 169 (42)      | 118 (43) | 174 (44)         | 129 (36)  | 174 (47)    | 129 (36) | 172 (46)      | 129 (36) |
| Week 8                    | 74 (30)          | 16 (23)  | 17 (24)     | 82 (24)  | 4 (13)        | 2 (6)    | 70 (29)          | 17 (24)   | 17 (21)     | 80 (25)  | 5 (13)        | 3 (11)   |
|                           | 90 (40)          | 4 (27)   | 10 (20)     | 93 (33)  | 0 (0)         | 0 (0)    | 80 (40)          | 3 (33)    | 10 (20)     | 92 (36)  | 0 (0)         | 0 (0)    |
|                           | 171 (53)         | 118 (48) | 171 (56)    | 118 (48) | 171 (59)      | 118 (48) | 174 (44)         | 129 (43)  | 174 (49)    | 129 (43) | 174 (52)      | 129 (43) |
| Week 12                   | 75 (30)          | 15 (23)  | 17 (25)     | 83 (24)  | 4 (13)        | 1 (5)    | 73 (29)          | 16 (23)   | 16 (20)     | 82 (23)  | 5 (13)        | 2 (6)    |
|                           | 90 (40)          | 4 (22)   | 5 (20)      | 96 (23)  | 0 (0)         | 0 (0)    | 80 (38)          | 3 (29)    | 10 (20)     | 93 (32)  | 0 (0)         | 0 (0)    |
|                           | 171(115)         | 118 (89) | 171(118)    | 118 (89) | 171(119)      | 118 (89) | 174(124)         | 129(102)  | 174(125)    | 129(102) | 172(126)      | 129(102) |
| Week 16                   | 77 (30)          | 13 (22)  | 14 (22)     | 86 (24)  | 3 (10)        | 1 (6)    | 76 (30)          | 17 (24)   | 15 (24)     | 81 (24)  | 3 (13)        | 2 (6)    |
|                           | 90 (40)          | 1 (17)   | 2 (20)      | 98 (19)  | 0 (0)         | 0 (0)    | 90 (40)          | 4 (31)    | 5 (20)      | 93 (35)  | 0 (0)         | 0 (0)    |
|                           | 171 (78)         | 118 (66) | 171 (79)    | 118 (66) | 171 (82)      | 118 (66) | 174 (62)         | 129 (576) | 174 (65)    | 129 (56) | 174 (66)      | 129 (56) |

1  
2 | Table [S4S6](#): Wound tissue composition at each observation time point during the study treatment time of maximum 16 week in the ITT-population. Wound tissue (granulation, fibrin, and necrosis)  
3 is separately shown for the data documented in the eCRF and for the data derived from the photo analysis using the Wound Healing Analyzing Tool (W.H.A.T.). Data show mean (SD) and median  
4 (IQR) as well the number (N) of values analyzed for the ITT population (number (N) of values substituted by the last observation carried forward (LOCF) method).  
5  
6  
7  
8  
9  
10  
11  
12  
13  
14  
15  
16  
17  
18  
19  
20  
21  
22  
23  
24  
25  
26  
27  
28  
29  
30  
31  
32  
33  
34  
35  
36  
37  
38  
39  
40  
41  
42  
43  
44  
45  
46

For peer review only

| Observation time point | Pain Total<br>N=344               | Pain NPWT<br>N=171               | Pain SMWC<br>N=173               |
|------------------------|-----------------------------------|----------------------------------|----------------------------------|
| Screening              | 2·1 (2·4)<br>1 (4)<br>N=344 (0)   | 2·1 (2·3)<br>1 (4)<br>N=171 (0)  | 2·1 (2·4)<br>1 (4)<br>N=173 (0)  |
| Week 1                 | 1·7 (2·2)<br>1 (3)<br>N=344 (6)   | 1·6 (2·2)<br>0 (2)<br>N=171 (1)  | 1·8 (2·2)<br>1 (3)<br>N=173 (5)  |
| Week 3                 | 1·5 (2·0)<br>1 (2)<br>N=344 (27)  | 1·3 (1·9)<br>0 (2)<br>N=171 (11) | 1·7 (2·1)<br>1 (3)<br>N=173 (16) |
| Week 5                 | 1·3 (1·9)<br>0 (2)<br>N=344 (45)  | 1·2 (1·9)<br>0 (2)<br>N=171 (21) | 1·4 (2·0)<br>0 (2)<br>N=173 (24) |
| Week 8                 | 1·3 (1·9)<br>0 (2)<br>N=344 (70)  | 1·2 (1·9)<br>0 (2)<br>N=171 (38) | 1·3 (1·9)<br>0 (2)<br>N=173 (32) |
| Week 12                | 1·1 (1·8)<br>0 (2)<br>N=344 (115) | 1·2 (1·9)<br>0 (2)<br>N=171 (64) | 1·1 (1·8)<br>0 (2)<br>N=173 (51) |
| Week 16                | 1·0 (1·7)<br>0 (1)<br>N=344 (129) | 1·0 (1·7)<br>0 (2)<br>N=171 (76) | 0·9 (1·7)<br>0 (1)<br>N=173 (53) |

Table SSS7: Pain in the course of the study treatment time of maximum 16 weeks in the ITT-population. Pain evaluation at the pre-defined observation time points during the active study treatment time of 16 weeks in the ITT population. Data show mean (SD) and median (IQR) as well the number (N) of values analyzed for the ITT population (number (N) of values substituted by the last observation carried forward (LOCF) method).

| Observation time point | EQ5D NPWT                              | EQ5D SMWC                               |
|------------------------|----------------------------------------|-----------------------------------------|
| Screening              | 0,53 (0,27)<br>0,53 (0,2)<br>N=156 (2) | 0,53 (0,24)<br>0,53 (0,18)<br>N=159 (3) |
| End of therapy         | 0,67 (0,24)<br>0,77 (0,29)<br>N=62 (2) | 0,72 (0,17)<br>0,66 (0,35)<br>N=13 (0)  |

|                                     |             |             |
|-------------------------------------|-------------|-------------|
| End of maximum study treatment time | 0,66 (0,22) | 0,61 (0,25) |
|                                     | 0,66 (0,28) | 0,63 (0,24) |
|                                     | N=63 (2)    | N=95 (2)    |
| Follow up after 6 months            | 0,69 (0,26) | 0,67 (0,23) |
|                                     | 0,77 (0,35) | 0,63 (0,39) |
|                                     | N=93 (3)    | N=97 (2)    |

Table S6S8: Quality of life (EQ5D) in the course of the study treatment time of 16 week in the ITT-population. Quality of life evaluated with the EQ5D instrument at the pre-defined observation time points during the active study treatment time of 16 weeks in the ITT-population. Data show mean (SD) and median (IQR) as well the number (N) of values analyzed for the ITT population (number (N) of values substituted by the last observation carried forward (LOCF) method).

| <b><u>Adverse Events (AE)</u></b>                              | <b><u>Total</u></b><br><b><u>N=269</u></b> | <b><u>NPWT</u></b><br><b><u>N=167</u></b> | <b><u>SMWC</u></b><br><b><u>N=102</u></b> |
|----------------------------------------------------------------|--------------------------------------------|-------------------------------------------|-------------------------------------------|
| <b><u>Day of occurrence (N<sub>available</sub>)</u></b>        | <b><u>269</u></b>                          | <b><u>167</u></b>                         | <b><u>102</u></b>                         |
| <b><u>Mean (SD)</u></b>                                        | <b><u>39.5 (28.9)</u></b>                  | <b><u>37.5 (28.6)</u></b>                 | <b><u>42.7 (29.2)</u></b>                 |
| <b><u>Median (IQR)</u></b>                                     | <b><u>34.0 (42)</u></b>                    | <b><u>30.0 (40.0)</u></b>                 | <b><u>38.0 (50.0)</u></b>                 |
| <b><u>Duration in days (N<sub>available</sub>)</u></b>         | <b><u>254</u></b>                          | <b><u>157</u></b>                         | <b><u>97</u></b>                          |
| <b><u>Mean (SD)</u></b>                                        | <b><u>21.9 (33.0)</u></b>                  | <b><u>19.7 (29.0)</u></b>                 | <b><u>25.3 (38.6)</u></b>                 |
| <b><u>Median (IQR)</u></b>                                     | <b><u>11.0 (21)</u></b>                    | <b><u>10.0 (20.0)</u></b>                 | <b><u>13.0 (22.0)</u></b>                 |
| <b><u>Severity (N<sub>available</sub>)</u></b>                 | <b><u>263</u></b>                          | <b><u>161</u></b>                         | <b><u>102</u></b>                         |
| <b><u>Mild</u></b>                                             | <b><u>88 (33.5%)</u></b>                   | <b><u>64 (39.8%)</u></b>                  | <b><u>24 (23.5%)</u></b>                  |
| <b><u>Moderate</u></b>                                         | <b><u>92 (35.0%)</u></b>                   | <b><u>54 (33.5%)</u></b>                  | <b><u>38 (37.3%)</u></b>                  |
| <b><u>Severe</u></b>                                           | <b><u>83 (31.6%)</u></b>                   | <b><u>43 (26.7%)</u></b>                  | <b><u>40 (39.2%)</u></b>                  |
| <b><u>AE expected / unexpected (N<sub>available</sub>)</u></b> | <b><u>259</u></b>                          | <b><u>159</u></b>                         | <b><u>100</u></b>                         |
| <b><u>Expected</u></b>                                         | <b><u>79 (30.5%)</u></b>                   | <b><u>52 (32.7%)</u></b>                  | <b><u>27 (27.0%)</u></b>                  |
| <b><u>Unexpected</u></b>                                       | <b><u>180 (69.5%)</u></b>                  | <b><u>107 (67.3%)</u></b>                 | <b><u>73 (73.0%)</u></b>                  |
| <b><u>Action taken (N<sub>available</sub>)</u></b>             | <b><u>240</u></b>                          | <b><u>146</u></b>                         | <b><u>94</u></b>                          |
| <b><u>No</u></b>                                               | <b><u>46 (19.2%)</u></b>                   | <b><u>23 (15.8%)</u></b>                  | <b><u>23 (24.5%)</u></b>                  |
| <b><u>Yes</u></b>                                              | <b><u>194 (80.8%)</u></b>                  | <b><u>123 (84.2%)</u></b>                 | <b><u>71 (75.5%)</u></b>                  |
| <b><u>Cessation of therapy</u></b>                             | <b><u>10 of 194 (5.2%)</u></b>             | <b><u>10 of 123 (8.1%)</u></b>            | <b><u>0 of 71 (0%)</u></b>                |
| <b><u>Temporary interruption of therapy</u></b>                | <b><u>30 of 194 (15.5%)</u></b>            | <b><u>28 of 123 (22.8%)</u></b>           | <b><u>2 of 71 (2.8%)</u></b>              |
| <b><u>Adaptation of therapy / treatment</u></b>                | <b><u>100 of 194 (51.5%)</u></b>           | <b><u>52 of 123 (42.3%)</u></b>           | <b><u>48 of 71 (67.6%)</u></b>            |
| <b><u>Other</u></b>                                            | <b><u>54 of 194 (27.8%)</u></b>            | <b><u>33 of 123 (26.8%)</u></b>           | <b><u>21 of 71 (29.6%)</u></b>            |
| <b><u>Outcome (N<sub>available</sub>)</u></b>                  | <b><u>244</u></b>                          | <b><u>148</u></b>                         | <b><u>96</u></b>                          |
| <b><u>Fixed without consequences</u></b>                       | <b><u>115 (47.1%)</u></b>                  | <b><u>72 (48.6%)</u></b>                  | <b><u>43 (44.8%)</u></b>                  |
| <b><u>Condition improved</u></b>                               | <b><u>58 (23.8%)</u></b>                   | <b><u>32 (21.6%)</u></b>                  | <b><u>26 (27.1%)</u></b>                  |
| <b><u>Fixed with consequences</u></b>                          | <b><u>34 (13.9%)</u></b>                   | <b><u>22 (14.9%)</u></b>                  | <b><u>12 (12.5%)</u></b>                  |
| <b><u>Not fixed</u></b>                                        | <b><u>7 (2.9%)</u></b>                     | <b><u>4 (2.7%)</u></b>                    | <b><u>3 (3.1%)</u></b>                    |
| <b><u>Death</u></b>                                            | <b><u>15 (6.1%)</u></b>                    | <b><u>9 (6.1%)</u></b>                    | <b><u>6 (6.3%)</u></b>                    |
| <b><u>Unknown</u></b>                                          | <b><u>15 (6.1%)</u></b>                    | <b><u>9 (6.1%)</u></b>                    | <b><u>6 (6.3%)</u></b>                    |



Table S9: The table shows details on the adverse events (AEs) documented during the active study treatment time of 112 days after randomization. Data are Number (N) and Percentage (%), Mean and Standard Deviation (SD), and Median and Interquartile Range (IQR).

| Wound surface area<br>mm <sup>2</sup> | Small wounds   |              |              |       | Big wounds     |              |              |       |
|---------------------------------------|----------------|--------------|--------------|-------|----------------|--------------|--------------|-------|
|                                       | Total<br>N=173 | NPWT<br>N=83 | SMWC<br>N=90 | p     | Total<br>N=172 | NPWT<br>N=88 | SMWC<br>N=84 | p     |
| N (LOCF)                              | 2              | 2            | 0            | 0.232 | 0              | 0            | 0            | 0.193 |
| Mean (SD)                             | 213 (136)      | 212 (138)    | 213 (135)    |       | 1995 (3377)    | 1860 (1805)  | 2135 (4474)  |       |
| Median (IQR)                          | 188 (220)      | 176 (220)    | 196 (222)    |       | 1276 (1482)    | 1364 (1242)  | 1242 (1708)  |       |
| Min - Max                             | 12-484         | 20-484       | 12-471       |       | 491-40773      | 520-13188    | 491-40773    |       |

Table S7S10: Wound surface area for small and big wounds. Data show the number (N) of participants available for the analysis in total and for both treatment arms, the number (N) of values substituted by the last observation carried forward (LOCF) method; mean (SD), median (IQR); and minimum (min) and maximum (max).

| Wound closure rate<br>Small wounds           | NPWT (N=171)<br>N=83 | SMWC (N=174)<br>N=90 | p    |
|----------------------------------------------|----------------------|----------------------|------|
| Within 16 weeks maximum study treatment time | 12 (14.5 %)          | 16 (17.8 %)          | 0.6  |
| At follow up after 6 months                  | 13 (15.7 %)          | 24 (26.7 %)          | 0.10 |

Table S118: Wound closure rates within the maximum study treatment time of 16 weeks and within the study observation time of 6 months for small wounds. Data show the number (N) of participants available for the analysis in total and for both treatment arms and the number of patients with wound closure (N) within 16 weeks and after 6 months as well the percentage (%) of patients achieving the endpoints within both treatment arms.

| Wound closure rate<br>Big wounds             | NPWT (N=171)<br>N=88 | SMWC (N=174)<br>N=84 | P    |
|----------------------------------------------|----------------------|----------------------|------|
| Within 16 weeks maximum study treatment time | 13 (14.8 %)          | 5 (6.0 %)            | 0.08 |
| At follow up after 6 months                  | 11 (12.5 %)          | 12 (14.3 %)          | 0.82 |

Table S9S12: Wound closure rates within the maximum study treatment time of 16 weeks and within the study observation time of 6 months for big wounds. Data show the number (N) of participants available for the analysis in total and for both treatment arms and the number of patients with wound closure (N) within 16 weeks and after 6 months as well the percentage (%) of patients achieving the endpoints within both treatment arms.

| Time until min. 95 %<br>granulation tissue for small<br>wounds | Total (N=100) | NPWT (N=52) | SMWC (N=48) | p |
|----------------------------------------------------------------|---------------|-------------|-------------|---|
|                                                                |               |             |             |   |

|              |             |             |             |       |
|--------------|-------------|-------------|-------------|-------|
| Mean (SD)    | 38.6 (37.4) | 28.5 (30.0) | 49.5 (41.6) | 0.005 |
| Median (IQR) | 26.5 (50.0) | 20.0 (28.0) | 48.0 (79.0) |       |
| Min-Max      | 0-114       | 0-113       | 0-114       |       |

Table S10S13: Time until optimal preparation of the wound bed (min. 95 % granulation tissue) for the subgroup of small wounds. Data show the number (N) of participants available for the analysis in total and for both treatment arms; mean (SD); median (IQR); and minimum (min) and maximum (max).

| Time until min 95 % granulation tissue for big wounds | Total (N=80) | NPWT (N=47) | SMWC (N=33)  | p    |
|-------------------------------------------------------|--------------|-------------|--------------|------|
| Mean (SD)                                             | 47.8 (40.8)  | 43.4 (37.9) | 54.0 (44.6)  | 0.27 |
| Median (IQR)                                          | 36.5 (70.0)  | 35.0 (61.0) | 56.0 (105.0) |      |
| Min-Max                                               | 0-127        | 0-127       | 0-115        |      |

Table S-1414: Time until optimal preparation of the wound bed (min 95 % granulation tissue) for the subgroup of big wounds. Data show the number (N) of participants available for the analysis in total and for both treatment arms; mean (SD); median (IQR); and minimum (min) and maximum (max).

| Amputations & Resections<br>Small wounds               | Total<br>N=173 | NPWT<br>N=83 | SMWC<br>N=90 | p        |
|--------------------------------------------------------|----------------|--------------|--------------|----------|
| No. of patients with amputations or resections [N (%)] | 35 (20.2%)     | 19 (22.9%)   | 16 (17.8%)   | 0.45 (F) |
| No. of performed amputations and resections [N]        | 50             | 22           | 28           | 0.51 (U) |
| No. of patients with minor amputations [N (%)]         | 35 (20.2%)     | 19 (22.9%)   | 16 (17.8%)   | 0.45 (F) |
| No. of patients with major amputations [N (%)]         | 0 (0%)         | 0 (0%)       | 0 (0%)       | -        |

Table S12S15: Amputations and resections in the subgroup of small wounds. Data show the number (N) of participants available for the analysis in total and for both treatment arms and the number (N) and the percentage (%) of patients with amputations or resections and minor and major amputations.

| Amputations & Resections<br>Big wounds                 | Total<br>N=172 | NPWT<br>N=88 | SMWC<br>N=84 | p        |
|--------------------------------------------------------|----------------|--------------|--------------|----------|
| No. of patients with amputations or resections [N (%)] | 36 (20.9%)     | 16 (18.2%)   | 20 (23.8%)   | 0.45 (F) |
| No. of performed amputations and resections [N]        | 52             | 45           | 57           | 0.41 (U) |
| No. of patients with minor amputations [N (%)]         | 34 (19.8%)     | 14 (15.9%)   | 20 (23.8%)   | 0.25 (F) |
| No. of patients with major amputations [N (%)]         | 2 (1.2%)       | 2 (2.3%)     | 0 (0%)       | 0.50 (F) |

Table S13S16: Amputations and resections in the subgroup of big wounds. Data show the number (N) of participants available for the analysis in total and for both treatment arms and the number (N) and the percentage (%) of patients with amputations or resections and minor and major amputations.

| Wound closure rate                     | Total<br>N=154 | NPWT<br>N=44 | SMWC<br>N=110 | p     |
|----------------------------------------|----------------|--------------|---------------|-------|
| Wound closures [N (%)] within 16 weeks | 33 (21.4 %)    | 14 (31.8%)   | 19 (17.3%)    | 0.053 |
| Wound closures [N (%)] after 6 months  | 41 (26.6 %)    | 11 (25.0%)   | 30 (27.3%)    | 0.84  |

Table S14S17: Wound closure rate after 6 months and in the PP-population. Data show the number (N) of participants available for the analysis in total and for both treatment arms and the number (N) and the percentage (%) of patients with wound closures within 16 weeks and after 6 months.

| Time until min. 95 % granulation tissue | Total (N=100) | NPWT (N=38) | SMWC (N=62) | p      |
|-----------------------------------------|---------------|-------------|-------------|--------|
| Mean (SD)                               | 43.8 (42.3)   | 23.8 (31.7) | 56.0 (43.5) | <0.001 |
| Median (IQR)                            | 30.0 (76)     | 8.5 (28.0)  | 56.0 (96.0) |        |
| Min - Max                               | 0 - 127       | 0 - 127     | 0 - 115     |        |

Table S15S18: Time until optimal preparation of the wound for further treatment (min 95 % granulation tissue) in the PP-population. Data show the number (N) of participants available for the analysis in total and for both treatment arms; mean (SD); median (IQR); and minimum (min) and maximum (max).

| Recurrences                              | Total (N=154) | NPWT (N=44) | SMWC (N=110) | p    |
|------------------------------------------|---------------|-------------|--------------|------|
| No. of patients with recurrences [N (%)] | 8 (5.2 %)     | 3 (8.1 %)   | 5 (5.3%)     | 0.69 |
| No. of recurrences [N]                   | 9             | 4           | 5            | 0.38 |

Table S16S19: Recurrences in the PP-population. Data show the number (N) of participants available for the analysis in total and for both treatment arms and the number (N) and the percentage (%) of patients with recurrences.

| Amputations & Resections                             | Total (N=154) | NPWT (N=44) | SMWC (N=110) | p    |
|------------------------------------------------------|---------------|-------------|--------------|------|
| No. of patients with amputation or resection [N (%)] | 30 (19.5%)    | 9 (20.5%)   | 21 (21.4%)   | 0.83 |
| No. of amputations or resections [N]                 | 39            | 11          | 28           | 0.86 |
| No. of patients with Minor-Amputations [N (%)]       | 30 (18.9%)    | 9 (12.8%)   | 21 (21.4%)   | 0.83 |
| No. of patients with Major-Amputations [N (%)]       | 0 (0%)        | 0 (0%)      | 0 (0%)       | -    |

Table S17S20: Amputations and resections in the PP-population. Data show the number (N) of participants available for the analysis in total and for both treatment arms and the number (N) and the percentage (%) of patients with amputations or resections and minor and major amputations.

|                        | Wound surface NPWT                                         |                                     | Wound surface SMWC                     |                                                            |
|------------------------|------------------------------------------------------------|-------------------------------------|----------------------------------------|------------------------------------------------------------|
| Observation time point | Calculated from width and length (according to eCRF entry) | Results of the photo analysis       | Observation time point                 | Calculated from width and length (according to eCRF entry) |
| Randomization          | 964 (1392)<br>345 (1426)<br>N= 44 (1)                      | 633 (795)<br>299 (705)<br>N=41 (3)  | 878 (1266)<br>373 (889)<br>N= 110 (0)  | 669 (1143)<br>294 (692)<br>N=102 (9)                       |
| Week 1                 | 525 (696)<br>224 (408)<br>N= 44 (5)                        | 524 (614)<br>318 (561)<br>N=41 (8)  | 827 (1238)<br>306 (863)<br>N= 110 (16) | 706 (1138)<br>289 (775)<br>N=102 (27)                      |
| Week 3                 | 428 (635)<br>176 (378)<br>N= 44 (6)                        | 477 (737)<br>165 (424)<br>N=41 (9)  | 803 (1306)<br>238 (867)<br>N= 110 (7)  | 714 (1316)<br>259 (656)<br>N=102 (26)                      |
| Week 5                 | 355 (590)<br>100 (291)<br>N= 44 (8)                        | 418 (602)<br>165 (435)<br>N=41 (15) | 650 (1157)<br>161 (670)<br>N= 110 (18) | 607 (1212)<br>167 (545)<br>N=102 (29)                      |
| Week 8                 | 284 (528)<br>53 (217)<br>N= 44 (8)                         | 320 (530)<br>83 (264)<br>N=41 (16)  | 569 (1072)<br>106 (443)<br>N= 110 (17) | 479 (990)<br>123 (397)<br>N=102 (29)                       |
| Week 12                | 283 (580)<br>14 (130)<br>N= 44 (24)                        | 289 (537)<br>62 (175)<br>N=41 (32)  | 528 (1024)<br>79 (419)<br>N= 110 (71)  | 474 (1006)<br>111 (407)<br>N=102 (80)                      |
| Week 16                | 190 (416)<br>0 (95)<br>N= 44 (14)                          | 179 (333)<br>30 (204)<br>N=41 (25)  | 386 (1124)<br>31 (159)<br>N= 110 (19)  | 319 (724)<br>65 (256)<br>N=102 (42)                        |

Table S1821: Wound surface area at each observation time point during the study treatment time of maximum 16 weeks separately shown for the calculated data from width and length as documented in the eCRF and for the data derived from the photo analysis using W.H.A.T. Data show mean (SD) and median (IQR) as well the number (N) of values analyzed for the PP population (number (N) of values substituted by the last observation carried forward (LOCF) method).

| Observation time point | Wound volume NPWT (mm <sup>3</sup> )      | Wound volume SMWC (mm <sup>3</sup> )       |
|------------------------|-------------------------------------------|--------------------------------------------|
| Randomization          | 33359 (95749)<br>5746 (17330)<br>N=44 (1) | 14742 (36523)<br>3905 (11189)<br>N=110 (0) |

|         |                                          |                                            |
|---------|------------------------------------------|--------------------------------------------|
| Week 1  | 11606 (26991)<br>1824 (6113)<br>N=44 (5) | 13525 (34844)<br>2470 (9479)<br>N=110 (16) |
| Week 3  | 8636 (24698)<br>777 (3199)<br>N=44 (6)   | 11907 (32047)<br>1864 (8039)<br>N=110 (7)  |
| Week 5  | 5480 (13967)<br>271 (1790)<br>N=44 (7)   | 8981 (25570)<br>1027 (4745)<br>N=110 (18)  |
| Week 8  | 3955 (9056)<br>192 (809)<br>N=44 (16)    | 6899 (18607)<br>506 (3915)<br>N=110 (29)   |
| Week 12 | 6052 (16114)<br>71 (681)<br>N=44 (25)    | 5964 (15930)<br>361 (1890)<br>N=110 (77)   |
| Week 16 | 3246 (11245)<br>0 (319)<br>N=44 (15)     | 3396 (10783)<br>57 (609)<br>N=110 (19)     |

Table S2219: Wound volume (length x width x depth) for each observation time point during the study treatment time of maximum 16 weeks calculated from width· length and depth as documented in the eCRF. Data show mean (SD) and median (IQR) as well the number (N) of values analyzed for the PP population (number (N) of values substituted by the last observation carried forward (LOCF) method).

| Observation<br>time point | NPWT Granulation |          | NPWT Fibrin |          | NPWT Necrosis |          | SMWC Granulation |          | SMWC Fibrin |          | SMWC Necrosis |          |
|---------------------------|------------------|----------|-------------|----------|---------------|----------|------------------|----------|-------------|----------|---------------|----------|
|                           | eCRF             | W.H.A.T. | eCRF        | W.H.A.T. | eCRF          | W.H.A.T. |                  | eCRF     | W.H.A.T.    | eCRF     | W.H.A.T.      | eCRF     |
| Rando                     | 32 (37)          | 23 (26)  | 18 (27)     | 68 (27)  | 2 (7)         | 9 (15)   | 38 (38)          | 26 (27)  | 21 (29)     | 67 (29)  | 1 (7)         | 7 (15)   |
|                           | 10 (68)          | 13 (37)  | 3 (28)      | 69 (45)  | 0 (0)         | 0 (15)   | 25 (80)          | 16 (42)  | 10 (33)     | 77 (56)  | 0 (0)         | 0 (8)    |
|                           | 44 (1)           | 41 (2)   | 44 (1)      | 41 (2)   | 44 (1)        | 41 (2)   | 110 (0)          | 102 (9)  | 110 (0)     | 102 (9)  | 108 (2)       | 102 (9)  |
| Week 1                    | 72 (37)          | 22 (26)  | 7 (13)      | 70 (28)  | 2 (7)         | 9 (15)   | 54 (35)          | 24 (27)  | 22 (24)     | 72 (27)  | 5 (14)        | 5 (9)    |
|                           | 90 (50)          | 9 (41)   | 0 (10)      | 75 (50)  | 0 (0)         | 0 (11)   | 63 (70)          | 13 (42)  | 13 (28)     | 78 (42)  | 0 (1)         | 0 (6)    |
|                           | 44 (5)           | 41 (8)   | 44 (6)      | 41 (8)   | 44 (7)        | 41 (8)   | 110 (16)         | 102 (27) | 110 (16)    | 102 (27) | 108 (19)      | 102 (27) |
| Week 3                    | 77 (32)          | 16 (24)  | 11 (19)     | 79 (26)  | 1 (4)         | 6 (14)   | 61 (31)          | 24 (27)  | 25 (25)     | 75 (26)  | 4 (11)        | 3 (7)    |
|                           | 93 (34)          | 2 (29)   | 0 (20)      | 91 (37)  | 0 (0)         | 0 (1)    | 70 (50)          | 15 (42)  | 20 (35)     | 83 (41)  | 0 (0)         | 0 (1)    |
|                           | 44 (6)           | 41 (9)   | 44 (7)      | 41 (9)   | 44 (7)        | 41 (9)   | 110 (9)          | 102 (26) | 110 (10)    | 102 (26) | 108 (13)      | 102 (26) |
| Week 5                    | 82 (29)          | 10 (16)  | 9 (19)      | 87 (17)  | 1 (4)         | 3 (9)    | 65 (29)          | 19 (27)  | 24 (24)     | 78 (27)  | 3 (9)         | 3 (11)   |
|                           | 95 (20)          | 4 (11)   | 2 (10)      | 93 (21)  | 0 (0)         | 0 (1)    | 73 (46)          | 4 (34)   | 13 (37)     | 93 (35)  | 0 (0)         | 0 (0)    |
|                           | 44 (7)           | 41 (16)  | 44 (8)      | 41 (16)  | 44 (9)        | 41 (16)  | 110 (19)         | 102 (27) | 110 (22)    | 102 (27) | 108 (22)      | 102 (27) |
| Week 8                    | 85 (27)          | 15 (25)  | 6 (13)      | 82 (26)  | 2 (6)         | 3 (8)    | 74 (27)          | 20 (26)  | 18(21)      | 77 (27)  | 3 (10)        | 3 (12)   |
|                           | 100 (20)         | 1 (16)   | 0 (5)       | 96 (35)  | 0 (0)         | 0 (0)    | 80 (31)          | 3 (38)   | 10 (18)     | 91 (43)  | 0 (0)         | 0 (0)    |
|                           | 44 (9)           | 41 (16)  | 44 (10)     | 41 (16)  | 44 (9)        | 41 (16)  | 110 (18)         | 102 (30) | 110 (21)    | 102 (30) | 108 (25)      | 102 (30) |
| Week 12                   | 86 (26)          | 13 (24)  | 6 (14)      | 85 (26)  | 2 (9)         | 2 (6)    | 77 (27)          | 18 (25)  | 16 (20)     | 80 (25)  | 3 (11)        | 2 (6)    |
|                           | 100 (18)         | 1 (13)   | 0 (4)       | 99 (20)  | 0 (0)         | 0 (0)    | 85 (29)          | 3 (36)   | 10 (20)     | 92 (36)  | 0 (0)         | 0 (0)    |
|                           | 44 (26)          | 41 (34)  | 44 (26)     | 41 (32)  | 44 (28)       | 41 (32)  | 110 (72)         | 101 (78) | 110 (73)    | 102 (79) | 108 (73)      | 102 (80) |
| Week 16                   | 87 (25)          | 12 (22)  | 6 (14)      | 86 (24)  | 0·1 (1)       | 1 (6)    | 80 (30)          | 19 (25)  | 14 (24)     | 80 (26)  | 2 (11)        | 1 (5)    |
|                           | 100 (15)         | 0 (14)   | 0 (1)       | 100 (20) | 0 (0)         | 0 (0)    | 95 (20)          | 5 (36)   | 0 (20)      | 92 (36)  | 0 (0)         | 0 (0)    |
|                           | 44 (14)          | 41 (25)  | 44 (16)     | 41 (25)  | 44 (15)       | 41 (25)  | 110 (18)         | 102 (42) | 110 (21)    | 102 (42) | 108 (24)      | 102 (42) |

1  
2 | Table S2320: Wound tissue (granulation, fibrin, necrosis) at each observation time point during the study treatment time of maximum 16 weeks separately shown for the data documented in the  
3 eCRF and for the data derived from the photo analysis using the wound healing analyzing too (W.H.A.T.). Data show mean (SD) and median (IQR) as well the number (N) of values analyzed for the  
4 PP population (number (N) of values substituted by the last observation carried forward (LOCF) method).  
5  
6  
7  
8  
9  
10  
11  
12  
13  
14  
15  
16  
17  
18  
19  
20  
21  
22  
23  
24  
25  
26  
27  
28  
29  
30  
31  
32  
33  
34  
35  
36  
37  
38  
39  
40  
41  
42  
43  
44  
45  
46

For peer review only

| Observation time point | Pain Total<br>N=344             | Pain NPWT<br>N=171               |
|------------------------|---------------------------------|----------------------------------|
| Screening              | 1.3 (2.1)<br>0 (2)<br>N=44 (0)  | 1.8 (2.3)<br>1 (3)<br>N=110 (0)  |
| Week 1                 | 0.7 (1.5)<br>0 (1)<br>N=44 (0)  | 1.4 (2.1)<br>0 (3)<br>N=110 (5)  |
| Week 3                 | 0.4 (0.7)<br>0 (1)<br>N=44 (4)  | 1.3 (1.8)<br>0 (2)<br>N=110 (3)  |
| Week 5                 | 0.3 (0.8)<br>0 (0)<br>N=44 (2)  | 1.0 (1.6)<br>0 (2)<br>N=110 (5)  |
| Week 8                 | 0.4 (1.1)<br>0 (0)<br>N=44 (4)  | 0.9 (1.5)<br>0 (2)<br>N=110 (9)  |
| Week 12                | 0.3 (1.0)<br>0 (0)<br>N=44 (11) | 0.7 (1.3)<br>0 (1)<br>N=110 (18) |
| Week 16                | 0.2 (0.7)<br>0 (0)<br>N=44 (14) | 0.5 (1.2)<br>0 (0)<br>N=110 (13) |

Table S2424: Pain evaluation at the pre-defined observation time points during the active study treatment time of 16 weeks in the PP population. Data show mean (SD) and median (IQR) as well the number (N) of values analyzed for the PP population (number (N) of values substituted by the last observation carried forward (LOCF) method).

| Observation time point              | EQ5D NPWT                              | EQ5D SMWC                               |
|-------------------------------------|----------------------------------------|-----------------------------------------|
| Screening                           | 0.61 (0.23)<br>0.63 (0.24)<br>N=42 (1) | 0.60 (0.20)<br>0.59 (0.25)<br>N=100 (3) |
| End of therapy                      | 0.65 (0.20)<br>0.78 (0.20)<br>N=26 (2) | 0.81 (0.14)<br>0.87 (0.26)<br>N=8 (0)   |
| End of maximum study treatment time | 0.65 (0.25)                            | 0.66 (0.21)                             |



|                          |                                        |                                        |
|--------------------------|----------------------------------------|----------------------------------------|
|                          | 0·66 (0·43)<br>N=19 (0)                | 0·63 (0·28)<br>N=73 (2)                |
| Follow up after 6 months | 0·75 (0·22)<br>0·78 (0·30)<br>N=26 (0) | 0·70 (0·23)<br>0·77 (0·34)<br>N=73 (2) |

Table S2522: Quality of life evaluated with the EQ5D instrument at the pre-defined observation time points during the active study treatment time of 16 weeks in the PP population. Data show mean (SD) and median (IQR) as well the number (N) of values analyzed for the PP population (number (N) of values substituted by the last observation carried forward (LOCF) method).

### Supplementary Discussion

As direct blinding of patients and investigators was not possible due to the nature of the applied treatment methods, issues of blinding have been addressed using independent blinded outcome assessors and the W.H.A.T. for evaluating the wound photographs. For wound size and wound tissue, the values documented by the investigators reflect the expected course much better than the W.H.A.T. results. During study planning the W.H.A.T. (<http://www.what-world.com/>) was the only available validated instrument that was able to measure both wound size and wound tissue composition (granulation, fibrin, and necrosis). For the wound surface area, the difference between the clinical measurements and the W.H.A.T. results may have been caused by the different evaluation methods. An elliptical wound surface area was calculated by the investigators using length and width, but most wounds are not elliptical. The independent blinded assessors marked the wound margin on the photograph and the W.H.A.T. calculates the wound surface area automatically afterwards, thus if the wound photo is of good quality the W.H.A.T. is more precise. In addition, the depth of the wound cannot be assessed using a wound photo, thus wound volume has only been evaluated using the clinical measurements provided by the investigators. The values for granulation tissue and fibrin differ significantly between the clinical estimations and the W.H.A.T. results. This may be caused by the quality of the wound photography, the reliability and precision of both the clinical investigator and the W.H.A.T. system and the wound itself. Wounds with invisible, deeper areas cannot be detected without manipulation. Both circumstances possibly affect the results.

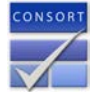

## CONSORT 2010 checklist of information to include when reporting a randomised trial\*

| Section/Topic                    | Item No | Checklist item                                                                                                                                                                              | Reported on page No |
|----------------------------------|---------|---------------------------------------------------------------------------------------------------------------------------------------------------------------------------------------------|---------------------|
| <b>Title and abstract</b>        |         |                                                                                                                                                                                             |                     |
|                                  | 1a      | Identification as a randomised trial in the title                                                                                                                                           | 1                   |
|                                  | 1b      | Structured summary of trial design, methods, results, and conclusions (for specific guidance see CONSORT for abstracts)                                                                     | 2                   |
| <b>Introduction</b>              |         |                                                                                                                                                                                             |                     |
| Background and objectives        | 2a      | Scientific background and explanation of rationale                                                                                                                                          | 3-5                 |
|                                  | 2b      | Specific objectives or hypotheses                                                                                                                                                           | 6                   |
| <b>Methods</b>                   |         |                                                                                                                                                                                             |                     |
| Trial design                     | 3a      | Description of trial design (such as parallel, factorial) including allocation ratio                                                                                                        | 6                   |
|                                  | 3b      | Important changes to methods after trial commencement (such as eligibility criteria), with reasons                                                                                          | 6,8,9               |
| Participants                     | 4a      | Eligibility criteria for participants                                                                                                                                                       | 6,7                 |
|                                  | 4b      | Settings and locations where the data were collected                                                                                                                                        | 6                   |
| Interventions                    | 5       | The interventions for each group with sufficient details to allow replication, including how and when they were actually administered                                                       | 7,8                 |
| Outcomes                         | 6a      | Completely defined pre-specified primary and secondary outcome measures, including how and when they were assessed                                                                          | 8,9                 |
|                                  | 6b      | Any changes to trial outcomes after the trial commenced, with reasons                                                                                                                       | n.a.                |
| Sample size                      | 7a      | How sample size was determined                                                                                                                                                              | 9,10                |
|                                  | 7b      | When applicable, explanation of any interim analyses and stopping guidelines                                                                                                                | n.a.                |
| <b>Randomisation:</b>            |         |                                                                                                                                                                                             |                     |
| Sequence generation              | 8a      | Method used to generate the random allocation sequence                                                                                                                                      | 7                   |
|                                  | 8b      | Type of randomisation; details of any restriction (such as blocking and block size)                                                                                                         | 7                   |
| Allocation concealment mechanism | 9       | Mechanism used to implement the random allocation sequence (such as sequentially numbered containers), describing any steps taken to conceal the sequence until interventions were assigned | 7                   |
| Implementation                   | 10      | Who generated the random allocation sequence, who enrolled participants, and who assigned participants to interventions                                                                     | 7                   |
| Blinding                         | 11a     | If done, who was blinded after assignment to interventions (for example, participants, care providers, those                                                                                | 7                   |

|                                                      |     |                                                                                                                                                   |                |
|------------------------------------------------------|-----|---------------------------------------------------------------------------------------------------------------------------------------------------|----------------|
|                                                      |     | assessing outcomes) and how                                                                                                                       |                |
|                                                      | 11b | If relevant, description of the similarity of interventions                                                                                       | n.a.           |
| Statistical methods                                  | 12a | Statistical methods used to compare groups for primary and secondary outcomes                                                                     | 10             |
|                                                      | 12b | Methods for additional analyses, such as subgroup analyses and adjusted analyses                                                                  | 10             |
| <b>Results</b>                                       |     |                                                                                                                                                   |                |
| Participant flow (a diagram is strongly recommended) | 13a | For each group, the numbers of participants who were randomly assigned, received intended treatment, and were analysed for the primary outcome    | 12 Fig. 1      |
|                                                      | 13b | For each group, losses and exclusions after randomisation, together with reasons                                                                  | Fig. 1         |
| Recruitment                                          | 14a | Dates defining the periods of recruitment and follow-up                                                                                           | 12             |
|                                                      | 14b | Why the trial ended or was stopped                                                                                                                | n.a.           |
| Baseline data                                        | 15  | A table showing baseline demographic and clinical characteristics for each group                                                                  | 12,13,14Tab. 1 |
| Numbers analysed                                     | 16  | For each group, number of participants (denominator) included in each analysis and whether the analysis was by original assigned groups           | Fig. 1         |
| Outcomes and estimation                              | 17a | For each primary and secondary outcome, results for each group, and the estimated effect size and its precision (such as 95% confidence interval) | 14-20          |
|                                                      | 17b | For binary outcomes, presentation of both absolute and relative effect sizes is recommended                                                       | 14-20          |
| Ancillary analyses                                   | 18  | Results of any other analyses performed, including subgroup analyses and adjusted analyses, distinguishing pre-specified from exploratory         | 18-19          |
| Harms                                                | 19  | All important harms or unintended effects in each group (for specific guidance see CONSORT for harms)                                             | 19-20          |
| <b>Discussion</b>                                    |     |                                                                                                                                                   |                |
| Limitations                                          | 20  | Trial limitations, addressing sources of potential bias, imprecision, and, if relevant, multiplicity of analyses                                  | 3,21-22        |
| Generalisability                                     | 21  | Generalisability (external validity, applicability) of the trial findings                                                                         | 22             |
| Interpretation                                       | 22  | Interpretation consistent with results, balancing benefits and harms, and considering other relevant evidence                                     | 21             |
| <b>Other information</b>                             |     |                                                                                                                                                   |                |
| Registration                                         | 23  | Registration number and name of trial registry                                                                                                    | 2              |
| Protocol                                             | 24  | Where the full trial protocol can be accessed, if available                                                                                       | 6              |
| Funding                                              | 25  | Sources of funding and other support (such as supply of drugs), role of funders                                                                   | 10-11          |

\*We strongly recommend reading this statement in conjunction with the CONSORT 2010 Explanation and Elaboration for important clarifications on all the items. If relevant, we also recommend reading CONSORT extensions for cluster randomised trials, non-inferiority and equivalence trials, non-pharmacological treatments, herbal interventions, and pragmatic trials. Additional extensions are forthcoming: for those and for up to date references relevant to this checklist, see [www.consort-statement.org](http://www.consort-statement.org).

# BMJ Open

## Negative Pressure Wound Therapy compared with standard moist wound care on diabetic foot ulcers in real-life clinical practice – Results of the German DiaFu-RCT

|                                 |                                                                                                                                                                                                                                                                                                                                                                                                                                                                                                                                                                                                                                                                                                                                                                                                                                                                                                                                                                                                                                                                                     |
|---------------------------------|-------------------------------------------------------------------------------------------------------------------------------------------------------------------------------------------------------------------------------------------------------------------------------------------------------------------------------------------------------------------------------------------------------------------------------------------------------------------------------------------------------------------------------------------------------------------------------------------------------------------------------------------------------------------------------------------------------------------------------------------------------------------------------------------------------------------------------------------------------------------------------------------------------------------------------------------------------------------------------------------------------------------------------------------------------------------------------------|
| Journal:                        | <i>BMJ Open</i>                                                                                                                                                                                                                                                                                                                                                                                                                                                                                                                                                                                                                                                                                                                                                                                                                                                                                                                                                                                                                                                                     |
| Manuscript ID                   | bmjopen-2018-026345.R3                                                                                                                                                                                                                                                                                                                                                                                                                                                                                                                                                                                                                                                                                                                                                                                                                                                                                                                                                                                                                                                              |
| Article Type:                   | Original research                                                                                                                                                                                                                                                                                                                                                                                                                                                                                                                                                                                                                                                                                                                                                                                                                                                                                                                                                                                                                                                                   |
| Date Submitted by the Author:   | 15-Jan-2020                                                                                                                                                                                                                                                                                                                                                                                                                                                                                                                                                                                                                                                                                                                                                                                                                                                                                                                                                                                                                                                                         |
| Complete List of Authors:       | Seidel, Dörthe; Universität Witten/Herdecke, Institut für Forschung in der Operativen Medizin (IFOM)<br>Storck, Martin; Städtisches Klinikum Karlsruhe gGmbH, Klinik für Gefäß- und Thoraxchirurgie<br>Lawall, Holger; Praxis für Herz-Kreislaufkrankungen; Max-Grundig Klinik<br>Wozniak, Gernold; Knappschaftskrankenhaus Bottrop GmbH, Gefäßchirurgische Klinik<br>Mauckner, Peter; St. Remigius Krankenhaus Opladen, Innere Medizin<br>Hochlenert, Dirk; Gemeinschaftspraxis Schlotmann-Hochlenert-Zavaleta-Haberstock<br>Wetzel-Roth, Walter; Chirurgische Praxis Wetzel-Roth<br>Sondern, Klemens; Marien Hospital Dortmund-Hombruch, Klinik für Innere Medizin/Diabetologie<br>Hahn, Matthias; Helfenstein Klinik, Allgemein- und Viszeralchirurgie<br>Rothenaicher, Gerhard; Chirurgische Praxis Rothenaicher<br>Krönert, Thomas; Thüringen-Kliniken "Georgius Agricola" GmbH, Klinik für Gefäßchirurgie<br>Zink, Karl; Diabetes Klinik<br>Neugebauer, Edmund; Universität Witten/Herdecke Department für Humanmedizin; Medizinische Hochschule Brandenburg -Theodor Fontane |
| <b>Primary Subject Heading</b>: | Diabetes and endocrinology                                                                                                                                                                                                                                                                                                                                                                                                                                                                                                                                                                                                                                                                                                                                                                                                                                                                                                                                                                                                                                                          |
| Secondary Subject Heading:      | Surgery, Evidence based practice, Dermatology                                                                                                                                                                                                                                                                                                                                                                                                                                                                                                                                                                                                                                                                                                                                                                                                                                                                                                                                                                                                                                       |
| Keywords:                       | negative pressure wound therapy, wound healing, benefit assessment, wound treatment, Diabetic foot < DIABETES & ENDOCRINOLOGY, wound care                                                                                                                                                                                                                                                                                                                                                                                                                                                                                                                                                                                                                                                                                                                                                                                                                                                                                                                                           |
|                                 |                                                                                                                                                                                                                                                                                                                                                                                                                                                                                                                                                                                                                                                                                                                                                                                                                                                                                                                                                                                                                                                                                     |

SCHOLARONE™  
Manuscripts



I, the Submitting Author has the right to grant and does grant on behalf of all authors of the Work (as defined in the below author licence), an exclusive licence and/or a non-exclusive licence for contributions from authors who are: i) UK Crown employees; ii) where BMJ has agreed a CC-BY licence shall apply, and/or iii) in accordance with the terms applicable for US Federal Government officers or employees acting as part of their official duties; on a worldwide, perpetual, irrevocable, royalty-free basis to BMJ Publishing Group Ltd ("BMJ") its licensees and where the relevant Journal is co-owned by BMJ to the co-owners of the Journal, to publish the Work in this journal and any other BMJ products and to exploit all rights, as set out in our [licence](#).

The Submitting Author accepts and understands that any supply made under these terms is made by BMJ to the Submitting Author unless you are acting as an employee on behalf of your employer or a postgraduate student of an affiliated institution which is paying any applicable article publishing charge ("APC") for Open Access articles. Where the Submitting Author wishes to make the Work available on an Open Access basis (and intends to pay the relevant APC), the terms of reuse of such Open Access shall be governed by a Creative Commons licence – details of these licences and which [Creative Commons](#) licence will apply to this Work are set out in our licence referred to above.

Other than as permitted in any relevant BMJ Author's Self Archiving Policies, I confirm this Work has not been accepted for publication elsewhere, is not being considered for publication elsewhere and does not duplicate material already published. I confirm all authors consent to publication of this Work and authorise the granting of this licence.

1  
2  
3 1 **Negative Pressure Wound Therapy compared with standard moist wound care on**  
4 **diabetic foot ulcers in real-life clinical practice – Results of the German DiaFu-RCT**

5 2  
6 3  
7  
8 4 Dörthe Seidel, Martin Storck, Holger Lawall, Gernold Wozniak, Peter Mauckner, Dirk Hochlenert, Walter Wetzel-Roth,  
9 5 Klemens Sondern, Matthias Hahn, Gerhard Rothenaicher, Thomas Krönert, Karl Zink, Edmund Neugebauer

10 6  
11 7 Institut für Forschung in der Operativen Medizin (IFOM), University of Witten/Herdecke, Köln, Germany (D Seidel MD),  
12 8 Doerthe.Seidel@uni-wh.de

13 9 Klinik für Gefäß- und Thoraxchirurgie, Städtisches Klinikum Karlsruhe, Karlsruhe, Germany (Prof M Storck MD),  
14 10 Martin.Storck@klinikum-karlsruhe.de

15 11 Praxis für Herz-Kreislaufkrankungen, Ettlingen und Max-Grundig Klinik Bühlerhöhe, Germany (Dr med H Lawall MD),  
16 12 holger.lawall@gmail.com

17 13 Gefäßchirurgische Klinik, Knappschaftskrankenhaus, Bottrop, Germany (Prof G Wozniak MD), gernold.wozniak@kk-  
18 14 bottrop.de

19 15 Innere Medizin, St. Remigius Krankenhaus Opladen, Leverkusen, Germany (Dr med P Mauckner MD), peter-  
20 16 mauckner@live.de

21 17 Gemeinschaftspraxis Schlotmann-Hochlenert-Zavaleta-Haberstock, Köln, Germany (Dr med D Hochlenert MD),  
22 18 dirk.hochlenert@web.de

23 19 Chirurgische Praxis Wetzel-Roth, Buchloe, Germany (Dr med W Wetzel-Roth MD), info@wetzels-oth.de

24 20 Klinik für Innere Medizin/Diabetologie, Marien Hospital Dortmund-Hombruch, Dortmund, Germany (Dr med Sondern MD),  
25 21 klemens.sondern@marien-hospital-dortmund.de

26 22 Allgemein- und Viszeralchirurgie, Helfenstein Klinik, Geisslingen, Germany (Dr med M Hahn, MD), matthias.hahn@af-k.de

27 23 Chirurgische Praxis Rothenaicher, München, Germany (G Rothenaicher MD), rothenaicher@arcor.de

28 24 Klinik für Gefäßchirurgie, Thüringen-Kliniken "Georgius Agricola" GmbH, Saalfeld, Germany (Dr med T Krönert MD),  
29 25 tkroenert@thueringen-kliniken.de

30 26 Diabetes Klinik, Bad Mergentheim, Germany (Dr med K Zink MD), zink@diabetes-zentrum.de

31 27 University of Witten/Herdecke, Köln, Germany (Prof E Neugebauer), Edmund.Neugebauer@uni-wh.de

32 28

33 29 **Correspondence to:**

34 30 Dörthe Seidel\*

35 31 Institut für Forschung in der Operativen Medizin (IFOM)

36 32 University of Witten/Herdecke

37 33 Ostmerheimerstraße 200 Haus 38

38 34 Köln (Cologne)

39 35 51109 Germany

40 36 **Doerthe.Seidel@uni-wh.de**

**Abstract****Objectives**

The aim of the DiaFu-study was to evaluate effectiveness and safety of Negative Pressure Wound Therapy (NPWT) in patients with diabetic foot wounds in clinical practice.

**Design**

In this controlled clinical superiority trial with blinded outcome assessment patients were randomized in a 1:1 ratio stratified by study site and ulcer severity grade using a web-based-tool.

**Setting**

This German-national study was conducted in 40 surgical and internal medicine in- and outpatient facilities specialized in diabetes foot care.

**Participants**

368 patients were randomized and 345 participants were included in the modified ITT population. Adult patients suffering from a diabetic foot ulcer at least for 4 weeks and without contraindication for NPWT were allowed to be included.

**Interventions**

NPWT was compared with Standard Moist Wound Care (SMWC) according to local standards and guidelines.

**Primary and secondary outcome measures**

Primary outcome was wound closure within 16 weeks. Secondary outcomes were wound- and treatment-related adverse events (AEs), amputations, time until optimal wound bed preparation, wound size and wound tissue composition, pain, and quality of life within 16 weeks, and recurrences and wound closure within 6 months.

**Results**

In the ITT population, neither the wound closure rate (Difference: N=4 (2.5% [95%CI -4.7 - 9.7]; p=0.53) nor the time to wound closure (p=0.244) was significantly different between the treatment arms. 191 participants (NPWT 127; SMWC 64) had missing endpoint documentations, premature therapy ends or unauthorized treatment changes. 96 patients in the NPWT-arm and 72 patients in the SMWC-arm had at least one AE (p=0.007), but only 11 AEs were possibly related to NPWT.

**Conclusions**

NPWT was not superior to SMWC in diabetic foot wounds in German clinical practice. Overall wound closure rate was low. Documentation deficits and deviations from treatment guidelines negatively impacted the outcome wound closure.

**Trial registration**

Clinical Trials.gov: NCT01480362

## 71 **Strengths and limitations of this study**

- 72 • The DiaFu study included patients with diabetic foot ulcers both with peripheral neuropathy and  
73 peripheral arterial occlusive disease, which corresponds to the typical mixed patient population in real-  
74 life clinical practice. This allows a general statement on effectiveness and safety of NPWT in the typical  
75 medical care situation, but including patients with peripheral artery occlusive disease and clinical signs  
76 of inflammation (suspected infection) had a potentially negative effect on the treatment outcome wound  
77 closure.
- 78 • The study does not provide any information on the effectiveness of NPWT in specific patient groups.
- 79 • In this health services research study, hospitals and outpatient facilities were selected by means of a  
80 qualification checklist and clinical investigators were obliged to provide patients with the best clinical  
81 practice in compliance with all relevant diagnostic and treatment guidelines, but there was no active  
82 monitoring of the implementation of these guidelines.
- 83 • To ensure the best quality of local wound treatment and to achieve optimal baseline conditions, the study  
84 sites were trained for both NPWT and SMWC, but treatment application was at the discretion of the  
85 clinical investigators.
- 86 • A high number of missing endpoint documentations, premature termination of NPWT and unauthorized  
87 therapy changes negatively impacted the treatment outcome wound closure and may have led to bias in  
88 the results.

## 90 **Background**

91 More than 400 million people worldwide suffer from diabetes [1, 2] and about 15% of all these patients will  
92 develop a diabetic foot ulcer (DFU) during their lifetime [3, 4]. Approximately 50-70% of all lower limb  
93 amputations are due to diabetes [4]. DFUs represent complex chronic wounds with a major impact on patients'  
94 morbidity, mortality and quality of life. Beside an optimal diabetes and infection control, pressure relieving  
95 strategies and restoring pulsatile blood flow, effective local wound care is part of the holistic approach necessary  
96 to optimally treat patients with DFUs. Only a few modern moist wound dressings and topical agents have been  
97 convincingly shown to achieve higher wound closure rates compared with traditional wet gauze dressings in  
98 patients with diabetic foot wounds [5]. Also, for other ulcer types there is an uncertainty which dressings and  
99 topical agents are most effective for treatment [6]. Negative pressure wound therapy (NPWT) is an innovative  
100 treatment option and one of the most commonly used and well-established technologies with the aim to promote



1  
2  
3 101 wound healing [7]. The first use of vacuum sealing was described in 1993 by Fleischmann et al. [8] and the  
4  
5 102 commercially available product was developed later in the 1990s [9, 10]. Positive effects of NPWT on wound  
6  
7 103 healing have been suggested in various basic studies [10, 11]. At the time of planning the DiaFu-study, the clinical  
8  
9 104 evidence largely consisted of clinician perception, case reports and series, small cohort studies, and weakly-  
10  
11 105 powered or low-quality randomized trials that documented broad use of NPWT in various clinical settings and  
12  
13 106 constituted a substantial number of publications but an overall small amount of evidence [12-15]. Two randomized  
14  
15 107 controlled trials (RCTs) performed by Armstrong 2005 [16] and Blume 2008 [17] provided a solid basis for  
16  
17 108 planning a study.

18 109 In the recent years, a specific review for the use of NPWT in diabetic foot wounds performed by Dumville et al in  
19  
20 110 2013 [18], an assessment in the home setting by Rhee et al. in 2014 [19] and a health technology assessment  
21  
22 111 particularly issued for the evaluation of NPWT for managing diabetic foot ulcers [20] in 2014, as well as the most  
23  
24 112 recent work of Liu et al in 2017 [21, 22] all concluded that although NPWT may have a positive effect, the trials  
25  
26 113 that have been performed have methodological flaws and sufficient, unbiased evidence of whether wounds heal  
27  
28 114 better or worse with NPWT than with conventional treatment is still missing.

29  
30 115 In Germany, the issue of evidence for efficacy and safety of NPWT in acute and chronic wounds was first  
31  
32 116 addressed in 2002 when the German Federal Joint Committee (German: Gemeinsamer Bundesausschuss [G-BA])  
33  
34 117 needed to decide whether NPWT could be reimbursed without restrictions in outpatient care.

35 118 Finally, in 2007 taking into account all available evidence the G-BA decided that the benefits of the treatment  
36  
37 119 method NPWT should be evaluated in a so-called model project. This included the conduct of clinical studies for  
38  
39 120 which the G-BA defined basic requirements. This essentially concerned the formulation of a study hypothesis that  
40  
41 121 supports G-BA's overall question if NPWT can be reimbursed in German outpatient care without any limitation;  
42  
43 122 the selection of a comparator that represents the current treatment standard in Germany; and implementation of all  
44  
45 123 measures to ensure a sufficient certainty of the results.

46  
47 124 Following the announcement of the G-BA, the German statutory health insurance funds initiated an overall project  
48  
49 125 through a European tender. The DFU has been chosen to be the representative for chronic wounds in a RCT  
50  
51 126 comparing NPWT and standard moist wound care (SMWC) in clinical practice.

52  
53 127

## 54 128 **Methods**

### 55 129 **Aim of the study**

56  
57 130 The aim of the DiaFu-study was to evaluate whether the effectiveness and safety of NPWT is superior to SMWC  
58  
59 131 in German real-life clinical practice.  
60

1  
2  
3 132  
4  
5 133  
6  
7 134  
8  
9 135  
10  
11 136  
12  
13 137  
14  
15 138  
16  
17 139  
18  
19 140  
20  
21 141  
22  
23 142  
24  
25 143  
26  
27 144  
28  
29 145  
30  
31 146  
32  
33 147  
34  
35 148  
36  
37 149  
38  
39 150  
40  
41 151  
42  
43 152  
44  
45 153  
46  
47 154  
48  
49 155  
50  
51 156  
52  
53 157  
54  
55 158  
56  
57 159  
58  
59 160  
60  
161  
162

### **Study Design**

The DiaFu-study was a multicenter, randomized controlled clinical superiority trial with blinded assessment of wound closure, wound size and wound tissue qualities using photographs. This German national study was conducted both in hospital departments and outpatient facilities with a special qualification for diabetic foot care. Study sites were selected based on their qualifications and experiences using a pre-study qualification checklist and annual quality reports of the respective institution (if available). Study treatment was allowed to be started both in in- and outpatient care and should be continued outpatient whenever possible. Ethical approval of the Lead Ethical Committee of the University of Witten/Herdecke has been fully granted without any conditions. More detailed information on the study design can be found in the study protocol publication that is available open access [23].

### **Patient and Public Involvement**

Patients were not involved in the design, recruitment or conduct of the study. The results of this study will not be disseminated directly to study participants.

### **Participants**

Following a pragmatic approach with the aim to include a patient population best representing real-life clinical practice, in- and exclusion criteria were selected based on manufacturers' contraindications and FDA warnings, the necessity to exclude patients in need of protection and who are unable to give their consent, and the intention to avoid general study-related and treatment specific influences on the results.

Adult patients (age >18 years) with at least 4-week-old chronic diabetic foot ulcers corresponding to Wagner 2 to 4 were screened for study participation by the local investigators. Before inclusion, the study protocol required either a debridement or, if necessary, an amputation of foot parts, or a thorough wound cleansing, depending on the individual needs of the patients. Thus, chronic diabetic foot wounds after adequate wound pretreatment as well as post-surgical amputation wounds below the upper ankle joint were eligible for inclusion. The initially planned minimum ulcer age of 6 weeks was reduced to 4 weeks during the course of the study. As in clinical practice, the assessment of patients' suitability for a specific wound therapy with the aim of complete wound closure and due to randomization for both study treatment arms (NPWT and SMWC) was at the discretion of the treating physicians (clinical investigators of the study). Particular attention was to be paid to the diagnosis and therapy of concomitant diseases.

1  
2  
3 163 Patients estimated to be at risk of non-compliance with study requirements, with wounds with necrotic tissue  
4  
5 164 present that could not be removed by debridement or amputation, with exposed blood vessels within or directly  
6  
7 165 surrounding the wound not possible to be sufficiently covered or with an increased risk of bleeding with  
8  
9 166 hemodynamic consequences (mainly relevant for posterior tibial artery dorsalis pedis artery), and outpatients  
10  
11 167 receiving anticoagulation therapy or suffering from a high-grade impaired clotting function with a heightened risk  
12  
13 168 of bleeding with hemodynamic consequences were excluded from the DiaFu-study. The use of NPWT devices on  
14  
15 169 the study wound within six weeks prior to study start represented an exclusion criterion in order to demonstrate a  
16  
17 170 clear therapeutic effect of each treatment arm.

18 171 Written informed consent was obtained from every participant after being informed about all aspects of the trial  
19  
20 172 and before randomization and any trial-related procedure. As the statutory health insurance funds provided  
21  
22 173 integrated care contracts for outpatient NPWT, it was only possible to include patients in the study who were  
23  
24 174 members of a participating health insurance fund.

25  
26 175

### 27 28 176 **Randomization and masking**

29  
30 177 Patients were randomly allocated to the treatment arms in a 1:1 ratio using a computer-generated list located on a  
31  
32 178 centralized web-based tool. The randomization list consisted of permuted blocks of variable length (4, 6) which  
33  
34 179 were randomly arranged. Patients were stratified by study site and by Wagner-Armstrong stage within each site  
35  
36 180 (<Wagner-Armstrong stage 2C and  $\geq$  Wagner-Armstrong stage 2C). The randomization lists were generated with  
37  
38 181 the help of a self-created Java program and integrated into the study database. Each registered investigator received  
39  
40 182 individual access to the randomization tool via the study website, but without knowledge of future treatment  
41  
42 183 assignment, which provided adequate allocation concealment. The investigators were responsible for adequately  
43  
44 184 implementing the assigned therapy. Due to the physical differences between the treatment regimens it was not  
45  
46 185 possible to blind either participant or physician to the treatment assignment. Verification of complete wound  
47  
48 186 closure was performed by independent, blinded assessment of wound photographs. Determination of wound size  
49  
50 187 and percentage wound tissue quality was also performed by central, blinded outcome assessors based on the wound  
51  
52 188 photographs using the Wound Healing Analyzing Tool (W.H.A.T.). The determination of sufficient wound bed  
53  
54 189 conditioning and the indication for surgical closure was carried out by the treating physician, as in clinical practice.  
55  
56 190 The treating physician was not blinded to treatment allocation.

57 191

### 58 192 **Procedures**

1  
2  
3 193 Basic data were collected for all patients considered for study participation during screening and have been updated  
4  
5 194 during the randomization visit. Patients received an extensive examination of overall health status, specific  
6  
7 195 diabetes associated disorders, and relevant influence factors on wound healing during screening with an update at  
8  
9 196 the randomization visit. Neuropathy and vascular diagnostics were performed according to the German National  
10  
11 197 Health Care Guidelines for Type 2 Diabetes Foot Complications [24]. After anamnesis and general diagnostics  
12  
13 198 (physical examination) this care guideline recommends the following further vascular diagnostics: ankle-arm index  
14  
15 199 (ABI, "Ankle-Brachial-Index") and additional assessment of the Doppler frequency spectrum (due to the possible  
16  
17 200 falsifying of the results by Media sclerosis) and, if necessary, additional hydrostatic toe pressure measurement  
18  
19 201 (pole test) or a transcutaneous oxygen partial pressure measurement (tcPO<sub>2</sub>); duplex sonography to determine the  
20  
21 202 extent and distribution pattern of PADK (including the lower leg arteries if necessary). In case of inconclusive  
22  
23 203 findings contrast-agent-enhanced MR angiography (MRA) and intra-arterial digital subtraction angiography  
24  
25 204 (DSA) were considered. No detailed examination results of the vascular diagnostics but the final diagnosis of  
26  
27 205 peripheral artery occlusive disease (PAOD) and critical limb ischemia (CLI) were to be documented in the eCRF  
28  
29 206 by the clinical investigators. Infection diagnosis comprised clinical evaluation and laboratory testing. In case of  
30  
31 207 suspected diabetic foot osteomyelitis (DFO) a probe to bone test and a stepwise approach to imaging modalities  
32  
33 208 were applied in order to confirm the clinical diagnosis and to determine the best treatment regimen for the study  
34  
35 209 participants.

36  
37 210 Before randomization and start of study treatment all patients underwent one or more of the following no longer  
38  
39 211 than six hours before randomization: amputation, debridement or thorough wound cleansing. Study therapy was  
40  
41 212 allowed to be started either in-hospital or as outpatient and was intended to be continued in outpatient care  
42  
43 213 whenever possible.

44  
45 214 In the intervention arm commercially available CE-marked NPWT devices of the manufacturers Kinetic Concepts  
46  
47 215 Incorporated (KCI) and Smith & Nephew were used in the discretion of the clinical investigator according to  
48  
49 216 clinical routine and manufacturer's instructions [23]. Intermittent and continuous NPWT was allowed to be used  
50  
51 217 with the negative pressure to be adapted as recommended for the dressing applied (V.A.C.-Granufoam®black or  
52  
53 218 Silver®; V.A.C.-White Foam®; Renassys™ -F/P; Renassys™ -G) and adapted to the wound needs.  
54  
55 219 Recommendations for use can be found on the manufacturers' websites. As part of the European tender for the  
56  
57 220 overall project, the German statutory health insurance funds awarded lots for the provision of the medical products  
58  
59 221 by the respective manufacturers. Germany was divided into 4 supply areas. During the award procedure, Smith &  
60  
222 Nephew received 1 lot and KCI 3 lots. Thus, devices and consumables of Smith & Nephew were used for the north

223 and northern east region of Germany and for the rest of Germany the therapy systems of KCI were used. Within  
224 the study, NPWT was required to be used for wound bed preparation in order to achieve at least 95% granulation  
225 of the wound area. After optimal preparation of the wound, complete closure could be achieved either by secondary  
226 intention with dressings or by surgical closure with subsequent removal of the suture.

227 Control therapy was defined as any SMWC according to local clinical standards and guidelines [25, 26].  
228 Healthcare providers were obligated to provide patients with best practice. In the control arm it was permitted to  
229 apply any local wound treatment standard used in the respective study site that did not have an experimental status  
230 or was NPWT. To ensure the best quality of local wound treatment, the study sites were trained for both the  
231 intervention arm by the manufacturers and the control arm by the German Society for Wound Healing and Wound  
232 Treatment which provided parts of its curriculum and experienced instructors.

233 The maximum study treatment time was 16 weeks after randomization. Study visits needed to be performed at  
234 week one, three, five, 12 and 16, and in the event of end of treatment, hospital discharge, wound closure and for  
235 wound closure confirmation after a minimum of 14 days. Study participants were followed up until 6 months after  
236 randomization. The initially planned follow-up period of 12 months was reduced to 6 months in the course of the  
237 study. The amendment to the study protocol was endorsed by the Ethics Committee and immediately  
238 communicated to all participating study sites.

### 240 **Outcomes**

241 The primary outcome was wound closure (100% epithelialization of the wound, no drainage, no suture material  
242 and no need for wound dressing or adjuvants) within the maximum study treatment period of 16 weeks. Wound  
243 closure could be achieved both by healing by secondary intention and by delayed primary closure and needed to  
244 sustain for a minimum of 14 days. Complete closure of the wound needed to be confirmed by independent blinded  
245 observers using wound photographs.

246 Secondary outcomes were wound closure after six months; time until optimal preparation of the wound bed (a  
247 minimum of 95% granulation), amputations and resections, wound size and wound tissue composition, pain and  
248 quality of life within 16 weeks, and recurrence within six months. The initial planned secondary endpoint time  
249 until wound closure within 6 months was abandoned during the course of the study. It was found that a time-to-  
250 event survey was not possible outside the active study treatment period. This was mostly due to the fact that after  
251 this 16-week period weekly study visits were no longer an obligation and further patient care was no longer bound  
252 to the study site.

1  
2  
3 253 Minor and major amputations were considered separately, whereas the disarticulation at the midtarsal joint  
4  
5 254 (Chopart's amputation) was considered still to be minor. Wound size and wound tissue composition (percentage  
6  
7 255 of granulation tissue, fibrin and necrosis) were monitored at each study visit. Quality of life (QoL) was measured  
8  
9 256 using the questionnaire Euro Quol 5D (EQ5D) at inclusion, end of the maximum treatment time or end of the  
10  
11 257 therapy and at the six-month follow-up visit. At each study visit participants were asked to provide their assessment  
12  
13 258 of wound-associated pain on a numerical rating scale (0 to 10). The incidence of serious adverse events (SAEs)  
14  
15 259 within six months and the incidence of device-related and wound-related adverse events occurring within 16 weeks  
16  
17 260 or until wound closure confirmation were safety endpoints of this trial.

18 261

### 20 262 **Statistical analysis**

22 263 Sample size calculation was performed using the expected difference between wound closure rates in both  
23  
24 264 treatment arms based on information extracted from previously published studies by Armstrong and Lavery [16]  
25  
26 265 and Blume [17]. We assumed a complete wound closure rate of 45% for NPWT and 30% in the SMWC group,  
27  
28 266 resulting in a minimum difference of 15% after a treatment time of 16 weeks. Based on a type one error of  $\alpha = 0.05$   
29  
30 267 and a type two error of  $\beta = 0.2$  (corresponding to a power of 80%) a total sample size of 162 patients per group  
31  
32 268 was calculated. The computer program of Dupont and Plummer was used for sample size calculation [27].

33  
34 269 We performed all analyses based on a modified intention-to-treat (ITT) population that includes all randomized  
35  
36 270 participants who have a valid baseline and at least one valid post baseline wound assessment. As a secondary  
37  
38 271 approach a per-protocol (PP) analysis has been performed excluding patients with any serious protocol deviations,  
39  
40 272 like temporary changes from SMWC to NPWT, permanent wound treatment changes or without valid  
41  
42 273 documentation until wound closure confirmation or end of maximum treatment time (EOMT). Safety data are  
43  
44 274 presented on an 'as treated' basis. Subgroup analysis is presented for small vs big wound subpopulations. There  
45  
46 275 was no interim analysis.

47 276 The superiority hypothesis was tested in parallel for wound closure rate and time to wound closure within 16 weeks.  
48  
49 277 Incidence of complete wound closure was analyzed using a chi-squared test (Fisher's exact test) comparing the  
50  
51 278 two treatment arms. Time to complete wound closure was compared between the two treatment arms using a Log-  
52  
53 279 rank test. The method of Bonferroni-Holm was used for adjustment of the  $\alpha$ -error for parallel confirmatory testing  
54  
55 280 of both primary endpoints. Missing values have been incorporated as censored values.

56  
57 281 During study planning, the following concomitant diseases and therapeutic measures with a possible influence on  
58  
59 282 the primary study outcome wound closure (confounders) were identified: presence of neuropathy (sensation loss  
60  
283 according to the PEDIS classification system [28]); presence of diabetic neuropathic osteoarthropathy (DNOAP)



1  
2  
3 284 (anatomical classification according to Sanders [29] and progression stages according to Levin [30]), Wagner [31]  
4  
5 285 grading of the ulcer; presence of peripheral arterial occlusive disease (Rutherford classification for chronic limb  
6  
7 286 ischemia [32]), chronic venous insufficiency (CVI) (Widmer I-III [33]), presence of extreme foot deformities and  
8  
9 287 malpositions of toes, foot or the entire limb; untreated or therapy-refractory inflammation in the wound area;  
10  
11 288 chronic anemia; heel necrosis; presence of a lymphedema; infection; heightened glycated hemoglobin (HbA1c)  
12  
13 289 level; dialysis; application of hyperbaric oxygen (HBO) or normothermal therapy, application of recombinant or  
14  
15 290 autologous growth factors to the study wound, and application of skin or dermal substitutes and with living cells  
16  
17 291 that produce growth factors. These covariates thought to influence wound closure were analyzed for their effect  
18  
19 292 on the two primary endpoints. Covariates were excluded from the analysis if the number of missing values was  
20  
21 293 too high. First, the relevant covariates were tested by means of a univariate analysis with regard to their effect on  
22  
23 294 wound closure rate and time without consideration of the treatment arms. If there was a significant influence, the  
24  
25 295 frequency of occurrence in the treatment arms was analyzed. Secondary, multivariate analyses were performed for  
26  
27 296 both primary endpoints, taking into account treatment assignment and including all relevant covariates. The  
28  
29 297 multivariate analysis of the primary endpoint wound closure rate was performed with binary logistic regression to  
30  
31 298 describe the influence of the independent covariates (regressors) on the dependent dichotomous variable wound  
32  
33 299 closure. The multivariate analysis of the primary endpoint time to wound closure was performed using a COX  
34  
35 300 regression model.  
36  
37 301 Safety and secondary endpoints were analyzed using conventional univariate testing.  
38  
39 302 Within a priori planned subgroup analysis the ITT population was divided into a group of small wounds and a  
40  
41 303 group of big wounds based on the wound surface area documented during the randomization visit. Wounds smaller  
42  
43 304 than or equal to the total median wound surface (483 mm<sup>2</sup>) were assigned to the subgroup "small wounds". Patients  
44  
45 305 with wound surface areas larger than the median value were assigned to the subgroup "large wounds". Since no  
46  
47 306 citable scientific definition of a large wound was available at the time of study planning and the clinical experts  
48  
49 307 involved could not make a decision, the median of all wounds was chosen as the criterion for the division into the  
50  
51 308 two subgroups. Confirmatory analysis of primary and secondary endpoints was repeated for the subgroups.  
52  
53 309 Missing values for the following outcome parameters were replaced using the Last Observation Carried Forward  
54  
55 310 (LOCF) method: wound closure rate, wound size and wound tissue quality, recurrence and amputation. The  
56  
57 311 outcome parameters time to wound closure and time until optimal preparation of the wound bed did not require  
58  
59 312 data replacement, since missing values are included in the analysis as right-censored values. If the wound closure  
60  
313 was not confirmed to be closed after a minimum of 14 days, the wound was considered as an unsustained wound  
314  
closure. All missing quality of life values (EQ-5D) were replaced with the overall quality of life assessment (visual

1  
2  
3 315 analogue scale), if available. If there was no quality of life assessment, there was no replacement. For missing  
4  
5 316 values of the demographic and baseline characteristics, which are necessary for the estimation of the regression  
6  
7 317 coefficients, no replacement was performed. IBM SPSS Statistics (version 23) was used for all analyses.

8  
9 318 This study is registered with ClinicalTrials.gov. Number NCT01480362 and in the German Clinical Trial Registry,  
10  
11 319 number DRKS00003347.

12  
13 320 A data monitoring committee was formed to oversee overall study performance and safety.

14  
15 321

### 16 322 **Role of the funding source**

17  
18 323 Through a European tender the study was initiated by a consortium of 19 statutory German health insurance funds,  
19  
20 324 which provided integrated care contracts for all study participants and for up to 7000 patients with acute and  
21  
22 325 chronic wounds in Germany; defined basic rules for study design based on the requirements of the German  
23  
24 326 authorities; and provided a critical review of the study protocol and the final report. The study was funded by the  
25  
26 327 manufacturers Kinetic Concepts Incorporated (KCI) and Smith & Nephew (S&N). Both companies provided the  
27  
28 328 NPWT devices and associated consumable supplies in the assigned regions of Germany as well as all necessary  
29  
30 329 support and information about the used material. The manufacturers had no role in study design, data collection,  
31  
32 330 data analysis, data interpretation, or writing of the report. All authors had full access to all of the data (including  
33  
34 331 statistical reports and tables) in the study and take full responsibility for the accuracy of the data analysis.

35  
36 332

### 37 333 **Results**

38  
39 334 Between Dec 23, 2011 and August 12, 2014 386 patients were enrolled and randomly assigned to receive NPWT  
40  
41 335 (181) or SMWC (187) in the DiaFu-study (**Error! Reference source not found.**) in overall 40 study sites, which  
42  
43 336 recruited minimum 1 patient and maximum 76 patients. 13 clinical investigators randomized more than 10 patients.  
44  
45 337 23 study sites enrolled only between 1 and 4 patients. Most of these study sites refused further study participation  
46  
47 338 due lack of time and staff for adequately performing the documentation. In the further course of the trial research  
48  
49 339 nurses have been hired by the independent scientific institute overseeing the trial in order to support the  
50  
51 340 documentation in the study sites whenever needed.

52  
53 341

54  
55 342 Demographics and relevant baseline characteristics of the DFU are presented in Table 1 and Supplement Table 1.

56  
57 343 Baseline characteristics of the patients in the NPWT-and the SMWC-arm are similar in the ITT population without  
58  
59 344 any relevant difference between the treatment arms.

60  
345



| <b>Demographics of the study population and baseline parameters of the DFU of the ITT population</b> | <b>Total<br/>N=345 (100 %)</b> | <b>NPWT<br/>N=171 (49.6%)</b> | <b>SMWC<br/>N=174 (50.4%)</b> |
|------------------------------------------------------------------------------------------------------|--------------------------------|-------------------------------|-------------------------------|
| <b>Male</b>                                                                                          | 267 of 345 (77.4%)             | 133 of 171 (77.8%)            | 134 of 174 (77.0%)            |
| <b>Female</b>                                                                                        | 78 of 345 (22.6%)              | 38 of 171(22.2%)              | 40 of 174 (23.0%)             |
| <b>Age (years) (N=345) Mean (SD)</b>                                                                 | 67.8 (11.9)                    | 67.6 of 171(12.3)             | 68.1 (11.5)                   |
| <b>Height (N=340) (in cm) Mean (SD)</b>                                                              | 174.1 (12.4)                   | 173.4 (14.6)                  | 174.8 (9.9)                   |
| <b>Weight (N=335) (in kg) Mean (SD)</b>                                                              | 93.3 (22)                      | 92.7 (21.5)                   | 93.8 (22.6)                   |
| <b>Localization of the ulcer</b>                                                                     |                                |                               |                               |
| <b>Regio calcanea</b>                                                                                | 39 (11.3%)                     | 17 (9.9%)                     | 22 (12.6%)                    |
| <b>Dorsum pedis</b>                                                                                  | 20 (5.8%)                      | 13 (7.6%)                     | 7 (4%)                        |
| <b>Planta pedis</b>                                                                                  | 56 (16.2%)                     | 30 (17.5%)                    | 26 (14.9%)                    |
| <b>Metatarsalia</b>                                                                                  | 147 (42.6%)                    | 73 (42.7%)                    | 74 (42.5%)                    |
| <b>Phalanges distales</b>                                                                            | 64 (18.6%)                     | 31 (18.1%)                    | 33 (19%)                      |
| <b>Phalanges mediales</b>                                                                            | 28 (8.1%)                      | 14 (8.2%)                     | 14 (8%)                       |
| <b>Phalanges proximales</b>                                                                          | 40 (11.6%)                     | 21 (12.3%)                    | 19 (10.9%)                    |
| <b>Hallux</b>                                                                                        | 42 (12.2%)                     | 24 (14%)                      | 18 (10.3%)                    |
| <b>Digitus pedis II</b>                                                                              | 22 (6.4%)                      | 10 (5.8%)                     | 12 (6.9%)                     |
| <b>Digitus pedis III</b>                                                                             | 14 (4.1%)                      | 7 (4.1%)                      | 7 (4%)                        |
| <b>Digitus pedis IV</b>                                                                              | 20 (5.8%)                      | 7 (4.1%)                      | 13 (7.5%)                     |
| <b>Digitus minimus</b>                                                                               | 25 (7.2%)                      | 12 (7%)                       | 13 (7.5%)                     |
| <b>Type of ulcer</b>                                                                                 |                                |                               |                               |
| <b>Primary ulcer</b>                                                                                 | 279 of 342 (80.9%)             | 136 of 170 (79.5%)            | 143 of 172 (82.2%)            |
| <b>Recurrence</b>                                                                                    | 63 of 342 (18.3%)              | 34 of 170 (19.9%)             | 29 of 172 (16.7%)             |
| <b>Duration of ulcer (days)</b>                                                                      |                                |                               |                               |
| <b>N</b>                                                                                             | 335                            | 168                           | 167                           |
| <b>Mean (SD)</b>                                                                                     | 189.7 (360.2)                  | 217.1 (458.1)                 | 162.1 (220)                   |
| <b>Median</b>                                                                                        | 83 (136)                       | 81 (140)                      | 85 (132)                      |
| <b>Min – Max</b>                                                                                     | 0 – 4468                       | 0 – 4468                      | 0 – 1826                      |
| <b>Wound surface area at randomization (mm<sup>2</sup>)</b>                                          |                                |                               |                               |
| <b>Mean (SD)</b>                                                                                     | 1101 (2543)                    | 1060 (1536)                   | 1141 (3247)                   |
| <b>Median (IQR)</b>                                                                                  | 491 (1079)                     | 550 (1217)                    | 471 (1007)                    |
| <b>Min-Max</b>                                                                                       | 12 – 40773                     | 20 – 13188                    | 12 – 40773                    |
| <b>Wound surface area at randomization for small wounds (mm<sup>2</sup>)</b>                         |                                |                               |                               |

|                                                                              |             |             |             |
|------------------------------------------------------------------------------|-------------|-------------|-------------|
| <b>N</b>                                                                     | 173         | 83          | 90          |
| <b>Mean (SD)</b>                                                             | 213 (136)   | 212 (138)   | 213 (135)   |
| <b>Median (IQR)</b>                                                          | 188 (220)   | 176 (220)   | 196 (222)   |
| <b>Min-Max</b>                                                               | 12-484      | 20-484      | 12-471      |
| <b>Wound surface area at randomization for large wounds (mm<sup>2</sup>)</b> |             |             |             |
| <b>N</b>                                                                     | 172         | 88          | 84          |
| <b>Mean (SD)</b>                                                             | 1995 (3377) | 1860 (1805) | 2135 (4474) |
| <b>Median (IQR)</b>                                                          | 1276 (1482) | 1364 (1242) | 1242 (1708) |
| <b>Min-Max</b>                                                               | 491-40773   | 520-13188   | 491-40773   |

Table 1: The table shows patient demographics and baseline characteristics of the ITT population. Data are Number (N) and Percentage (%), Mean and Standard Deviation (SD), Median and Interquartile Range (IQR), and Minimum – Maximum [Min – Max]. “N=” is stating the number of patients with actual available information. Based on the median wound surface area of all included patients, the wounds were divided into an a priori planned subgroup of large (Median wound surface area  $\leq$ 484 mm<sup>2</sup>) and a subgroup of small wounds (Median wound surface area  $>$ 484 mm<sup>2</sup>).

The baseline of the identified factors possibly influencing wound closure is shown in Table 2.

| <b>Confounders at baseline in the ITT population</b>                                                                                                                                                                                                     | <b>Total<br/>N=345</b>  | <b>NPWT<br/>N=171.</b>  | <b>SMWC<br/>N=174.</b>  |
|----------------------------------------------------------------------------------------------------------------------------------------------------------------------------------------------------------------------------------------------------------|-------------------------|-------------------------|-------------------------|
| <b>Presence of neuropathy (sensation loss according to the PEDIS classification system)</b>                                                                                                                                                              | 250 of 334 (72.5%)      | 125 of 166 (73.1%)      | 125 of 168 (71.8%)      |
| <b>Presence of a diabetic neuropathic osteoarthropathy (DNOAP)</b>                                                                                                                                                                                       | 61 (17.7%)              | 30 (17.5%)              | 31 (17.8%)              |
| <b>Wagner grading of the ulcer</b>                                                                                                                                                                                                                       |                         |                         |                         |
| <b>1 - Superficial ulcer of skin or subcutaneous tissue</b>                                                                                                                                                                                              | 6 (1.7%)<br>225 (65.2%) | 2 (1.2%)<br>110 (64.3%) | 4 (2.3%)<br>115 (66.1%) |
| <b>2 - Ulcers extend into tendon, bone, or capsule</b>                                                                                                                                                                                                   | 85 (24.6%)              | 45 (26.3%)              | 40 (23%)                |
| <b>3 - Deep ulcer with osteomyelitis, or abscess</b>                                                                                                                                                                                                     | 26 (7.5%)               | 13 (7.6%)               | 13 (7.5%)               |
| <b>4 - Gangrene of toes or forefoot</b>                                                                                                                                                                                                                  | 3 (0.9%)                | 1 (0.6%)                | 2 (1.1%)                |
| <b>5 - Midfoot or hindfoot gangrene</b>                                                                                                                                                                                                                  |                         |                         |                         |
| <b>Peripheral arterial occlusive disease (PAOD)</b>                                                                                                                                                                                                      | 244 of 345 (70.7%)      | 121 of 171 (70.8%)      | 123 of 174 (70.7%)      |
| <b>PAOD with critical limb ischemia (persistent pain at rest with regular analgesia for a period of 2 weeks while nerve function is maintained or the occurrence of ulceration or gangrene of the foot or toes with a systolic blood pressure of the</b> | 26 of 243 (10.7%)       | 15 of 121 (12.4%)       | 11 of 122 (9.0%)        |

|                                                                                                        |                    |                    |                    |
|--------------------------------------------------------------------------------------------------------|--------------------|--------------------|--------------------|
| <b>ankle below 50 mmHg or a systolic toe pressure below 30 mmHg or tcPO<sub>2</sub> &lt; 20 mmHg )</b> |                    |                    |                    |
| <b>No chronic venous insufficiency (CVI)</b>                                                           | 259 of 302 (75.1%) | 132 of 150 (77.2%) | 127 of 152 (73%)   |
| <b>CVI Widmer I</b>                                                                                    | 25 of 302 (7.2%)   | 11 of 150 (6.4%)   | 14 of 152 (8%)     |
| <b>CVI Widmer II</b>                                                                                   | 12 of 302 (3.5%)   | 3 of 150 (1.8%)    | 9 of 152 (5.2%)    |
| <b>CVI Widmer III</b>                                                                                  | 6 of 302 (1.7%)    | 4 of 150 (2.3%)    | 2 of 152 (1.1%)    |
| <b>Presence of extreme foot deformities and malpositions of toes, foot or the entire limb</b>          | 59 of 342 (17.1%)  | 26 of 170 (15.2%)  | 33 of 172 (19%)    |
| <b>Untreated or therapy-refractory inflammation in the wound area</b>                                  | 15 of 343 (4.3%)   | 7 of 170 (4.1%)    | 8 of 173 (4.6%)    |
| <b>Presence of a heel necrosis</b>                                                                     | 23 of 342 (6.7%)   | 10 of 168 (5.8%)   | 13 of 174 (7.5%)   |
| <b>No lymphedema</b>                                                                                   | 282 of 340 (81.7%) | 139 of 167 (81.3%) | 143 of 173 (82.2%) |
| <b>Primary lymphedema</b>                                                                              | 12 of 340 (3.5%)   | 5 of 167 (2.9%)    | 7 of 173 (4%)      |
| <b>Secondary lymphedema</b>                                                                            | 46 of 340 (13.3%)  | 23 of 167 (13.5%)  | 23 of 173 (13.2%)  |
| <b>Clinical signs of inflammation (suspected infection)</b>                                            | 159 of 344 (46.1%) | 83 of 170 (48.5%)  | 76 of 174 (43.7%)  |
| <b>Local wound swab as part of the clinical routine</b>                                                | 248 of 343 (71.9%) | 126 of 170 (73.7%) | 122 of 173 (70.1%) |
| <b>Detection of germs within the local wound swab</b>                                                  | 205 of 247 (59.4%) | 104 of 125 (60.8%) | 101 of 122 (58%)   |
| <b>Hemoglobin</b>                                                                                      |                    |                    |                    |
| <b>N</b>                                                                                               | 177 of 345         | 86 of 171          | 91 of 174          |
| <b>Mean (SD)</b>                                                                                       | 9.5 (3,2)          | 9.6 (3.1)          | 9.4 (3.3)          |
| <b>Hemoglobin A1c (HbA1c)</b>                                                                          |                    |                    |                    |
| <b>N</b>                                                                                               | 32 of 345          | 13 of 171          | 19 of 174          |
| <b>Mean (SD)</b>                                                                                       | 15.6 (18,3)        | 16.8 (16,7)        | 14.7 (19.6)        |
| <b>Requiring dialysis</b>                                                                              | 29 of 343 (8.4 %)  | 15 of 170 (8.8%)   | 14 of 173 (8.0%)   |
| <b>Application of skin or dermal substitutes and with living cells that produce growth factors</b>     | 0 of 341 (0%)      | 0 of 169 (0%)      | 0 of 172 (0%)      |

354 Table 2: The table shows the baseline of the identified factors possibly influencing wound closure in the ITT population.  
 355 Findings, diagnoses and procedures documented by the investigators are presented. Data are Number (N), Percentage (%),  
 356 Mean and Standard Deviation (SD), and Minimum – Maximum [Min – Max].

357

358 Details on revascularization performed before study start are shown in Table 3.

| <b>Revascularization before study start in the ITT population</b> | <b>Total<br/>N=345</b> | <b>NPWT<br/>N=171.</b> | <b>SMWC<br/>N=174.</b> |
|-------------------------------------------------------------------|------------------------|------------------------|------------------------|
| <b>Performed revascularization before study start</b>             | 23 of 345 (6.7%)       | 9 of 171 (5.3%)        | 14 of 174 (8.0%)       |

|                                                      |                |               |                  |
|------------------------------------------------------|----------------|---------------|------------------|
| <b>Percutaneous transluminal angioplasty (PTA)</b>   | 13 of 23 (57%) | 6 of 9 (67%)  | 7 of 9 (50%)     |
| <b>PTA + Stent</b>                                   | 1 of 23 (4%)   | 0 of 9 (0%)   | 1 of 9 (7%)      |
| <b>Veins-Bypass</b>                                  | 5 of 23 (22%)  | 2 of 9 (22%)  | 3 of 9 (21%)     |
| <b>Polytetrafluoroethylene (PTFE) Bypass</b>         | 1 of 23 (4%)   | 0 of 9 (0%)   | 1 of 9 (7%)      |
| <b>Thromboendarterectomy and patch plastic</b>       | 2 of 23 (9%)   | 0 of 9 (0%)   | 2 of 9 (14%)     |
| <b>Revascularization with influence on the wound</b> | 22 of 23 (96%) | 9 of 9 (100%) | 13 of 14 (93.9%) |
| <b>Sufficient revascularization result*</b>          | 20 of 23 (88%) | 7 of 9 (78%)  | 13 of 14 (93%)   |
| <b>Insufficient revascularization result</b>         | 2 of 23 (9%)   | 1 of 9 (11%)  | 1 of 14 (7%)     |
| <b>Revascularization result not assessable</b>       | 1 of 23 (4%)   | 1 of 9 (11%)  | 0 of 14 (0%)     |

359 Table 3: The table shows revascularizations performed in the ITT population before study start. Data are N (%). \* Sufficient  
 360 revascularization result was defined as successful recanalization of the tibial artery in which the foot lesion is located or, if it  
 361 is technically impossible to recanalize the respective artery, achievement of an unhindered inflow into at least one of the tibial  
 362 vessels. The evaluation of the revascularization result was in the discretion of the attending physician.

#### 364 Results for the primary outcome wound closure in the ITT population

365 In the ITT population, there was no significant difference between the treatment arms for either wound closure  
 366 rate (Table 4) or time to complete wound closure ( $p=0.244$ , Log-Rank test; Figure 2) within 16 weeks. Beginning  
 367 in week five the number of study participants with open wounds in the NPWT-arm was lower than in the SMWC-  
 368 arm (Figure 2). However, after 16 weeks, the difference between the treatment arms was only 2.5% [-4.7 - 9.7]  
 369 (Table 4). Wounds treated with NPWT were approximately at the same risk of remaining open as wounds treated  
 370 with SMWC (RR 0.97 [95% CI: 0.89-1.06]).

| <b>Wound closure rate in the ITT population</b>                                      | <b>Total<br/>N=345</b> | <b>NPWT<br/>N=171</b> | <b>SMWC<br/>N=174</b> | <b>Difference<br/>p*</b> |
|--------------------------------------------------------------------------------------|------------------------|-----------------------|-----------------------|--------------------------|
| <b>Patients with complete, sustained and confirmed wound closure within 16 weeks</b> |                        |                       |                       |                          |
| <b>N</b>                                                                             | 46 of 345              | 25 of 171 14.6%       | 21 of 174 12.1%       | 4                        |
| <b>%</b>                                                                             | 13.3 %                 | [9.5 –21.6]           | [7.5 – 18.4]          | 2.5%                     |
| <b>[95% CI]</b>                                                                      | [9.8 – 17.8]           |                       |                       | [-4.7 - 9.7]             |
|                                                                                      |                        |                       |                       | 0.53                     |

|                                                                                                                            |              |              |              |               |
|----------------------------------------------------------------------------------------------------------------------------|--------------|--------------|--------------|---------------|
| <b>Patients with recurrence of the diabetic foot wound after complete, sustained and confirmed closure within 6 months</b> |              |              |              |               |
| <b>N</b>                                                                                                                   | 1 of 46      | 1 of 25      | 0 of 21      | 1             |
| <b>%</b>                                                                                                                   | 2.2%         | 4%           | 0%           | 4%            |
| <b>[95% CI]</b>                                                                                                            | [0,1 – 12,1] | [0,1 – 22,3] | [0,0 – 14,3] | [-3.7 – 11.7] |
|                                                                                                                            |              |              |              | 1.00          |

372 Table 4: The table shows the number of patients with wound closure (wound closure rate) and the number of patients with  
 373 recurrences (recurrence rate) in the ITT population. Data show the number (N) of participants available for the analysis in  
 374 total and for both treatment arms. Wound closures within the maximum study treatment time of 16 weeks and recurrences  
 375 during the Follow up of 6 months are shown with the number (N), the percentage (%) of patients, and the 95% Confidence  
 376 Interval (CI). \*F=Fisher's Exact Test.

377  
 378 Since the cumulative number of patients with open wounds was more than 70% after 16 weeks, we could not  
 379 calculate medians for the time to wound closure.

#### 380 381 Results for the secondary outcomes in the ITT population

382 Only one recurrence of the foot wound after complete, sustained and confirmed closure was documented for one  
 383 study participant in the NPWT arm (Table 4). Study participants treated with NPWT were at higher risk for a  
 384 recurrence than participants treated with SMWC 0.96 [0.87-1.04].

385 After 6 months the number of study participants with closed wounds was higher in the SMWC- than in the NPWT-  
 386 arm (36 of 174 [20.7 %] vs 24 of 171 [14.0 %]), but the difference was not significant (p 0.12).

387 The time until optimal preparation of the wound for further treatment to achieve a complete epithelization (min 95  
 388 % granulation tissue) was significantly shorter for patients treated with NPWT (p 0.021) (Table 5).

389

| <b>Time until optimal preparation of the wound bed (min 95 % granulation tissue) within 16 weeks (days) in the ITT population N<sub>available</sub></b> | <b>Total<br/>N=183</b> | <b>NPWT<br/>N=100</b> | <b>SMWC<br/>N=83</b> | <b>Mean<br/>difference<br/>[95% CI]<br/>p*</b> |
|---------------------------------------------------------------------------------------------------------------------------------------------------------|------------------------|-----------------------|----------------------|------------------------------------------------|
| values                                                                                                                                                  |                        |                       |                      |                                                |
| <b>Mean (SD)</b>                                                                                                                                        | 42.7 (39.0)            | 35.6 (34.6)           | 51.4 (42.6)          | 15.8                                           |
| <b>Median (IQR)</b>                                                                                                                                     | 31 (64)                | 22.0 (48.0)           | 49.0 (53.6)          | [4.6 - 27.0]                                   |
| <b>Min - Max</b>                                                                                                                                        | 0 - 127                | 0 - 127               | 0 - 115              | <b>0.008</b>                                   |

390 Table 5: The table shows time until optimal preparation of the wound for further treatment (min 95 % granulation tissue for  
 391 the ITT population. Data show the number (N) of participants available for the analysis in total and for both treatment arms.  
 392 Time until optimal preparation of the wound is described with Mean and Standard Deviation (SD); Median and Inter Quartile  
 393 Range (IQR); and Minimum (Min) and Maximum (Max). \*Student's t-test

394  
 395 In the ITT population, wound surface area and wound volume were similar at baseline (Table 1) and decreased  
 396 continuously during the study treatment time of 16 weeks in both treatment arms (Supplement Tables 2 and 3).  
 397 The values are largely scattered. Measurements derived from the blinded photo analysis using the Wound Healing  
 398 Analyzing Tool (W.H.A.T.) were smaller than the values documented by the clinical investigators.  
 399 Wound tissue composition (Supplement Table 4) was similar in both treatment arms at baseline. Granulation tissue  
 400 values increased during the study treatment period of 16 weeks and fibrin values decreased, with clinically  
 401 documented values showing only minor differences between treatment arms. The values for necrotic tissue were  
 402 very low and did not differ relevantly between the treatment arms. The results of the W.H.A.T. evaluation for  
 403 granulation and fibrin deviate markedly from the values documented by the clinical investigators.  
 404 Patients treated with NPWT were approximately at the same risk of undergoing an amputation or resection like  
 405 patients treated with SMWC (RR: 0.99 [95%CI: 0.65-1.50]) (Table 6).

406

| <b>Amputations and resections<br/>in the ITT population</b>           | <b>Total<br/>N=345</b> | <b>NPWT<br/>N=171</b> | <b>SMWC<br/>N=174</b> | <b>Difference<br/>p</b> |
|-----------------------------------------------------------------------|------------------------|-----------------------|-----------------------|-------------------------|
| <b>Study participants with amputation<br/>or resection</b>            |                        |                       |                       |                         |
| <b>N</b>                                                              | 71                     | 35                    | 36                    | 1                       |
| <b>%</b>                                                              | 20.6%                  | 20.5%                 | 20.7%                 | 0.2 %                   |
| <b>[95% CI]</b>                                                       | [16.3 – 24,8]          | [14,4 – 26,5]         | [14.7 – 26,7]         | [-19.0 - 18.6]          |
|                                                                       |                        |                       |                       | 1.00 (F)                |
| <b>Total number of amputations and<br/>resections</b>                 | 102                    | 45                    | 57                    | 12<br>0.89 (U)          |
| <b>Number of amputations and<br/>resections per study participant</b> |                        |                       |                       |                         |
| <b>One event N (%)</b>                                                | 49 (14.2%)             | 25 (14.6%)            | 24 (13.8%)            | 1 (0.8%)                |
| <b>Two events N (%)</b>                                               | 16 (4.6%)              | 10 (5.8%)             | 6 (3.4%)              | 4 (2.4%)                |
| <b>Three events N (%)</b>                                             | 4 (1.2%)               | 0 (0%)                | 4 (2.3%)              | 4 (2.3%)                |
| <b>Four events N (%)</b>                                              |                        |                       | 1 (0.6%)              | 1 (0.6%)                |

|                                                 |            |            |            |                      |
|-------------------------------------------------|------------|------------|------------|----------------------|
| <b>Five events N (%)</b>                        | 1 (0.3%)   | 0 (0%)     | 1 (0.6%)   | 1 (0.6%)             |
|                                                 | 1 (0.3%)   | 0 (0%)     |            | 0.89 (U)             |
| <b>Study participants with minor amputation</b> | 69 (20.0%) | 33 (19.3%) | 36 (20.7%) | 3 (1.4%)<br>0.79 (F) |
| <b>Study participants with major amputation</b> | 2 (0.6%)   | 2 (1.2%)   | 0 (0%)     | 2 (1.2%)<br>0.25 (F) |

407 Table 6: The table shows the number of study participants with amputations / resections and the number of amputations /  
408 resections performed for the ITT-population. Data show the number (N) of participants, the percentage with the 95%  
409 Confidence Interval (95% CI), or the number of events accompanied with the respective percentage values in total and for both  
410 treatment arms. F = Fisher's Exact Test; U = Mann-Whitney U-Test.

411  
412 Overall, pain levels were very low and decreased further during the study treatment time (Supplement Table 5).  
413 The values hardly differ between the treatment arms at any observation time point.

414 At baseline, Quality of life (EQ5D) was significantly limited in both treatment arms (Supplement Table 6). EQ5D  
415 levels were improved in both study participants reaching end of therapy as well as end of maximum treatment  
416 time. On follow-up after 6-months, all patients still showed increased EQ5D levels in both treatment arms.

#### 417 Safety results

418  
419 The number of study participants with AEs was significantly higher in the NPWT arm (96 (56.1%)) than in the  
420 SMWC arm (72 (41.4%)) (p=0.007) but only 16 (10.2%) of the AEs in the NPWT arm were decided by the  
421 investigators to have a definite relation to the medical device (Table 7). The number of study participants with at  
422 least one AE documented to be serious (SAE) was not significantly different between the treatment arms (NPWT  
423 N=63 (36.8%); SMWC N=58 (33.3%); p=0.50) (Table 7). None of the SAEs in the NPWT-arm was documented  
424 as definitely or possibly related to the medical device by the investigators. 9 of 171 (5.3%) study participants in  
425 the NPWT arm and 6 of 174 (3.5%) study participants in the SMWC-arm died during the study.

426

| <b>Adverse events (AEs) and Serious adverse events (SAEs)</b> | <b>Total<br/>N=345</b> | <b>NPWT<br/>N=171</b> | <b>SMWC<br/>N=174</b> | <b>Difference</b>           |
|---------------------------------------------------------------|------------------------|-----------------------|-----------------------|-----------------------------|
| Study participants with at least one AE                       |                        |                       |                       |                             |
| N (%)                                                         | 168 (48.7%)            | 96 (56.1%)            | 72 (41.4%)            | 24 (14.7%)                  |
| [95% CI]                                                      | [43,4 -54,0]           | [48,7 - 63,6]         | [34,1 - 48,7]         | [4.3 - 25.1]<br>p=0.007 (F) |

|                                                  |               |               |               |                             |
|--------------------------------------------------|---------------|---------------|---------------|-----------------------------|
| Study participants with one AE                   |               |               |               |                             |
| N                                                | 103           | 54            | 49            | 5                           |
| Study participants with two or more AEs          |               |               |               |                             |
| N                                                | 65            | 42            | 23            | 19                          |
| Total number of AEs                              |               |               |               |                             |
| N                                                | 269           | 167           | 102           | 65                          |
| AEs with relationship to the medical device      |               |               |               |                             |
| N <sub>available</sub>                           | 257           | 157           | 100           | 57                          |
| Yes                                              | 16 (6.2%)     | 16 (10.2%)    | 0 (0%)        | 16 (10.2%)                  |
| Possible                                         | 13 (5.1%)     | 11 (7.0%)     | 2 (2.0%) *    | 9 (5%)                      |
| No                                               | 211 (82.1%)   | 117 (74.5%)   | 94 (94.0%)    | 23 (19.5%)                  |
| Not assessable                                   | 17 (6.6%)     | 13 (8.3%)     | 4 (4.0%)      | 9 (4.3%)                    |
| AEs with relationship to SMWC                    |               |               |               |                             |
| N <sub>available</sub>                           | 185           | 110           | 75            | 35                          |
| Yes                                              | 2 (1.1%)      | 0 (0%)        | 2 (2.7%)      | 2 (2.7%)                    |
| Possible                                         | 5 (2.7%)      | 5 (4.5%)      | 0 (0%)        | 5 (4.5%)                    |
| No                                               | 163 (88.1%)   | 96 (87.3%)    | 67 (89.3%)    | 29 (2%)                     |
| Not assessable                                   | 15 (8.1%)     | 9 (8.2%)      | 6 (8.0%)      | 3 (0.2%)                    |
| AEs with relationship to the treatment procedure |               |               |               |                             |
| N <sub>available</sub>                           | 244           | 148           | 96            | 52                          |
| Yes                                              | 10 (4.1%)     | 6 (4.1%)      | 4 (4.2%)      | 2 (0.1%)                    |
| Possible                                         | 17 (7.0%)     | 15 (10.1%)    | 2 (2.1%)      | 13 (8%)                     |
| No                                               | 191 (78.3%)   | 111 (75.0%)   | 80 (83.3%)    | 31 (8.3%)                   |
| Not assessable                                   | 26 (10.7%)    | 16 (10.8%)    | 10 (10.4%)    | 6 (0.4%)                    |
| Study participants with at least one SAE         |               |               |               |                             |
| N (%)                                            | 121 (35.1%)   | 63 (36.8%)    | 58 (33.3%)    | 5 (3.5%)                    |
| [95% CI]                                         | [30,0 – 40,1] | [29,6 – 44,1] | [26,3 – 40,3] | [-6.6 – 13.6]<br>p=0.50 (F) |
| Study participants with one SAE                  |               |               |               |                             |
| N                                                | 90            | 45            | 45            | 0                           |
| Study participants with two or more SAEs         |               |               |               |                             |
| N                                                | 31            | 18            | 13            | 5                           |
| Total number of SAEs                             |               |               |               |                             |
| N                                                | 163           | 87            | 76            | 11                          |



|                                                   |             |            |            |           |
|---------------------------------------------------|-------------|------------|------------|-----------|
| SAEs with relationship to the medical device      |             |            |            |           |
| N <sub>available</sub>                            | 161         | 85         | 76         | 9         |
| Yes                                               | 0 (0%)      | 0 (0%)     | 0 (0%)     | 0 (0%)    |
| Possible                                          | 0 (0%)      | 0 (0%)     | 0 (0%)     | 0 (0%)    |
| No                                                | 154 (95.7%) | 79 (92.9%) | 75 (98.7%) | 4 (5.8%)  |
| Not assessable                                    | 7 (4.3%)    | 6 (7.1%)   | 1 (1.3%)   | 5 (5.8%)  |
| SAEs with relationship to SMWC                    |             |            |            |           |
| N <sub>available</sub>                            | 121         | 64         | 57         | 7         |
| Yes                                               | 1 (0.8%)    | 0 (0%)     | 1 (1.8%)   | 1 (1.8%)  |
| Possible                                          | 1 (0.8%)    | 1 (1.6%)   | 0 (0%)     | 1 (1.6%)  |
| No                                                | 113 (93.4%) | 57 (89.1%) | 56 (98.2%) | 1 (9.1%)  |
| Not assessable                                    | 6 (5.0%)    | 6 (9.4%)   | 0 (0%)     | 6 (9.4%)  |
| SAEs with relationship to the treatment procedure |             |            |            |           |
| N <sub>available</sub>                            | 156         | 84         | 72         | 12        |
| Yes                                               | 4 (2.6%)    | 0 (0%)     | 4 (5.6%)   | 4 (5.6%)  |
| Possible                                          | 2 (1.3%)    | 2 (2.4%)   | 0 (0%)     | 2 (2.4%)  |
| No                                                | 140 (89.7%) | 74 (88.1%) | 66 (91.7%) | 8 (10.6%) |
| Not assessable                                    | 10 (6.4%)   | 8 (9.5%)   | 2 (2.8%)   | 6 (6.7%)  |

Table 7: The table shows the number of study participants with Adverse Events (AEs) and Serious Adverse Events (SAEs) and the number of AEs and SAEs for the ITT-population. Data show the number (N) and the percentage (%) in total and for both treatment arms. \* No treatment change to NPWT has been documented. F = Fisher's Exact Test (alpha=0.05).

### Secondary analyses and subgroups

Of the factors with possible influence on the outcomes identified during study planning, the covariate peripheral arterial occlusive disease was found to have significant influence on the endpoint time until wound closure (p 0.026, Log Rank Test). The covariate clinical signs of inflammation (suspected infection) had a significant influence on the wound closure rate (p 0.012, Chi-square test) in the univariate analysis of the primary endpoints. However, both covariates were almost equally represented in both treatment arms. Thus, the comparison of the treatment arms was not influenced by these confounders. Furthermore, the covariate suspected infection was found to be significantly associated with both wound closure rate (Logistic regression; p=0.027) and time until wound closure (Cox-regression; p=0.037) in the multivariate confounder analysis. Wound closure was significantly less likely in wounds with suspected infection (Odds ratio 0.38).

1  
2  
3 442 In the subgroup of large wounds (wound surface area at randomization shown in Table 1), wound closure rate  
4  
5 443 within 16 weeks was significantly higher in the NPWT-arm (13 of 88 (14.8 [7.4 – 22.2] %)) than in the SMWC-  
6  
7 444 arm (5 of 84 (6.0 [0.9 – 11.0] %)) (Difference: N=8 (8.8 [-0.2 - 17.8] %), p=0.08). Study participants with large  
8  
9 445 wounds had a lower risk of not achieving wound closure within 16 weeks when treated with NPWT (RR 0.91  
10  
11 446 [95% CI: 0.82-1.0]) and achieved wound closure significantly faster in the NPWT-arm than in the SMWC-arm (p  
12  
13 447 0.027) (Figure 3). The only recurrence occurred in the subgroup of large wounds. Both major amputations were  
14  
15 448 performed in study participants with large wounds treated with NPWT.

16 449 In the subgroup of small wounds (wound surface area at randomization shown in Table 1), the time to reach 95 %  
17  
18 450 granulation tissue was significantly shorter for the patients treated with NPWT than for those treated with SMWC  
19  
20 451 (p 0.005), but wound closure rate and time until wound closure within 16 weeks were not significantly different  
21  
22 452 between the treatment arms (Figure 4). Further details of the subgroup analyses are presented in the Supplement  
23  
24 453 Tables 7 and 8.

25  
26 454

#### 27 28 455 Results for the primary and secondary outcomes in the PP population

29  
30 456 Demographics, relevant baseline characteristics and the results of the revascularization before study start of the PP  
31  
32 457 population are presented in Supplement Table 9. In the PP population, 14 of 44 study participants (31.8% [95%CI  
33  
34 458 18.1 -45.6]) treated with NPWT and 19 of 110 participants (17.3% [95%CI 10.2 – 24.3]) .treated with SMWC  
35  
36 459 achieved complete, sustained and verified wound closure within 16 weeks, but the difference was not significant  
37  
38 460 (5 (14.5% [95%CI -1.0 – 30.0]; p 0.053). Wounds treated with NPWT had a lower risk of remaining open after 16  
39  
40 461 weeks (RR 0.82 [95%CI: 0.66-1.03]) than wounds treated with SMWC. Time to wound closure in the NPWT arm  
41  
42 462 was significantly shorter than in the SMWC-arm (p=0.004) (Figure 5). After 6 months, wound closure rate in the  
43  
44 463 SMWC-arm (30 of 110 (27.3% [95%CI 18.9 – 35.6]) was higher than in the NPWT-arm 11 of 44 (25.0% [95%CI  
45  
46 464 12.2 – 37.8]), but the difference was not significant (N=19 (2.3% [-13.0 – 17.6]); p 0.84). As in the ITT population,  
47  
48 465 optimal wound bed preparation was achieved significantly faster in patients receiving NPWT (p<0.001). No  
49  
50 466 recurrences occurred after complete, sustained and confirmed wound closure in the PP population. Neither the  
51  
52 467 number of patients with amputations or resections nor the number of amputations or resections performed .differed  
53  
54 468 significantly between the treatment arms. No major amputations were performed in the PP population. Further  
55  
56 469 details on the results for the PP population are presented in the Supplement Tables 10 – 16.

57 470

#### 58 471 Treatment compliance

1  
2  
3 472 29 (17.0%) patients in the NPWT-arm had a temporary therapy change to SMWC (mean duration  $20.5 \pm 21.6$   
4  
5 473 days). In the SMWC group, 17 (9.8%) patients had a temporary therapy change to NPWT (mean duration  $28.9 \pm$   
6  
7 474  $21.6$  days). For only 2 of the 29 NPWT patients (6.9%) with a temporary therapy change to SMWC the wound  
8  
9 475 closure was achieved within 16 weeks, whereas 16.2% (23 von 142) of the wounds of the NPWT patients without  
10  
11 476 therapy change were completely closed.

12  
13 477 A total of 57.3% (98 of 171) of the patients randomized to NPWT completed treatment before achieving a  
14  
15 478 granulation surface of the wound of at least 95%. Fewer patients with this premature end of NPWT (4.7%, N=8)  
16  
17 479 achieved a complete wound closure than patients with no premature end of therapy (9.9, N=17). Mean NPWT-  
18  
19 480 duration until premature end of therapy was 28.5 days (SD 24.1), while a mean granulation area of 59.6% (SD 30.  
20  
21 481 5) was achieved. For 131 patients (76.6%) in the NPWT arm less than the required three dressing changes per  
22  
23 482 week were documented. 19 patients (14.5%) with this protocol violation achieved a complete wound closure. Six  
24  
25 483 (15.4%) of the 39 NPWT patients who received at least 3 therapy changes per week achieved a complete wound  
26  
27 484 closure.

28 485

#### 29 486 Documentation quality

30  
31  
32 487 In the NPWT-arm 52 study participants and in the SMWC-arm 43 participants were excluded from the PP  
33  
34 488 population due to missing documentation until the end of maximum treatment time or at wound closure  
35  
36 489 confirmation (Figure 1). In the electronic Case Report Forms (eCRF) a wound closure was documented for 96  
37  
38 490 patients (NPWT 56 of 171; SMWC 40 of 174), but only for 46 participants (NPWT 25; SMWC 21) all criteria for  
39  
40 491 a complete, verified and sustained wound closure have been met. For the wound closure visit seven wound  
41  
42 492 photographs (NPWT 7; SMWC 0) and for the wound closure confirmation visit four photographs (NPWT 3;  
43  
44 493 SMWC 1) were missing. In addition, two of the existing wound photographs for wound closure (NPWT 0; SMWC  
45  
46 494 2) and two photographs for wound closure confirmation (NPWT 1; SMWC 3) were not assessable by the blinded  
47  
48 495 observers due to serious quality issues. Furthermore 23 (NPWT 15; SMWC 8) existing and assessable wound  
49  
50 496 photographs were not able to confirm the wound closure and 3 (NPWT 1; SMWC 2) photographs were not able  
51  
52 497 to confirm the wound closure after 14 days.

53 498

#### 54 499 **Discussion**

55  
56  
57 500 The DiaFu-study did not demonstrate significant superiority in wound closure rate or time to complete wound  
58  
59 501 closure for neither NPWT nor SMWC. Wound closure rates were higher in the NPWT arm but did not significantly  
60  
502 differ from those in the SMWC arm. Time to wound healing in the NPWT group was lower than in the SMWC

1  
2  
3 503 arm while the difference between the treatment arms becomes statistically significant only in the PP population.  
4  
5 504 Thus, with this study we were not able to confirm our hypothesis that wound closure can be achieved more often  
6  
7 505 and faster with NPWT than with SMWC when used in German real-life clinical practice. Previous RCTs, which  
8  
9 506 were the basis for sample size calculation, showed a higher rate and a significant superiority in healing when using  
10  
11 507 NPWT on amputation and chronic wounds [16, 17], but the populations of these studies were different. Other than  
12  
13 508 the Armstrong-study, the DiaFu-study did not exclude patients with venous insufficiency and included more than  
14  
15 509 twice as many patients. The studies of Armstrong and Blume excluded patients with Wagner stage four; active  
16  
17 510 Charcot; uncontrolled hyperglycemia and therapy with glucocorticoids, immunosuppressants or chemotherapy;  
18  
19 511 and required proof of adequate perfusion. The DiaFu-study, did not exclude patients with impaired perfusion, but  
20  
21 512 required adequate therapy of the circulatory disorder according to clinical practice guidelines. In the DiaFu-study,  
22  
23 513 we were able to show that the presence of PAOD at randomization had a significant influence on the time to wound  
24  
25 514 closure but not on the overall wound closure rate within the maximum study treatment time. The number of patients  
26  
27 515 with critical limb ischemia at baseline was low and differed only slightly between the treatment arms. As in clinical  
28  
29 516 practice, in the DiaFu-study adequate treatment of concomitant diseases was mandatory. Invasive therapy of  
30  
31 517 POAD could be performed before initiation of wound therapy as well as during the study treatment period, if the  
32  
33 518 wound needed pretreatment as a basis for the revascularization procedure or if new or recurrent critical ischemia.  
34  
35 519 The presence of clinical signs of inflammation (suspected infection) at randomization had a significant effect on  
36  
37 520 both, time to wound closure and wound closure rate within 16 weeks. Both covariates were equally represented in  
38  
39 521 the treatment arms, thus the differences in time until wound closure and wound closure rate were not affected by  
40  
41 522 these confounders.  
42  
43 523 However, the probably most serious factors negatively influencing treatment and outcome are documentation  
44  
45 524 deficiencies and deviations from treatment guidelines. Temporary therapy changes and premature therapy  
46  
47 525 cessation negatively impacted the patient relevant treatment outcome wound closure in study participants treated  
48  
49 526 with NPWT. Missing study visits resulting in low numbers of complete endpoint documentations strongly affected  
50  
51 527 the proof of the outcome wound closure in both, the NPWT- and the SMWC-arm.  
52  
53 528 Optimal preparation of the wound bed (95% granulation tissue) was achieved significantly earlier when using  
54  
55 529 NPWT in the ITT and the PP population, but the overall rate of wound closures was low. Wound bed preparation  
56  
57 530 and granulation tissue formation are important prerequisites for wound healing, but are not a proof of treatment  
58  
59 531 effectiveness and cannot serve as a basis for benefit assessment.  
60  
532 Although significantly more AEs were documented in the NPWT-arm only a small number of these events were  
533 related to the medical device according to the investigator's assessment. Mortality rates were very low in both

1  
2  
3 534 treatment arms and there was no significant difference between the treatment arms regarding amputations and  
4  
5 535 resections performed during the study. Only two major amputations have been performed in patients with big  
6  
7 536 wounds treated with NPWT. None of the treatments resulted in an additional impairment of the patients' quality  
8  
9 537 of life during study treatment time or follow up. Time until complete wound closure was significantly shorter with  
10  
11 538 NPWT than with SMWC in the subgroup of big wounds, which indicates that NPWT has the potential to be a  
12  
13 539 valuable treatment option for this kind of wounds.

14  
15 540 In the DiaFu-study methods against bias have been implemented whenever possible in order to avoid bias that  
16  
17 541 have been described by several systematic reviews [18-22], but blinding of study participants as well as attending  
18  
19 542 physicians and nurses was not possible due to the nature of NPWT..

20  
21 543 Not addressing and analyzing all factors influencing the overall treatment outcome like targeted pressure relief,  
22  
23 544 continuous infection control and adequate treatment of the underlying disease during the study treatment and  
24  
25 545 observation period may be seen as a limitation of this health care research study. Study sites have been selected  
26  
27 546 based on a self-disclosure by means of a qualification checklist and cross checks using quality reports. This ensured  
28  
29 547 that all prerequisites were met for guideline-compliant patient care. Nevertheless, even in the application of NPWT  
30  
31 548 there were deviations from the standards.

32  
33 549 In order to support the decision-making process of the German G-BA on general reimbursement of NPWT in  
34  
35 550 German outpatient care the real-life clinical practice DiaFu-study included patients with chronic DFUs of  
36  
37 551 neuropathic and angiopathic origin regardless of whether a simple wound cleansing, tissue debridement or even  
38  
39 552 amputation was necessary prior to application of wound therapy targeted to achieve complete wound closure. The  
40  
41 553 study was performed without excluding concomitant diseases negatively impacting wound healing; with therapy  
42  
43 554 application in the discretion of the attending physician; and with evaluation of patient relevant outcome. Thus,  
44  
45 555 results can easy be generalized and applied in clinical practice settings. Anyway, shortcomings in data quality  
46  
47 556 negatively impacted the study results and statements about specific patient groups were not possible. A high  
48  
49 557 number of study participants needed to be excluded from the PP population (NPWT 127 of 171 (74%), SMWC  
50  
51 558 arm 64 of 174 (37%). For most of these participants, documentation was lacking until the end of the maximum  
52  
53 559 treatment period (Total=88, NPWT=49, SMWC=39) (Figure 1). In the primary analysis based on the ITT  
54  
55 560 population it was assumed that these patients did not achieve wound closure within 16 weeks study treatment and  
56  
57 561 observation time (using the last observation carried forward (LOCF) method, the open wound status was "carried  
58  
59 562 forward" until the end of the maximum treatment period. This may have led to a false negative bias in the outcome  
60  
563 wound closure in the ITT population. Due to the high loss of patients and the difference in the number of  
564  
564 participants excluded from the treatment arms, the validity of the PP analysis is very limited.

1  
2  
3 565  
4  
5 566  
6  
7 567  
8  
9 568  
10  
11 569  
12  
13 570  
14  
15 571  
16  
17 572  
18  
19 573  
20  
21 574  
22  
23 575  
24  
25 576  
26  
27 577  
28  
29 578  
30  
31 579  
32  
33 580  
34  
35  
36  
37  
38  
39  
40  
41  
42  
43  
44  
45  
46  
47  
48  
49  
50  
51  
52  
53  
54  
55  
56  
57  
58  
59  
60

## Conclusions

NPWT was not superior to SMWC when evaluated in German real-life clinical practice. Missing compliance with therapy guidelines and poor documentation quality led to restrictions in achieving the patient-relevant endpoint complete wound closure and prevents a clear proof of effectiveness. The question if NPWT is superior to SMWC for treating diabetic foot wounds remains unanswered due to the limitations of the DiaFu-study. Although the study protocol required adequate monitoring and therapy of the concomitant diseases, the presence of POAD and infection at randomization had a significant influence on the outcome wound closure. Despite all limitations NPWT showed a significant superiority in optimal wound bed preparation. This indicates that NPWT works according to its intended use and has a potential to be a valuable treatment option. The results of the PP population suggest that without the negative impact of premature treatment cessation, temporary changes of the randomized therapy and partly incomplete documentation, NPWT may be more effective for treating diabetic foot wounds than SMWC. In Germany, NPWT should be evaluated again after implementation of a sufficient, well-considered and widely-accepted concept for quality control. In a future health care research study, the treatment outcome before and after the implementation of these quality measures should be evaluated, for which the results of this trial may serve as a basis.

1  
2  
3 **581 Ethics approval and consent to participate**  
4

5 582 Ethical approval of the main ethical committee (EC): Ethical Committee of the University of Witten-Herdecke,  
6  
7 583 has been fully granted without any conditions. Due to performing the trial according to § 23b MPG (German  
8  
9 584 Medical Device Act), participating study sites in Germany only received a consultation for the main clinical  
10  
11 585 investigator according to professional law by the respective EC. All investigators have been fully approved by the  
12  
13 586 respective ECs. An evaluation of the study's content by ECs of participating study sites in Germany was not  
14  
15 587 applicable. All study participants gave written informed consent prior to randomization and any trial related  
16  
17 588 procedure.  
18

19 589

20 **590 Data sharing**  
21

22 591 The datasets analyzed for the results presented in this article are available from the corresponding author on  
23  
24 592 reasonable request. Datasets are available in German language.  
25

26 593

27  
28 **594 Competing interests**  
29

30 595 All authors have completed the ICMJE uniform disclosure form at [www.icmje.org/coi\\_disclosure.pdf](http://www.icmje.org/coi_disclosure.pdf) and declare:  
31  
32 596 The German statutory health insurance companies commissioned the Witten/Herdecke University (UW/H) to plan,  
33  
34 597 conduct, analyze and publish the study. Dörthe Seidel is an employee of the UW/H. The study has been financed  
35  
36 598 by the manufacturers KCI (Acelity) and Smith&Nephew. Dörthe Seidel received a consulting fee for the  
37  
38 599 presentation of the study during an event organized by the manufacturer Hartmann. During study planning and  
39  
40 600 conduct Edmund Neugebauer was an employee of the UW/H. He was the director of the IFOM.

41 601 The clinical investigators Martin Storck, Holger Lawall, Gernold Wozniak, Peter Maukner, Dirk Hochlenert,  
42  
43 602 Walter Wetzel-Roth, Klemens Sondern, Matthias Hahn, Gerhard Rothenaicher, Thomas Krönert and Karl Zink  
44  
45 603 received a case fee of 1000 € for each patient included in the DiaFu-study in order to compensate for the additional  
46  
47 604 organizational and especially the documentation effort during trial conduct. Furthermore all investigators received  
48  
49 605 compensation for travelling to the investigator meetings. The institutions of the investigators used integrated care  
50  
51 606 contracts for NPWT during study conduct in order to provide best practice for the study participants during  
52  
53 607 outpatient care.

54  
55 608 Gernold Wozniak and Walter Wetzel-Roth are members of the scientific advisory board of the manufacturer  
56  
57 609 Kinetic Concepts Incorporated (KCI) (now Acelity).  
58

59 610

60 **611 Funding**



1  
2  
3 612 Through a European tender the study was initiated by a consortium of 19 statutory German health insurance funds,  
4  
5 613 which provided integrated care contracts for all study participants and for up to 7000 patients with acute and  
6  
7 614 chronic wounds in Germany; defined basic rules for study design based on the requirements of the German  
8  
9 615 authorities; and provided a critical review of the study protocol and the final report. The study was funded by the  
10  
11 616 manufacturers Kinetic Concepts Incorporated (KCI) and Smith & Nephew (S&N). Both companies provided the  
12  
13 617 NPWT devices and associated consumable supplies in the assigned regions of Germany as well as all necessary  
14  
15 618 support and information about the used material. The manufacturers had no role in study design, data collection,  
16  
17 619 data analysis, data interpretation, or writing of the report. All authors had full access to all of the data (including  
18  
19 620 statistical reports and tables) in the study and take full responsibility for the accuracy of the data analysis.

20 621

### 22 622 **Authors' contributions**

23  
24 623 Dörthe Seidel was the principal coordinating investigator. She conceived the study, reviewed the scientific  
25  
26 624 literature, and was responsible for study design, data analysis, data interpretation, writing and reviewing of the  
27  
28 625 report. She is the lead author and takes overall responsibility for this report. She affirms that the manuscript is an  
29  
30 626 honest, accurate, and transparent account of the study being reported; that no important aspects of the study have  
31  
32 627 been omitted; and that any discrepancies from the study as originally planned (and, if relevant, registered) have  
33  
34 628 been explained.

35  
36 629 Martin Storck and Holger Lawall were study investigators and contributed to study design, data collection and  
37  
38 630 interpretation, and reviewed the report.

39  
40 631 Gernold Wozniak, Peter Maukner, Walter Wetzels-Roth and Dirk Hochlenert were study investigators and  
41  
42 632 contributed to data collection and data interpretation and reviewed the report.

43  
44 633 Klemens Sondern, Matthias Hahn, Gerhard Rothenaicher, Thomas Krönert and Karl Zink were study investigators  
45  
46 634 and contributed to data collection and reviewed the report.

47 635 Edmund Neugebauer contributed to study design and data interpretation and reviewed the report.

48  
49 636 All authors approved the final version of the report.

51 637

### 53 638 **Acknowledgements**

54  
55 639 The authors thank all investigators, nurses, patients and partners for supporting the study.

56  
57 640 At least one patient was included in the following facilities: HSK - Dr. Horst Schmidt Kliniken GmbH Klinik für  
58  
59 641 Gefäßchirurgie Ludwig-Erhard-Straße 100 65199 Wiesbaden; Asklepios Westklinikum Hamburg Zentrum für  
60  
642 Gefäßmedizin Suurheid 20 22559 Hamburg; Knappschafts Krankenhaus Bottrop Gefäßchirurgische Klinik



- 1  
2  
3 643 Osterfelderstraße 157 46242 Bottrop; Städtisches Klinikum Karlsruhe Klinik für Gefäß- und Thoraxchirurgie  
4  
5 644 Moltkestraße 90 76133 Karlsruhe; Gemeinschaftspraxis Schlotmann-Hochlenert-Zavaleta-Haberstock Merheimer  
6  
7 645 Straße 217 50733 Köln; Klinikum Döbeln Abt. für Gefäßchirurgie Sörmitzer Straße 10 04720 Döbeln; Klinikum  
8  
9 646 Bielefeld Mitte Klinik für Allgemeine Innere Medizin Teutoburger Straße 50 33604 Bielefeld; Klinikum  
10  
11 647 Frankfurt/Oder Klinik für Gefäßchirurgie Müllroser Chaussee 7 15236 Frankfurt/Oder; Weißeritztal-Kliniken  
12  
13 648 GmbH Medizinische Klinik III Bürgerstraße 7 01705 Freital; Krankenhaus Porz am Rhein Klinik für  
14  
15 649 Gefäßchirurgie Urbacher Weg 19 51149 Köln; St. Remigius Krankenhaus Opladen Innere Medizin An St.  
16  
17 650 Remigius 26 51379 Leverkusen; Marien Hospital Dortmund-Hombruch Klinik für Innere Medizin/Diabetologie  
18  
19 651 Gablonzstraße 9 44225 Dortmund; Zentrum für Chirurgie Klinik für Gefäß- und Endovascularchirurgie Theodor-  
20  
21 652 Stern-Kai 7, Haus 23C/EG 60590 Frankfurt am Main; Facharzt für Chirurgie Thorax-Kardiovaskularchirurgie  
22  
23 653 Hindenburgstraße 1 86807 Buchloe; Helfenstein Klinik Geisslingen Allgemein- und Viszeralchirurgie Eybstraße  
24  
25 654 16 73312 Geislingen/Steige; Paracelsus-Klinik am Silbersee Wundzentrum Hannover Oertzeweg 24 30851  
26  
27 655 Langenhagen; Klinikum Darmstadt Chirurgische Klinik III Grafenstraße 9 64283 Darmstadt; Ortenau Klinikum  
28  
29 656 Offenburg-Ebertplatz Klinik für Allgemein-, Viszeral- und Gefäßchirurgie Ebertplatz 12 77654 Offenburg;  
30  
31 657 Thüringen-Kliniken "Georgius Agricola" GmbH Klinik für Gefäßchirurgie Rainweg 68 07318 Saalfeld; Klinikum  
32  
33 658 Dorothea Christiane Erxleben GmbH Klinik für Allgemein-, Viszeral- und Gefäßchirurgie Ditfurter Weg 24 06484  
34  
35 659 Quedlinburg; Franziskus-Krankenhaus Berlin Abt. für Innere Medizin Budapester Straße 15-19 10787 Berlin;  
36  
37 660 Hegau-Bodensee Klinikum Radolfzell (HBK) Klinik für Innere Medizin Hausherrenstraße 12 78315 Radolfzell;  
38  
39 661 Diabetologische Schwerpunktpraxis Dr. med. Hansjörg Mühlen & Partner Ruhrorter Straße 195 47119 Duisburg;  
40  
41 662 Kliniken Maria Hilf Mönchengladbach Klinik für Gefäßchirurgie und Angiologie Sandradstraße 43 41061  
42  
43 663 Mönchengladbach; Städtisches Klinikum München/Bogenhausen Klinik für Endokrinologie, Diabetologie und  
44  
45 664 Angiologie Englschalkingerstraße 77 81925 München; Gerhard Rothenaicher Facharzt für Chirurgie Cosimastraße  
46  
47 665 2 81927 München; Bürgerhospital Frankfurt am Main Interdisziplinäres Zentrum Diabetischer Fuß (DDG)  
48  
49 666 Nibelungenallee 37- 41 60318 Frankfurt am Main; Gemeinschaftspraxis für Chirurgie und Gefäßmedizin Drs.  
50  
51 667 Alter/Pourhassan/Heim Klosterstraße 12 46145 Oberhausen; Ev. KH Königin Elisabeth Herzberge gGmbH Abt.  
52  
53 668 für Kardiologie, Angiologie und Diabetologie Herzbergstraße 79 10365 Berlin; Städtisches Klinikum Neunkirchen  
54  
55 669 gGmbH Abt. für Gefäßchirurgie & Phlebologie Brunnenstraße 20 66538 Neunkirchen; Westküstenklinikum Heide  
56  
57 670 Klinik für Viszeral- und Gefäßchirurgie Esmarchstraße 50 25746 Heide/Holstein; Chir. Praxisgemeinschaft am  
58  
59 671 Bayenthalgürtel Praxis Dr. med. Gerald Engels Bayenthalgürtel 45 50968 Köln; Malteser Krankenhaus – St.  
60  
672 Franziskus-Hospital Medizinische Klinik I, Abt. für Diabetologie Waldstraße 17 24939 Flensburg; St.  
673 Marienkrankenhaus Siegen gGmbH Klinik für Gastroenterologie Kampenstraße 51 57072 Siegen; Krankenhaus

1  
2  
3 674 Bietigheim Klinik für Innere Medizin, Kardiologie, Endokrinologie, Diabetologie und Internistische  
4  
5 675 Intensivmedizin Riedstraße 12 74321 Bietigheim-Bissingen; Asklepios Kliniken Harburg Eißendorfer Pferdeweg  
6  
7 676 52 21075 Hamburg; Diabetologikum Ludwigshafen Diabetes-Schwerpunktpraxis Ludwigsplatz 9 67059  
8  
9 677 Ludwigshafen; Mariannen-Hospital Werl Abt. für Chirurgie Unnaer Straße 15 59457 Werl; Diabetes Klinik GmbH  
10  
11 678 & Co KG Theodor-Klotzbücher-Straße 12 97980 Bad Mergentheim; Institut für Diabetesforschung Münster  
12  
13 679 GmbH Hohenzollernring 70 48145 Münster.

14 680 The study was initiated by a consortium of 19 statutory German health insurance funds represented by the AOK  
15  
16 681 federal association (AOK-Bundesverband – AOK-BV), the association of alternative health insurance funds  
17  
18 682 (Verband der Ersatzkrankenkassen – vdek) and the minors (Knappschaft). In order to guarantee outpatient care for  
19  
20 683 all study participants without any restrictions, the contracting health insurance companies provided integrated care  
21  
22 684 contracts for outpatient negative pressure wound therapy.

23  
24 685 A project advisory board was implemented to coordinate all processes and project partners. The board comprised  
25  
26 686 two representatives each from the statutory health insurance funds, the management company and the sponsor as  
27  
28 687 well as one representative each from the participating medical device manufacturers (KCI and smith & nephew).  
29  
30 688 Representing the contracting authority (statutory German health insurance funds) Dr. Gerhard Schillinger (AOK-  
31  
32 689 BV) and Ute Leonhard (vdek) acted as contact persons for all aspects of the project.

33  
34 690 The management company “Gesundheitsforen Leipzig” has been entirely responsible for the logistics of the study.  
35  
36 691 Central tasks of the management company included the recruitment of study sites and patients, the development  
37  
38 692 of the IT infrastructure including the documentation, communication and invoicing software as well as the  
39  
40 693 processing of all payments.

41 694 The manufacturers Kinetic Concepts Incorporated (KCI) (Acelity) and smith & nephew provided the NPWT  
42  
43 695 devices as well as support and training for the investigators and financed the study.

44  
45 696 The Private University of Witten/Herdecke gGmbH acted as the Sponsor of the trial and the Institute for Research  
46  
47 697 in Operative Medicine with its former director Prof. E.A.M. Neugebauer, the current interim head Prof. Rolf  
48  
49 698 Lefering and the head of the division for clinical research Dörthe Seidel was responsible for the scientific  
50  
51 699 conception, the evaluation as well as the reporting and publication of the study. Prof. Dr. Rolf Lefering was  
52  
53 700 responsible for the statistical planning and analysis. PD Dr. Peter Krüger was responsible for the data management  
54  
55 701 of the study. Special thanks are going to Stefan Bauer, who supported the data management as well as the statistical  
56  
57 702 analysis and reporting.

58 703 We would like to thank Sophie Thorn, who checked the article as a native English speaker with regard to spelling  
59  
60 704 and grammar.

705 **List of figures:**

706 Figure 1: Trial profile (CONSORT)

707 Figure 2: Time until complete, sustained and verified wound closure in the ITT population

708 Figure 3: Time until complete, sustained and verified wound closure for the subgroup of big wounds

709 Figure 4: Time until complete, sustained and verified wound closure for the subgroup of small wounds

710 Figure 5: Time until complete, sustained and verified wound closure in the PP population

711

712 **References**

- 713 1. World Health Organization, *Global report on diabetes*. 2016, WHO:  
714 <http://www.who.int/diabetes/global-report/en/>.
- 715 2. International Diabetes Federation, *IDF Diabetes Atlas*. 2015, IDF: [www.diabetesatlas.org](http://www.diabetesatlas.org).
- 716 3. Yazdanpanah, L., M. Nasiri, and S. Adarvishi, *Literature review on the management of*  
717 *diabetic foot ulcer*. *World J Diabetes*, 2015. **6**(1): p. 37-53.
- 718 4. Leone, S., et al., [*Epidemiology of diabetic foot*]. *Infez Med*, 2012. **20 Suppl 1**: p. 8-13.
- 719 5. Wu, L., et al., *Dressings for treating foot ulcers in people with diabetes: an overview of*  
720 *systematic reviews*. *Cochrane Database Syst Rev*, 2015(7): p. CD010471.
- 721 6. Norman, G., et al., *Dressings and topical agents for treating venous leg ulcers*. *Cochrane*  
722 *Database Syst Rev*, 2018. **6**: p. CD012583.
- 723 7. Wu, S.C., W. Marston, and D.G. Armstrong, *Wound care: the role of advanced wound-healing*  
724 *technologies*. *J Am Podiatr Med Assoc*, 2010. **100**(5): p. 385-94.
- 725 8. Fleischmann, W., et al., [*Vacuum sealing as treatment of soft tissue damage in open*  
726 *fractures*]. *Unfallchirurg*, 1993. **96**(9): p. 488-92.
- 727 9. Argenta, L.C. and M.J. Morykwas, *Vacuum-assisted closure: a new method for wound control*  
728 *and treatment: clinical experience*. *Ann Plast Surg*, 1997. **38**(6): p. 563-76; discussion 577.
- 729 10. Morykwas, M.J., et al., *Vacuum-assisted closure: a new method for wound control and*  
730 *treatment: animal studies and basic foundation*. *Ann Plast Surg*, 1997. **38**(6): p. 553-62.
- 731 11. Morykwas, M.J., et al., *Effects of varying levels of subatmospheric pressure on the rate of*  
732 *granulation tissue formation in experimental wounds in swine*. *Ann Plast Surg*, 2001. **47**(5): p.  
733 547-51.
- 734 12. Gregor, S., et al., *Negative pressure wound therapy: a vacuum of evidence?* *Arch Surg*, 2008.  
735 **143**(2): p. 189-96.
- 736 13. Peinemann, F. and S. Sauerland, *Negative-pressure wound therapy: systematic review of*  
737 *randomized controlled trials*. *Dtsch Arztebl Int*, 2011. **108**(22): p. 381-9.
- 738 14. Ubbink Dirk, T., et al. *Topical negative pressure for treating chronic wounds*. *Cochrane*  
739 *Database of Systematic Reviews*, 2008. DOI: 10.1002/14651858.CD001898.pub2.
- 740 15. Vikatmaa, P., et al., *Negative pressure wound therapy: a systematic review on effectiveness*  
741 *and safety*. *Eur J Vasc Endovasc Surg*, 2008. **36**(4): p. 438-48.
- 742 16. Armstrong, D.G. and L.A. Lavery, *Negative pressure wound therapy after partial diabetic foot*  
743 *amputation: a multicentre, randomised controlled trial*. *Lancet*, 2005. **366**(9498): p. 1704-10.
- 744 17. Blume, P.A., et al., *Comparison of negative pressure wound therapy using vacuum-assisted*  
745 *closure with advanced moist wound therapy in the treatment of diabetic foot ulcers: a*  
746 *multicenter randomized controlled trial*. *Diabetes Care*, 2008. **31**(4): p. 631-6.
- 747 18. Dumville, J.C., et al., *Negative pressure wound therapy for treating foot wounds in people*  
748 *with diabetes mellitus*. *Cochrane Database Syst Rev*, 2013(10): p. CD010318.
- 749 19. Rhee, S.M., et al., *Negative Pressure Wound Therapy Technologies for Chronic Wound Care in*  
750 *the Home Setting*. 2014, Johns Hopkins University Evidence-based Practice Center: Rockville  
751 (MD).

- 1  
2  
3 752 20. Canadian Agency for Drugs and Technologies in Health, *Negative Pressure Wound Therapy*  
4 753 *for Managing Diabetic Foot Ulcers: A Review of the Clinical Effectiveness, Cost-effectiveness,*  
5 754 *and Guidelines*. 2014: Ottawa (ON).  
6 755 21. Liu, S., et al., *Evaluation of negative-pressure wound therapy for patients with diabetic foot*  
7 756 *ulcers: systematic review and meta-analysis*. Ther Clin Risk Manag, 2017. **13**: p. 533-544.  
8 757 22. Liu, Z., et al., *Negative pressure wound therapy for treating foot wounds in people with*  
9 758 *diabetes mellitus*. Cochrane Database Syst Rev, 2018. **10**: p. CD010318.  
10 759 23. Seidel, D., et al., *Negative pressure wound therapy versus standard wound care in chronic*  
11 760 *diabetic foot wounds: study protocol for a randomized controlled trial*. Trials, 2014. **15**: p.  
12 761 334.  
13 762 24. Ärztliches Zentrum für Qualität in der Medizin (Gemeinsame Einrichtung von  
14 763 Bundesärztekammer und Kassenärztlicher Bundesvereinigung) im Auftrag von BÄK, K.,  
15 764 AWMF, *Nationale VersorgungsLeitlinie (NVL) Typ-2-Diabetes Präventions- und*  
16 765 *Behandlungsstrategien für Fußkomplikationen*. 2010, Bundesärztekammer (BÄK)  
17 766 Arbeitsgemeinschaft der Deutschen Ärztekammern <http://www.baek.de>; Kassenärztliche  
18 767 Bundesvereinigung (KBV); <http://www.kbv.de>; Arbeitsgemeinschaft der Wissenschaftlichen  
19 768 Medizinischen Fachgesellschaften (AWMF) <http://www.awmf-online.de>: Berlin, Germany.  
20 769 25. Bauer, H., et al. *Typ-2-Diabetes: Präventions- und Behandlungsstrategien für*  
21 770 *Fußkomplikationen*. Nationale Versorgungs Leitlinien, 2010.  
22 771 26. Ruttermann, M., et al., *Local treatment of chronic wounds: in patients with peripheral*  
23 772 *vascular disease, chronic venous insufficiency, and diabetes*. Dtsch Arztebl Int, 2013. **110**(3):  
24 773 p. 25-31.  
25 774 27. Dupont, W.D. and W.D. Plummer, Jr., *Power and sample size calculations. A review and*  
26 775 *computer program*. Control Clin Trials, 1990. **11**(2): p. 116-28.  
27 776 28. Schaper, N.C., *Diabetic foot ulcer classification system for research purposes: a progress*  
28 777 *report on criteria for including patients in research studies*. Diabetes Metab Res Rev, 2004. **20**  
29 778 **Suppl 1**: p. S90-5.  
30 779 29. Sanders LJ and Frykberg RG, *Diabetic neuropathic osteoarthropathy: the Charcot foot.*, in *The*  
31 780 *high risk foot in diabetes mellitus.*, F. RG, Editor. 1991, Churchill Livingstone: New York. p.  
32 781 297-338.  
33 782 30. Levin, M.E., *Preventing amputation in the patient with diabetes*. Diabetes Care, 1995. **18**(10):  
34 783 p. 1383-94.  
35 784 31. Wagner, F.W., Jr., *The diabetic foot*. Orthopedics, 1987. **10**(1): p. 163-72.  
36 785 32. Rutherford, R.B., et al., *Recommended standards for reports dealing with lower extremity*  
37 786 *ischemia: revised version*. J Vasc Surg, 1997. **26**(3): p. 517-38.  
38 787 33. Widmer, L.K., et al., *[Venous diseases in 1800 employees. Basel Studies II]*. Schweiz Med  
39 788 Wochenschr, 1967. **97**(4): p. 107-10.  
40  
41  
42  
43  
44  
45 789  
46  
47  
48  
49  
50  
51  
52  
53  
54  
55  
56  
57  
58  
59  
60

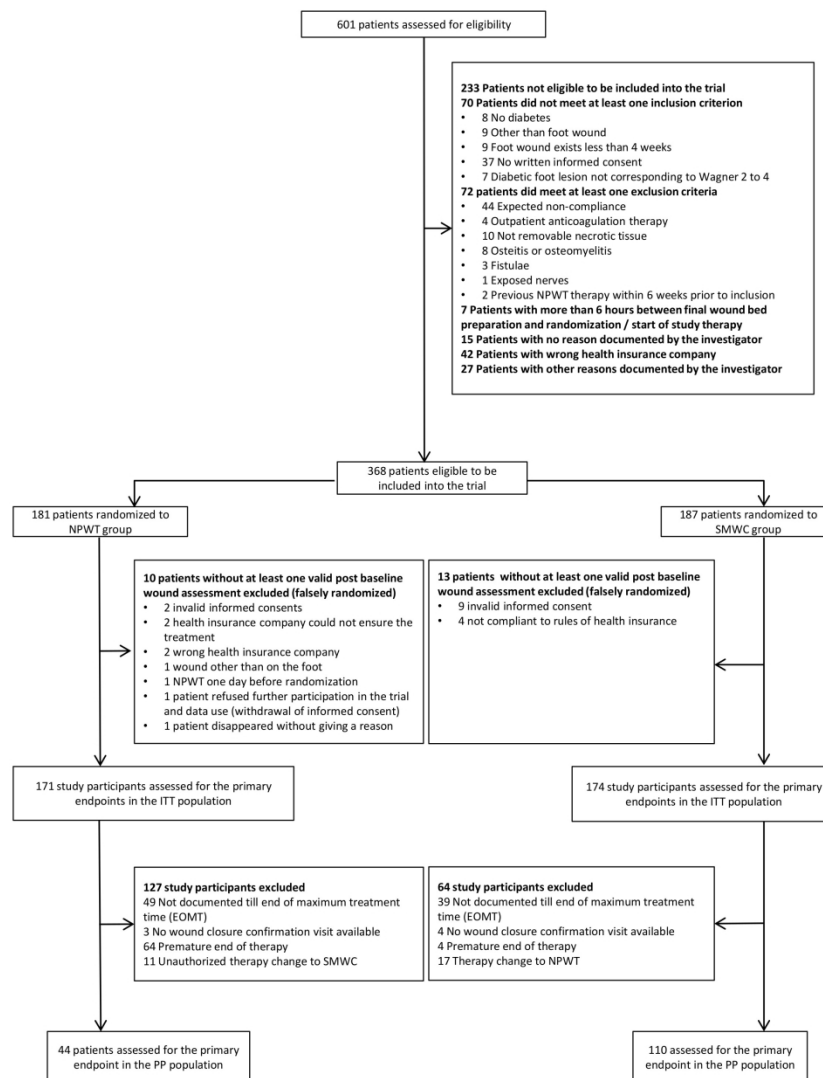

Figure 1: Trial profile (CONSORT)

190x275mm (300 x 300 DPI)



Figure 2: Time until complete, sustained and verified wound closure in the ITT population

189x198mm (300 x 300 DPI)

1  
2  
3  
4  
5  
6  
7  
8  
9  
10  
11  
12  
13  
14  
15  
16  
17  
18  
19  
20  
21  
22  
23  
24  
25  
26  
27  
28  
29  
30  
31  
32  
33  
34  
35  
36  
37  
38  
39  
40  
41  
42  
43  
44  
45  
46  
47  
48  
49  
50  
51  
52  
53  
54  
55  
56  
57  
58  
59  
60

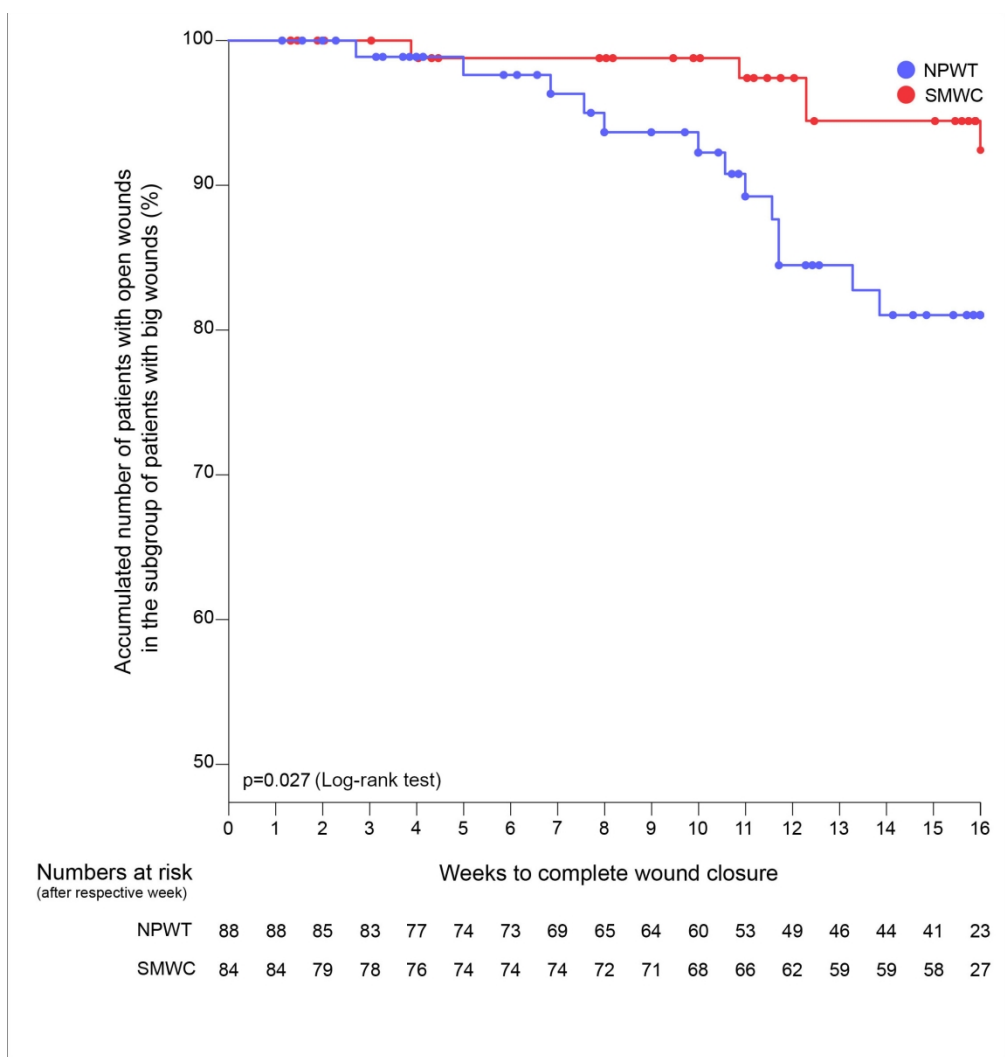

Figure 3: Time until complete, sustained and verified wound closure for the subgroup of big wounds

189x198mm (300 x 300 DPI)



Figure 4: Time until complete, sustained and verified wound closure for the subgroup of small wounds

189x198mm (300 x 300 DPI)



1  
2  
3  
4  
5  
6  
7  
8  
9  
10  
11  
12  
13  
14  
15  
16  
17  
18  
19  
20  
21  
22  
23  
24  
25  
26  
27  
28  
29  
30  
31  
32  
33  
34  
35  
36  
37  
38  
39  
40  
41  
42  
43  
44  
45  
46  
47  
48  
49  
50  
51  
52  
53  
54  
55  
56  
57  
58  
59  
60



Figure 5: Time until complete, sustained and verified wound closure in the PP-population  
189x198mm (300 x 300 DPI)

## Supplement

| Baseline parameters of the ITT population         |              | Total<br>N=345 (100 %) | NPWT<br>N=171 (49.6%) | SMWC<br>N=174 (50.4%) |
|---------------------------------------------------|--------------|------------------------|-----------------------|-----------------------|
| Alcohol                                           | Occasionally | 157 of 341 (46%)       | 83 of 169 (48.5%)     | 74 of 172 (42.3%)     |
|                                                   | Chronic      | 10 of 341 (2.9%)       | 3 of 169 (1.8%)       | 7 of 172 (4.0%)       |
|                                                   | No           | 174 of 341(51%)        | 83 of 171 (48.5%)     | 91 of 174 (52%)       |
| Smoking                                           |              | 293 of 342 (85.7%)     | 144 of 169 (84.3%)    | 149 of 173 (85.1%)    |
| Number of years Mean (SD)                         |              | 34.8 (13.5)            | 36.5 (14.9)           | 33.1 (12.1)           |
| Packs / day Mean                                  |              | 1.1                    | 1.1                   | 1.2                   |
| Drugs                                             | Occasionally | 1 of 341 (0.3%)        | 1 of 169 (0.6%)       | 0 of 172 (0%)         |
|                                                   | Chronic      | 2 of 341 (0.6%)        | 0 of 169 (0%)         | 2 of 172 (1.1%)       |
|                                                   | No           | 338 of 341 (97.7%)     | 168 of 169 (98.2%)    | 170 of 172 (97.1%)    |
| Allergies                                         |              | 37 of 343 (10.7%)      | 16 of 170 (9.4%)      | 21 of 173 (12.0%)     |
| Subjective assessment of nutritional condition    |              |                        |                       |                       |
| Well-nourished                                    |              | 325 of 342 (94.2%)     | 162 of 169 (94.7%)    | 163 of 173 (93.7%)    |
| Moderately malnourished or suspected malnutrition |              | 11 of 342 (3.2%)       | 4 of 169 (2.3%)       | 7 of 173 (4%)         |
| Malnourished                                      |              | 0 of 342 (0%)          | 0 of 169 (0%)         | 0 of 173 (0%)         |

Supplement Table 1: Supplementary baseline characteristics of the Intention To Treat (ITT) population

The table shows baseline parameters of the ITT population. Data are Number (N) and Percentage (%), Mean or Mean and Standard Deviation (SD).

| Wound surface area (mm <sup>2</sup> ) in the ITT population | Calculated from width and length (according to eCRF entry)<br>NPWT<br>N=171 | Results of the photo analysis with the W.H.A.T.<br>NPWT<br>N=171 | Calculated from width and length (according to eCRF entry)<br>SMWC<br>N=174 | Results of the photo analysis with the W.H.A.T.<br>SMWC<br>N=174 |
|-------------------------------------------------------------|-----------------------------------------------------------------------------|------------------------------------------------------------------|-----------------------------------------------------------------------------|------------------------------------------------------------------|
| Randomization                                               | 1060 (1536)<br>550 (1236)<br>N=171 (2)                                      | 687 (879)<br>321 (760)<br>N=118 (10)                             | 1141 (3247)<br>471 (1007)<br>N=174 (0)                                      | 664 (1050)<br>316 (658)<br>N=129 (13)                            |
| Week 1                                                      | 847 (1489)<br>397 (801)<br>N=171 (15)                                       | 643 (820)<br>329 (750)<br>N=118 (32)                             | 1085 (3234)<br>395 (867)<br>N=174 (25)                                      | 713 (1065)<br>307 (749)<br>N=129 (36)                            |

|                |                                       |                                      |                                        |                                       |
|----------------|---------------------------------------|--------------------------------------|----------------------------------------|---------------------------------------|
| <b>Week 3</b>  | 810 (1472)<br>314 (860)<br>N=171 (24) | 590 (742)<br>273 (633)<br>N=118 (28) | 1025 (3242)<br>390 (913)<br>N=174 (22) | 701 (1212)<br>266 (768)<br>N=129 (35) |
| <b>Week 5</b>  | 717 (1379)<br>275 (769)<br>N=171 (37) | 607 (828)<br>231 (843)<br>N=118 (42) | 759 (1466)<br>267 (824)<br>N=174 (41)  | 610 (1119)<br>219 (635)<br>N=129 (38) |
| <b>Week 8</b>  | 636 (1322)<br>220 (712)<br>N=171 (52) | 495 (770)<br>182 (561)<br>N=118 (48) | 674 (1410)<br>186 (783)<br>N=174 (42)  | 501 (937)<br>165 (481)<br>N=129 (42)  |
| <b>Week 12</b> | 549 (858)<br>165 (964)<br>N=171 (110) | 457 (742)<br>134 (494)<br>N=118 (88) | 570 (940)<br>169 (632)<br>N=174 (124)  | 493 (950)<br>133 (498)<br>N=129 (104) |
| <b>Week 16</b> | 440 (810)<br>79 (471)<br>N=171 (80)   | 334 (649)<br>114 (363)<br>N=118 (66) | 493 (1095)<br>69 (415)<br>N=174 (63)   | 351 (750)<br>77 (320)<br>N=129 (56)   |

Supplement Table 2: Wound surface area at each observation time point during the study treatment time of maximum 16 weeks in the ITT population

The table shows the wound surface area at each study visit until the end of maximum study treatment time after 16 weeks calculated data from width and length as documented in the eCRF and for the data derived from the photo analysis with the Wound Healing Analyzing Tool (W.H.A.T.) in the ITT population. An elliptical wound surface area has been calculated from the documented width and length (eCRF)  $[(\pi / 4) \times \text{length} \times \text{width} = \text{area}]$ . Data show Mean and Standard Deviation (SD) and Median and Inter Quartile Range (IQR) as well the Number (N) of values available for analysis and the number of values substituted by the last observation carried forward (LOCF) method (in brackets).

| <b>Wound volume (mm<sup>3</sup>) in the ITT population</b> | <b>NPWT<br/>N=171</b>                      | <b>SMWC<br/>N=174</b>                       |
|------------------------------------------------------------|--------------------------------------------|---------------------------------------------|
| <b>Randomization</b>                                       | 22498 (58930)<br>4710 (15048)<br>N=171 (2) | 21740 (74181)<br>4759 (12888)<br>N=174 (0)  |
| <b>Week 1</b>                                              | 13203 (28709)<br>2487 (6908)<br>N=171 (15) | 19979 (73143)<br>3533 (11407)<br>N=174 (26) |
| <b>Week 3</b>                                              | 10708 (28521)<br>1884 (6857)<br>N=171 (24) | 16217 (67494)<br>2293 (8831)<br>N=174 (23)  |
| <b>Week 5</b>                                              | 7700 (19719)<br>1166 (5338)                | 11286 (32566)<br>1365 (7539)                |

|                |                                           |                                           |
|----------------|-------------------------------------------|-------------------------------------------|
|                | N=171 (37)                                | N=174 (42)                                |
| <b>Week 8</b>  | 5592 (11535)<br>785 (4604)<br>N=171 (78)  | 8772 (27674)<br>812 (5258)<br>N=174 (67)  |
| <b>Week 12</b> | 5333 (12422)<br>565 (3913)<br>N=171 (119) | 6639 (16454)<br>625 (4083)<br>N=174 (133) |
| <b>Week 16</b> | 3880 (10534)<br>141 (1890)<br>N=171 (83)  | 5465 (14874)<br>200 (1587)<br>N=174 (64)  |

Supplement Table 3: Wound volume at each observation time point during the study treatment time of maximum 16 weeks in the ITT population

The table shows the wound volume at each study visit until the end of the maximum study treatment time of 16 weeks in the ITT population. Wound volume was calculated from width, length and depth as documented in the eCRF. Data show Mean and Standard Deviation (SD) and Median and Inter Quartile Range (IQR) as well the number (N) of values available for analysis and the number of values substituted by the last observation carried forward (LOCF) method (in brackets).

| Wound tissue composition in the ITT population | NPWT Granulation<br>N=171 |          | NPWT Fibrin<br>N=171 |          | NPWT Necrosis<br>N=171 |          | SMWC Granulation<br>N=174 |           | SMWC Fibrin<br>N=174 |          | SMWC Necrosis<br>N=174 |          |
|------------------------------------------------|---------------------------|----------|----------------------|----------|------------------------|----------|---------------------------|-----------|----------------------|----------|------------------------|----------|
|                                                | eCRF                      | W.H.A.T. | eCRF                 | W.H.A.T. | eCRF                   | W.H.A.T. | eCRF                      | W.H.A.T.  | eCRF                 | W.H.A.T. | eCRF                   | W.H.A.T. |
| Randomization                                  | 34 (36)                   | 22 (25)  | 21 (28)              | 71 (27)  | 3 (10)                 | 7 (15)   | 34 (37)                   | 24 (26)   | 22 (29)              | 69 (28)  | 2 (9)                  | 7 (14)   |
|                                                | 20 (70)                   | 12 (37)  | 10 (30)              | 79 (46)  | 0 (0)                  | 0 (5)    | 20 (71)                   | 14 (39)   | 10 (40)              | 79 (44)  | 0 (0)                  | 0 (8)    |
|                                                | 171 (2)                   | 118 (8)  | 170 (4)              | 118 (8)  | 169 (5)                | 118 (8)  | 174 (3)                   | 129 (12)  | 174 (1)              | 129 (12) | 172 (2)                | 129 (12) |
| Week 1                                         | 58 (35)                   | 21 (25)  | 19 (22)              | 73 (27)  | 5 (13)                 | 6 (12)   | 49 (35)                   | 21 (25)   | 24 (27)              | 74 (26)  | 6 (15)                 | 5 (9)    |
|                                                | 70 (70)                   | 10 (36)  | 10 (30)              | 81 (47)  | 0 (2)                  | 0 (5)    | 50 (70)                   | 10 (36)   | 15 (31)              | 85 (40)  | 0 (5)                  | 0 (5)    |
|                                                | 171 (16)                  | 118 (32) | 71 (19)              | 118 (32) | 169 (23)               | 118 (32) | 174 (28)                  | 129 (36)  | 174 (27)             | 129 (36) | 172 (30)               | 129 (36) |
| Week 3                                         | 67 (31)                   | 16 (23)  | 18 (22)              | 80 (25)  | 5 (13)                 | 4 (11)   | 57 (32)                   | 21 (25)   | 25 (26)              | 77 (25)  | 5 (13)                 | 3 (7)    |
|                                                | 80 (55)                   | 5 (25)   | 10 (30)              | 91 (30)  | 0 (0)                  | 0 (1)    | 60 (60)                   | 10 (36)   | 20 (35)              | 85 (36)  | 0 (3)                  | 0 (1)    |
|                                                | 171 (26)                  | 118 (27) | 171 (30)             | 118 (27) | 169 (28)               | 118 (27) | 174 (24)                  | 129 (35)  | 174 (25)             | 129 (35) | 172 (30)               | 129 (35) |
| Week 5                                         | 70 (30)                   | 15 (22)  | 18 (24)              | 83 (22)  | 4 (13)                 | 2 (8)    | 62 (31)                   | 18 (26)   | 23 (25)              | 80 (26)  | 4 (12)                 | 3 (10)   |
|                                                | 80 (45)                   | 6 (21)   | 10 (25)              | 91 (26)  | 0 (0)                  | 0 (1)    | 63 (50)                   | 4 (32)    | 10 (39)              | 93 834   | 0 (0)                  | 0 (0)    |
|                                                | 171 (36)                  | 118 (43) | 171 (38)             | 118 (43) | 169 (42)               | 118 (43) | 174 (44)                  | 129 (36)  | 174 (47)             | 129 (36) | 172 (46)               | 129 (36) |
| Week 8                                         | 74 (30)                   | 16 (23)  | 17 (24)              | 82 (24)  | 4 (13)                 | 2 (6)    | 70 (29)                   | 17 (24)   | 17 (21)              | 80 (25)  | 5 (13)                 | 3 (11)   |
|                                                | 90 (40)                   | 4 (27)   | 10 (20)              | 93 (33)  | 0 (0)                  | 0 (0)    | 80 (40)                   | 3 (33)    | 10 (20)              | 92 (36)  | 0 (0)                  | 0 (0)    |
|                                                | 171 (53)                  | 118 (48) | 171 (56)             | 118 (48) | 171 (59)               | 118 (48) | 174 (44)                  | 129 (43)  | 174 (49)             | 129 (43) | 174 (52)               | 129 (43) |
| Week 12                                        | 75 (30)                   | 15 (23)  | 17 (25)              | 83 (24)  | 4 (13)                 | 1 (5)    | 73 (29)                   | 16 (23)   | 16 (20)              | 82 (23)  | 5 (13)                 | 2 (6)    |
|                                                | 90 (40)                   | 4 (22)   | 5 (20)               | 96 (23)  | 0 (0)                  | 0 (0)    | 80 (38)                   | 3 (29)    | 10 (20)              | 93 (32)  | 0 (0)                  | 0 (0)    |
|                                                | 171(115)                  | 118 (89) | 171(118)             | 118 (89) | 171(119)               | 118 (89) | 174(124)                  | 129(102)  | 174(125)             | 129(102) | 172(126)               | 129(102) |
| Week 16                                        | 77 (30)                   | 13 (22)  | 14 (22)              | 86 (24)  | 3 (10)                 | 1 (6)    | 76 (30)                   | 17 (24)   | 15 (24)              | 81 (24)  | 3 (13)                 | 2 (6)    |
|                                                | 90 (40)                   | 1 (17)   | 2 (20)               | 98 (19)  | 0 (0)                  | 0 (0)    | 90 (40)                   | 4 (31)    | 5 (20)               | 93 (35)  | 0 (0)                  | 0 (0)    |
|                                                | 171 (78)                  | 118 (66) | 171 (79)             | 118 (66) | 171 (82)               | 118 (66) | 174 (62)                  | 129 (576) | 174 (65)             | 129 (56) | 174 (66)               | 129 (56) |

Supplement Table 4: Wound tissue composition at each observation time point during the study treatment time of maximum 16 weeks in the ITT population.

Wound tissue composition (granulation, fibrin, and necrosis) is presented for the data documented in the eCRF and for the data derived from the photo analysis using the Wound Healing Analyzing Tool (W.H.A.T.). Data show Mean and Standard Deviation (SD) and Median and Inter Quartile Range (IQR) as well the number (N) of values analyzed for the ITT population and the number (N) of values substituted by the last observation carried forward (LOCF) method (in brackets).

| <b>Pain<br/>in the ITT population</b> | <b>Total<br/>N=345</b>            | <b>NPWT<br/>N=171</b>            | <b>SMWC<br/>N=174</b>            |
|---------------------------------------|-----------------------------------|----------------------------------|----------------------------------|
| <b>Screening</b>                      | 2.1 (2.4)<br>1 (4)<br>N=344 (0)   | 2.1 (2.3)<br>1 (4)<br>N=171 (0)  | 2.1 (2.4)<br>1 (4)<br>N=173 (0)  |
| <b>Week 1</b>                         | 1.7 (2.2)<br>1 (3)<br>N=344 (6)   | 1.6 (2.2)<br>0 (2)<br>N=171 (1)  | 1.8 (2.2)<br>1 (3)<br>N=173 (5)  |
| <b>Week 3</b>                         | 1.5 (2.0)<br>1 (2)<br>N=344 (27)  | 1.3 (1.9)<br>0 (2)<br>N=171 (11) | 1.7 (2.1)<br>1 (3)<br>N=173 (16) |
| <b>Week 5</b>                         | 1.3 (1.9)<br>0 (2)<br>N=344 (45)  | 1.2 (1.9)<br>0 (2)<br>N=171 (21) | 1.4 (2.0)<br>0 (2)<br>N=173 (24) |
| <b>Week 8</b>                         | 1.3 (1.9)<br>0 (2)<br>N=344 (70)  | 1.2 (1.9)<br>0 (2)<br>N=171 (38) | 1.3 (1.9)<br>0 (2)<br>N=173 (32) |
| <b>Week 12</b>                        | 1.1 (1.8)<br>0 (2)<br>N=344 (115) | 1.2 (1.9)<br>0 (2)<br>N=171 (64) | 1.1 (1.8)<br>0 (2)<br>N=173 (51) |
| <b>Week 16</b>                        | 1.0 (1.7)<br>0 (1)<br>N=344 (129) | 1.0 (1.7)<br>0 (2)<br>N=171 (76) | 0.9 (1.7)<br>0 (1)<br>N=173 (53) |

Supplement Table 5: Pain in the course of the study treatment time of maximum 16 weeks in the ITT population

The table shows the results of the pain evaluation at the pre-defined observation time points during the active study treatment time of 16 weeks in the ITT population. Data show Mean and Standard Deviation (SD) and Median and Inter Quartile Range (IQR) as well the Number (N) of values analyzed for the ITT population and the number (N) of values substituted by the last observation carried forward (LOCF) method (in brackets).

| <b>Quality of Life (EQ5D)<br/>in the ITT population</b> | <b>Total<br/>N=345</b>                  | <b>NPWT<br/>N=171</b>                  | <b>SMWC<br/>N=174</b>                   |
|---------------------------------------------------------|-----------------------------------------|----------------------------------------|-----------------------------------------|
| <b>Screening</b>                                        | 0.53 (0.25)<br>0.53 (0.18)<br>N=317 (5) | 0.53 (0.27)<br>0.53 (0.2)<br>N=156 (2) | 0.53 (0.24)<br>0.53 (0.18)<br>N=159 (3) |

|                                            |                                         |                                        |                                        |
|--------------------------------------------|-----------------------------------------|----------------------------------------|----------------------------------------|
| <b>End of therapy</b>                      | 0.68 (0.23)<br>0.76 (0.34)<br>N=75 (2)  | 0.67 (0.24)<br>0.77 (0.29)<br>N=62 (2) | 0.72 (0.17)<br>0.66 (0.35)<br>N=13 (0) |
| <b>End of maximum study treatment time</b> | 0.63 (0.24)<br>0.63 (0.28)<br>N=158 (4) | 0.66 (0.22)<br>0.66 (0.28)<br>N=63 (2) | 0.61 (0.25)<br>0.63 (0.24)<br>N=95 (2) |
| <b>Follow up after 6 months</b>            | 0.68 (0.24)<br>0.71 (0.39)<br>N=190 (5) | 0.69 (0.26)<br>0.77 (0.35)<br>N=93 (3) | 0.67 (0.23)<br>0.63 (0.39)<br>N=97 (2) |

Supplement Table 6: Quality of life (EQ5D) in the course of the study treatment time of 16 week in the ITT-population  
Quality of life evaluated with the EQ5D instrument at the pre-defined observation time points during the active study treatment time of 16 weeks in the ITT population. Data show Mean and Standard Deviation (SD) and Median and Inter Quartile Range (IQR) as well the Number (N) of values analyzed for the ITT population and the Number (N) of values substituted by the last observation carried forward (LOCF) method (in brackets).

| <b>Results for the subgroup of small wounds</b>                                                                                   | <b>Total<br/>N=173 of 345</b> | <b>NPWT N=83<br/>of 171</b> | <b>SMWC<br/>N=90 of 174</b> | <b>Difference<br/>[95%CI]<br/>P</b> |
|-----------------------------------------------------------------------------------------------------------------------------------|-------------------------------|-----------------------------|-----------------------------|-------------------------------------|
| <b>Wound closure rate within 16 weeks</b>                                                                                         |                               |                             |                             |                                     |
| N                                                                                                                                 | 28 of 173                     | 12 of 83                    | 16 of 90                    | 4                                   |
| %                                                                                                                                 | 16.2%                         | 14.5%                       | 17.8%                       | 3.3%                                |
| [95%CI]                                                                                                                           | [10.7 – 21.7]%                | [6.9 – 22.0]                | [9.9 – 25.7]                | [-7.6 - 14.2]                       |
|                                                                                                                                   |                               |                             |                             | 0.6 (U)                             |
| <b>Time until optimal preparation of the wound bed (min 95 % granulation tissue) within 16 weeks N<sub>available values</sub></b> | 100                           | 52                          | 48                          |                                     |
| <b>Mean (SD)</b>                                                                                                                  | 38.6 (37.4)                   | 28.5 (30.0)                 | 49.5 (41.6)                 | 21.0 (11.0)                         |
| <b>Median (IQR)</b>                                                                                                               | 26.5 (50.0)                   | 20.0 (28.0)                 | 48.0 (79.0)                 | [6.9 – 35.1]                        |
| <b>Min-Max</b>                                                                                                                    | 0-114                         | 0-113                       | 0-114                       |                                     |
|                                                                                                                                   |                               |                             |                             | 0.005*                              |
| <b>No. of study participants with amputations or resections within 16 weeks N</b>                                                 | 35 of 173                     | 19 of 83                    | 16 of 90                    | 3                                   |
| %                                                                                                                                 | 20.2%                         | 22.9%                       | 17.8%                       | 5.1%                                |
| [95%CI]                                                                                                                           | [14.2 - 26.2]                 | [13.9 - 31.9]               | [9.9 - 25.7]                | [-6.9 – 17.1]                       |
|                                                                                                                                   |                               |                             |                             | 0.45 (F)                            |

|                                                                     |               |                |                 |                           |
|---------------------------------------------------------------------|---------------|----------------|-----------------|---------------------------|
| <b>No. of performed amputations and resections N</b>                | 50            | 22             | 28              | 6                         |
| <b>No. of patients with minor amputations within 16 weeks N (%)</b> | 35 (20.2%)    | 19 (22.9%)     | 16 (17.8%)      | 3 (5.1%)<br>0.45 (F)      |
| <b>No. of patients with major amputations within 16 weeks N (%)</b> | 0 (0%)        | 0 (0%)         | 0 (0%)          | 0 (0%)<br>-               |
| <b>Wound closure rate at follow up after 6 months N</b>             | 37 von 173    | 13 of 83       | 24 of 90        | 11                        |
| <b>%</b>                                                            | 21,4%         | 15.7%          | 26.7%           | 11%                       |
| <b>[95%CI]</b>                                                      | [15.3 – 27.5] | [7.8 – 23.5] . | [17.5 – 35.8] . | [-1.0 - 23.0]<br>0.10 (U) |

Supplement Table 7: Results for the subgroup of small wounds

The table shows the wound closure rate, time until optimal preparation of the wound bed (min. 95% granulation), and amputations and resections within the maximum study treatment time of 16 weeks and wound closure rate within the study observation time of 6 months for the subgroup of small wounds. Data show the Number (N) of study participants and the Percentage (%), Mean and Standard Deviation (SD); Median and Inter Quartile Range (IQR); and Minimum (Min) and Maximum (Max). F=Fisher Exact Test; U=Man Whitney U-Test; \*Student's t-test

| <b>Results for the subgroup of large wounds</b>                                                                                          | <b>Total</b>          | <b>NPWT</b>           | <b>SMWC</b>            | <b>Difference</b>                 |
|------------------------------------------------------------------------------------------------------------------------------------------|-----------------------|-----------------------|------------------------|-----------------------------------|
|                                                                                                                                          | <b>172 of 345</b>     | <b>N=88 of 171</b>    | <b>N=84 of 174</b>     | <b>[95%CI]</b>                    |
|                                                                                                                                          |                       |                       |                        | <b>p</b>                          |
| <b>Wound closure rate within 16 weeks N</b>                                                                                              |                       |                       |                        |                                   |
| <b>%</b>                                                                                                                                 | 18 of 172             | 13 of 88              | 5 of 84                | 8                                 |
| <b>[95%CI]</b>                                                                                                                           | 10,5%<br>[5.9 – 15.0] | 14.8%<br>[7.4 – 22,2] | 6.0%<br>[0.9 – 11.0] . | 8.8%<br>[-0.2 - 17.8]<br>0.08 (U) |
| <b>Time until optimal preparation of the wound bed (min 95 % granulation tissue) within 16 weeks (days) N<sub>available values</sub></b> | 80                    | 47                    | 33                     |                                   |
| <b>Mean (SD)</b>                                                                                                                         | 47.8 (40.8)           | 43.4 (37.9)           | 54.0 (44.6)            | 10.6 (6.7)                        |
| <b>Median (IQR)</b>                                                                                                                      | 36.5 (70.0)           | 35.0 (61.0)           | 56.0 (105.0)           | [-7.6 – 28.8]                     |
| <b>Min-Max</b>                                                                                                                           | 0 - 127               | 0 - 127               | 0 -115                 | 0.27*                             |



|                                                                       |                 |               |               |               |
|-----------------------------------------------------------------------|-----------------|---------------|---------------|---------------|
| <b>No. of patients with amputations or resections within 16 weeks</b> |                 |               |               |               |
| <b>N</b>                                                              | 36 of 172       | 16 of 88      | 20 of 84      | 4             |
| <b>%</b>                                                              | 20.9            | 18.2%         | 23.8%         | 5.6%          |
| <b>[95%CI]</b>                                                        | [14.9 – 27.0] % | [10.1 – 26.2] | [14.7 – 32.9] | [-6.6 – 17.8] |
|                                                                       |                 |               |               | 0.45 (F)      |
| <b>No. of performed amputations and resections N</b>                  | 52              | 23            | 29            | 6             |
|                                                                       |                 |               |               | 0.41 (U)      |
| <b>No. of patients with minor amputations N (%)</b>                   | 34 (19.8%)      | 14 (15.9%)    | 20 (23.8%)    | 0.25 (F)      |
| <b>No. of patients with major amputations N (%)</b>                   | 2 (1.2%)        | 2 (2.3%)      | 0 (0%)        | 0.50 (F)      |
| <b>Wound closure rate at follow up after 6 months N</b>               | 23 of 172       | 11 of 88      | 12 of 84      | 1             |
| <b>%</b>                                                              | 13.4%           | 12.5%         | 14.3%         | -1.8%         |
| <b>[95%CI]</b>                                                        | [8.3 – 18.5]    | [5.6 – 19.4]  | [6.8 – 21.8]  | [-12.0 – 8.4] |
|                                                                       |                 |               |               | 0.82 (U)      |

Supplement Table 8: Results for the subgroup of large wounds

The table shows the wound closure rate, time until optimal preparation of the wound bed (min. 95% granulation), and amputations and resections within the maximum study treatment time of 16 weeks and the wound closure rate within the study observation time of 6 months for large wounds. Data show the Number (N) of study participants the Percentage (%), Mean and Standard Deviation (SD); Median and Inter Quartile Range (IQR); and Minimum (Min) and Maximum (Max). F=Fisher Exact Test; U=Man Whitney U-Test; \*Student's t-test

| <b>Demographic and baseline parameters of the PP Population</b> | <b>Total<br/>N=154<br/>(100%)</b> | <b>NPWT<br/>N=44<br/>(28.6%)</b> | <b>SMWC<br/>N=110<br/>(71.4%)</b> |
|-----------------------------------------------------------------|-----------------------------------|----------------------------------|-----------------------------------|
| <b>Male</b>                                                     | 113 of 154 (73.4%)                | 29 of 44 (65.9%)                 | 84 of 110 (76.4%)                 |
| <b>Female</b>                                                   | 41 of 154 (26.6%)                 | 15 of 44 (34.1%)                 | 26 of 110 (23.6%)                 |
| <b>Age in years</b>                                             | N=154                             | N=44                             | N=110                             |
| <b>Mean (SD)</b>                                                | 67.4 (10.6)                       | 66.5 (11.0)                      | 67.8 (10.4)                       |
| <b>Height in cm</b>                                             | N=153                             | N=43                             | N=110                             |
| <b>Mean (SD)</b>                                                | 173.8 (12.9)                      | 173.5 (17.4)                     | 174.0 (10.7)                      |
| <b>Weight in kg</b>                                             | N=150                             | N=42                             | N=108                             |
| <b>Mean (SD)</b>                                                | 95.4 (23.3)                       | 96.2 (21.6)                      | 95.1 (24.0)                       |

|                                                          |                    |                  |                   |
|----------------------------------------------------------|--------------------|------------------|-------------------|
| <b>Alcohol</b>                                           | N=153              | N=44             | N=109             |
| <b>Occasionally</b>                                      | 71 (46.4%)         | 22 (50.0%)       | 49 (45.0%)        |
| <b>Chronic</b>                                           | 3 (2.0%)           | 1 (2.3%)         | 2 (1.8%)          |
| <b>No</b>                                                | 79 (51.6%)         | 21 (47.7%)       | 58 (53.2%)        |
| <b>Smoking</b>                                           | 138 of 154 (89.6%) | 42 of 44 (95.5%) | 96 of 110 (87.3%) |
| <b>Number of years (Mean (SD))</b>                       | 37.0 (9.2)         | 42.0 (2.8)       | 36.3 (9.7)        |
| <b>Packs / day (Mean)</b>                                | 1.0                | 1.0              | 1.0               |
| <b>Drugs</b>                                             | N=153              | N=44             | N=109             |
| <b>Occasionally</b>                                      | 0 (0%)             | 0 (0%)           | 0 (0%)            |
| <b>Chronic</b>                                           | 1 (0.7%)           | 0 (0%)           | 1 (0.9%)          |
| <b>No</b>                                                | 152 (99.3%)        | 44 (100%)        | 108 (99.1%)       |
| <b>Requiring dialysis</b>                                | 11 of 154 (7.1 %)  | 2 of 44 (4.5%)   | 9 of 110 (8.2%)   |
| <b>Allergies</b>                                         | 16 of 154 (10.4%)  | 6 of 44 (13.6%)  | 10 of 110 (9.1%)  |
| <b>Subjective assessment of nutritional condition</b>    | N=150              | N=43             | N=107             |
| <b>Well-nourished</b>                                    | 147 (98.0%)        | 42 (97.7%)       | 105 (98.1%)       |
| <b>Moderately malnourished or suspected malnutrition</b> | 3 (2.0%)           | 1 (2.3%)         | 2 (1.9%)          |
| <b>Malnourished</b>                                      | 0 (0%)             | 0 (0%)           | 0 (0%)            |
| <b>Peripheral arterial occlusive disease (PAOD)</b>      | N=109 (70.8%)      | N=29 (65.9%)     | N=80 (72.7%)      |
| <b>without critical limb ischemia</b>                    | 103 (94.5%)        | 28 (96.6%)       | 75 (93.8%)        |
| <b>with critical limb ischemia</b>                       | 6 (5.5%)           | 1 (3.4%)         | 5 (6.3%)          |
| <b>Revascularisation before study start</b>              | N=9 (5.8%)         | N=1 (2.3%)       | N=8 (7.3%)        |
| <b>Percutaneous transluminal angioplasty (PTA)</b>       | 5 (55.6%)          | 0 (0.0%)         | 5 (62.5%)         |
| <b>PTA + Stent</b>                                       | 0 (0%)             | 0 (0%)           | 0 (0%)            |
| <b>Veins-Bypass</b>                                      | 1 (11.1%)          | 1 (100.0%)       | 0 (11.1%)         |
| <b>Polytetrafluoroethylene (PTFE) Bypass</b>             | 1 (11.1%)          | 0 (0%)           | 1 (12.5%)         |
| <b>Thromboendarterectomy and patch plastic</b>           | 2 (22.2%)          | 0 (0%)           | 2 (25.0%)         |
| <b>Revascularization with influence on the wound</b>     | 9 of 9 (100%)      | 1 of 1 (100%)    | 0 of 8 (100%)     |
| <b>Sufficient revascularization result</b>               | 9 of 9 (100%)      | 1 of 1 (100%)    | 8 of 8 (100%)     |
| <b>Insufficient revascularization result</b>             | 0 of 9 (0%)        | 0 of 1 (0%)      | 0 of 8 (0%)       |
| <b>Revascularization result not assessable</b>           | 0 of 9 (0%)        | 0 of 1 (0%)      | 0 of 8 (0%)       |

Supplement Table 9: Patient demographics and baseline characteristics of the Per Protocol (PP) population

Data are Number (N) and Percentage (%) and Mean and Standard Deviation (SD). "N=" is stating the number of patients with actual available information. Findings, diagnoses and procedures documented by the clinical investigators are presented.

| <b>Time until optimal wound bed preparation (min 95 % granulation tissue)</b> | <b>Total<br/>N=100</b> | <b>NPWT<br/>N=38</b> | <b>SMWC<br/>N=62</b> | <b>Mean difference<br/>[95%CI]<br/>p*</b> |
|-------------------------------------------------------------------------------|------------------------|----------------------|----------------------|-------------------------------------------|
| <b>Mean (SD)</b>                                                              | 43.8 (42.3)            | 23.8 (31.7)          | 56.0 (43.5)          | 32.2                                      |
| <b>Median (IQR)</b>                                                           | 30.0 (76)              | 8.5 (28.0)           | 56.0 (96.0)          | [16.3 – 48.1]                             |
| <b>Min - Max</b>                                                              | 0 - 127                | 0 - 127              | 0 - 115              | <b>&lt;0.001</b>                          |

Supplement Table 10: Time until optimal preparation of the wound for further treatment (minimum 95 % granulation tissue) in the PP population

Data show the number (N) of study participants with available values for the analysis in total and for both treatment arms; Mean and Standard Deviation (SD); Median and Inter Quartile Range (IQR); and Minimum (Min) and Maximum (Max).

\*Student's t-test

| <b>Amputations &amp; Resections in the PP population</b> | <b>Total<br/>N=154</b> | <b>NPWT<br/>N=44</b> | <b>SMWC<br/>N=110</b> | <b>Difference<br/>p</b> |
|----------------------------------------------------------|------------------------|----------------------|-----------------------|-------------------------|
| <b>No. of patients with amputation or resection</b>      | 30 of 154              | 9 of 44              | 21 of 110             | 12                      |
| <b>N (%)</b>                                             | 19.5 %                 | 20.5 %               | 19.1 %                | 1.4%                    |
| <b>[95%CI]</b>                                           | [13,2 – 25,7]          | [8,5 - 32,4]         | [11,7 – 26,4]         | [-12.6 – 15.4]          |
| <b>No. of amputations or resections</b>                  |                        |                      |                       |                         |
| <b>N</b>                                                 | 39                     | 11                   | 28                    | 17                      |
|                                                          |                        |                      |                       | 0.86 (U)                |
| <b>No. of study participants with Minor-Amputations</b>  |                        |                      |                       |                         |
| <b>N (%)</b>                                             | 30 (18.9%)             | 9 (12.8%)            | 21 (21.4%)            | 12                      |
|                                                          |                        |                      |                       | 0.83 (F)                |
| <b>No. of study participants with Major-Amputations</b>  |                        |                      |                       |                         |
| <b>N (%)</b>                                             | 0 (0%)                 | 0 (0%)               | 0 (0%)                | 0 (0%)                  |
|                                                          |                        |                      |                       | -                       |

Supplement Table 11: Amputations and resections in the PP population

Data show the Number (N) of study participants available for the analysis in total and for both treatment arms and the Number (N) and the percentage (%) of study participants with amputations or resections, the number of amputations and

resections performed and the number and the percentage of participants with minor and major amputations. F = Fisher's Exact Test; U = Mann-Whitney U-Test.

| <b>Wound surface area (mm<sup>2</sup>) in the PP population</b> | <b>Calculated from width and length (according to eCRF entry)<br/>NPWT<br/>N=44</b> | <b>Results of the photo analysis with W.H.A.T.<br/>NPWT<br/>N=44</b> | <b>Calculated from width and length (according to eCRF entry)<br/>SMWC<br/>N=44</b> | <b>Results of the photo analysis with W.H.A.T.<br/>SMWC<br/>N=110</b> |
|-----------------------------------------------------------------|-------------------------------------------------------------------------------------|----------------------------------------------------------------------|-------------------------------------------------------------------------------------|-----------------------------------------------------------------------|
| <b>Randomization</b>                                            | 964 (1392)<br>345 (1426)<br>N= 44 (1)                                               | 633 (795)<br>299 (705)<br>N=41 (3)                                   | 878 (1266)<br>373 (889)<br>N= 110 (0)                                               | 669 (1143)<br>294 (692)<br>N=102 (9)                                  |
| <b>Week 1</b>                                                   | 525 (696)<br>224 (408)<br>N= 44 (5)                                                 | 524 (614)<br>318 (561)<br>N=41 (8)                                   | 827 (1238)<br>306 (863)<br>N= 110 (16)                                              | 706 (1138)<br>289 (775)<br>N=102 (27)                                 |
| <b>Week 3</b>                                                   | 428 (635)<br>176 (378)<br>N= 44 (6)                                                 | 477 (737)<br>165 (424)<br>N=41 (9)                                   | 803 (1306)<br>238 (867)<br>N= 110 (7)                                               | 714 (1316)<br>259 (656)<br>N=102 (26)                                 |
| <b>Week 5</b>                                                   | 355 (590)<br>100 (291)<br>N= 44 (8)                                                 | 418 (602)<br>165 (435)<br>N=41 (15)                                  | 650 (1157)<br>161 (670)<br>N= 110 (18)                                              | 607 (1212)<br>167 (545)<br>N=102 (29)                                 |
| <b>Week 8</b>                                                   | 284 (528)<br>53 (217)<br>N= 44 (8)                                                  | 320 (530)<br>83 (264)<br>N=41 (16)                                   | 569 (1072)<br>106 (443)<br>N= 110 (17)                                              | 479 (990)<br>123 (397)<br>N=102 (29)                                  |
| <b>Week 12</b>                                                  | 283 (580)<br>14 (130)<br>N= 44 (24)                                                 | 289 (537)<br>62 (175)<br>N=41 (32)                                   | 528 (1024)<br>79 (419)<br>N= 110 (71)                                               | 474 (1006)<br>111 (407)<br>N=102 (80)                                 |
| <b>Week 16</b>                                                  | 190 (416)<br>0 (95)<br>N= 44 (14)                                                   | 179 (333)<br>30 (204)<br>N=41 (25)                                   | 386 (1124)<br>31 (159)<br>N= 110 (19)                                               | 319 (724)<br>65 (256)<br>N=102 (42)                                   |

Supplement Table 12: Wound surface area at each observation time point during the study treatment time of maximum 16 weeks in the PP population

The table shows the wound surface area at each study visit until the end of maximum study treatment time after 16 weeks calculated data from width and length as documented in the eCRF and for the data derived from the photo analysis with the Wound Healing Analyzing Tool (W.H.A.T.) in the PP population. An elliptical wound surface area has been calculated from the documented width and length (eCRF)  $[(\pi / 4) \times \text{length} \times \text{width} = \text{area}]$ . Data show Mean and Standard Deviation (SD) and Median and Inter Quartile Range (IQR) as well the Number (N) of values available for analysis and the number of values substituted by the last observation carried forward (LOCF) method (in brackets).

| <b>Wound volume (mm<sup>3</sup>) in the PP population</b> | <b>NPWT<br/>N=44</b>                      | <b>SMWC<br/>N=110</b>                      |
|-----------------------------------------------------------|-------------------------------------------|--------------------------------------------|
| <b>Randomization</b>                                      | 33359 (95749)<br>5746 (17330)<br>N=44 (1) | 14742 (36523)<br>3905 (11189)<br>N=110 (0) |
| <b>Week 1</b>                                             | 11606 (26991)<br>1824 (6113)<br>N=44 (5)  | 13525 (34844)<br>2470 (9479)<br>N=110 (16) |
| <b>Week 3</b>                                             | 8636 (24698)<br>777 (3199)<br>N=44 (6)    | 11907 (32047)<br>1864 (8039)<br>N=110 (7)  |
| <b>Week 5</b>                                             | 5480 (13967)<br>271 (1790)<br>N=44 (7)    | 8981 (25570)<br>1027 (4745)<br>N=110 (18)  |
| <b>Week 8</b>                                             | 3955 (9056)<br>192 (809)<br>N=44 (16)     | 6899 (18607)<br>506 (3915)<br>N=110 (29)   |
| <b>Week 12</b>                                            | 6052 (16114)<br>71 (681)<br>N=44 (25)     | 5964 (15930)<br>361 (1890)<br>N=110 (77)   |
| <b>Week 16</b>                                            | 3246 (11245)<br>0 (319)<br>N=44 (15)      | 3396 (10783)<br>57 (609)<br>N=110 (19)     |

Supplement Table 13: Wound volume at each observation time point during the study treatment time of maximum 16 weeks in the PP population

The table shows the wound volume at each study visit until the end of the maximum study treatment time of 16 weeks in the PP population. Wound volume was calculated from width, length and depth as documented in the eCRF. Data show Mean and Standard Deviation (SD) and Median and Inter Quartile Range (IQR) as well the number (N) of values available for analysis and the number of values substituted by the last observation carried forward (LOCF) method (in brackets).

| Wound tissue composition in the PP population | NPWT Granulation<br>N=44 |          | NPWT Fibrin<br>N=44 |          | NPWT Necrosis<br>N=44 |          | SMWC Granulation<br>N=110 |          | SMWC Fibrin<br>N=110 |          | SMWC Necrosis<br>N=110 |          |
|-----------------------------------------------|--------------------------|----------|---------------------|----------|-----------------------|----------|---------------------------|----------|----------------------|----------|------------------------|----------|
|                                               | eCRF                     | W.H.A.T. | eCRF                | W.H.A.T. | eCRF                  | W.H.A.T. | eCRF                      | W.H.A.T. | eCRF                 | W.H.A.T. | eCRF                   | W.H.A.T. |
| <b>Randomization</b>                          | 32 (37)                  | 23 (26)  | 18 (27)             | 68 (27)  | 2 (7)                 | 9 (15)   | 38 (38)                   | 26 (27)  | 21 (29)              | 67 (29)  | 1 (7)                  | 7 (15)   |
|                                               | 10 (68)                  | 13 (37)  | 3 (28)              | 69 (45)  | 0 (0)                 | 0 (15)   | 25 (80)                   | 16 (42)  | 10 (33)              | 77 (56)  | 0 (0)                  | 0 (8)    |
|                                               | 44 (1)                   | 41 (2)   | 44 (1)              | 41 (2)   | 44 (1)                | 41 (2)   | 110 (0)                   | 102 (9)  | 110 (0)              | 102 (9)  | 108 (2)                | 102 (9)  |
| <b>Week 1</b>                                 | 72 (37)                  | 22 (26)  | 7 (13)              | 70 (28)  | 2 (7)                 | 9 (15)   | 54 (35)                   | 24 (27)  | 22 (24)              | 72 (27)  | 5 (14)                 | 5 (9)    |
|                                               | 90 (50)                  | 9 (41)   | 0 (10)              | 75 (50)  | 0 (0)                 | 0 (11)   | 63 (70)                   | 13 (42)  | 13 (28)              | 78 (42)  | 0 (1)                  | 0 (6)    |
|                                               | 44 (5)                   | 41 (8)   | 44 (6)              | 41 (8)   | 44 (7)                | 41 (8)   | 110 (16)                  | 102 (27) | 110 (16)             | 102 (27) | 108 (19)               | 102 (27) |
| <b>Week 3</b>                                 | 77 (32)                  | 16 (24)  | 11 (19)             | 79 (26)  | 1 (4)                 | 6 (14)   | 61 (31)                   | 24 (27)  | 25 (25)              | 75 (26)  | 4 (11)                 | 3 (7)    |
|                                               | 93 (34)                  | 2 (29)   | 0 (20)              | 91 (37)  | 0 (0)                 | 0 (1)    | 70 (50)                   | 15 (42)  | 20 (35)              | 83 (41)  | 0 (0)                  | 0 (1)    |
|                                               | 44 (6)                   | 41 (9)   | 44 (7)              | 41 (9)   | 44 (7)                | 41 (9)   | 110 (9)                   | 102 (26) | 110 (10)             | 102 (26) | 108 (13)               | 102 (26) |
| <b>Week 5</b>                                 | 82 (29)                  | 10 (16)  | 9 (19)              | 87 (17)  | 1 (4)                 | 3 (9)    | 65 (29)                   | 19 (27)  | 24 (24)              | 78 (27)  | 3 (9)                  | 3 (11)   |
|                                               | 95 (20)                  | 4 (11)   | 2 (10)              | 93 (21)  | 0 (0)                 | 0 (1)    | 73 (46)                   | 4 (34)   | 13 (37)              | 93 (35)  | 0 (0)                  | 0 (0)    |
|                                               | 44 (7)                   | 41 (16)  | 44 (8)              | 41 (16)  | 44 (9)                | 41 (16)  | 110 (19)                  | 102 (27) | 110 (22)             | 102 (27) | 108 (22)               | 102 (27) |
| <b>Week 8</b>                                 | 85 (27)                  | 15 (25)  | 6 (13)              | 82 (26)  | 2 (6)                 | 3 (8)    | 74 (27)                   | 20 (26)  | 18(21)               | 77 (27)  | 3 (10)                 | 3 (12)   |
|                                               | 100 (20)                 | 1 (16)   | 0 (5)               | 96 (35)  | 0 (0)                 | 0 (0)    | 80 (31)                   | 3 (38)   | 10 (18)              | 91 (43)  | 0 (0)                  | 0 (0)    |
|                                               | 44 (9)                   | 41 (16)  | 44 (10)             | 41 (16)  | 44 (9)                | 41 (16)  | 110 (18)                  | 102 (30) | 110 (21)             | 102 (30) | 108 (25)               | 102 (30) |
| <b>Week 12</b>                                | 86 (26)                  | 13 (24)  | 6 (14)              | 85 (26)  | 2 (9)                 | 2 (6)    | 77 (27)                   | 18 (25)  | 16 (20)              | 80 (25)  | 3 (11)                 | 2 (6)    |
|                                               | 100 (18)                 | 1 (13)   | 0 (4)               | 99 (20)  | 0 (0)                 | 0 (0)    | 85 (29)                   | 3 (36)   | 10 (20)              | 92 (36)  | 0 (0)                  | 0 (0)    |
|                                               | 44 (26)                  | 41 (34)  | 44 (26)             | 41 (32)  | 44 (28)               | 41 (32)  | 110 (72)                  | 101 (78) | 110 (73)             | 102 (79) | 108 (73)               | 102 (80) |
| <b>Week 16</b>                                | 87 (25)                  | 12 (22)  | 6 (14)              | 86 (24)  | 0.1 (1)               | 1 (6)    | 80 (30)                   | 19 (25)  | 14 (24)              | 80 (26)  | 2 (11)                 | 1 (5)    |
|                                               | 100 (15)                 | 0 (14)   | 0 (1)               | 100 (20) | 0 (0)                 | 0 (0)    | 95 (20)                   | 5 (36)   | 0 (20)               | 92 (36)  | 0 (0)                  | 0 (0)    |
|                                               | 44 (14)                  | 41 (25)  | 44 (16)             | 41 (25)  | 44 (15)               | 41 (25)  | 110 (18)                  | 102 (42) | 110 (21)             | 102 (42) | 108 (24)               | 102 (42) |

Supplement Table 14: Wound tissue composition at each observation time point during the study treatment time of maximum 16 weeks in the PP population

Wound tissue composition (granulation, fibrin, and necrosis) is presented for the data documented in the eCRF and for the data derived from the photo analysis using the Wound Healing Analyzing Tool (W.H.A.T.). Data show Mean and Standard Deviation (SD) and Median and Inter-Quartile Range (IQR) as well the number (N) of values analyzed for the PP population and the number (N) of values substituted by the last observation carried forward (LOCF) method (in brackets).

| <b>Pain in the PP population</b> | <b>Total<br/>N=154</b>          | <b>NPWT<br/>N=44</b>             | <b>SMWC<br/>N=110</b>            |
|----------------------------------|---------------------------------|----------------------------------|----------------------------------|
| <b>Screening</b>                 | 1.3 (2.1)<br>0 (2)<br>N=44 (0)  | 1.8 (2.3)<br>1 (3)<br>N=110 (0)  | 1,8 (2,3)<br>1 (3)<br>N=110 (0)  |
| <b>Week 1</b>                    | 0.7 (1.5)<br>0 (1)<br>N=44 (0)  | 1.4 (2.1)<br>0 (3)<br>N=110 (5)  | 1,4 (2,1)<br>0 (3)<br>N=110 (5)  |
| <b>Week 3</b>                    | 0.4 (0.7)<br>0 (1)<br>N=44 (4)  | 1.3 (1.8)<br>0 (2)<br>N=110 (3)  | 1,3 (1,8)<br>0 (2)<br>N=110 (3)  |
| <b>Week 5</b>                    | 0.3 (0.8)<br>0 (0)<br>N=44 (2)  | 1.0 (1.6)<br>0 (2)<br>N=110 (5)  | 1,0 (1,6)<br>0 (2)<br>N=110 (5)  |
| <b>Week 8</b>                    | 0.4 (1.1)<br>0 (0)<br>N=44 (4)  | 0.9 (1.5)<br>0 (2)<br>N=110 (9)  | 0,9 (1,5)<br>0 (2)<br>N=110 (9)  |
| <b>Week 12</b>                   | 0.3 (1.0)<br>0 (0)<br>N=44 (11) | 0.7 (1.3)<br>0 (1)<br>N=110 (18) | 0,7 (1,3)<br>0 (1)<br>N=110 (18) |
| <b>Week 16</b>                   | 0.2 (0.7)<br>0 (0)<br>N=44 (14) | 0.5 (1.2)<br>0 (0)<br>N=110 (13) | 0,5 (1,2)<br>0 (0)<br>N=110 (13) |

Supplement Table 15: Pain evaluation at the pre-defined observation time points during the active study treatment time of 16 weeks in the PP population

Data show Mean and Standard Deviation (SD) and Median and Inter Quartile Range (IQR) as well the Number (N) of values analyzed for the PP population and the Number (N) of values substituted by the last observation carried forward (LOCF) method (in brackets).

| <b>Quality of Life (EQ5D) in the PP population</b> | <b>Total<br/>N=154</b>                  | <b>NPWT<br/>N=44</b>                   | <b>SMWC<br/>N=110</b>                   |
|----------------------------------------------------|-----------------------------------------|----------------------------------------|-----------------------------------------|
| <b>Screening</b>                                   | 0.60 (0.21)<br>0.60 (0.24)<br>N=142 (4) | 0.61 (0.23)<br>0.63 (0.24)<br>N=42 (1) | 0.60 (0.20)<br>0.59 (0.25)<br>N=100 (3) |

|                                            |             |             |             |
|--------------------------------------------|-------------|-------------|-------------|
| <b>End of therapy</b>                      | 0.76 (0.19) | 0.65 (0.20) | 0.81 (0.14) |
|                                            | 0.76 (0.26) | 0.78 (0.20) | 0.87 (0.26) |
|                                            | N=34 (2)    | N=26 (2)    | N=8 (0)     |
| <b>End of maximum study treatment time</b> | 0.66 (0.22) | 0.65 (0.25) | 0.66 (0.21) |
|                                            | 0.63 (0.28) | 0.66 (0.43) | 0.63 (0.28) |
|                                            | N=92 (2)    | N=19 (0)    | N=73 (2)    |
| <b>Follow up after 6 months</b>            | 0.71 (0.23) | 0.75 (0.22) | 0.70 (0.23) |
|                                            | 0.77 (0.34) | 0.78 (0.30) | 0.77 (0.34) |
|                                            | N=99 (2)    | N=26 (0)    | N=73 (2)    |

Supplement Table 16: Quality of life evaluated with the EQ5D instrument at the pre-defined observation time points during the active study treatment time of 16 weeks in the PP population

Data show Mean and Standard Deviation (SD) and Median and Inter Quartile Range (IQR) as well the number (N) of values analyzed for the PP population and the Number (N) of values substituted by the last observation carried forward (LOCF) method (in brackets).





## CONSORT 2010 checklist of information to include when reporting a randomised trial\*

| Section/Topic                    | Item No | Checklist item                                                                                                                                                                              | Reported on page No |
|----------------------------------|---------|---------------------------------------------------------------------------------------------------------------------------------------------------------------------------------------------|---------------------|
| <b>Title and abstract</b>        |         |                                                                                                                                                                                             |                     |
|                                  | 1a      | Identification as a randomised trial in the title                                                                                                                                           | 1                   |
|                                  | 1b      | Structured summary of trial design, methods, results, and conclusions (for specific guidance see CONSORT for abstracts)                                                                     | 2                   |
| <b>Introduction</b>              |         |                                                                                                                                                                                             |                     |
| Background and objectives        | 2a      | Scientific background and explanation of rationale                                                                                                                                          | 3-5                 |
|                                  | 2b      | Specific objectives or hypotheses                                                                                                                                                           | 6                   |
| <b>Methods</b>                   |         |                                                                                                                                                                                             |                     |
| Trial design                     | 3a      | Description of trial design (such as parallel, factorial) including allocation ratio                                                                                                        | 6                   |
|                                  | 3b      | Important changes to methods after trial commencement (such as eligibility criteria), with reasons                                                                                          | 6,8,9               |
| Participants                     | 4a      | Eligibility criteria for participants                                                                                                                                                       | 6,7                 |
|                                  | 4b      | Settings and locations where the data were collected                                                                                                                                        | 6                   |
| Interventions                    | 5       | The interventions for each group with sufficient details to allow replication, including how and when they were actually administered                                                       | 7,8                 |
| Outcomes                         | 6a      | Completely defined pre-specified primary and secondary outcome measures, including how and when they were assessed                                                                          | 8,9                 |
|                                  | 6b      | Any changes to trial outcomes after the trial commenced, with reasons                                                                                                                       | n.a.                |
| Sample size                      | 7a      | How sample size was determined                                                                                                                                                              | 9,10                |
|                                  | 7b      | When applicable, explanation of any interim analyses and stopping guidelines                                                                                                                | n.a.                |
| <b>Randomisation:</b>            |         |                                                                                                                                                                                             |                     |
| Sequence generation              | 8a      | Method used to generate the random allocation sequence                                                                                                                                      | 7                   |
|                                  | 8b      | Type of randomisation; details of any restriction (such as blocking and block size)                                                                                                         | 7                   |
| Allocation concealment mechanism | 9       | Mechanism used to implement the random allocation sequence (such as sequentially numbered containers), describing any steps taken to conceal the sequence until interventions were assigned | 7                   |
| Implementation                   | 10      | Who generated the random allocation sequence, who enrolled participants, and who assigned participants to interventions                                                                     | 7                   |
| Blinding                         | 11a     | If done, who was blinded after assignment to interventions (for example, participants, care providers, those                                                                                | 7                   |

|                                                      |     |                                                                                                                                                   |                |
|------------------------------------------------------|-----|---------------------------------------------------------------------------------------------------------------------------------------------------|----------------|
|                                                      |     | assessing outcomes) and how                                                                                                                       |                |
|                                                      | 11b | If relevant, description of the similarity of interventions                                                                                       | n.a.           |
| Statistical methods                                  | 12a | Statistical methods used to compare groups for primary and secondary outcomes                                                                     | 10             |
|                                                      | 12b | Methods for additional analyses, such as subgroup analyses and adjusted analyses                                                                  | 10             |
| <b>Results</b>                                       |     |                                                                                                                                                   |                |
| Participant flow (a diagram is strongly recommended) | 13a | For each group, the numbers of participants who were randomly assigned, received intended treatment, and were analysed for the primary outcome    | 12 Fig. 1      |
|                                                      | 13b | For each group, losses and exclusions after randomisation, together with reasons                                                                  | Fig. 1         |
| Recruitment                                          | 14a | Dates defining the periods of recruitment and follow-up                                                                                           | 12             |
|                                                      | 14b | Why the trial ended or was stopped                                                                                                                | n.a.           |
| Baseline data                                        | 15  | A table showing baseline demographic and clinical characteristics for each group                                                                  | 12,13,14Tab. 1 |
| Numbers analysed                                     | 16  | For each group, number of participants (denominator) included in each analysis and whether the analysis was by original assigned groups           | Fig. 1         |
| Outcomes and estimation                              | 17a | For each primary and secondary outcome, results for each group, and the estimated effect size and its precision (such as 95% confidence interval) | 14-20          |
|                                                      | 17b | For binary outcomes, presentation of both absolute and relative effect sizes is recommended                                                       | 14-20          |
| Ancillary analyses                                   | 18  | Results of any other analyses performed, including subgroup analyses and adjusted analyses, distinguishing pre-specified from exploratory         | 18-19          |
| Harms                                                | 19  | All important harms or unintended effects in each group (for specific guidance see CONSORT for harms)                                             | 19-20          |
| <b>Discussion</b>                                    |     |                                                                                                                                                   |                |
| Limitations                                          | 20  | Trial limitations, addressing sources of potential bias, imprecision, and, if relevant, multiplicity of analyses                                  | 3,21-22        |
| Generalisability                                     | 21  | Generalisability (external validity, applicability) of the trial findings                                                                         | 22             |
| Interpretation                                       | 22  | Interpretation consistent with results, balancing benefits and harms, and considering other relevant evidence                                     | 21             |
| <b>Other information</b>                             |     |                                                                                                                                                   |                |
| Registration                                         | 23  | Registration number and name of trial registry                                                                                                    | 2              |
| Protocol                                             | 24  | Where the full trial protocol can be accessed, if available                                                                                       | 6              |
| Funding                                              | 25  | Sources of funding and other support (such as supply of drugs), role of funders                                                                   | 10-11          |

\*We strongly recommend reading this statement in conjunction with the CONSORT 2010 Explanation and Elaboration for important clarifications on all the items. If relevant, we also recommend reading CONSORT extensions for cluster randomised trials, non-inferiority and equivalence trials, non-pharmacological treatments, herbal interventions, and pragmatic trials. Additional extensions are forthcoming: for those and for up to date references relevant to this checklist, see [www.consort-statement.org](http://www.consort-statement.org).
