# Supplementary material for: Negative pressure wound therapy compared with standard moist wound care on diabetic foot ulcers in real-life clinical practice: results of the German DiaFu-RCT
Source: PubMed Central journal article supplement — BMJ Open. 2020 Mar 23;10(3):e026345. doi: 10.1136/bmjopen-2018-026345 (PMC7202734; doi:10.1136/bmjopen-2018-026345), 2020-03-23
Supplement: bmjopen-2018-026345supp001.pdf [file bmjopen-2018-026345supp001.pdf]

## Supplement

| Baseline parameters of the ITT population             | Total<br>N=345 (100 %) | NPWT<br>N=171 (49.6%) | SMWC<br>N=174 (50.4%) |
|-------------------------------------------------------|------------------------|-----------------------|-----------------------|
| <b>Alcohol</b>                                        |                        |                       |                       |
| Occasionally                                          | 157 of 341 (46%)       | 83 of 169 (48.5%)     | 74 of 172 (42.3%)     |
| Chronic                                               | 10 of 341 (2.9%)       | 3 of 169 (1.8%)       | 7 of 172 (4.0%)       |
| No                                                    | 174 of 341(51%)        | 83 of 171 (48.5%)     | 91 of 174 (52%)       |
| <b>Smoking</b>                                        | 293 of 342 (85.7%)     | 144 of 169 (84.3%)    | 149 of 173 (85.1%)    |
| <b>Number of years Mean (SD)</b>                      | 34.8 (13.5)            | 36.5 (14.9)           | 33.1 (12.1)           |
| <b>Packs / day Mean</b>                               | 1.1                    | 1.1                   | 1.2                   |
| <b>Drugs</b>                                          |                        |                       |                       |
| Occasionally                                          | 1 of 341 (0.3%)        | 1 of 169 (0.6%)       | 0 of 172 (0%)         |
| Chronic                                               | 2 of 341 (0.6%)        | 0 of 169 (0%)         | 2 of 172 (1.1%)       |
| No                                                    | 338 of 341 (97.7%)     | 168 of 169 (98.2%)    | 170 of 172 (97.1%)    |
| <b>Allergies</b>                                      | 37 of 343 (10.7%)      | 16 of 170 (9.4%)      | 21 of 173 (12.0%)     |
| <b>Subjective assessment of nutritional condition</b> |                        |                       |                       |
| Well-nourished                                        | 325 of 342 (94.2%)     | 162 of 169 (94.7%)    | 163 of 173 (93.7%)    |
| Moderately malnourished or suspected malnutrition     | 11 of 342 (3.2%)       | 4 of 169 (2.3%)       | 7 of 173 (4%)         |
| Malnourished                                          | 0 of 342 (0%)          | 0 of 169 (0%)         | 0 of 173 (0%)         |

Supplement Table 1: Supplementary baseline characteristics of the Intention To Treat (ITT) population

The table shows baseline parameters of the ITT population. Data are Number (N) and Percentage (%), Mean or Mean and Standard Deviation (SD).

| Wound surface area (mm <sup>2</sup> ) in the ITT population | Calculated from width and length (according to eCRF entry)<br>NPWT<br>N=171 | Results of the photo analysis with the W.H.A.T.<br>NPWT<br>N=171 | Calculated from width and length (according to eCRF entry)<br>SMWC<br>N=174 | Results of the photo analysis with the W.H.A.T.<br>SMWC<br>N=174 |
|-------------------------------------------------------------|-----------------------------------------------------------------------------|------------------------------------------------------------------|-----------------------------------------------------------------------------|------------------------------------------------------------------|
| <b>Randomization</b>                                        | 1060 (1536)<br>550 (1236)<br>N=171 (2)                                      | 687 (879)<br>321 (760)<br>N=118 (10)                             | 1141 (3247)<br>471 (1007)<br>N=174 (0)                                      | 664 (1050)<br>316 (658)<br>N=129 (13)                            |
| <b>Week 1</b>                                               | 847 (1489)<br>397 (801)<br>N=171 (15)                                       | 643 (820)<br>329 (750)<br>N=118 (32)                             | 1085 (3234)<br>395 (867)<br>N=174 (25)                                      | 713 (1065)<br>307 (749)<br>N=129 (36)                            |

|                |             |            |             |             |
|----------------|-------------|------------|-------------|-------------|
| <b>Week 3</b>  | 810 (1472)  | 590 (742)  | 1025 (3242) | 701 (1212)  |
|                | 314 (860)   | 273 (633)  | 390 (913)   | 266 (768)   |
|                | N=171 (24)  | N=118 (28) | N=174 (22)  | N=129 (35)  |
| <b>Week 5</b>  | 717 (1379)  | 607 (828)  | 759 (1466)  | 610 (1119)  |
|                | 275 (769)   | 231 (843)  | 267 (824)   | 219 (635)   |
|                | N=171 (37)  | N=118 (42) | N=174 (41)  | N=129 (38)  |
| <b>Week 8</b>  | 636 (1322)  | 495 (770)  | 674 (1410)  | 501 (937)   |
|                | 220 (712)   | 182 (561)  | 186 (783)   | 165 (481)   |
|                | N=171 (52)  | N=118 (48) | N=174 (42)  | N=129 (42)  |
| <b>Week 12</b> | 549 (858)   | 457 (742)  | 570 (940)   | 493 (950)   |
|                | 165 (964)   | 134 (494)  | 169 (632)   | 133 (498)   |
|                | N=171 (110) | N=118 (88) | N=174 (124) | N=129 (104) |
| <b>Week 16</b> | 440 (810)   | 334 (649)  | 493 (1095)  | 351 (750)   |
|                | 79 (471)    | 114 (363)  | 69 (415)    | 77 (320)    |
|                | N=171 (80)  | N=118 (66) | N=174 (63)  | N=129 (56)  |

Supplement Table 2: Wound surface area at each observation time point during the study treatment time of maximum 16 weeks in the ITT population

The table shows the wound surface area at each study visit until the end of maximum study treatment time after 16 weeks calculated data from width and length as documented in the eCRF and for the data derived from the photo analysis with the Wound Healing Analyzing Tool (W.H.A.T.) in the ITT population. An elliptical wound surface area has been calculated from the documented width and length (eCRF) [ $\pi / 4 \times \text{length} \times \text{width} = \text{area}$ ]. Data show Mean and Standard Deviation (SD) and Median and Inter Quartile Range (IQR) as well the Number (N) of values available for analysis and the number of values substituted by the last observation carried forward (LOCF) method (in brackets).

| <b>Wound volume (mm<sup>3</sup>) in the ITT population</b> | <b>NPWT<br/>N=171</b>                      | <b>SMWC<br/>N=174</b>                       |
|------------------------------------------------------------|--------------------------------------------|---------------------------------------------|
| <b>Randomization</b>                                       | 22498 (58930)<br>4710 (15048)<br>N=171 (2) | 21740 (74181)<br>4759 (12888)<br>N=174 (0)  |
| <b>Week 1</b>                                              | 13203 (28709)<br>2487 (6908)<br>N=171 (15) | 19979 (73143)<br>3533 (11407)<br>N=174 (26) |
| <b>Week 3</b>                                              | 10708 (28521)<br>1884 (6857)<br>N=171 (24) | 16217 (67494)<br>2293 (8831)<br>N=174 (23)  |
| <b>Week 5</b>                                              | 7700 (19719)<br>1166 (5338)                | 11286 (32566)<br>1365 (7539)                |

|                | N=171 (37)                                | N=174 (42)                                |
|----------------|-------------------------------------------|-------------------------------------------|
| <b>Week 8</b>  | 5592 (11535)<br>785 (4604)<br>N=171 (78)  | 8772 (27674)<br>812 (5258)<br>N=174 (67)  |
| <b>Week 12</b> | 5333 (12422)<br>565 (3913)<br>N=171 (119) | 6639 (16454)<br>625 (4083)<br>N=174 (133) |
| <b>Week 16</b> | 3880 (10534)<br>141 (1890)<br>N=171 (83)  | 5465 (14874)<br>200 (1587)<br>N=174 (64)  |

Supplement Table 3: Wound volume at each observation time point during the study treatment time of maximum 16 weeks in the ITT population

The table shows the wound volume at each study visit until the end of the maximum study treatment time of 16 weeks in the ITT population. Wound volume was calculated from width, length and depth as documented in the eCRF. Data show Mean and Standard Deviation (SD) and Median and Inter Quartile Range (IQR) as well the number (N) of values available for analysis and the number of values substituted by the last observation carried forward (LOCF) method (in brackets).

| Wound tissue composition in the ITT population | NPWT Granulation<br>N=171 |          | NPWT Fibrin<br>N=171 |          | NPWT Necrosis<br>N=171 |          | SMWC Granulation<br>N=174 |           | SMWC Fibrin<br>N=174 |          | SMWC Necrosis<br>N=174 |          |
|------------------------------------------------|---------------------------|----------|----------------------|----------|------------------------|----------|---------------------------|-----------|----------------------|----------|------------------------|----------|
|                                                | eCRF                      | W.H.A.T. | eCRF                 | W.H.A.T. | eCRF                   | W.H.A.T. | eCRF                      | W.H.A.T.  | eCRF                 | W.H.A.T. | eCRF                   | W.H.A.T. |
| Randomization                                  | 34 (36)                   | 22 (25)  | 21 (28)              | 71 (27)  | 3 (10)                 | 7 (15)   | 34 (37)                   | 24 (26)   | 22 (29)              | 69 (28)  | 2 (9)                  | 7 (14)   |
|                                                | 20 (70)                   | 12 (37)  | 10 (30)              | 79 (46)  | 0 (0)                  | 0 (5)    | 20 (71)                   | 14 (39)   | 10 (40)              | 79 (44)  | 0 (0)                  | 0 (8)    |
|                                                | 171 (2)                   | 118 (8)  | 170 (4)              | 118 (8)  | 169 (5)                | 118 (8)  | 174 (3)                   | 129 (12)  | 174 (1)              | 129 (12) | 172 (2)                | 129 (12) |
| Week 1                                         | 58 (35)                   | 21 (25)  | 19 (22)              | 73 (27)  | 5 (13)                 | 6 (12)   | 49 (35)                   | 21 (25)   | 24 (27)              | 74 (26)  | 6 (15)                 | 5 (9)    |
|                                                | 70 (70)                   | 10 (36)  | 10 (30)              | 81 (47)  | 0 (2)                  | 0 (5)    | 50 (70)                   | 10 (36)   | 15 (31)              | 85 (40)  | 0 (5)                  | 0 (5)    |
|                                                | 171 (16)                  | 118 (32) | 71 (19)              | 118 (32) | 169 (23)               | 118 (32) | 174 (28)                  | 129 (36)  | 174 (27)             | 129 (36) | 172 (30)               | 129 (36) |
| Week 3                                         | 67 (31)                   | 16 (23)  | 18 (22)              | 80 (25)  | 5 (13)                 | 4 (11)   | 57 (32)                   | 21 (25)   | 25 (26)              | 77 (25)  | 5 (13)                 | 3 (7)    |
|                                                | 80 (55)                   | 5 (25)   | 10 (30)              | 91 (30)  | 0 (0)                  | 0 (1)    | 60 (60)                   | 10 (36)   | 20 (35)              | 85 (36)  | 0 (3)                  | 0 (1)    |
|                                                | 171 (26)                  | 118 (27) | 171 (30)             | 118 (27) | 169 (28)               | 118 (27) | 174 (24)                  | 129 (35)  | 174 (25)             | 129 (35) | 172 (30)               | 129 (35) |
| Week 5                                         | 70 (30)                   | 15 (22)  | 18 (24)              | 83 (22)  | 4 (13)                 | 2 (8)    | 62 (31)                   | 18 (26)   | 23 (25)              | 80 (26)  | 4 (12)                 | 3 (10)   |
|                                                | 80 (45)                   | 6 (21)   | 10 (25)              | 91 (26)  | 0 (0)                  | 0 (1)    | 63 (50)                   | 4 (32)    | 10 (39)              | 93 834)  | 0 (0)                  | 0 (0)    |
|                                                | 171 (36)                  | 118 (43) | 171 (38)             | 118 (43) | 169 (42)               | 118 (43) | 174 (44)                  | 129 (36)  | 174 (47)             | 129 (36) | 172 (46)               | 129 (36) |
| Week 8                                         | 74 (30)                   | 16 (23)  | 17 (24)              | 82 (24)  | 4 (13)                 | 2 (6)    | 70 (29)                   | 17 (24)   | 17 (21)              | 80 (25)  | 5 (13)                 | 3 (11)   |
|                                                | 90 (40)                   | 4 (27)   | 10 (20)              | 93 (33)  | 0 (0)                  | 0 (0)    | 80 (40)                   | 3 (33)    | 10 (20)              | 92 (36)  | 0 (0)                  | 0 (0)    |
|                                                | 171 (53)                  | 118 (48) | 171 (56)             | 118 (48) | 171 (59)               | 118 (48) | 174 (44)                  | 129 (43)  | 174 (49)             | 129 (43) | 174 (52)               | 129 (43) |
| Week 12                                        | 75 (30)                   | 15 (23)  | 17 (25)              | 83 (24)  | 4 (13)                 | 1 (5)    | 73 (29)                   | 16 (23)   | 16 (20)              | 82 (23)  | 5 (13)                 | 2 (6)    |
|                                                | 90 (40)                   | 4 (22)   | 5 (20)               | 96 (23)  | 0 (0)                  | 0 (0)    | 80 (38)                   | 3 (29)    | 10 (20)              | 93 (32)  | 0 (0)                  | 0 (0)    |
|                                                | 171(115)                  | 118 (89) | 171(118)             | 118 (89) | 171(119)               | 118 (89) | 174(124)                  | 129(102)  | 174(125)             | 129(102) | 172(126)               | 129(102) |
| Week 16                                        | 77 (30)                   | 13 (22)  | 14 (22)              | 86 (24)  | 3 (10)                 | 1 (6)    | 76 (30)                   | 17 (24)   | 15 (24)              | 81 (24)  | 3 (13)                 | 2 (6)    |
|                                                | 90 (40)                   | 1 (17)   | 2 (20)               | 98 (19)  | 0 (0)                  | 0 (0)    | 90 (40)                   | 4 (31)    | 5 (20)               | 93 (35)  | 0 (0)                  | 0 (0)    |
|                                                | 171 (78)                  | 118 (66) | 171 (79)             | 118 (66) | 171 (82)               | 118 (66) | 174 (62)                  | 129 (576) | 174 (65)             | 129 (56) | 174 (66)               | 129 (56) |

Supplement Table 4: Wound tissue composition at each observation time point during the study treatment time of maximum 16 weeks in the ITT population.

Wound tissue composition (granulation, fibrin, and necrosis) is presented for the data documented in the eCRF and for the data derived from the photo analysis using the Wound Healing Analyzing Tool (W.H.A.T.). Data show Mean and Standard Deviation (SD) and Median and Inter Quartile Range (IQR) as well the number (N) of values analyzed for the ITT population and the number (N) of values substituted by the last observation carried forward (LOCF) method (in brackets).

| <b>Pain<br/>in the ITT population</b> | <b>Total<br/>N=345</b>            | <b>NPWT<br/>N=171</b>            | <b>SMWC<br/>N=174</b>            |
|---------------------------------------|-----------------------------------|----------------------------------|----------------------------------|
| <b>Screening</b>                      | 2.1 (2.4)<br>1 (4)<br>N=344 (0)   | 2.1 (2.3)<br>1 (4)<br>N=171 (0)  | 2.1 (2.4)<br>1 (4)<br>N=173 (0)  |
| <b>Week 1</b>                         | 1.7 (2.2)<br>1 (3)<br>N=344 (6)   | 1.6 (2.2)<br>0 (2)<br>N=171 (1)  | 1.8 (2.2)<br>1 (3)<br>N=173 (5)  |
| <b>Week 3</b>                         | 1.5 (2.0)<br>1 (2)<br>N=344 (27)  | 1.3 (1.9)<br>0 (2)<br>N=171 (11) | 1.7 (2.1)<br>1 (3)<br>N=173 (16) |
| <b>Week 5</b>                         | 1.3 (1.9)<br>0 (2)<br>N=344 (45)  | 1.2 (1.9)<br>0 (2)<br>N=171 (21) | 1.4 (2.0)<br>0 (2)<br>N=173 (24) |
| <b>Week 8</b>                         | 1.3 (1.9)<br>0 (2)<br>N=344 (70)  | 1.2 (1.9)<br>0 (2)<br>N=171 (38) | 1.3 (1.9)<br>0 (2)<br>N=173 (32) |
| <b>Week 12</b>                        | 1.1 (1.8)<br>0 (2)<br>N=344 (115) | 1.2 (1.9)<br>0 (2)<br>N=171 (64) | 1.1 (1.8)<br>0 (2)<br>N=173 (51) |
| <b>Week 16</b>                        | 1.0 (1.7)<br>0 (1)<br>N=344 (129) | 1.0 (1.7)<br>0 (2)<br>N=171 (76) | 0.9 (1.7)<br>0 (1)<br>N=173 (53) |

Supplement Table 5: Pain in the course of the study treatment time of maximum 16 weeks in the ITT population

The table shows the results of the pain evaluation at the pre-defined observation time points during the active study treatment time of 16 weeks in the ITT population. Data show Mean and Standard Deviation (SD) and Median and Inter Quartile Range (IQR) as well the Number (N) of values analyzed for the ITT population and the number (N) of values substituted by the last observation carried forward (LOCF) method (in brackets).

| <b>Quality of Life (EQ5D)<br/>in the ITT population</b> | <b>Total<br/>N=345</b>                  | <b>NPWT<br/>N=171</b>                  | <b>SMWC<br/>N=174</b>                   |
|---------------------------------------------------------|-----------------------------------------|----------------------------------------|-----------------------------------------|
| <b>Screening</b>                                        | 0.53 (0.25)<br>0.53 (0.18)<br>N=317 (5) | 0.53 (0.27)<br>0.53 (0.2)<br>N=156 (2) | 0.53 (0.24)<br>0.53 (0.18)<br>N=159 (3) |

|                                            |             |             |             |
|--------------------------------------------|-------------|-------------|-------------|
| <b>End of therapy</b>                      | 0.68 (0.23) | 0.67 (0.24) | 0.72 (0.17) |
|                                            | 0.76 (0.34) | 0.77 (0.29) | 0.66 (0.35) |
|                                            | N=75 (2)    | N=62 (2)    | N=13 (0)    |
| <b>End of maximum study treatment time</b> | 0.63 (0.24) | 0.66 (0.22) | 0.61 (0.25) |
|                                            | 0.63 (0.28) | 0.66 (0.28) | 0.63 (0.24) |
|                                            | N=158 (4)   | N=63 (2)    | N=95 (2)    |
| <b>Follow up after 6 months</b>            | 0.68 (0.24) | 0.69 (0.26) | 0.67 (0.23) |
|                                            | 0.71 (0.39) | 0.77 (0.35) | 0.63 (0.39) |
|                                            | N=190 (5)   | N=93 (3)    | N=97 (2)    |

Supplement Table 6: Quality of life (EQ5D) in the course of the study treatment time of 16 week in the ITT-population. Quality of life evaluated with the EQ5D instrument at the pre-defined observation time points during the active study treatment time of 16 weeks in the ITT population. Data show Mean and Standard Deviation (SD) and Median and Inter Quartile Range (IQR) as well the Number (N) of values analyzed for the ITT population and the Number (N) of values substituted by the last observation carried forward (LOCF) method (in brackets).

| <b>Results for the subgroup of small wounds</b>                                                                                                  | <b>Total<br/>N=173 of 345</b> | <b>NPWT N=83<br/>of 171</b> | <b>SMWC<br/>N=90 of 174</b> | <b>Difference<br/>[95%CI]<br/>p</b> |
|--------------------------------------------------------------------------------------------------------------------------------------------------|-------------------------------|-----------------------------|-----------------------------|-------------------------------------|
| <b>Wound closure rate within 16 weeks</b>                                                                                                        |                               |                             |                             |                                     |
| N                                                                                                                                                | 28 of 173                     | 12 of 83                    | 16 of 90                    | 4                                   |
| %                                                                                                                                                | 16.2%                         | 14.5%                       | 17.8%                       | 3.3%                                |
| [95%CI]                                                                                                                                          | [10.7 – 21.7]%                | [6.9 – 22.0]                | [9.9 – 25.7]                | [-7.6 – 14.2]<br>0.6 (U)            |
| <b>Time until optimal preparation of the wound bed (min 95 % granulation tissue) within 16 weeks</b> <small>N<sub>available values</sub></small> | 100                           | 52                          | 48                          |                                     |
| <b>Mean (SD)</b>                                                                                                                                 | 38.6 (37.4)                   | 28.5 (30.0)                 | 49.5 (41.6)                 | 21.0 (11.0)                         |
| <b>Median (IQR)</b>                                                                                                                              | 26.5 (50.0)                   | 20.0 (28.0)                 | 48.0 (79.0)                 | [6.9 – 35.1]                        |
| <b>Min-Max</b>                                                                                                                                   | 0-114                         | 0-113                       | 0-114                       | 0.005*                              |
| <b>No. of study participants with amputations or resections within 16 weeks</b> N                                                                | 35 of 173                     | 19 of 83                    | 16 of 90                    | 3                                   |
| %                                                                                                                                                | 20.2%                         | 22.9%                       | 17.8%                       | 5.1%                                |
| [95%CI]                                                                                                                                          | [14.2 - 26.2]                 | [13.9 - 31.9]               | [9.9 - 25.7]                | [-6.9 – 17.1]<br>0.45 (F)           |

|                                                                     |               |                |                 |                           |
|---------------------------------------------------------------------|---------------|----------------|-----------------|---------------------------|
| <b>No. of performed amputations and resections N</b>                | 50            | 22             | 28              | 6                         |
| <b>No. of patients with minor amputations within 16 weeks N (%)</b> | 35 (20.2%)    | 19 (22.9%)     | 16 (17.8%)      | 3 (5.1%)<br>0.45 (F)      |
| <b>No. of patients with major amputations within 16 weeks N (%)</b> | 0 (0%)        | 0 (0%)         | 0 (0%)          | 0 (0%)<br>-               |
| <b>Wound closure rate at follow up after 6 months N</b>             | 37 von 173    | 13 of 83       | 24 of 90        | 11                        |
| <b>%</b>                                                            | 21,4%         | 15.7%          | 26.7%           | 11%                       |
| <b>[95%CI]</b>                                                      | [15.3 – 27.5] | [7.8 – 23.5] . | [17.5 – 35.8] . | [-1.0 - 23.0]<br>0.10 (U) |

Supplement Table 7: Results for the subgroup of small wounds

The table shows the wound closure rate, time until optimal preparation of the wound bed (min. 95% granulation), and amputations and resections within the maximum study treatment time of 16 weeks and wound closure rate within the study observation time of 6 months for the subgroup of small wounds. Data show the Number (N) of study participants and the Percentage (%), Mean and Standard Deviation (SD); Median and Inter Quartile Range (IQR); and Minimum (Min) and Maximum (Max). F=Fisher Exact Test; U=Man Whitney U-Test; \*Student's t-test

| <b>Results for the subgroup of large wounds</b>                                                                                          | <b>Total</b>          | <b>NPWT</b>           | <b>SMWC</b>            | <b>Difference</b>                 |
|------------------------------------------------------------------------------------------------------------------------------------------|-----------------------|-----------------------|------------------------|-----------------------------------|
|                                                                                                                                          | <b>172 of 345</b>     | <b>N=88 of 171</b>    | <b>N=84 of 174</b>     | <b>[95%CI]</b>                    |
|                                                                                                                                          |                       |                       |                        | <b>p</b>                          |
| <b>Wound closure rate within 16 weeks N</b>                                                                                              |                       |                       |                        |                                   |
| <b>%</b>                                                                                                                                 | 18 of 172             | 13 of 88              | 5 of 84                | 8                                 |
| <b>[95%CI]</b>                                                                                                                           | 10,5%<br>[5.9 – 15.0] | 14.8%<br>[7.4 – 22,2] | 6.0%<br>[0.9 – 11.0] . | 8.8%<br>[-0.2 - 17.8]<br>0.08 (U) |
| <b>Time until optimal preparation of the wound bed (min 95 % granulation tissue) within 16 weeks (days) N<sub>available values</sub></b> |                       |                       |                        |                                   |
| <b>Mean (SD)</b>                                                                                                                         | 80<br>47.8 (40.8)     | 47<br>43.4 (37.9)     | 33<br>54.0 (44.6)      | 10.6 (6.7)                        |
| <b>Median (IQR)</b>                                                                                                                      | 36.5 (70.0)           | 35.0 (61.0)           | 56.0 (105.0)           | [-7.6 – 28.8]                     |
| <b>Min-Max</b>                                                                                                                           | 0 - 127               | 0 - 127               | 0 -115                 | 0.27*                             |

|                                                                       |                 |               |               |               |
|-----------------------------------------------------------------------|-----------------|---------------|---------------|---------------|
| <b>No. of patients with amputations or resections within 16 weeks</b> |                 |               |               |               |
| <b>N</b>                                                              | 36 of 172       | 16 of 88      | 20 of 84      | 4             |
| <b>%</b>                                                              | 20.9            | 18.2%         | 23.8%         | 5.6%          |
| <b>[95%CI]</b>                                                        | [14.9 – 27.0] % | [10.1 – 26.2] | [14.7 – 32.9] | [-6.6 – 17.8] |
|                                                                       |                 |               |               | 0.45 (F)      |
| <b>No. of performed amputations and resections N</b>                  | 52              | 23            | 29            | 6             |
|                                                                       |                 |               |               | 0.41 (U)      |
| <b>No. of patients with minor amputations N (%)</b>                   | 34 (19.8%)      | 14 (15.9%)    | 20 (23.8%)    | 0.25 (F)      |
| <b>No. of patients with major amputations N (%)</b>                   | 2 (1.2%)        | 2 (2.3%)      | 0 (0%)        | 0.50 (F)      |
| <b>Wound closure rate at follow up after 6 months N</b>               | 23 of 172       | 11 of 88      | 12 of 84      | 1             |
| <b>%</b>                                                              | 13.4%           | 12.5%         | 14.3%         | -1.8%         |
| <b>[95%CI]</b>                                                        | [8.3 – 18.5]    | [5.6 – 19.4]  | [6.8 – 21.8]  | [-12.0 – 8.4] |
|                                                                       |                 |               |               | 0.82 (U)      |

Supplement Table 8: Results for the subgroup of large wounds

The table shows the wound closure rate, time until optimal preparation of the wound bed (min. 95% granulation), and amputations and resections within the maximum study treatment time of 16 weeks and the wound closure rate within the study observation time of 6 months for large wounds. Data show the Number (N) of study participants the Percentage (%), Mean and Standard Deviation (SD); Median and Inter Quartile Range (IQR); and Minimum (Min) and Maximum (Max). F=Fisher Exact Test; U=Man Whitney U-Test; \*Student's t-test

| <b>Demographic and baseline parameters of the PP Population</b> | <b>Total<br/>N=154<br/>(100%)</b> | <b>NPWT<br/>N=44<br/>(28.6%)</b> | <b>SMWC<br/>N=110<br/>(71.4%)</b> |
|-----------------------------------------------------------------|-----------------------------------|----------------------------------|-----------------------------------|
| <b>Male</b>                                                     | 113 of 154 (73.4%)                | 29 of 44 (65.9%)                 | 84 of 110 (76.4%)                 |
| <b>Female</b>                                                   | 41 of 154 (26.6%)                 | 15 of 44 (34.1%)                 | 26 of 110 (23.6%)                 |
| <b>Age in years</b>                                             | N=154                             | N=44                             | N=110                             |
| <b>Mean (SD)</b>                                                | 67.4 (10.6)                       | 66.5 (11.0)                      | 67.8 (10.4)                       |
| <b>Height in cm</b>                                             | N=153                             | N=43                             | N=110                             |
| <b>Mean (SD)</b>                                                | 173.8 (12.9)                      | 173.5 (17.4)                     | 174.0 (10.7)                      |
| <b>Weight in kg</b>                                             | N=150                             | N=42                             | N=108                             |
| <b>Mean (SD)</b>                                                | 95.4 (23.3)                       | 96.2 (21.6)                      | 95.1 (24.0)                       |



|                                                          |                    |                  |                   |
|----------------------------------------------------------|--------------------|------------------|-------------------|
| <b>Alcohol</b>                                           | N=153              | N=44             | N=109             |
| <b>Occasionally</b>                                      | 71 (46.4%)         | 22 (50.0%)       | 49 (45.0%)        |
| <b>Chronic</b>                                           | 3 (2.0%)           | 1 (2.3%)         | 2 (1.8%)          |
| <b>No</b>                                                | 79 (51.6%)         | 21 (47.7%)       | 58 (53.2%)        |
| <b>Smoking</b>                                           | 138 of 154 (89.6%) | 42 of 44 (95.5%) | 96 of 110 (87.3%) |
| <b>Number of years (Mean (SD))</b>                       | 37.0 (9.2)         | 42.0 (2.8)       | 36.3 (9.7)        |
| <b>Packs / day (Mean)</b>                                | 1.0                | 1.0              | 1.0               |
| <b>Drugs</b>                                             | N=153              | N=44             | N=109             |
| <b>Occasionally</b>                                      | 0 (0%)             | 0 (0%)           | 0 (0%)            |
| <b>Chronic</b>                                           | 1 (0.7%)           | 0 (0%)           | 1 (0.9%)          |
| <b>No</b>                                                | 152 (99.3%)        | 44 (100%)        | 108 (99.1%)       |
| <b>Requiring dialysis</b>                                | 11 of 154 (7.1 %)  | 2 of 44 (4.5%)   | 9 of 110 (8.2%)   |
| <b>Allergies</b>                                         | 16 of 154 (10.4%)  | 6 of 44 (13.6%)  | 10 of 110 (9.1%)  |
| <b>Subjective assessment of nutritional condition</b>    | N=150              | N=43             | N=107             |
| <b>Well-nourished</b>                                    | 147 (98.0%)        | 42 (97.7%)       | 105 (98.1%)       |
| <b>Moderately malnourished or suspected malnutrition</b> | 3 (2.0%)           | 1 (2.3%)         | 2 (1.9%)          |
| <b>Malnourished</b>                                      | 0 (0%)             | 0 (0%)           | 0 (0%)            |
| <b>Peripheral arterial occlusive disease (PAOD)</b>      | N=109 (70.8%)      | N=29 (65.9%)     | N=80 (72.7%)      |
| <b>without critical limb ischemia</b>                    | 103 (94.5%)        | 28 (96.6%)       | 75 (93.8%)        |
| <b>with critical limb ischemia</b>                       | 6 (5.5%)           | 1 (3.4%)         | 5 (6.3%)          |
| <b>Revascularisation before study start</b>              | N=9 (5.8%)         | N=1 (2.3%)       | N=8 (7.3%)        |
| <b>Percutaneous transluminal angioplasty (PTA)</b>       | 5 (55.6%)          | 0 (0.0%)         | 5 (62.5%)         |
| <b>PTA + Stent</b>                                       | 0 (0%)             | 0 (0%)           | 0 (0%)            |
| <b>Veins-Bypass</b>                                      | 1 (11.1%)          | 1 (100.0%)       | 0 (11.1%)         |
| <b>Polytetrafluoroethylene (PTFE) Bypass</b>             | 1 (11.1%)          | 0 (0%)           | 1 (12.5%)         |
| <b>Thromboendarterectomy and patch plastic</b>           | 2 (22.2%)          | 0 (0%)           | 2 (25.0%)         |
| <b>Revascularization with influence on the wound</b>     | 9 of 9 (100%)      | 1 of 1 (100%)    | 0 of 8 (100%)     |
| <b>Sufficient revascularization result</b>               | 9 of 9 (100%)      | 1 of 1 (100%)    | 8 of 8 (100%)     |
| <b>Insufficient revascularization result</b>             | 0 of 9 (0%)        | 0 of 1 (0%)      | 0 of 8 (0%)       |
| <b>Revascularization result not assessable</b>           | 0 of 9 (0%)        | 0 of 1 (0%)      | 0 of 8 (0%)       |

Supplement Table 9: Patient demographics and baseline characteristics of the Per Protocol (PP) population

Data are Number (N) and Percentage (%) and Mean and Standard Deviation (SD). "N=" is stating the number of patients with actual available information. Findings, diagnoses and procedures documented by the clinical investigators are presented.

| <b>Time until optimal wound bed preparation (min 95 % granulation tissue)</b> | <b>Total<br/>N=100</b> | <b>NPWT<br/>N=38</b> | <b>SMWC<br/>N=62</b> | <b>Mean difference<br/>[95%CI]<br/>p*</b> |
|-------------------------------------------------------------------------------|------------------------|----------------------|----------------------|-------------------------------------------|
| <b>Mean (SD)</b>                                                              | 43.8 (42.3)            | 23.8 (31.7)          | 56.0 (43.5)          | 32.2                                      |
| <b>Median (IQR)</b>                                                           | 30.0 (76)              | 8.5 (28.0)           | 56.0 (96.0)          | [16.3 – 48.1]                             |
| <b>Min - Max</b>                                                              | 0 - 127                | 0 - 127              | 0 - 115              | <b>&lt;0.001</b>                          |

Supplement Table 10: Time until optimal preparation of the wound for further treatment (minimum 95 % granulation tissue) in the PP population

Data show the number (N) of study participants with available values for the analysis in total and for both treatment arms; Mean and Standard Deviation (SD); Median and Inter Quartile Range (IQR); and Minimum (Min) and Maximum (Max).

\*Student's t-test

| <b>Amputations &amp; Resections in the PP population</b> | <b>Total<br/>N=154</b> | <b>NPWT<br/>N=44</b> | <b>SMWC<br/>N=110</b> | <b>Difference<br/>p</b>    |
|----------------------------------------------------------|------------------------|----------------------|-----------------------|----------------------------|
| <b>No. of patients with amputation or resection</b>      | 30 of 154              | 9 of 44              | 21 of 110             | 12                         |
| <b>N (%)</b>                                             | 19.5 %                 | 20.5 %               | 19.1 %                | 1.4%                       |
| <b>[95%CI]</b>                                           | [13,2 – 25,7]          | [8,5 - 32,4]         | [11,7 – 26,4]         | [-12.6 – 15.4]<br>0.83 (F) |
| <b>No. of amputations or resections</b>                  | 39                     | 11                   | 28                    | 17<br>0.86 (U)             |
| <b>No. of study participants with Minor-Amputations</b>  |                        |                      |                       |                            |
| <b>N (%)</b>                                             | 30 (18.9%)             | 9 (12.8%)            | 21 (21.4%)            | 12<br>0.83 (F)             |
| <b>No. of study participants with Major-Amputations</b>  |                        |                      |                       |                            |
| <b>N (%)</b>                                             | 0 (0%)                 | 0 (0%)               | 0 (0%)                | 0 (0%)<br>-                |

Supplement Table 11: Amputations and resections in the PP population

Data show the Number (N) of study participants available for the analysis in total and for both treatment arms and the Number (N) and the percentage (%) of study participants with amputations or resections, the number of amputations and

resections performed and the number and the percentage of participants with minor and major amputations. F = Fisher's Exact Test; U = Mann-Whitney U-Test.

| <b>Wound surface area (mm<sup>2</sup>) in the PP population</b> | <b>Calculated from width and length (according to eCRF entry)<br/>NPWT<br/>N=44</b> | <b>Results of the photo analysis with W.H.A.T.<br/>NPWT<br/>N=44</b> | <b>Calculated from width and length (according to eCRF entry)<br/>SMWC<br/>N=44</b> | <b>Results of the photo analysis with W.H.A.T.<br/>SMWC<br/>N=110</b> |
|-----------------------------------------------------------------|-------------------------------------------------------------------------------------|----------------------------------------------------------------------|-------------------------------------------------------------------------------------|-----------------------------------------------------------------------|
| <b>Randomization</b>                                            | 964 (1392)<br>345 (1426)<br>N= 44 (1)                                               | 633 (795)<br>299 (705)<br>N=41 (3)                                   | 878 (1266)<br>373 (889)<br>N= 110 (0)                                               | 669 (1143)<br>294 (692)<br>N=102 (9)                                  |
| <b>Week 1</b>                                                   | 525 (696)<br>224 (408)<br>N= 44 (5)                                                 | 524 (614)<br>318 (561)<br>N=41 (8)                                   | 827 (1238)<br>306 (863)<br>N= 110 (16)                                              | 706 (1138)<br>289 (775)<br>N=102 (27)                                 |
| <b>Week 3</b>                                                   | 428 (635)<br>176 (378)<br>N= 44 (6)                                                 | 477 (737)<br>165 (424)<br>N=41 (9)                                   | 803 (1306)<br>238 (867)<br>N= 110 (7)                                               | 714 (1316)<br>259 (656)<br>N=102 (26)                                 |
| <b>Week 5</b>                                                   | 355 (590)<br>100 (291)<br>N= 44 (8)                                                 | 418 (602)<br>165 (435)<br>N=41 (15)                                  | 650 (1157)<br>161 (670)<br>N= 110 (18)                                              | 607 (1212)<br>167 (545)<br>N=102 (29)                                 |
| <b>Week 8</b>                                                   | 284 (528)<br>53 (217)<br>N= 44 (8)                                                  | 320 (530)<br>83 (264)<br>N=41 (16)                                   | 569 (1072)<br>106 (443)<br>N= 110 (17)                                              | 479 (990)<br>123 (397)<br>N=102 (29)                                  |
| <b>Week 12</b>                                                  | 283 (580)<br>14 (130)<br>N= 44 (24)                                                 | 289 (537)<br>62 (175)<br>N=41 (32)                                   | 528 (1024)<br>79 (419)<br>N= 110 (71)                                               | 474 (1006)<br>111 (407)<br>N=102 (80)                                 |
| <b>Week 16</b>                                                  | 190 (416)<br>0 (95)<br>N= 44 (14)                                                   | 179 (333)<br>30 (204)<br>N=41 (25)                                   | 386 (1124)<br>31 (159)<br>N= 110 (19)                                               | 319 (724)<br>65 (256)<br>N=102 (42)                                   |

Supplement Table 12: Wound surface area at each observation time point during the study treatment time of maximum 16 weeks in the PP population

The table shows the wound surface area at each study visit until the end of maximum study treatment time after 16 weeks calculated data from width and length as documented in the eCRF and for the data derived from the photo analysis with the Wound Healing Analyzing Tool (W.H.A.T.) in the PP population. An elliptical wound surface area has been calculated from the documented width and length (eCRF) [ $(\pi / 4) \times \text{length} \times \text{width} = \text{area}$ ]. Data show Mean and Standard Deviation (SD) and Median and Inter Quartile Range (IQR) as well the Number (N) of values available for analysis and the number of values substituted by the last observation carried forward (LOCF) method (in brackets).

| <b>Wound volume (mm<sup>3</sup>) in the PP population</b> | <b>NPWT<br/>N=44</b>                      | <b>SMWC<br/>N=110</b>                      |
|-----------------------------------------------------------|-------------------------------------------|--------------------------------------------|
| <b>Randomization</b>                                      | 33359 (95749)<br>5746 (17330)<br>N=44 (1) | 14742 (36523)<br>3905 (11189)<br>N=110 (0) |
| <b>Week 1</b>                                             | 11606 (26991)<br>1824 (6113)<br>N=44 (5)  | 13525 (34844)<br>2470 (9479)<br>N=110 (16) |
| <b>Week 3</b>                                             | 8636 (24698)<br>777 (3199)<br>N=44 (6)    | 11907 (32047)<br>1864 (8039)<br>N=110 (7)  |
| <b>Week 5</b>                                             | 5480 (13967)<br>271 (1790)<br>N=44 (7)    | 8981 (25570)<br>1027 (4745)<br>N=110 (18)  |
| <b>Week 8</b>                                             | 3955 (9056)<br>192 (809)<br>N=44 (16)     | 6899 (18607)<br>506 (3915)<br>N=110 (29)   |
| <b>Week 12</b>                                            | 6052 (16114)<br>71 (681)<br>N=44 (25)     | 5964 (15930)<br>361 (1890)<br>N=110 (77)   |
| <b>Week 16</b>                                            | 3246 (11245)<br>0 (319)<br>N=44 (15)      | 3396 (10783)<br>57 (609)<br>N=110 (19)     |

Supplement Table 13: Wound volume at each observation time point during the study treatment time of maximum 16 weeks in the PP population

The table shows the wound volume at each study visit until the end of the maximum study treatment time of 16 weeks in the PP population. Wound volume was calculated from width, length and depth as documented in the eCRF. Data show Mean and Standard Deviation (SD) and Median and Inter Quartile Range (IQR) as well the number (N) of values available for analysis and the number of values substituted by the last observation carried forward (LOCF) method (in brackets).

| Wound tissue composition in the PP population | NPWT Granulation<br>N=44 |          | NPWT Fibrin<br>N=44 |          | NPWT Necrosis<br>N=44 |          | SMWC Granulation<br>N=110 |          | SMWC Fibrin<br>N=110 |          | SMWC Necrosis<br>N=110 |          |
|-----------------------------------------------|--------------------------|----------|---------------------|----------|-----------------------|----------|---------------------------|----------|----------------------|----------|------------------------|----------|
|                                               | eCRF                     | W.H.A.T. | eCRF                | W.H.A.T. | eCRF                  | W.H.A.T. | eCRF                      | W.H.A.T. | eCRF                 | W.H.A.T. | eCRF                   | W.H.A.T. |
| <b>Randomization</b>                          | 32 (37)                  | 23 (26)  | 18 (27)             | 68 (27)  | 2 (7)                 | 9 (15)   | 38 (38)                   | 26 (27)  | 21 (29)              | 67 (29)  | 1 (7)                  | 7 (15)   |
|                                               | 10 (68)                  | 13 (37)  | 3 (28)              | 69 (45)  | 0 (0)                 | 0 (15)   | 25 (80)                   | 16 (42)  | 10 (33)              | 77 (56)  | 0 (0)                  | 0 (8)    |
|                                               | 44 (1)                   | 41 (2)   | 44 (1)              | 41 (2)   | 44 (1)                | 41 (2)   | 110 (0)                   | 102 (9)  | 110 (0)              | 102 (9)  | 108 (2)                | 102 (9)  |
| <b>Week 1</b>                                 | 72 (37)                  | 22 (26)  | 7 (13)              | 70 (28)  | 2 (7)                 | 9 (15)   | 54 (35)                   | 24 (27)  | 22 (24)              | 72 (27)  | 5 (14)                 | 5 (9)    |
|                                               | 90 (50)                  | 9 (41)   | 0 (10)              | 75 (50)  | 0 (0)                 | 0 (11)   | 63 (70)                   | 13 (42)  | 13 (28)              | 78 (42)  | 0 (1)                  | 0 (6)    |
|                                               | 44 (5)                   | 41 (8)   | 44 (6)              | 41 (8)   | 44 (7)                | 41 (8)   | 110 (16)                  | 102 (27) | 110 (16)             | 102 (27) | 108 (19)               | 102 (27) |
| <b>Week 3</b>                                 | 77 (32)                  | 16 (24)  | 11 (19)             | 79 (26)  | 1 (4)                 | 6 (14)   | 61 (31)                   | 24 (27)  | 25 (25)              | 75 (26)  | 4 (11)                 | 3 (7)    |
|                                               | 93 (34)                  | 2 (29)   | 0 (20)              | 91 (37)  | 0 (0)                 | 0 (1)    | 70 (50)                   | 15 (42)  | 20 (35)              | 83 (41)  | 0 (0)                  | 0 (1)    |
|                                               | 44 (6)                   | 41 (9)   | 44 (7)              | 41 (9)   | 44 (7)                | 41 (9)   | 110 (9)                   | 102 (26) | 110 (10)             | 102 (26) | 108 (13)               | 102 (26) |
| <b>Week 5</b>                                 | 82 (29)                  | 10 (16)  | 9 (19)              | 87 (17)  | 1 (4)                 | 3 (9)    | 65 (29)                   | 19 (27)  | 24 (24)              | 78 (27)  | 3 (9)                  | 3 (11)   |
|                                               | 95 (20)                  | 4 (11)   | 2 (10)              | 93 (21)  | 0 (0)                 | 0 (1)    | 73 (46)                   | 4 (34)   | 13 (37)              | 93 (35)  | 0 (0)                  | 0 (0)    |
|                                               | 44 (7)                   | 41 (16)  | 44 (8)              | 41 (16)  | 44 (9)                | 41 (16)  | 110 (19)                  | 102 (27) | 110 (22)             | 102 (27) | 108 (22)               | 102 (27) |
| <b>Week 8</b>                                 | 85 (27)                  | 15 (25)  | 6 (13)              | 82 (26)  | 2 (6)                 | 3 (8)    | 74 (27)                   | 20 (26)  | 18(21)               | 77 (27)  | 3 (10)                 | 3 (12)   |
|                                               | 100 (20)                 | 1 (16)   | 0 (5)               | 96 (35)  | 0 (0)                 | 0 (0)    | 80 (31)                   | 3 (38)   | 10 (18)              | 91 (43)  | 0 (0)                  | 0 (0)    |
|                                               | 44 (9)                   | 41 (16)  | 44 (10)             | 41 (16)  | 44 (9)                | 41 (16)  | 110 (18)                  | 102 (30) | 110 (21)             | 102 (30) | 108 (25)               | 102 (30) |
| <b>Week 12</b>                                | 86 (26)                  | 13 (24)  | 6 (14)              | 85 (26)  | 2 (9)                 | 2 (6)    | 77 (27)                   | 18 (25)  | 16 (20)              | 80 (25)  | 3 (11)                 | 2 (6)    |
|                                               | 100 (18)                 | 1 (13)   | 0 (4)               | 99 (20)  | 0 (0)                 | 0 (0)    | 85 (29)                   | 3 (36)   | 10 (20)              | 92 (36)  | 0 (0)                  | 0 (0)    |
|                                               | 44 (26)                  | 41 (34)  | 44 (26)             | 41 (32)  | 44 (28)               | 41 (32)  | 110 (72)                  | 101 (78) | 110 (73)             | 102 (79) | 108 (73)               | 102 (80) |
| <b>Week 16</b>                                | 87 (25)                  | 12 (22)  | 6 (14)              | 86 (24)  | 0.1 (1)               | 1 (6)    | 80 (30)                   | 19 (25)  | 14 (24)              | 80 (26)  | 2 (11)                 | 1 (5)    |
|                                               | 100 (15)                 | 0 (14)   | 0 (1)               | 100 (20) | 0 (0)                 | 0 (0)    | 95 (20)                   | 5 (36)   | 0 (20)               | 92 (36)  | 0 (0)                  | 0 (0)    |
|                                               | 44 (14)                  | 41 (25)  | 44 (16)             | 41 (25)  | 44 (15)               | 41 (25)  | 110 (18)                  | 102 (42) | 110 (21)             | 102 (42) | 108 (24)               | 102 (42) |

Supplement Table 14: Wound tissue composition at each observation time point during the study treatment time of maximum 16 weeks in the PP population

Wound tissue composition (granulation, fibrin, and necrosis) is presented for the data documented in the eCRF and for the data derived from the photo analysis using the Wound Healing Analyzing Tool (W.H.A.T.). Data show Mean and Standard Deviation (SD) and Median and Inter Quartile Range (IQR) as well the number (N) of values analyzed for the PP population and the number (N) of values substituted by the last observation carried forward (LOCF) method (in brackets).

| <b>Pain in the PP population</b> | <b>Total<br/>N=154</b>          | <b>NPWT<br/>N=44</b>             | <b>SMWC<br/>N=110</b>            |
|----------------------------------|---------------------------------|----------------------------------|----------------------------------|
| <b>Screening</b>                 | 1.3 (2.1)<br>0 (2)<br>N=44 (0)  | 1.8 (2.3)<br>1 (3)<br>N=110 (0)  | 1,8 (2,3)<br>1 (3)<br>N=110 (0)  |
| <b>Week 1</b>                    | 0.7 (1.5)<br>0 (1)<br>N=44 (0)  | 1.4 (2.1)<br>0 (3)<br>N=110 (5)  | 1,4 (2,1)<br>0 (3)<br>N=110 (5)  |
| <b>Week 3</b>                    | 0.4 (0.7)<br>0 (1)<br>N=44 (4)  | 1.3 (1.8)<br>0 (2)<br>N=110 (3)  | 1,3 (1,8)<br>0 (2)<br>N=110 (3)  |
| <b>Week 5</b>                    | 0.3 (0.8)<br>0 (0)<br>N=44 (2)  | 1.0 (1.6)<br>0 (2)<br>N=110 (5)  | 1,0 (1,6)<br>0 (2)<br>N=110 (5)  |
| <b>Week 8</b>                    | 0.4 (1.1)<br>0 (0)<br>N=44 (4)  | 0.9 (1.5)<br>0 (2)<br>N=110 (9)  | 0,9 (1,5)<br>0 (2)<br>N=110 (9)  |
| <b>Week 12</b>                   | 0.3 (1.0)<br>0 (0)<br>N=44 (11) | 0.7 (1.3)<br>0 (1)<br>N=110 (18) | 0,7 (1,3)<br>0 (1)<br>N=110 (18) |
| <b>Week 16</b>                   | 0.2 (0.7)<br>0 (0)<br>N=44 (14) | 0.5 (1.2)<br>0 (0)<br>N=110 (13) | 0,5 (1,2)<br>0 (0)<br>N=110 (13) |

Supplement Table 15: Pain evaluation at the pre-defined observation time points during the active study treatment time of 16 weeks in the PP population

Data show Mean and Standard Deviation (SD) and Median and Inter Quartile Range (IQR) as well the Number (N) of values analyzed for the PP population and the Number (N) of values substituted by the last observation carried forward (LOCF) method (in brackets).

| <b>Quality of Life (EQ5D) in the PP population</b> | <b>Total<br/>N=154</b>                  | <b>NPWT<br/>N=44</b>                   | <b>SMWC<br/>N=110</b>                   |
|----------------------------------------------------|-----------------------------------------|----------------------------------------|-----------------------------------------|
| <b>Screening</b>                                   | 0.60 (0.21)<br>0.60 (0.24)<br>N=142 (4) | 0.61 (0.23)<br>0.63 (0.24)<br>N=42 (1) | 0.60 (0.20)<br>0.59 (0.25)<br>N=100 (3) |

|                                            |             |             |             |
|--------------------------------------------|-------------|-------------|-------------|
| <b>End of therapy</b>                      | 0.76 (0.19) | 0.65 (0.20) | 0.81 (0.14) |
|                                            | 0.76 (0.26) | 0.78 (0.20) | 0.87 (0.26) |
|                                            | N=34 (2)    | N=26 (2)    | N=8 (0)     |
| <b>End of maximum study treatment time</b> | 0.66 (0.22) | 0.65 (0.25) | 0.66 (0.21) |
|                                            | 0.63 (0.28) | 0.66 (0.43) | 0.63 (0.28) |
|                                            | N=92 (2)    | N=19 (0)    | N=73 (2)    |
| <b>Follow up after 6 months</b>            | 0.71 (0.23) | 0.75 (0.22) | 0.70 (0.23) |
|                                            | 0.77 (0.34) | 0.78 (0.30) | 0.77 (0.34) |
|                                            | N=99 (2)    | N=26 (0)    | N=73 (2)    |

Supplement Table 16: Quality of life evaluated with the EQ5D instrument at the pre-defined observation time points during the active study treatment time of 16 weeks in the PP population

Data show Mean and Standard Deviation (SD) and Median and Inter Quartile Range (IQR) as well the number (N) of values analyzed for the PP population and the Number (N) of values substituted by the last observation carried forward (LOCF) method (in brackets).
